# Supplementary material for: Epigenetic Age Acceleration Is Not Associated with Age-Related Macular Degeneration
Source: MDPI journal article supplement (doi:10.3390/ijms222413457), 2021-12-15
Supplement: s1 [file s1]

| Sample I.D. | Age when sample taken | Gender | Ever Smoked (Yes/NO) | AREDS  |
|-------------|-----------------------|--------|----------------------|--------|
| SC090       | 65                    | Male   | Yes                  | Normal |
| SC241       | 65                    | Male   | Yes                  | Normal |
| SC272       | 65                    | Male   | Yes                  | Normal |
| SC054       | 67                    | Female | Yes                  | Normal |
| SC205       | 67                    | Female | Yes                  | Normal |
| SC291       | 67                    | Male   | Yes                  | Normal |
| SC366       | 67                    | Female | Yes                  | Normal |
| SC137       | 68                    | Female | Yes                  | Normal |
| SC230       | 70                    | Male   | Yes                  | Normal |
| SC136       | 71                    | Female | Yes                  | Normal |
| SC282       | 83                    | Male   | No                   | Normal |
| SC122       | 84                    | Female | No                   | Normal |
| SC321       | 84                    | Female | No                   | Normal |
| SC105       | 85                    | Female | No                   | Normal |
| SC065       | 88                    | Male   | No                   | Normal |
| SC339       | 89                    | Female | No                   | Normal |
| SA012       | 91                    | Female | No                   | 3      |
| SA046       | 88                    | Female | No                   | 3      |
| SA246       | 88                    | Female | No                   | 3      |
| SA292       | 92                    | Female | No                   | 3      |
| SA348       | 88                    | Female | No                   | 3      |
| SA118       | 76                    | Male   | Yes                  | 2      |
| SA244       | 63                    | Male   | Yes                  | 2      |
| SA378       | 77                    | Male   | Yes                  | 2      |
| SA022       | 81                    | Male   | Yes                  | 3      |
| SA086       | 61                    | Female | Yes                  | 3      |
| SA088       | 89                    | Female | Yes                  | 3      |
| SA151       | 80                    | Female | Yes                  | 3      |
| SA167       | 94                    | Male   | Yes                  | 3      |
| SA273       | 80                    | Female | Yes                  | 3      |

**Table S1. Demographic Characteristics of blood gDNA samples used for whole genome DNA methylation analysis with EPIC array.**

| AMD Level | AREDS                                                                                                                                                                                                                                                                                                                        |
|-----------|------------------------------------------------------------------------------------------------------------------------------------------------------------------------------------------------------------------------------------------------------------------------------------------------------------------------------|
| 1         | Drusen maximum size < 63 µm and total area < 125 µm, and no pigment abnormalities                                                                                                                                                                                                                                            |
| 2         | (a) Drusen maximum size ≥ 63 µm but < 125 µm, or<br>(b) Drusen total area ≥ 125 µm, or<br>(c) RPE abnormalities consistent with AMD                                                                                                                                                                                          |
| 3         | (a) Drusen maximum size ≥ circle 125 µm, or<br>(b) Drusen maximum size ≥ circle 63 µm and total area > 180 µm and type is soft indistinct, or<br>(c) Drusen maximum size ≥ 63 µm and total area > 660 µm and type is soft distinct, or<br>(d) Geographic atrophy (atrophy > 180 µm) within grid but none at centre of macula |
| 4         | (a) Geographic atrophy in central subfield (advanced)<br>(b) Evidence of Neovascular AMD                                                                                                                                                                                                                                     |

**Table S2. AREDS Grading System.**

AMD level 1: no AMD; AMD level 2: Early AMD; AMD level 3: Intermediate AMD; AMD level 4: advanced atrophic AMD (Geographic atrophy) or choroidal neovascularization. Table adapted from reference [47].

|             |                      | Normal               | AMD                | p-value* |
|-------------|----------------------|----------------------|--------------------|----------|
| <b>N=44</b> | Average Age (Yrs±SD) | 74.06±9.39<br>(n=16) | 82±10.21<br>(n=14) | 0.0614   |
|             | Median Age (Min-Max) | 69 (65-89)           | 84.5 (61-94)       | -        |
|             | Male (%)             | 7 (43%)              | 5 (35%)            | -        |
|             | Female (%)           | 9 (57%)              | 9 (65%)            | -        |

**Table S3. Demographic characteristics of RPE gDNA samples (AMD cases and normal human donor RPE cells) analysed by genome wide DNA methylation 450k array (Porter et al. 2019).**

Mean and standard deviation (SD), median, minimum (min) and maximum (max) values were used to describe the distributions of age. \*From a non-parametric Mann-Whitney U test of means.

|                                       |                      | Non-Smoker           | Smoker               | p-value* |
|---------------------------------------|----------------------|----------------------|----------------------|----------|
| <b>EWAS Discovery Cohort<br/>N=44</b> | Average Age (Yrs±SD) | 87.27±2.93<br>(n=11) | 72.26±9.10<br>(n=19) | <0.0001  |
|                                       | Median Age (Min-Max) | 88 (83-92)           | 68 (61-94)           | -        |
|                                       | Male (%)             | 2 (18%)              | 10 (52%)             | -        |
|                                       | Female (%)           | 9 (82%)              | 9 (48%)              | -        |

**Table S4. Comparison of demographic characteristics of Smokers and Non-Smokers in the RPE gDNA cohort.** Mean and standard deviation (SD), median, minimum (min) and maximum (max) values were used to describe the distributions of age. \*From a non-parametric Mann-Whitney U test of means.

| <b>Clock</b> | <b>DF</b> | <b>Sum Sq</b> | <b>Mean Sq</b> | <b>F- value</b> | <b>Pr(&gt;F)</b> | <b>FDR-adjusted p-Value</b> | <b>Significant (Yes/No)</b> |
|--------------|-----------|---------------|----------------|-----------------|------------------|-----------------------------|-----------------------------|
| Horvath      | 3         | 418.1703215   | 139.3901072    | 2.793016        | 0.060255         | 0.06025537                  | No                          |
| Hannum       | 3         | 348.803089    | 116.2676963    | 4.20822         | 0.014904         | 0.02235675                  | Yes                         |
| Skin & Blood | 3         | 298.1122679   | 99.37075598    | 4.898102        | 0.007879         | 0.02235675                  | Yes                         |

**Table S5. One-way ANOVA results for the Horvath multi-tissue, Hannum and Skin & Blood epigenetic clocks using whole-blood derived gDNA from stratified groups within Southampton Cohort.**

One-way ANOVA's were performed for the Horvath multi-tissue, Hannum and Skin & Blood epigenetic clocks. Benjamini- Hochberg FDR adjusted to account for multiple testing was applied to the F-Test values for each ANOVA (3x F-test values corrected for multiple testing). The Hannum and Skin & Blood epigenetic clocks displayed significant FDR-adjusted p-values and were selected for the TukeyHSD post-hoc test (Additional File 2, Table S6) to assess differences between groups.

| Epigenetic Clock   | Groups Tested                        | Significant (Yes/No) | Tukey's Multiple Comparisons test Adjusted <i>p</i> -Value |
|--------------------|--------------------------------------|----------------------|------------------------------------------------------------|
| Hannum Clock       | Normal Non-Smoker vs. AMD Non-Smoker | No                   | 0.9769                                                     |
|                    | Normal Non-Smoker vs. Normal Smoker  | No                   | 0.0641                                                     |
|                    | Normal Non-Smoker vs. AMD Smoker     | No                   | 0.2401                                                     |
|                    | AMD Non-Smoker vs. Normal Smoker     | Yes                  | 0.0334                                                     |
|                    | AMD Non-Smoker vs. AMD Smoker        | No                   | 0.1325                                                     |
|                    | Normal Smoker vs. AMD Smoker         | No                   | 0.8811                                                     |
| Skin & Blood Clock | Normal Non-Smoker vs. AMD Non-Smoker | No                   | 0.3915                                                     |
|                    | Normal Non-Smoker vs. Normal Smoker  | No                   | 0.2302                                                     |
|                    | Normal Non-Smoker vs. AMD Smoker     | No                   | 0.6037                                                     |
|                    | AMD Non-Smoker vs. Normal Smoker     | Yes                  | 0.0064                                                     |
|                    | AMD Non-Smoker vs. AMD Smoker        | Yes                  | 0.0335                                                     |
|                    | Normal Smoker vs. AMD Smoker         | No                   | 0.8678                                                     |

**Table S6. EAA comparison from DNAm age estimation analysis from the Horvath multi-tissue, Hannum and Skin & Blood epigenetic clocks using whole-blood derived gDNA from stratified groups within Southampton Cohort.**

Samples from the Southampton Cohort were stratified to compare the following groups: Normal Non-Smoker (n=6), AMD Non-Smoker (n=5), Normal Smoker (n=10) and AMD Smoker (n=9). Individual *p*-values for each comparison were derived using an Ordinary One-way ANOVA with the TukeyHSD post-hoc test (\**p*≤0.05;\*\*\**p*≤0.001).

| Tissue       | Control Sample Number (n) | AMD Sample Number (n) | Method              | Differential expression of RPTOR (Yes/No) | Log Fold Change (if applicable) | p-value         | Reference |
|--------------|---------------------------|-----------------------|---------------------|-------------------------------------------|---------------------------------|-----------------|-----------|
| RPE/ Choroid | 31                        | 37                    | Microarray          | No                                        | N/A                             | N/A             | [57]      |
| RPE/ Choroid | 9                         | 9                     | Microarray          | No                                        | N/A                             | N/A             | [58]      |
| RPE/ Choroid | 8                         | 8                     | Bulk RNA-Seq        | Yes                                       | +1.57477103<br>986035           | 0.0207<br>69021 | [59]      |
| RPE/ Choroid | 2                         | 1                     | Single cell RNA-seq | Yes                                       | -<br>0.016671905                | 0.3013<br>22297 | [60]      |
| RPE/ Choroid | 106                       | 23                    | Bulk RNA-seq        | No                                        | N/A                             | N/A             | [61]      |

**Table S7.** Differential expression of RPTOR from published transcriptomes investigating gene expression changes in AMD RPE.

Additional references:

[57] Newman AM et al. Systems-level analysis of age-related macular degeneration reveals global biomarkers and phenotype-specific functional networks. *Genome Med.* 2012. 4(2):16.

[58] Whitmore SS et al. Altered gene expression in dry age-related macular degeneration suggests early loss of choroidal endothelial cells. *Mol Vis.* 2013. 19:2274–97.

[59] Kim EJ et al. Complete transcriptome profiling of normal and age-related macular degeneration eye tissues reveals dysregulation of anti-sense transcription. *Sci Rep.* 2018. 8(1):3040.

[60] Voigt AP. et al. Single-cell transcriptomics of the human retinal pigment epithelium and choroid in health and macular degeneration. *Proc. Natl Acad. Sci.* 2019. 116:24100–24107.

[61] Orcozo LD et al. Integration of eQTL and a Single-Cell Atlas in the Human Eye Identifies Causal Genes for Age-Related Macular Degeneration. *Cell Rep.* 2020. 30(4):1246-1259.e6.

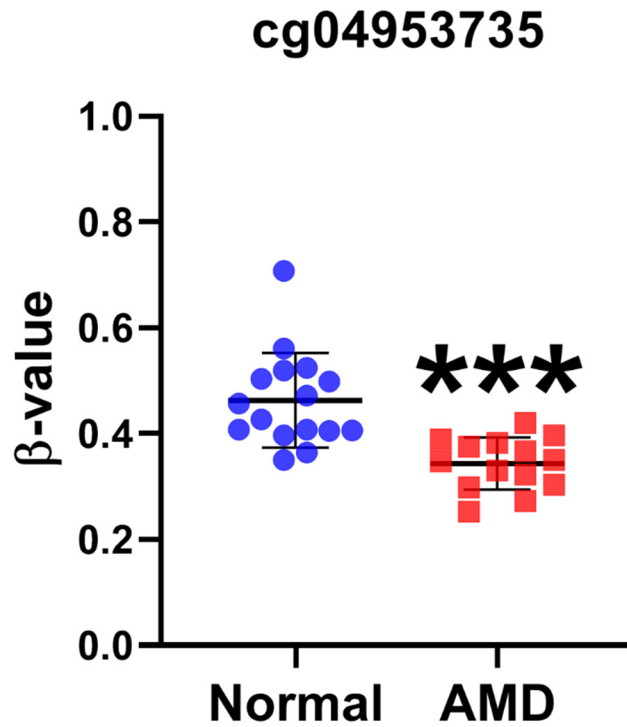

**Figure S1. cg04953735 (*RPTOR*) displays a significant decrease in DNA methylation in human donor whole blood of AMD patients.**

Methylation  $\beta$  value scatter plot for AMD (n=14) compared to Normal (n=16) human donor whole blood gDNA for cg04953735 (*RPTOR*). DNA methylation  $\beta$  values were significantly reduced in AMD compared to Normal human donor whole blood gDNA samples. (\*\*\*) $p=0.0001$ ) All statistical analysis was performed using the parametric unpaired t-test.
