# Supplementary material for: Epigenetic Age Acceleration Is Not Associated with Age-Related Macular Degeneration
Source: Int J Mol Sci. 2021 Dec 15;22(24):13457. doi: 10.3390/ijms222413457 (PMC8705580; doi:10.3390/ijms222413457)
Supplement: Supplementary file 1 [file ijms-22-13457-s001.zip › Additional_File_S1.xlsx]

## Sheet: Whole Blood DNAm Age Prediction
Sample_Name	Chronological Age (Years)	Smoker (Yes/No)	Gender (Male/Female)	Disease State (AMD/Normal)	Horvath Multi Tissue Clock Predicted DNAm Age (Years)	Hannum Clock Predicted DNAm Age (Years)	Skin & Blood Clock Predicted DNAm Age (Years)	Horvath Multi Tissue Clock Age Acceleration Difference (Years)	Hannum Clock Age Acceleration Difference (Years)	Skin & Blood Clock Age Acceleration Difference (Years)
SC137	68	Yes	Female	Normal	80.3981	60.1536	69.6391	12.3981	-7.84637	1.63915
SC339	89	No	Female	Normal	95.0129	75.1104	82.2148	6.01292	-13.8896	-6.78521
SC230	70	Yes	Male	Normal	73.5075	60.9987	69.0312	3.50754	-9.00132	-0.968799
SC321	84	No	Female	Normal	89.6263	73.5837	82.5556	5.62628	-10.4163	-1.44438
SC136	71	Yes	Female	Normal	76.0181	57.3083	65.8026	5.01809	-13.6917	-5.19744
SC122	84	No	Female	Normal	72.1134	60.5305	71.9839	-11.8866	-23.4695	-12.0161
SC272	65	Yes	Male	Normal	74.5191	60.9707	66.6728	9.51911	-4.02926	1.67276
SC054	67	Yes	Female	Normal	77.5728	51.0615	69.8897	10.5728	-15.9385	2.88974
SC282	83	No	Male	Normal	89.056	70.1615	78.6288	6.05602	-12.8385	-4.37123
SC090	65	Yes	Male	Normal	69.7409	53.835	56.1658	4.74088	-11.165	-8.83422
SC366	67	Yes	Female	Normal	68.1631	54.9585	59.5885	1.16313	-12.0415	-7.41147
SC205	67	Yes	Female	Normal	77.2982	59.0891	68.3905	10.2982	-7.91092	1.39054
SC291	67	Yes	Male	Normal	83.5744	60.4079	61.4493	16.5744	-6.59208	-5.55068
SC105	85	No	Female	Normal	85.305	67.3707	79.2234	0.305046	-17.6293	-5.77661
SC241	65	Yes	Male	Normal	69.9449	57.8414	59.7136	4.94493	-7.1586	-5.28639
SC065	88	No	Male	Normal	84.2471	66.2344	75.6969	-3.75289	-21.7656	-12.3031
SA167	94	Yes	Male	AMD	119.513	86.9934	87.9655	25.5129	-7.00657	-6.03447
SA292	92	No	Female	AMD	85.3302	80.3209	77.1573	-6.66978	-11.6791	-14.8427
SA378	77	Yes	Male	AMD	82.6443	68.921	78.4393	5.64427	-8.07896	1.43928
SA086	61	Yes	Female	AMD	67.2093	45.9446	59.115	6.20931	-15.0554	-1.88504
SA046	88	No	Female	AMD	83.8526	61.6004	70.2512	-4.14737	-26.3996	-17.7488
SA022	81	Yes	Male	AMD	82.2368	64.4991	71.8631	1.23678	-16.5009	-9.13687
SA088	89	Yes	Female	AMD	80.5367	71.0387	76.22	-8.46332	-17.9613	-12.78
SA118	76	Yes	Male	AMD	80.398	66.1302	72.1	4.39803	-9.86981	-3.90005
SA151	80	Yes	Female	AMD	89.7134	71.5923	80.2869	9.71337	-8.40771	0.286942
SA246	88	No	Female	AMD	97.9141	81.0456	82.9832	9.91409	-6.9544	-5.01683
SA244	63	Yes	Male	AMD	72.2204	55.0078	61.1264	9.22043	-7.99222	-1.87361
SA012	91	No	Female	AMD	84.7945	63.1675	79.6847	-6.20554	-27.8325	-11.3153
SA273	80	Yes	Female	AMD	83.057	69.0062	76.4764	3.05704	-10.9938	-3.52362
SA348	88	No	Female	AMD	88.0037	71.0636	79.4078	0.00366008	-16.9364	-8.59215

## Sheet: RPE DNAm Age Predicition
Sample Name	Chronological Age (Years)	Disease State (AMD/Normal)	Horvath Multi Tissue Clock Predicted DNAm Age (Years)	Hannum Clock Predicted DNAm Age (Years)	Skin & Blood Clock Predicted DNAm Age (Years)	Horvath Multi Tissue Clock Age Acceleration Difference (Years)	Hannum Clock Age Acceleration Difference (Years)	Skin & Blood Clock Age Acceleration Difference (Years)
ETR265	61	Normal	30.6987	26.3216	12.1869	-30.3013	-34.6784	-48.8131
ETR164	65	Normal	26.4519	18.0338	6.29638	-38.5481	-46.9662	-58.7036
ETR261	83	Normal	37.1972	28.4383	30.5643	-45.8028	-54.5617	-52.4357
ETR244	73	Normal	30.1889	30.9658	18.0484	-42.8111	-42.0342	-54.9516
ETR176	74	Normal	27.1704	26.8204	14.3663	-46.8296	-47.1796	-59.6337
ETR170	70	Normal	39.1221	30.4011	19.1464	-30.8779	-39.5989	-50.8536
ETR161	66	Normal	31.9024	25.7417	21.1963	-34.0976	-40.2583	-44.8037
ETR175	71	Normal	37.451	33.9495	24.3116	-33.549	-37.0505	-46.6884
ETR157	85	Normal	36.3251	23.6664	20.5547	-48.6749	-61.3336	-64.4453
ETR151	72	Normal	33.5627	30.4621	17.5359	-38.4373	-41.5379	-54.4641
ETR276	78	Normal	36.3626	33.3047	23.1708	-41.6374	-44.6953	-54.8292
ETR259	74	Normal	31.6121	35.4331	24.7778	-42.3879	-38.5669	-49.2222
ETR269	72	Normal	34.6833	18.4809	5.47342	-37.3167	-53.5191	-66.5266
ETR214	82	Normal	32.1882	30.8989	9.86382	-49.8118	-51.1011	-72.1362
ETR258	75	Normal	36.8027	32.5935	20.5044	-38.1973	-42.4065	-54.4956
ETR243	75	Normal	35.8581	19.6448	7.70136	-39.1419	-55.3552	-67.2986
ETR283	83	Normal	28.8642	23.4056	11.1179	-54.1358	-59.5944	-71.8821
ETR289	74	Normal	35.4681	29.1744	26.6896	-38.5319	-44.8256	-47.3104
ETR162	66	Normal	20.9902	19.1004	11.9118	-45.0098	-46.8996	-54.0882
ETR213	78	AMD	32.4528	28.4818	23.6989	-45.5472	-49.5182	-54.3011
ETR148	83	AMD	29.7101	18.9509	3.3211	-53.2899	-64.0491	-79.6789
ETR264	62	AMD	26.9711	21.7675	10.6037	-35.0289	-40.2325	-51.3963
ETR264	73	AMD	41.1754	34.0477	25.369	-31.8246	-38.9523	-47.631
ETR210	75	AMD	24.9207	29.0131	15.7594	-50.0793	-45.9869	-59.2406
ETR221	76	AMD	36.964	33.8201	27.7185	-39.036	-42.1799	-48.2815
ETR216	79	AMD	51.4933	36.559	26.6813	-27.5067	-42.441	-52.3187
ETR208	89	AMD	33.8751	27.6392	17.1363	-55.1249	-61.3608	-71.8637
ETR220	70	AMD	32.3051	31.6219	23.14	-37.6949	-38.3781	-46.86
ETR231	83	AMD	45.9534	39.9792	33.7846	-37.0466	-43.0208	-49.2154
ETR203	76	AMD	47.2859	41.0332	31.2877	-28.7141	-34.9668	-44.7123
ETR292	72	AMD	41.7269	32.0911	19.5274	-30.2731	-39.9089	-52.4726
ETR223	66	AMD	30.4788	24.8224	14.7138	-35.5212	-41.1776	-51.2862
ETR173	84	AMD	38.913	32.4185	27.7078	-45.087	-51.5815	-56.2922
ETR215	77	AMD	33.4784	32.1088	15.7467	-43.5216	-44.8912	-61.2533
ETR226	68	AMD	32.762	28.5756	24.5952	-35.238	-39.4244	-43.4048
ETR278	62	AMD	14.9839	12.1695	1.61827	-47.0161	-49.8305	-60.3817
ETR171	80	AMD	42.5672	26.413	11.0796	-37.4328	-53.587	-68.9204
ETR201	76	AMD	33.1086	28.4255	14.9122	-42.8914	-47.5745	-61.0878
ETR285	74	AMD	32.2584	29.4398	23.5665	-41.7416	-44.5602	-50.4335
ETR224	84	AMD	29.951	32.5816	26.5156	-54.049	-51.4184	-57.4844
ETR229	59	AMD	22.883	12.3273	2.90849	-36.117	-46.6727	-56.0915
ETR219	71	AMD	31.4654	18.6662	4.04872	-39.5346	-52.3338	-66.9513
ETR204	74	AMD	37.379	31.011	26.6582	-36.621	-42.989	-47.3418
ETR249	50	AMD	22.6119	22.4931	11.3451	-27.3881	-27.5069	-38.6549
