# Supplementary material for: Epigenetic Age Acceleration Is Not Associated with Age-Related Macular Degeneration
Source: Int J Mol Sci. 2021 Dec 15;22(24):13457. doi: 10.3390/ijms222413457 (PMC8705580; doi:10.3390/ijms222413457)
Supplement: Supplementary file 1 [file ijms-22-13457-s001.zip › Additional_File_S3.xlsx]

## Sheet: Whole_Blood_Differential_Methyl
Probe I.D	Gene I.D	logFC	Unadjusted p-Value	Chromosome (Hg19)	Position (Hg19)	Relation to CpG Island	Relation to Gene
cg24522809	UPP2	-0.472041	1.01e-06	chr2	158851594	OpenSea	TSS200
cg15985873	NOX5;NOX5;NOX5;MIR548H4	0.412924	1.4e-05	chr15	69264323	OpenSea	Body;Body;Body;Body
cg21175976	BLK	-0.922913	1.53e-05	chr8	11421337	Island	Body
cg07212053	UBE4A;UBE4A	0.480523	1.87e-05	chr11	118230307	Island	5'UTR;1stExon
cg14426911	SEMA5A	-0.637686	2.07e-05	chr5	9363104	OpenSea	Body
cg05306123	INTS7;INTS7;INTS7;INTS7;INTS7	0.523689	2.6e-05	chr1	212159068	OpenSea	Body;Body;Body;Body;Body
cg06569202	SEC1P;DBP	0.511049	4.21e-05	chr19	49140842	Island	TSS1500;TSS200
cg12917056	LOC102724919;PDC;PDC;MIR548F1	0.545557	4.38e-05	chr1	186416576	OpenSea	Body;Body;5'UTR;Body
cg12855166	MYO1D	-0.955213	4.56e-05	chr17	30846586	Island	Body
cg23282837	CSMD3;CSMD3	-0.554156	5.06e-05	chr8	114449418	OpenSea	TSS200;TSS200
cg17303711	ZSCAN22	0.472499	5.27e-05	chr19	58838235	Island	TSS200
cg17303822		1.10784	5.4e-05	chr4	120992550	OpenSea
cg22945982	VWA8;VWA8	0.827121	5.85e-05	chr13	42443309	OpenSea	Body;Body
cg04953735	RPTOR;RPTOR	-0.731183	6.51e-05	chr17	78652628	OpenSea	Body;Body
cg08636246	AP4B1-AS1;RSBN1;RSBN1	0.400242	7.37e-05	chr1	114354993	Island	TSS1500;1stExon;Body
cg17247365	WWOX;WWOX;WWOX;WWOX	-0.787477	7.97e-05	chr16	78275151	OpenSea	Body;Body;Body;Body
cg03380182		0.777809	8.36e-05	chr1	244065456	OpenSea
cg13955747	TMEM18	0.301564	8.38e-05	chr2	677585	Island	TSS200
cg22541572	LRCH1;LRCH1;LRCH1	0.662406	8.71e-05	chr13	47237047	OpenSea	Body;Body;Body
cg07642595	LAMP1	-0.545208	9.06e-05	chr13	113952548	S_Shore	Body
cg09228785	CD82;CD82	0.574387	9.91e-05	chr11	44630602	OpenSea	Body;Body
cg18120899	HDGFRP3	0.541057	0.000101898	chr15	83826939	OpenSea	Body
cg18314690	RPA3	0.546327	0.000102891	chr7	7747964	OpenSea	5'UTR
cg00125389	LRP1B	-0.348334	0.000103629	chr2	142292884	OpenSea	Body
cg23327425		0.42554	0.00011258	chr1	234807310	OpenSea
cg22196743		0.419196	0.000116462	chr22	36501278	OpenSea
cg21370868	EHBP1;EHBP1;EHBP1;EHBP1	0.529099	0.000119099	chr2	63191365	OpenSea	Body;Body;Body;Body
cg12609785		1.88215	0.000129261	chr17	43660871	N_Shore
cg16306870	C3orf21	-0.64159	0.000131473	chr3	194868790	OpenSea	Body
cg00599812	ATAD3C	0.688834	0.000134915	chr1	1385047	OpenSea	TSS200
cg01216311		-0.488901	0.00013895	chr17	7025714	OpenSea
cg02145101	DHRS1;C14orf21;DHRS1	0.656981	0.00014722	chr14	24768773	Island	5'UTR;TSS1500;TSS200
cg21027616	PTPRE;PTPRE	0.497679	0.000147703	chr10	129865845	OpenSea	Body;Body
cg12706330	GHITM	0.578765	0.00015324	chr10	85898700	N_Shore	TSS1500
cg19760965	C3orf21	-0.704829	0.000153647	chr3	194868843	OpenSea	Body
cg13821355		0.687795	0.000154404	chr5	76079919	OpenSea
cg08468679	TRIM11	0.622015	0.000155568	chr1	228594648	Island	TSS200
cg12640097	RPL7	-0.654364	0.000164759	chr8	74205666	N_Shore	Body
cg11587950	BPHL;BPHL;BPHL;BPHL	-0.285641	0.000169787	chr6	3136887	N_Shelf	Body;Body;Body;Body
cg09159795	CRYGN	0.383796	0.000176776	chr7	151127123	N_Shore	3'UTR
cg14660726		-0.634372	0.000177181	chr1	221047545	N_Shelf
cg04074793	MKI67;MKI67;MKI67;MKI67	-0.624152	0.000177961	chr10	129924374	Island	1stExon;5'UTR;1stExon;5'UTR
cg13778226		-0.745363	0.000181064	chr8	62722789	OpenSea
cg14026188		0.42245	0.000181547	chr5	121531921	OpenSea
cg14272338	FLJ31306;FLJ31306;ARID4A;ARID4A;ARID4A	0.547599	0.000182798	chr14	58765693	Island	TSS1500;TSS1500;5'UTR;5'UTR;5'UTR
cg20958117	TMEFF2;TMEFF2	0.491398	0.000189519	chr2	192949224	OpenSea	Body;Body
cg00178648	PTPRG	0.505241	0.000199564	chr3	62008370	OpenSea	Body
cg23756354	IER3	-0.288088	0.00020118	chr6	30713097	S_Shore	TSS1500
cg17169333	C8orf37	0.415716	0.00020364	chr8	96281960	S_Shore	TSS1500
cg22719651	RTN2;RTN2;RTN2;RTN2;RTN2	-0.341548	0.000213942	chr19	45997414	N_Shore	TSS1500;ExonBnd;ExonBnd;Body;Body
cg04872075	FBXO31;FBXO31	-0.879081	0.000218577	chr16	87379784	OpenSea	Body;Body
cg25747777		0.65747	0.000221494	chr10	125188120	OpenSea
cg14182324	SIDT1;SIDT1	-0.597416	0.00022991	chr3	113321500	OpenSea	Body;Body
cg05721377	MAP2K4	-0.550797	0.000236683	chr17	11923905	N_Shore	TSS1500
cg08085208	DLST	0.650473	0.00024083	chr14	75348779	Island	Body
cg03902160	PTPRU;PTPRU;PTPRU	-0.779203	0.00024118	chr1	29586660	N_Shore	Body;Body;Body
cg05769091	CYB5D2;CYB5D2;CYB5D2	0.335205	0.000242107	chr17	4048975	S_Shore	5'UTR;Body;5'UTR
cg22670222	WDFY2	0.720256	0.000242684	chr13	52255752	OpenSea	Body
cg01012308	TRAP1	-0.360557	0.000246154	chr16	3767753	Island	TSS200
cg06763280	NFIX	-0.882053	0.000249807	chr19	13105887	N_Shore	TSS1500
cg27456756	CAPRIN1;CAPRIN1	-0.291476	0.000251569	chr11	34083592	OpenSea	Body;Body
cg14840487	MOSC1	0.401654	0.000255515	chr1	220962870	S_Shelf	Body
cg05582165	C3orf17;C3orf17;C3orf17	0.563296	0.000259527	chr3	112738652	Island	TSS200;TSS200;TSS200
cg02118635	RAD51C;TEX14;RAD51C;TEX14;RAD51C;RAD51C	-0.775312	0.000265893	chr17	56770003	Island	5'UTR;TSS1500;1stExon;TSS1500;1stExon;5'UTR
cg13294447	DIP2B	1.23923	0.000266342	chr12	51029261	OpenSea	Body
cg17369196	HLA-DOB	0.4993	0.000268162	chr6	32784487	OpenSea	Body
cg00556279	TMEM233;TMEM233	-0.457313	0.000271583	chr12	120031649	Island	5'UTR;1stExon
cg22664064	NMI	-0.60909	0.000271868	chr2	152146702	S_Shore	TSS1500
cg23975425		0.249449	0.000272028	chr5	173180686	OpenSea
cg17017644	FAM186A	0.343921	0.000272485	chr12	50747550	OpenSea	Body
cg15391690		0.300118	0.000272583	chr17	47966866	N_Shore
cg18721802	CDK5RAP3;CDK5RAP3;CDK5RAP3;CDK5RAP3;CDK5RAP3	0.426225	0.000274635	chr17	46048201	Island	TSS200;TSS200;TSS200;TSS200;Body
cg15658542		0.587292	0.000276486	chr15	64654899	OpenSea
cg15072451	MAPT;MAPT;MAPT;MAPT;MAPT;MAPT;MAPT;MAPT	-0.33022	0.000279345	chr17	44001672	OpenSea	5'UTR;5'UTR;5'UTR;5'UTR;5'UTR;5'UTR;5'UTR;5'UTR
cg20657642		0.375677	0.000282142	chr7	25844834	OpenSea
cg00103132	TESK2	0.570139	0.000289341	chr1	45956932	S_Shore	TSS200
cg25632300	SFXN1;SFXN1	0.537487	0.00029263	chr5	174905618	Island	1stExon;5'UTR
cg18048309	KIAA1688	0.315624	0.000292957	chr8	145787687	OpenSea	Body
cg17772543		-0.475824	0.000295558	chr19	47925344	Island
cg13896608	CAMK1	-0.390236	0.000295758	chr3	9811407	N_Shore	5'UTR
cg04738301	NTN4	0.605478	0.000296014	chr12	96184580	Island	TSS200
cg00383006	CFAP52;CFAP52	0.352662	0.000297058	chr17	9538420	OpenSea	Body;Body
cg10880709	MAEA;MAEA;MAEA;MAEA;MAEA	0.370906	0.000313014	chr4	1283506	Island	TSS200;TSS200;TSS200;TSS200;TSS200
cg27573493		0.614306	0.000315308	chr13	80026237	OpenSea
cg01871533	DHX35;DHX35;DHX35	-0.783677	0.000316096	chr20	37614741	OpenSea	Body;Body;Body
cg24929438		0.429117	0.000319185	chr15	59867110	OpenSea
cg26522240	ZEB2;ZEB2;ZEB2;ZEB2;ZEB2	-0.348744	0.000322089	chr2	145277843	N_Shelf	Body;5'UTR;1stExon;1stExon;5'UTR
cg22514756		-0.714004	0.00032263	chr1	156426017	N_Shore
cg01425837	COBL;COBL;COBL	0.35254	0.000324639	chr7	51319004	OpenSea	Body;Body;Body
cg01097940	SPSB2;SPSB2	0.276648	0.000335392	chr12	6982320	Island	5'UTR;5'UTR
cg02609144	KCNQ3	-0.709111	0.000338886	chr8	133204331	OpenSea	Body
cg25504988	TRIM39;HCG18;HCG18	-0.92473	0.00034113	chr6	30293159	N_Shore	TSS1500;Body;Body
cg07490808	GREB1L	-0.735286	0.000345185	chr18	19024872	OpenSea	Body
cg12041169	SCLT1	0.651585	0.000345851	chr4	129919593	OpenSea	Body
cg16083439	LACE1	-0.602487	0.000349469	chr6	108615723	N_Shore	TSS1500
cg26918442	ADAL;ADAL;LCMT2;LCMT2	0.343408	0.000351623	chr15	43622840	Island	TSS200;TSS200;5'UTR;1stExon
cg07980995	SNRPE;SNRPE;SNRPE	0.460815	0.00035579	chr1	203832396	S_Shore	Body;Body;Body
cg13467169	C1orf77;S100A13	-0.746815	0.000355851	chr1	153606345	Island	TSS200;5'UTR
cg11001780	DIP2C	0.750943	0.000356145	chr10	623056	OpenSea	Body
cg02554771		0.557573	0.000356883	chr3	66982915	OpenSea
cg26910205	SMEK1	0.331122	0.00035716	chr14	91977306	Island	TSS1500
cg16391294	LRP1B	-0.558698	0.000364273	chr2	142314829	OpenSea	Body
cg15622269	ASB15;ASB15	0.359225	0.000365056	chr7	123247920	OpenSea	5'UTR;TSS1500
cg14279466	PET100;PET100;XAB2	0.417842	0.000367139	chr19	7694639	S_Shore	TSS200;TSS200;TSS1500
cg06625852	ABCA17P	0.613538	0.000370766	chr16	2416779	OpenSea	Body
cg05586662	VPS13B;VPS13B;VPS13B;VPS13B	0.698017	0.000370995	chr8	100024465	N_Shore	TSS1500;TSS1500;TSS1500;TSS1500
cg23519755	KANSL1;KANSL1;KANSL1	-0.6286	0.000371355	chr17	44124560	OpenSea	Body;Body;Body
cg26930006		-0.360584	0.000378075	chr14	60798844	S_Shelf
cg08006209	FLJ22447	-0.499652	0.000378197	chr14	62066169	OpenSea	Body
cg07054927		0.794385	0.000378788	chr19	1300085	Island
cg17128417	GDF7	-0.710929	0.000392179	chr2	20865088	N_Shore	TSS1500
cg12017911	ISLR2;LOC283731;ISLR2;ISLR2;ISLR2;ISLR2	0.315992	0.000393019	chr15	74421887	Island	5'UTR;TSS1500;TSS1500;TSS1500;1stExon;TSS200
cg00611751	LNP1;TOMM70A	0.357358	0.000394564	chr3	100119298	N_Shore	TSS1500;Body
cg15090202		-0.868731	0.000400231	chr1	26687087	Island
cg06335515	ZNF366	-0.460155	0.000400897	chr5	71800351	OpenSea	5'UTR
cg21652471	SH2D2A;SH2D2A;SH2D2A;SH2D2A;SH2D2A;NTRK1	0.316436	0.000403982	chr1	156786673	S_Shelf	TSS1500;TSS200;TSS200;TSS200;TSS200;Body
cg07023563	ARHGEF10L;ARHGEF10L	-0.935647	0.000418577	chr1	17989633	OpenSea	Body;Body
cg01381678	HECW2	-0.558998	0.000418715	chr2	197458093	Island	TSS1500
cg10954740	KCNV1	0.513564	0.000419158	chr8	110982709	N_Shelf	Body
cg25020897	CAPRIN2;CAPRIN2;CAPRIN2	0.356119	0.000421451	chr12	30907596	Island	TSS200;TSS200;TSS200
cg14789911	C21orf56;C21orf56	0.973596	0.000430173	chr21	47582049	Island	Body;Body
cg27327588	ZNF345	0.341589	0.000436154	chr19	37341052	Island	TSS1500
cg10439113	SLC17A6	-0.69593	0.000446162	chr11	22360177	N_Shelf	Body
cg13669060		0.431385	0.000452796	chr9	102131971	OpenSea
cg17117718		1.21492	0.000453586	chr17	43663208	Island
cg27449352	GPR63;GPR63	0.384898	0.00046032	chr6	97285386	Island	TSS200;TSS200
cg05891572	BBS9;BBS9;BBS9;BBS9	-0.384498	0.000462135	chr7	33462512	OpenSea	Body;Body;Body;Body
cg15862358	WIF1	0.677347	0.000473347	chr12	65516002	S_Shore	TSS1500
cg10490974		-0.515005	0.000473491	chr7	151587549	OpenSea
cg12360935	LOC257358	-0.470667	0.000487298	chr5	169757754	OpenSea	TSS1500
cg06058005		0.33566	0.000487484	chr2	55658960	OpenSea
cg05644498	SMAD9;SMAD9	-0.573095	0.000487812	chr13	37493547	N_Shore	5'UTR;5'UTR
cg04884661		-0.765512	0.000495232	chr17	46749496	OpenSea
cg13383435	MIR128-2;ARPP-21	-0.751007	0.00050924	chr3	35785958	OpenSea	TSS200;Body
cg16926446	LOC100996634	-0.319444	0.000515689	chr6	109557894	OpenSea	1stExon
cg20059597	MGC57346-CRHR1;MGC57346-CRHR1	0.52828	0.000521476	chr17	43726219	OpenSea	5'UTR;5'UTR
cg02251027	SSC5D	-0.66347	0.000524134	chr19	56028687	Island	Body
cg07111834	PTPN22;PTPN22	-0.645647	0.000525239	chr1	114402309	OpenSea	Body;Body
cg07553182		-0.640985	0.000527432	chr2	228293852	OpenSea
cg21133936	LINC00856	-0.285499	0.000529983	chr10	80008235	OpenSea	TSS200
cg11967563	PITRM1	-0.290755	0.000532948	chr10	3186147	OpenSea	Body
cg27014286	TMEM238	0.519629	0.000536061	chr19	55895703	Island	TSS200
cg22378035	HYAL3;HYAL3;NAT6;NAT6;NAT6;HYAL3;HYAL3;HYAL3	0.516802	0.000536898	chr3	50336493	Island	5'UTR;5'UTR;Body;5'UTR;TSS200;TSS1500;Body;Body
cg17339512	NPR3;NPR3;NPR3;NPR3;NPR3	-0.647979	0.000543337	chr5	32711734	Island	5'UTR;5'UTR;1stExon;1stExon;Body
cg26570574	RAB3GAP2	0.560465	0.000543509	chr1	220415655	OpenSea	Body
cg01101773	ANKRD28	0.619156	0.000548881	chr3	15901650	Island	TSS1500
cg09362073	C1orf21	0.509708	0.000550215	chr1	184501421	OpenSea	Body
cg02015741		0.519995	0.000551319	chr5	3394050	OpenSea
cg05228404		-0.619118	0.000560646	chr10	125851279	Island
cg00834440	ANKS1B;ANKS1B;ANKS1B;ANKS1B;ANKS1B;ANKS1B;ANKS1B;ANKS1B	0.487271	0.000569957	chr12	99324842	OpenSea	Body;Body;Body;Body;Body;Body;Body;Body
cg16344896		0.396832	0.000573377	chr6	26269403	N_Shore
cg02459604	ZNF568;ZNF568;ZNF829	0.420817	0.000574049	chr19	37407284	Island	5'UTR;1stExon;TSS200
cg07038098		-0.504934	0.000584867	chr16	50727439	OpenSea
cg11862551		-1.06241	0.000589514	chr6	29817963	N_Shore
cg16006970	LINC00167;PRDM10;PRDM10	0.357666	0.000590803	chr11	129872985	Island	Body;TSS1500;TSS1500
cg24392197	XXYLT1-AS2;XXYLT1-AS2;XXYLT1;XXYLT1	-0.516542	0.000591807	chr3	194868438	OpenSea	TSS200;TSS200;Body;Body
cg05230203		-0.526372	0.000593928	chr10	60839741	OpenSea
cg17508905	TBC1D1	-0.366836	0.000597168	chr4	38121914	OpenSea	Body
cg01086446	GABRA1;GABRA1;GABRA1	-0.527496	0.000602916	chr5	161273853	OpenSea	TSS1500;TSS1500;TSS1500
cg14780681	WFDC3;DNTTIP1	0.524505	0.00060366	chr20	44420720	Island	TSS200;1stExon
cg18084389		-0.474869	0.000605125	chr5	102590290	OpenSea
cg16467929	MYH15	0.229234	0.000606055	chr3	108204398	OpenSea	Body
cg14780466	GDF7	-0.762733	0.000606367	chr2	20870812	Island	Body
cg00818480	NXPH4	0.51417	0.000607267	chr12	57609685	N_Shore	TSS1500
cg08723176	PXN;PXN;PXN	0.367178	0.000610259	chr12	120703615	S_Shore	TSS200;TSS200;TSS200
cg01013370	HMHA1;HMHA1;HMHA1;HMHA1;HMHA1	0.468919	0.000613142	chr19	1077051	S_Shore	5'UTR;1stExon;Body;Body;Body
cg17555949	GLRX3;GLRX3	0.470372	0.000617672	chr10	131968144	OpenSea	Body;Body
cg21775694		0.429772	0.000620268	chr8	62861079	OpenSea
cg16865965	VAMP5	-0.772681	0.000623124	chr2	85811662	Island	Body
cg20871800	USP48	0.864026	0.00062959	chr1	22051720	OpenSea	Body
cg04063848		0.476638	0.000632966	chr2	41637287	OpenSea
cg09906447	LINC00603	0.349331	0.000633419	chr5	40050932	OpenSea	TSS1500
cg25270236		0.325238	0.000634259	chr10	27482721	OpenSea
cg13584989		-0.372078	0.000640577	chr6	5965168	OpenSea
cg09758790		0.5621	0.000641458	chr10	85923679	OpenSea
cg24412006	FOXN4	-0.370441	0.000642965	chr12	109728152	N_Shore	Body
cg05132262		0.716033	0.000647627	chr7	1428859	OpenSea
cg12834479	USH2A;USH2A	-0.858653	0.000651658	chr1	216394841	OpenSea	Body;Body
cg21214470	GALNT13;LOC100144595;GALNT13	-0.410799	0.000652682	chr2	155307096	OpenSea	3'UTR;5'UTR;3'UTR
cg01384518	ANXA6;ANXA6	-0.49718	0.000660269	chr5	150495060	OpenSea	Body;Body
cg11429644		0.700431	0.000663628	chr2	147688823	OpenSea
cg15827169	ZNF608	-0.525435	0.000664955	chr5	124081730	OpenSea	TSS1500
cg08244199	AHI1;AHI1;AHI1	0.420224	0.000673399	chr6	135620669	OpenSea	Body;Body;Body
cg08641935		-0.714329	0.00067626	chr2	173575577	OpenSea
cg01669242	PTPRN2;PTPRN2;PTPRN2	-0.326101	0.000677034	chr7	157689758	N_Shore	Body;Body;Body
cg18149593	COX7A2L	0.3871	0.000677427	chr2	42588534	Island	TSS200
cg06069457	MFI2;MFI2	-0.341409	0.000682292	chr3	196754722	Island	Body;Body
cg09390181	IGSF21	0.639731	0.00068262	chr1	18433192	N_Shore	TSS1500
cg03846926	C10orf140	-0.427613	0.000689128	chr10	21807211	S_Shore	5'UTR
cg02132783	C1orf141;C1orf141;C1orf141	-0.666567	0.000690456	chr1	67600963	S_Shore	TSS1500;TSS1500;TSS1500
cg26363167	AP3M2;AP3M2;AP3M2;AP3M2	0.48418	0.000690542	chr8	42010494	Island	1stExon;5'UTR;5'UTR;1stExon
cg18213268		0.402341	0.000692216	chr8	8473069	OpenSea
cg00499210	NEAT1	0.347174	0.000693033	chr11	65190135	Island	TSS200
cg05167429		0.887678	0.000693535	chr16	33854086	S_Shore
cg15455612	PHF11;PHF11;PHF11	0.315126	0.000698879	chr13	50069932	N_Shore	5'UTR;1stExon;TSS1500
cg09391451		0.478011	0.000701676	chr3	104658148	OpenSea
cg17690268		-0.595582	0.000702883	chr17	47857556	OpenSea
cg18458775	KLHL29	0.546735	0.000716005	chr2	23655930	OpenSea	5'UTR
cg11799704	RNFT2;RNFT2	0.748234	0.00071644	chr12	117187868	Island	Body;Body
cg06911753	C1QTNF4	-0.492789	0.000716983	chr11	47611236	Island	3'UTR
cg07954583		0.401422	0.000717872	chr1	219934917	OpenSea
cg06790503	FAM81A	-0.379384	0.000718283	chr15	59809146	OpenSea	Body
cg01539879	NELL2	0.516558	0.000719325	chr12	45308559	OpenSea	TSS1500
cg09267324	MRC2	0.349895	0.000720553	chr17	60704634	Island	TSS200
cg16026475	FOXK1	0.325636	0.000721768	chr7	4729546	OpenSea	Body
cg18815117	MGC57346-CRHR1;MGC57346;MGC57346;MGC57346-CRHR1	-0.427718	0.000722539	chr17	43698604	S_Shore	TSS1500;Body;Body;5'UTR
cg19178324	KCNC1;KCNC1	0.782973	0.000724405	chr11	17759573	S_Shore	Body;Body
cg12966207		0.334427	0.000725213	chr1	101051016	OpenSea
cg04988209	RMST	-0.444604	0.000727269	chr12	97859261	OpenSea	Body
cg15771041	LEMD3;LEMD3	-0.385773	0.000727737	chr12	65582084	OpenSea	Body;Body
cg12271317	LEF1;LEF1;LEF1;LEF1	0.377447	0.000732776	chr4	108972693	OpenSea	3'UTR;3'UTR;Body;3'UTR
cg24410949	NLE1;NLE1	-0.24325	0.000733545	chr17	33458647	OpenSea	3'UTR;3'UTR
cg10545854	SPOP;SPOP;SPOP;SPOP;SPOP;SPOP	-0.654615	0.000739227	chr17	47755799	S_Shore	TSS1500;TSS1500;TSS1500;TSS1500;TSS1500;TSS1500
cg20401473	SLC35A1;SLC35A1	-0.566939	0.000756176	chr6	88186912	S_Shelf	Body;Body
cg00562665		0.351665	0.000757866	chr12	108520700	N_Shelf
cg11442421	COPG2;COPG2	-0.292214	0.000757951	chr7	130352236	N_Shore	Body;Body
cg02065387	GABRA1;GABRA1;GABRA1;GABRA1;GABRA1	0.510396	0.000757959	chr5	161274307	OpenSea	1stExon;TSS1500;TSS1500;5'UTR;TSS1500
cg17645528		-0.358538	0.000770769	chr3	141871386	S_Shelf
cg11149521	WDR81;WDR81;WDR81;WDR81	-0.729305	0.000772453	chr17	1628643	Island	5'UTR;1stExon;5'UTR;Body
cg21433668	TBXAS1;TBXAS1;HIPK2;HIPK2	0.487825	0.000773194	chr7	139478019	Island	TSS200;TSS200;TSS1500;TSS1500
cg06793691	ZNF131	0.592931	0.000773282	chr5	43121579	Island	TSS200
cg07590493	FUS;FUS;FUS;FUS	0.730747	0.000776869	chr16	31191788	Island	Body;Body;Body;Body
cg20902146	ARL1	0.691211	0.000777397	chr12	101802045	Island	TSS1500
cg02028970	HNRNPUL1;HNRNPUL1	0.250356	0.000777691	chr19	41770983	Island	Body;5'UTR
cg14834466	SUV420H1;SUV420H1	0.339429	0.000783513	chr11	67981677	Island	TSS1500;TSS1500
cg26989544		-0.98415	0.000783562	chr10	102406269	OpenSea
cg00916973		-0.582277	0.000783675	chr17	43580461	OpenSea
cg12680957		0.6687	0.000783853	chr15	64353131	OpenSea
cg05200811		1.2046	0.000786557	chr21	47581042	Island
cg04828277	MKRN1;MKRN1;MKRN1;MKRN1	-0.493263	0.00078919	chr7	140178937	Island	5'UTR;Body;Body;Body
cg02725269	KLK1	-0.673748	0.000796876	chr19	51327177	N_Shelf	TSS200
cg11898502	PKDREJ	0.341197	0.000800817	chr22	46652593	OpenSea	1stExon
cg08722104	PSMC3	0.272202	0.000804792	chr11	47448306	S_Shore	TSS1500
cg18184219	CEP170;CEP170;CEP170	0.376724	0.000805882	chr1	243388524	OpenSea	Body;Body;Body
cg18826381	SLC33A1;SLC33A1	0.489242	0.000818938	chr3	155571296	N_Shore	1stExon;1stExon
cg21497440	KLHL31	0.666397	0.000820619	chr6	53528692	OpenSea	5'UTR
cg24014020	PIGQ;PIGQ	-0.813859	0.000820693	chr16	620796	S_Shore	5'UTR;5'UTR
cg10687131	GDF7	-0.956969	0.000820886	chr2	20871002	Island	Body
cg22869168	RCAN3;RCAN3;RCAN3;RCAN3;RCAN3;RCAN3;RCAN3	0.400247	0.00082188	chr1	24832795	S_Shelf	TSS1500;5'UTR;5'UTR;5'UTR;5'UTR;5'UTR;5'UTR
cg13679478		-0.500559	0.000822476	chr14	102226547	N_Shore
cg21815267		0.479261	0.000824057	chr2	201117303	OpenSea
cg21682057	GMDS	0.539206	0.000824147	chr6	2245849	Island	TSS200
cg09095223	LOC100499484;LOC100499484-C9ORF174;LOC100499484-C9ORF174;LOC100499484-C9ORF174	0.498571	0.000833057	chr9	100047137	OpenSea	Body;Body;Body;Body
cg01679512	ADPRHL1	-0.349881	0.000834407	chr13	114108652	OpenSea	TSS1500
cg24528880	CAD;CAD	-0.197049	0.000835093	chr2	27462004	OpenSea	Body;Body
cg26016712	STX12	-0.717135	0.000837055	chr1	28098981	N_Shore	TSS1500
cg08094466		0.3144	0.000842054	chr17	72635946	OpenSea
cg17423711	POU2F1;POU2F1	0.292965	0.000846044	chr1	167190178	Island	1stExon;5'UTR
cg26922483		0.401074	0.000847015	chr15	97322838	OpenSea
cg03072697		0.308849	0.000850548	chr4	46510272	OpenSea
cg00457258	INTS1	-0.716317	0.00085366	chr7	1520879	S_Shore	Body
cg23291269	CASC9;CASC9;CASC9	-1.05142	0.000859168	chr8	76169640	OpenSea	Body;Body;Body
cg00112026	MAPT;MAPT;MAPT;MAPT;MAPT;MAPT;MAPT;MAPT	0.275819	0.000861068	chr17	44033451	OpenSea	5'UTR;5'UTR;5'UTR;5'UTR;5'UTR;5'UTR;5'UTR;5'UTR
cg12990411		0.785401	0.000863335	chr4	22119459	OpenSea
cg09754081	NDFIP1	-0.413641	0.000863519	chr5	141523617	OpenSea	Body
cg21914984	CDC42EP3	0.472207	0.000870707	chr2	37899464	Island	TSS200
cg03541853	TMCC1;TMCC1;TMCC1	0.249859	0.000874363	chr3	129408948	OpenSea	Body;TSS1500;Body
cg03919734		-0.611462	0.000880859	chr4	68752169	OpenSea
cg05762256		-0.944839	0.000882513	chr6	161187801	N_Shore
cg04346127		0.260065	0.00088867	chr14	23590238	OpenSea
cg08645998		-0.553864	0.000888676	chr6	26572139	OpenSea
cg19632026	CHCHD3	0.327206	0.000889865	chr7	132766999	Island	TSS200
cg13985482		-0.307037	0.000891075	chr4	74749233	OpenSea
cg18323210	ILDR2	-0.324597	0.000894499	chr1	166944395	N_Shore	Body
cg25013550	PPAP2A;PPAP2A;PPAP2A;RNF138P1;PPAP2A	0.609983	0.000895741	chr5	54830529	Island	5'UTR;1stExon;5'UTR;TSS200;1stExon
cg23708347	ATP5G1;ATP5G1	0.732981	0.000898228	chr17	46969722	Island	TSS1500;TSS1500
cg03752237	NRSN1	0.408891	0.000905437	chr6	24133720	OpenSea	5'UTR
cg04152412	NEGR1	0.591185	0.000908446	chr1	72745785	N_Shelf	Body
cg07941700	NEK4;NEK4	0.555554	0.000909208	chr3	52805103	Island	TSS200;TSS200
cg10929004		0.445753	0.000916353	chr12	53374980	OpenSea
cg05819613	LOC100996634	-0.526667	0.000920371	chr6	109557769	OpenSea	TSS200
cg27065146		-0.328283	0.000922906	chr16	13889203	OpenSea
cg15790037	ARL5C	0.317574	0.000924963	chr17	37321490	Island	Body
cg27308346	SSC5D	0.415124	0.000929121	chr19	56015301	Island	Body
cg12770187	ANKRD26P1	0.630126	0.000931335	chr16	46512538	OpenSea	Body
cg20622087	JAZF1;JAZF1-AS1	-0.345943	0.000933085	chr7	28221156	S_Shore	TSS1500;Body
cg10283690	HNRNPU;HNRNPU	-0.901349	0.000933753	chr1	245027135	Island	1stExon;1stExon
cg08155129	C1orf61	0.56561	0.000936074	chr1	156387951	N_Shelf	5'UTR
cg01250678	SLC12A2;SLC12A2;SLC12A2	-0.225458	0.000940512	chr5	127491418	OpenSea	Body;Body;Body
cg17322935	AKAP9;AKAP9;AKAP9;AKAP9	0.487962	0.000947449	chr7	91570297	Island	5'UTR;1stExon;5'UTR;1stExon
cg00408980	HMBOX1;HMBOX1;HMBOX1;HMBOX1	0.506505	0.000958692	chr8	28821340	OpenSea	ExonBnd;ExonBnd;5'UTR;5'UTR
cg09923796	CLEC4E;CLEC4E	0.435422	0.000958956	chr12	8691893	OpenSea	Body;ExonBnd
cg18379819	TMEM131	0.602022	0.000959434	chr2	98583534	OpenSea	Body
cg05026346		-0.495716	0.00096006	chr7	23057327	S_Shelf
cg05971966	PTGER4	0.249702	0.000963469	chr5	40681137	Island	Body
cg26709693	MAEA;MAEA	-0.752109	0.000968964	chr4	1305780	S_Shore	Body;Body
cg00672930	CCDC26;CCDC26;CCDC26;CCDC26	0.4583	0.000973397	chr8	130585711	OpenSea	Body;Body;Body;Body
cg02171804		-0.485746	0.000977722	chr14	105145974	S_Shore
cg10281521	RHCG;RHCG	-0.723061	0.000977889	chr15	90040046	S_Shore	TSS1500;TSS1500
cg05786836		-0.525917	0.000980873	chr7	12588838	OpenSea
cg10451621	MCPH1	0.265815	0.000988393	chr8	6345256	OpenSea	Body
cg11712735	PSMD8	0.68138	0.000991403	chr19	38865425	Island	1stExon
cg04573482	HN1;HN1;HN1;HN1;HN1;HN1;HN1;HN1	-0.428445	0.000992797	chr17	73149496	N_Shore	5'UTR;5'UTR;1stExon;TSS200;Body;Body;Body;Body
cg14617810	CDC14B;CDC14B	-0.525467	0.000995723	chr9	99382193	Island	TSS200;TSS200
cg04510459		-0.335191	0.000996356	chr1	92048287	OpenSea
cg23487297	IGF2R	-0.667801	0.000997474	chr6	160522792	OpenSea	Body
cg19832721	KIAA1267	0.848248	0.000998156	chr17	44249866	OpenSea	TSS1500
cg19306847	BRMS1;BRMS1	-0.555724	0.000998177	chr11	66111877	N_Shore	5'UTR;5'UTR
cg04394972		0.307214	0.0009982	chr10	92682664	OpenSea
cg16446408	LASS6	0.332046	0.000998691	chr2	169313621	Island	Body
cg26328483	NTRK1;INSRR	-0.578711	0.000999862	chr1	156823867	OpenSea	Body;Body

## Sheet: Whole_Blood_IPA_CNA
Master Regulator	Expr Log Ratio	Molecule Type	Participating regulators	Depth	Predicted Activation	Activation z-score	p-value of overlap	Network bias-corrected p-value	Target Molecules in Dataset	Causal network	Target-connected regulators	Macular degeneration (Length | Paths)
TNFAIP3		enzyme	ERK1/2,IKBKB,IKK (complex),IL1B,IRF3,Jnk,MAP2K1,MYD88,NFkB (complex),RELA,RNF138,TBK1,TNFAIP3	2	Inhibited	-2.357	0.00796	0.0035	AP3M2,CLEC4E,DBP,IER3,LEF1,MAPT,MKI67,MRC2,MYO1D,NEAT1,NMI,NOX5,PHF11,PTGER4,PTPRE,PXN,RAD51C,RPTOR	18 (13)	12
SMAD7		transcription regulator	EGFR,P38 MAPK,RB1,RELA,Smad2/3,SMAD7	2	Inhibited	-2.138	0.043	0.039	AP3M2,CAD,CD82,CHCHD3,DLST,GHITM,GPR63,IER3,LEF1,mir-128,PTGER4,PTPRE,PXN,ZEB2	14 (6)	5
PPP2CA		phosphatase	ERK1/2,FOXO3,IRF3,JAK3,Jnk,JUN,NFkB (complex),P38 MAPK,PPP2CA,RELA,STAT5a/b	2	Inhibited	-2.183	0.0373	0.022	AP3M2,CD82,CDC42EP3,CLEC4E,DBP,HNRNPU,IGF2R,KLHL31,LEF1,LEMD3,MRC2,NOX5,PHF11,PTGER4,PTPRE,PXN,RPTOR	17 (11)	10
DRD4		G-protein coupled receptor	ADCY,Creb,DRD4,DUSP1,ERK1/2,MAPK1,NMDA Receptor,P38 MAPK,PARP1,RELA,STAT5a/b,STK11	3	Inhibited	-2.183	0.0429	0.0385	AP3M2,ATP5MC1,CD82,INTS1,KLHL29,LEF1,MKI67,NELL2,NMI,NOX5,PHF11,POU2F1,PTGER4,PTPRE,PXN,RCAN3,SH2D2A	17 (12)	9
PRKAB1		kinase	26s Proteasome,AMPK,E2F1,ERK1/2,ERN1,ESR1,FOXO3,FYN,ITGB1,MAPK1,MED1,MKNK1,MTOR,NFkB (complex),NOS1,P38 MAPK,PRKAA1,PRKAA2,PRKAB1,RB1,SIRT1,STAT3	3	Inhibited	-2.263	0.0115	0.0179	ATP5MC1,CAD,CD82,CDC42EP3,CHCHD3,CLEC4E,COBL,COPG2,DLST,FAM186A,GHITM,GPR63,HECW2,IER3,ISLR2,KLHL29,LAMP1,LEMD3,LRCH1,MAPT,MKI67,NELL2,NMI,NOX5,NTRK1,PHF11,PTPRE,RCAN3,SIDT1,SLC12A2,STX12,TMCC1,ZEB2	33 (22)	19
ADRA1B		G-protein coupled receptor	ADRA1B,CEBPA,CEBPB,Creb,EGFR,ERK1/2,ESR1,FOXO1,GATA1,H/K/NRAS,Hsp27,IKBKB,IKK (complex),IRF3,KRAS,LIN28A,MAP2K7,MAPK14,MAPK3,MED1,MTOR,NFE2L2,NOS2,NR4A1,NRAS,PI3K (complex),PRKAA1,RB1,RELA,Rsk,SP1,STAT3,TP53,TSC2	3	Inhibited	-2.021	0.00566	0.0305	ANXA6,AP3M2,ATP5MC1,CAD,CAMK1,CDK5RAP3,CERS6,CHCHD3,COBL,COPG2,CSMD3,DLST,FAM186A,FUS,GABRA1,GHITM,HECW2,INTS1,ISLR2,JAZF1,JPT1,KCNQ3,KLHL29,LEF1,MAP2K4,MAPT,mir-128,MYO1D,NPR3,NRSN1,NTRK1,PSMC3,PSMD8,PTGER4,PTPRE,RAD51C,RPA3,RPL7,RPTOR,S100A13,SFXN1,STX12,TBXAS1,TMCC1,TRAP1,TRIM11,WIF1,ZNF366	48 (34)	29
NAT2		enzyme	CREB1,ERK1/2,IKBKB,INSR,Jnk,MAPK1,NANOG,NAT2,NFkB (complex),P38 MAPK,Pkc(s),PRKCD,PRKCE,PRKCQ,RB1,RELA,STAT3	3	Inhibited	-2.646	0.00251	0.0021	AP3M2,ATP5MC1,CD82,CERS6,CHCHD3,CLEC4E,COBL,COPG2,DBP,DLST,FUS,GHITM,GPR63,IER3,IGF2R,LAMP1,LEF1,MKI67,MRC2,MYO1D,NMI,NOX5,PHF11,PTGER4,PTPRE,PXN,RCAN3,ZEB2	28 (17)	14
ACADL		enzyme	ACADL,AKT2,CREB1,FOXO1,FOXO3,GSK3B,IKBKB,INSR,MAPK1,NANOG,NCF1,NFkB (complex),P38 MAPK,Pkc(s),PRKCD,PRKCE,RB1,RELA,STAT3	3	Inhibited	-2.191	0.00104	0.0006	AP3M2,ATP5MC1,CD82,CDC42EP3,CDK5RAP3,CERS6,CHCHD3,CLEC4E,COBL,COPG2,DBP,DLST,FUS,GHITM,GPR63,HYAL3,IER3,IGF2R,LAMP1,LEF1,LEMD3,MKI67,MYO1D,NMI,NOX5,PHF11,PTGER4,PXN,RCAN3,ZEB2	30 (19)	16
ARHGEF12		other	APP,AR,ARHGEF12,CaMKII,Cdc42,CEBPA,CEBPB,DUSP1,EGFR,EIF4E,EP300,F2R,FOXO1,IKK (complex),Jnk,KAT5,LIN28A,MAPK1,MAPK3,MITF,MKNK1,MTOR,NFAT5,NFE2L2,P38 MAPK,PAK2,PARP1,PPARG,PPARGC1A,RAF1,RARA,RB1,RHOA,RICTOR,Smad2/3,STAT3,STAT6,TP53	3	Inhibited	-2.1	0.00187	0.0188	ANXA6,ATP5MC1,CAD,CD82,CDK5RAP3,CERS6,CHCHD3,COBL,COPG2,COX7A2L,CSMD3,DLST,FAM186A,FUS,GABRA1,GHITM,HECW2,IER3,ILDR2,ISLR2,JPT1,LAMP1,LEMD3,MAPT,mir-128,MKI67,MRC2,NMI,NOX5,NRSN1,PHF11,PITRM1,POU2F1,PSMC3,PSMD8,PTPRE,RAD51C,RCAN3,RPA3,S100A13,SH2D2A,SMAD9,STX12,TBXAS1,TMCC1,TMEM131,TRAP1,UBE4A,VAMP5,ZEB2,ZNF608	51 (38)	32
FCGR3A/FCGR3B		transmembrane receptor	FCGR3A/FCGR3B,PLCG2,SYK	2	Activated	2	0.0174	0.0098	KLHL31,MAPT,NOX5,PTPRE	4 (3)	2
TNFSF10		cytokine	ERK1/2,IKK (complex),Jnk,JUN,MAPK1,NFkB (complex),P38 MAPK,PARP1,RELA,TNFSF10	2	Activated	2.236	0.00621	0.003	AP3M2,CD82,CLEC4E,DBP,HNRNPU,IER3,IGF2R,LEF1,MKI67,MRC2,NELL2,NMI,NOX5,PHF11,POU2F1,PTGER4,PTPRE,PXN,RAD51C,RCAN3	20 (10)	9
PRKCE		kinase	CREB1,IKBKB,INSR,MAPK1,NANOG,NFkB (complex),P38 MAPK,Pkc(s),PRKCD,PRKCE,RB1,RELA,STAT3	2	Activated	2.746	0.00473	0.004	AP3M2,ATP5MC1,CD82,CERS6,CHCHD3,CLEC4E,COBL,COPG2,DBP,DLST,FUS,GHITM,GPR63,IER3,IGF2R,LAMP1,LEF1,MKI67,MYO1D,NMI,NOX5,PHF11,PTGER4,PXN,RCAN3,ZEB2	26 (13)	12
RAF1		kinase	ERK1/2,FOXO1,IKBKB,MAPK1,P38 MAPK,Pkc(s),RAF1,RB1,RELA	2	Activated	2.558	0.00361	0.0015	AP3M2,CD82,CDC42EP3,CDK5RAP3,CHCHD3,DBP,DLST,GHITM,GPR63,IER3,LEF1,LEMD3,MKI67,MYO1D,NMI,NOX5,PHF11,PTGER4,PTPRE,PXN,RCAN3,ZEB2	22 (9)	8
GCA		other	GCA,NFkB (complex),P38 MAPK,RELA	2	Activated	2.121	0.0936	0.0374	AP3M2,CD82,CLEC4E,DBP,IER3,LEF1,PTGER4,PXN	8 (4)	3
IKBKG		kinase	ERK1/2,IKBKB,IKBKG,IRF3,IRF7,MAP2K1,NFkB (complex),P38 MAPK,RELA	2	Activated	2.496	0.0928	0.0451	AP3M2,CD82,CLEC4E,DBP,IER3,LEF1,MYO1D,NOX5,PHF11,PTGER4,PTPRE,PXN,RPTOR	13 (9)	8
F2RL1		G-protein coupled receptor	ERK1/2,F2RL1,JUN,NFkB (complex),RELA,YAP1	2	Activated	2.714	0.0876	0.0387	AP3M2,CDC42EP3,CLEC4E,DBP,HNRNPU,IER3,IGF2R,LEF1,PTGER4,PTPRE,PXN	11 (6)	5
HNF1A		transcription regulator	C5,Creb,GSTA1,HNF1A,Jnk,MAPK14,NFkB (complex),P38 MAPK,PARP1,PPARG,STAT5a/b	3	Activated	2	0.0481	0.0375	CD82,CLEC4E,DBP,GMDS,IER3,INTS1,LEF1,MELTF,MRC2,NELL2,NOX5,POU2F1,PXN,TBXAS1,VAMP5,WIF1	16 (11)	9
RPS6KA1		kinase	BCL2L11,CASP8,CHEK1,Creb,CREB1,CTNNB1,E2F3,ERK1/2,IRF3,NFkB (complex),P38 MAPK,Pka catalytic subunit,PPARG,RELA,RPS6KA1,STAT6,TBK1,VASP,XBP1	3	Activated	2.449	0.0425	0.0462	AP3M2,CD82,CDK5RAP3,CLEC4E,DBP,IER3,IGF2R,INTS1,LEF1,MKI67,NEAT1,NMI,NOX5,PHF11,PTGER4,PTPRE,PXN,RPTOR,TBXAS1,TMEM131,VAMP5,WIF1,ZEB2,ZNF608	24 (19)	13
PIM3		kinase	AMPK,CEBPA,ERK1/2,ERN1,FOXO3,IKBKB,IKK (complex),Jnk,MAPK1,MED1,MKNK1,NFkB (complex),PIM3,PRKAA2,RB1,RELA,TP53,YAP1	3	Activated	2	0.0216	0.0386	ANXA6,AP3M2,ATP5MC1,CAD,CD82,CDC42EP3,CERS6,CHCHD3,CLEC4E,CSMD3,DBP,GHITM,GPR63,HECW2,IER3,KLHL29,LEF1,LEMD3,mir-128,MRC2,MYO1D,NELL2,NMI,NOX5,PHF11,PSMD8,PTGER4,PTPRE,PTPRU,PXN,RAD51C,RCAN3,RPL7,TBXAS1,TRAP1,ZEB2	36 (18)	16
ALDH3A1		enzyme	26s Proteasome,ALDH3A1,CCND1,EGFR,FOXO3,JUN,MAPK1,NFkB (complex),RB1,RELA,STAT3,TP53	3	Activated	2.058	0.0155	0.0249	AHI1,ANXA6,AP3M2,ATP5MC1,CAD,CD82,CERS6,CHCHD3,CLEC4E,COBL,COPG2,CSMD3,DLST,GHITM,GPR63,HNRNPU,IGF2R,JPT1,LAMP1,LEF1,LEMD3,mir-128,NMI,NOX5,PHF11,PSMD8,PTGER4,PTPRU,PXN,RCAN3,RPL7,TRAP1,WWOX,ZEB2	34 (12)	11
CDK5R2		other	APP,AR,Calcineurin protein(s),CDK5,CDK5R2,ERBB2,GSK3B,ITGB1,JUN,MAPK1,MTOR,Nr1h,NR3C1,PPARG,RELA,TP53,TP73	3	Activated	2.343	0.0045	0.0118	ANXA6,AP3M2,ARL5C,ATP5MC1,CD82,CDC14B,CDC42EP3,CERS6,CLEC4E,CSMD3,GPR63,HLA-DOB,HNRNPU,IER3,IGF2R,ILDR2,ISLR2,KCNQ3,LAMP1,LEF1,MAPT,mir-128,MKI67,NMI,NTRK1,PHF11,PITRM1,PSMD8,PTGER4,PTPRU,PXN,RCAN3,RPL7,SIDT1,SLC12A2,STX12,TBXAS1,TMCC1,TRAP1,VAMP5,ZEB2	41 (17)	15
DGAT2		enzyme	CREB1,DGAT2,ERK1/2,FOXO1,IKBKB,INSR,IRS2,MAPK1,NANOG,NFkB (complex),Pkc(s),PRKCD,PRKCE,RB1,RELA,STAT3	3	Activated	2.268	0.00368	0.0043	AP3M2,ATP5MC1,CDC42EP3,CDK5RAP3,CERS6,CHCHD3,CLEC4E,COBL,COPG2,DBP,DLST,FUS,GHITM,GPR63,IGF2R,LAMP1,LEF1,LEMD3,MKI67,MYO1D,NMI,NOX5,PHF11,PTGER4,PTPRE,PXN,RCAN3,ZEB2	28 (16)	13
GSK3A		kinase	Akt,CCND1,CDKN1B,CEBPA,CEBPB,Creb,DUSP1,EGR1,EIF4E,ERK,EZH2,FOXO1,GSK3A,IKBKB,IKK (complex),IRF3,JUN,KAT5,MAPK9,MAPT,MTOR,MYC,NFAT5,NFkB (complex),NOS2,PAX6,PPARG,PPARGC1A,RB1,RXRA,SP1,STAT3,TSC2	3	Activated	2.16	0.00252	0.0084	AHI1,CAD,CDK5RAP3,CHCHD3,CLEC4E,COBL,COPG2,DBP,GHITM,HDGFL3,HECW2,HNRNPU,IER3,IGF2R,INTS1,ISLR2,JPT1,KCNQ3,MAPT,MKI67,MYO1D,NMI,NTRK1,PHF11,PSMC3,PXN,RAD51C,RPA3,RPL7,RPTOR,RTN2,SEMA5A,SFXN1,SH2D2A,SLC12A2,STX12,TBXAS1,TMCC1,TMEFF2,UBE4A,VAMP5,WWOX	42 (33)	29
ACACB		enzyme	ACACB,AKT2,CREB1,ERK1/2,FOXO1,FOXO3,GSK3B,IKBKB,INSR,Jnk,MAPK1,NANOG,NCF1,NFkB (complex),P38 MAPK,Pkc(s),PRKCD,PRKCE,PRKCQ,RB1,RELA,STAT3	3	Activated	2.121	0.000753	0.0008	AP3M2,ATP5MC1,CD82,CDC42EP3,CDK5RAP3,CERS6,CHCHD3,CLEC4E,COBL,COPG2,DBP,DLST,FUS,GHITM,GPR63,HYAL3,IER3,IGF2R,LAMP1,LEF1,LEMD3,MKI67,MRC2,MYO1D,NMI,NOX5,PHF11,PTGER4,PTPRE,PXN,RCAN3,ZEB2	32 (22)	18
NCF1		enzyme	NCF1	1		1	0.176	0.0459	HYAL3	1 (1)	1
TRAF3IP3		other	TRAF3IP3	1		1	0.121	0.0397	MKI67	1 (1)	1
BAG1		other	BAG1	1		-1	0.121	0.0431	MAPT	1 (1)	1
MEG3		other	MEG3	1		-1	0.121	0.0464	ZEB2	1 (1)	1
MAP2K7		kinase	MAP2K7	1		1	0.113	0.0474	MAP2K4	1 (1)	1
OGG1		enzyme	OGG1	1		-1	0.104	0.0303	CAD	1 (1)	1
SNHG20		other	SNHG20	1		-1	0.0962	0.0269	ZEB2	1 (1)	1
HOXA11-AS		other	HOXA11-AS	1		-1	0.0879	0.0217	ZEB2	1 (1)	1
LAIR1		transmembrane receptor	LAIR1	1		-1	0.0879	0.0372	CAMK1	1 (1)	1
CD80/CD86		group	CD80/CD86	1		-1	0.0794	0.0328	MKI67	1 (1)	1
NOD2		other	NOD2	1		1.414	0.0794	0.0315	ARL5C,CLEC4E	2 (1)	1
NPPA		other	NPPA	1		1	0.0709	0.0395	NPR3	1 (1)	1
PIAS4		transcription regulator	PIAS4	1		1	0.0709	0.0266	LEF1	1 (1)	1
mir-205		microRNA	mir-205	1		1	0.0709	0.0437	ZEB2	1 (1)	1
S100a7a		other	S100a7a	1		-1	0.0709	0.0292	MKI67	1 (1)	1
FOXO4		transcription regulator	FOXO4	1		-0.577	0.0657	0.0395	CDC42EP3,IER3,LEMD3	3 (1)	1
mir-192		microRNA	mir-192	1		1	0.0623	0.0421	ZEB2	1 (1)	1
PHIP		other	PHIP	1		1	0.0623	0.0326	PXN	1 (1)	1
OXSR1		kinase	OXSR1	1		-1	0.0623	0.0471	SLC12A2	1 (1)	1
DEK		transcription regulator	DEK	1		1	0.0623	0.0425	LEF1	1 (1)	1
miR-491-5p (and other miRNAs w/seed GUGGGGA)		mature microRNA	miR-491-5p (and other miRNAs w/seed GUGGGGA)	1		-1	0.0623	0.0264	PXN	1 (1)	1
LGR4		transmembrane receptor	LGR4	1		0	0.0589	0.0359	LEF1,ZEB2	2 (1)	1
SYK		kinase	SYK	1		-1.732	0.0553	0.0363	KLHL31,MAPT,PTPRE	3 (1)	1
MTOR		kinase	MTOR	1		-0.447	0.0546	0.0248	ISLR2,MAPT,SLC12A2,STX12,TMCC1	5 (1)	1
SIRT6		enzyme	SIRT6	1		0	0.0541	0.0216	DBP,IGF2R	2 (1)	1
Fcgr3		group	Fcgr3	1		-1	0.0537	0.033	LAMP1	1 (1)	1
PTBP3		other	PTBP3	1		-1	0.0537	0.0168	ZEB2	1 (1)	1
ZNRF3		enzyme	ZNRF3	1		-1	0.0537	0.0418	LEF1	1 (1)	1
RAB7B		peptidase	RAB7B	1		1	0.0537	0.0293	IGF2R	1 (1)	1
UFL1		enzyme	UFL1	1		1	0.0537	0.0452	CDK5RAP3	1 (1)	1
HDL-cholesterol		complex	HDL-cholesterol	1		-1.414	0.0495	0.0363	HDGFL3,RPTOR	2 (1)	1
PANX1		transporter	PANX1	1		1	0.0449	0.035	LEF1	1 (1)	1
miR-873-5p (and other miRNAs w/seed CAGGAAC)		mature microRNA	miR-873-5p (and other miRNAs w/seed CAGGAAC)	1		1	0.0449	0.0214	MKI67	1 (1)	1
NCK2		kinase	NCK2	1		1	0.0449	0.0274	PXN	1 (1)	1
LCP2		other	LCP2	1		-1	0.0449	0.0382	LAMP1	1 (1)	1
mir-342		microRNA	mir-342	1		1	0.0449	0.0412	PTPRN2	1 (1)	1
Sox2ot		other	Sox2ot	1		1	0.0449	0.0402	MKI67	1 (1)	1
IgG2b		complex	IgG2b	1		1	0.0449	0.0053	MAPT	1 (1)	1
miR-487b-3p (miRNAs w/seed AUCGUAC)		mature microRNA	miR-487b-3p (miRNAs w/seed AUCGUAC)	1		1	0.0449	0.047	MAP2K4	1 (1)	1
CEBPB		transcription regulator	CEBPB	1		0	0.0434	0.0268	CDC42EP3,CLEC4E,IER3,JPT1,LEMD3,MKI67,RPA3,SLC12A2	8 (1)	1
DOCK5		other	DOCK5	1		1	0.0361	0.032	RPTOR	1 (1)	1
TCF		group	TCF	1		1	0.0361	0.0172	LEF1	1 (1)	1
AGRN		other	AGRN	1		-1	0.0361	0.0277	MAPT	1 (1)	1
AKAP5		other	AKAP5	1		-1	0.0361	0.0328	KCNQ3	1 (1)	1
BLOC1S6		other	BLOC1S6	1		-1	0.0361	0.0443	STX12	1 (1)	1
VGLL4		other	VGLL4	1		-1	0.0361	0.0171	LEF1	1 (1)	1
Cathepsin		group	Cathepsin	1		1	0.0361	0.0118	MKI67	1 (1)	1
GIT1		kinase	GIT1	1		1	0.0361	0.0154	PXN	1 (1)	1
MTBP		other	MTBP	1		-1	0.0361	0.0331	CAD	1 (1)	1
ADRA2B		G-protein coupled receptor	ADRA2B	1		1	0.0361	0.0343	MKI67	1 (1)	1
SSTR5		G-protein coupled receptor	SSTR5	1		-1	0.0361	0.0278	MKI67	1 (1)	1
FRK		kinase	FRK	1		1	0.0272	0.0189	NTRK1	1 (1)	1
HMGN2		other	HMGN2	1		-1	0.0272	0.0259	IER3	1 (1)	1
ESRP2		other	ESRP2	1		1	0.0272	0.0168	ZEB2	1 (1)	1
NHLRC1		enzyme	NHLRC1	1		-1	0.0272	0.0207	LAMP1	1 (1)	1
AMFR		transmembrane receptor	AMFR	1		-1	0.0272	0.0329	CD82	1 (1)	1
mir-541		microRNA	mir-541	1		1	0.0272	0.0201	PTPRN2	1 (1)	1
EPM2A		phosphatase	EPM2A	1		-1	0.0272	0.0166	LAMP1	1 (1)	1
SMCR8		other	SMCR8	1		1	0.0272	0.0062	LAMP1	1 (1)	1
EXOC7		transporter	EXOC7	1		1	0.0272	0.0105	ZEB2	1 (1)	1
LILRB4		other	LILRB4	1		0	0.027	0.0171	CLEC4E,PTPN22	2 (1)	1
KLF5		transcription regulator	KLF5	1		0.577	0.0218	0.0102	JAZF1,NEGR1,NMI	3 (1)	1
HSPA9		other	HSPA9	1		0	0.0186	0.0095	NTRK1,RPL7	2 (1)	1
EDA		cytokine	EDA	1		-1	0.0182	0.0118	MKI67	1 (1)	1
SPAG9		other	SPAG9	1		-1	0.0182	0.0076	FOXK1	1 (1)	1
SYNPO		other	SYNPO	1		-1	0.0182	0.0151	MAPT	1 (1)	1
SLC32A1		transporter	SLC32A1	1		1	0.0182	0.0183	GABRA1	1 (1)	1
CERS4		transcription regulator	CERS4	1		-1	0.0182	0.0207	CERS6	1 (1)	1
TIAM1		other	TIAM1	1		1	0.0182	0.0119	LEF1	1 (1)	1
IPO9		other	IPO9	1		-1	0.0182	0.0223	PXN	1 (1)	1
NAGLU		enzyme	NAGLU	1		1	0.0182	0.0105	MAPT	1 (1)	1
MYOF		other	MYOF	1		-1	0.0182	0.0183	LAMP1	1 (1)	1
MYO9B		enzyme	MYO9B	1		1	0.0182	0.0145	SH2D2A	1 (1)	1
RPL10		translation regulator	RPL10	1		1	0.0182	0.0168	LEF1	1 (1)	1
ABL1		kinase	ABL1	1		0	0.0171	0.0101	IER3,NOX5	2 (1)	1
IRF4		transcription regulator	IRF4	1		1	0.0164	0.0066	AP3M2,LEF1,PHF11,PTGER4	4 (1)	1
Rhox5		transcription regulator	Rhox5	1		0	0.0156	0.0153	JAZF1,PTPRU	2 (1)	1
RICTOR		other	RICTOR	1		-0.378	0.0154	0.0203	ATP5MC1,COX7A2L,PHF11,PSMC3,PSMD8,PXN,RPL7	7 (1)	1
AURKB		kinase	AURKB	1		0	0.0142	0.0106	CD82,IER3	2 (1)	1
NT5E		phosphatase	NT5E	1		1.414	0.0129	0.0022	MKI67,ZNF366	2 (1)	1
mir-218		microRNA	mir-218	1		0	0.0116	0.0076	LEF1,ZEB2	2 (1)	1
Fus		transcription regulator	Fus	1		1.414	0.0116	0.0178	AHI1,BPHL	2 (1)	1
AMH		growth factor	AMH	1		-1.414	0.0116	0.0075	IER3,SMAD9	2 (1)	1
PDLIM2		other	PDLIM2	1		0	0.0098	0.0124	HLA-DOB,NPR3,RTN2,WWOX	4 (1)	1
Bex3		other	Bex3	1		-1	0.00915	0.0095	NTRK1	1 (1)	1
CTD_2140G102		other	CTD_2140G102	1		1	0.00915	0.0137	SLC17A6	1 (1)	1
GEMIN7		other	GEMIN7	1		1	0.00915	0.0084	SNRPE	1 (1)	1
WNK3		kinase	WNK3	1		-1	0.00915	0.0104	SLC12A2	1 (1)	1
CHMP3		other	CHMP3	1		1	0.00915	0.0118	IGF2R	1 (1)	1
FBXO46		other	FBXO46	1		1	0.00915	0.0153	FBXO31	1 (1)	1
MTARC2		enzyme	MTARC2	1		-1	0.00915	0.0078	MTARC1	1 (1)	1
SP6		transcription regulator	SP6	1		-1	0.00915	0.0119	LEF1	1 (1)	1
VCX/VCX3A		other	VCX/VCX3A	1		1	0.00915	0.0158	CAMK1	1 (1)	1
mir-654		microRNA	mir-654	1		1	0.00915	0.0106	PTPRN2	1 (1)	1
RUNX1T1		transcription regulator	RUNX1T1	1		-1	0.00915	0.0095	NTRK1	1 (1)	1
KLRC4-KLRK1/KLRK1		transmembrane receptor	KLRC4-KLRK1/KLRK1	1		0	0.00809	0.003	LAMP1,LEF1	2 (1)	1
IQGAP2		other	IQGAP2	1		-1.414	0.00608	0.0051	LEF1,WIF1	2 (1)	1
RILP		other	RILP	1		1.414	8.33e-05	0.0001	IGF2R,LAMP1	2 (1)	1
TICAM1		other	ERK1/2,IFNB1,IL1B,IL6,IRF3,MAPK14,NFkB (complex),P38 MAPK,RELA,TICAM1,TNF	2		1.528	0.0369	0.0306	AP3M2,ARHGEF10L,CD82,CLEC4E,GABRA1,LEF1,MAP2K4,MAPT,MKI67,NEAT1,NMI,PHF11,PLPP1,POU2F1,PTPRE,PXN,RPTOR,SIDT1,SLC12A2,TBXAS1,WIF1	21 (11)	11
PIK3CG		kinase	CEBPB,ERK1/2,MAPK1,NCF1,NFkB (complex),PAK2,PIK3CG,RELA	2		-0.229	0.0362	0.025	AP3M2,CDC42EP3,CLEC4E,DBP,HYAL3,JPT1,LEF1,LEMD3,MKI67,NMI,NOX5,PHF11,PTGER4,PTPRE,RCAN3,RPA3,SLC12A2,SMAD9,ZEB2	19 (8)	7
NCR1		transmembrane receptor	FYN,LCP2,MAPK1,NCR1,PLCG2,SYK	2		-1.667	0.0347	0.0198	KLHL31,LAMP1,MAPT,MKI67,NMI,NOX5,PHF11,PTPRE,RCAN3	9 (6)	5
MLH1		enzyme	MAPK14,MLH1,TP53	2		0.447	0.0346	0.0383	ANXA6,ATP5MC1,CD82,CDC42EP3,CERS6,CSMD3,DBP,DLST,GPR63,IER3,LEF1,mir-128,MKI67,PSMD8,PTPRE,PTPRU,RPL7,TRAP1,WIF1,ZEB2	20 (3)	2
NOP53		other	NOP53,PTEN,TP53	2		-0.447	0.034	0.0364	ANXA6,ATP5MC1,CD82,CDC42EP3,CERS6,CSMD3,DBP,DLST,IER3,mir-128,MKI67,NTRK1,PSMD8,PTPRE,PTPRU,PXN,RAD51C,RPL7,TRAP1,ZEB2	20 (3)	2
CTLA4		transmembrane receptor	CTLA4,Jnk,MAPK1,NFkB (complex),RELA	2		-1.387	0.0333	0.0177	AP3M2,CLEC4E,DBP,IER3,LEF1,MKI67,MRC2,NMI,NOX5,PHF11,PTGER4,PXN,RCAN3	13 (5)	5
PLAAT4		enzyme	IFNB1,IRF3,NFkB (complex),PLAAT4	2		0	0.033	0.0145	CLEC4E,DBP,IER3,NMI,PHF11,PXN,RPTOR,SIDT1	8 (4)	3
FGF9		growth factor	FGF9,MAPK1,MTOR	2		-0.632	0.0329	0.0155	ISLR2,MAPT,MKI67,NMI,NOX5,PHF11,RCAN3,SLC12A2,STX12,TMCC1	10 (3)	2
IFNG		cytokine	EP300,ERK1/2,FYN,GSK3B,IFNG,Irgm1,Jnk,JUN,MAPK14,MTOR,NFkB (complex),NOS2,P38 MAPK,PRKAA1,PRKCD,RELA,STAT3,STAT6,STK11,TP73,VAMP8	2		0	0.0329	0.0373	AP3M2,ARL5C,ATP5MC1,CD82,CDC42EP3,CERS6,CLEC4E,COBL,COPG2,DBP,HLA-DOB,HNRNPU,IER3,ISLR2,LAMP1,MAPT,MKI67,MRC2,NMI,NTRK1,PHF11,PTGER4,PTPRE,SFXN1,SLC12A2,STX12,TBXAS1,TMCC1,TMEM131,WIF1,ZEB2,ZNF608	32 (21)	21
PIK3CA		kinase	ERK1/2,FOXO1,FOXO3,GSK3B,MTOR,PI3K (family),PIK3CA	2		0	0.0322	0.0142	CD82,CDC42EP3,CDK5RAP3,IER3,ISLR2,LEMD3,MAPT,PTPRE,PXN,SLC12A2,STX12,TMCC1	12 (7)	6
ARHGEF12		other	ARHGEF12,EGFR,Jnk,MAPK1,P38 MAPK	2		0.302	0.0322	0.0168	CAD,CD82,IER3,MKI67,MRC2,NMI,NOX5,PHF11,PTPRE,RCAN3,ZEB2	11 (5)	4
MAPK10		kinase	APP,JUN,MAPK10,TP53	2		0.655	0.0317	0.0371	ANXA6,ATP5MC1,CD82,CDC42EP3,CERS6,CSMD3,DBP,DLST,GPR63,HNRNPU,IER3,IGF2R,MAPT,mir-128,MKI67,PSMD8,PTPRE,PTPRU,RPL7,TRAP1,ZEB2	21 (4)	3
YOD1		enzyme	IRF3,NFkB (complex),RELA,YOD1	2		-1.667	0.0313	0.0134	AP3M2,CLEC4E,DBP,IER3,LEF1,PHF11,PTGER4,PXN,RPTOR	9 (4)	3
IGF1		growth factor	CREB1,ERK1/2,estrogen receptor,FOXO1,FOXO3,FOXO4,GSK3B,IGF1,IGF1R,INSR,Mapk,MAPK1,MAPK14,MTOR,NFkB (complex),RB1	2		-0.557	0.0311	0.0355	ATP5MC1,CD82,CDC42EP3,CDK5RAP3,CERS6,CHCHD3,CLEC4E,DBP,DLST,GHITM,GPR63,IER3,ISLR2,LEF1,LEMD3,MAPT,NMI,NOX5,PHF11,PTGER4,PTPRE,PXN,RCAN3,SLC12A2,STX12,TMCC1,TMEFF2,WIF1,ZEB2	29 (16)	16
CD79B		transmembrane receptor	CD79B,LCP2,MAPK1,SYK	2		-1.667	0.031	0.013	KLHL31,LAMP1,MAPT,MKI67,NMI,NOX5,PHF11,PTPRE,RCAN3	9 (4)	3
TXNIP		other	MTOR,NFkB (complex),TXN,TXNIP	2		-0.632	0.0309	0.011	CLEC4E,DBP,IER3,ISLR2,LEF1,MAPT,PXN,SLC12A2,STX12,TMCC1	10 (4)	3
IGF2		growth factor	Creb,CYP19A1,IGF1R,IGF2,INSR,Jnk,JUN,Mapk,MAPK1,MTOR,STAT3	2		-0.447	0.0303	0.0182	ATP5MC1,CERS6,COBL,COPG2,DBP,HNRNPU,IGF2R,INTS1,ISLR2,MAPT,MKI67,MRC2,NMI,NOX5,PHF11,PXN,RCAN3,SLC12A2,STX12,TMCC1	20 (11)	11
PIK3R1		kinase	Cdc42,Creb,CREB1,CTNNB1,EIF4E,ERK1/2,ERN1,FOXO1,IKBKB,Jnk,MKNK1,NFkB (complex),PIK3R1,PLCG2,PTEN,STAT3	2		1.225	0.0303	0.0285	CAD,CDC42EP3,CDK5RAP3,CLEC4E,COBL,COPG2,DBP,GPR63,INTS1,LAMP1,LEF1,LEMD3,MAPT,MKI67,MRC2,MYO1D,NELL2,NOX5,NTRK1,PTPRE,RAD51C,UBE4A,WIF1,ZEB2	24 (16)	15
TCR		complex	CD3,HSF1,IKBKB,IKK (complex),ITGB1,Jnk,JUN,Mapk,MAPK1,MAPK14,MTOR,MYH9,NFkB (complex),P38 MAPK,RELA,SYK,TCR	2		0.784	0.0301	0.0403	AP3M2,CLEC4E,COBL,DBP,HNRNPU,IER3,IGF2R,ISLR2,KLHL31,LAMP1,MAPT,MKI67,MRC2,MYO1D,NOX5,PHF11,PXN,RAD51C,RCAN3,RPL7,SH2D2A,SIDT1,SLC12A2,STX12,TMCC1,WIF1	26 (17)	17
Gpcr		group	EGFR,ERK1/2,FYN,Gpcr,IKBKB,IKK (complex),Jnk,MAPK1,NFkB (complex)	2		0	0.0301	0.0159	CAD,CLEC4E,DBP,IER3,MAPT,MKI67,MRC2,MYO1D,NMI,NOX5,PHF11,PTPRE,PXN,RAD51C,RCAN3,ZEB2	16 (9)	8
GSTK1		enzyme	GSTK1,IRF3,RELA,TBK1	2		-1.134	0.0296	0.0106	AP3M2,LEF1,NMI,PHF11,PTGER4,PXN,RPTOR	7 (4)	3
LY96		transmembrane receptor	LY96,MAPK1,MAPK14,NFkB (complex),TLR4	2		0.277	0.0295	0.011	CERS6,CLEC4E,DBP,HNRNPU,IER3,LEF1,MKI67,NMI,NOX5,PHF11,PXN,RCAN3,WIF1	13 (5)	4
PYCARD		transcription regulator	IRF3,Mapk,NFkB (complex),PYCARD,TBK1,TP53	2		1.043	0.0293	0.0356	ANXA6,ATP5MC1,CD82,CDC42EP3,CERS6,CLEC4E,CSMD3,DBP,DLST,GPR63,IER3,mir-128,MKI67,NMI,PHF11,PSMD8,PTPRE,PTPRU,PXN,RPL7,RPTOR,TRAP1,ZEB2	23 (6)	5
Fcer1		complex	EGR1,Fcer1,IKBKB,Jnk,LCP2,Mapk,MAPK1,MAPK14,NFkB (complex),P38 MAPK,PI3K (family),Pkc(s),PLA2G4A,PLCG2,STAT6,SYK	2		-0.894	0.0285	0.0197	CD82,CLEC4E,DBP,IER3,IGF2R,KLHL31,LAMP1,LEF1,MAPT,MKI67,MRC2,MYO1D,NOX5,PHF11,PXN,RCAN3,SLC12A2,TMEM131,WIF1,ZNF608	20 (16)	15
USP21		peptidase	DDX58,IKBKB,IRF3,NFkB (complex),RELA,USP21	2		-1.265	0.0274	0.0124	AP3M2,CLEC4E,DBP,IER3,LEF1,MYO1D,NMI,PHF11,PTGER4,RPTOR	10 (6)	5
RPS6KA5		kinase	CEBPB,Creb,CREB1,Jnk,JUN,RPS6KA5	2		-0.277	0.0273	0.0172	CDC42EP3,CLEC4E,HNRNPU,IER3,IGF2R,INTS1,JPT1,LEMD3,MKI67,MRC2,NOX5,RPA3,SLC12A2	13 (6)	5
TLR9		transmembrane receptor	IKK (complex),IRF7,Jnk,MAPK14,NFkB (complex),P38 MAPK,RELA,STAT3,SYK,TLR9	2		1.414	0.0272	0.0117	AP3M2,CD82,CERS6,CLEC4E,COBL,COPG2,DBP,GLRX3,IER3,KLHL31,MAPT,MRC2,PHF11,PTGER4,PXN,RAD51C,RPTOR,WIF1	18 (10)	10
PDE3A		enzyme	Creb,MAPK1,PDE3A,TP53	2		-0.209	0.0271	0.0371	ANXA6,ATP5MC1,CD82,CDC42EP3,CERS6,CSMD3,DBP,DLST,GPR63,IER3,INTS1,mir-128,MKI67,NMI,NOX5,PHF11,PSMD8,PTPRE,PTPRU,RCAN3,RPL7,TRAP1,ZEB2	23 (4)	3
PTCH1		transmembrane receptor	GLI1,PTCH1,RELA,SHH	2		-1.732	0.027	0.0208	ANXA6,AP3M2,CAPRIN2,DBP,HNRNPU,IER3,KLK1,LEF1,MKI67,PTGER4,PXN,USP48	12 (4)	3
CD40		transmembrane receptor	CD40,IKBKB,Jnk,MAP2K1,MAPK1,MAPK14,MTOR,NFkB (complex),P38 MAPK,PRKCD,SYK	2		0	0.0267	0.0191	CD82,CLEC4E,DBP,IER3,ISLR2,KLHL31,LAMP1,LEF1,MKI67,MRC2,MYO1D,NMI,NOX5,PHF11,PXN,RCAN3,SLC12A2,STX12,TMCC1,WIF1	20 (11)	10
COPS5		transcription regulator	COPS5,IKK (complex),Jnk,JUN,NFkB (complex),RELA,STAT3,TP53	2		0.378	0.0257	0.041	ANXA6,AP3M2,ATP5MC1,CD82,CDC42EP3,CERS6,CLEC4E,COBL,COPG2,CSMD3,DLST,GPR63,HNRNPU,IGF2R,LEF1,mir-128,MKI67,MRC2,PSMD8,PTGER4,PTPRE,PTPRU,PXN,RAD51C,RPL7,SLC12A2,TRAP1,ZEB2	28 (8)	8
SIGIRR		transmembrane receptor	Jnk,MTOR,NFkB (complex),SIGIRR	2		0	0.0246	0.0061	CLEC4E,DBP,IER3,ISLR2,MAPT,MRC2,PXN,SLC12A2,STX12,TMCC1	10 (4)	3
CXCL8		cytokine	Calcineurin protein(s),CXCL8,EGFR,ERK1/2,MAPK1,PAK2,Pkc(s),RELA	2		0.775	0.0244	0.0115	AP3M2,CAD,DBP,KCNQ3,LEF1,MKI67,NMI,NOX5,PHF11,PTGER4,PTPRE,PXN,RCAN3,SMAD9,ZEB2	15 (8)	7
IL18R1		transmembrane receptor	IL18R1,Jnk,MAPK1,MAPK14,NFkB (complex)	2		0.577	0.024	0.0106	CLEC4E,DBP,IER3,LEF1,MKI67,MRC2,NMI,NOX5,PHF11,PXN,RCAN3,WIF1	12 (5)	4
Map3k7		kinase	ERK1/2,IKK (complex),IRF3,Jnk,JUN,Map3k7,Mapk,NFkB (complex),P38 MAPK,PRKAA1,PRKAA2,RELA	2		1.698	0.0232	0.0133	AP3M2,CD82,CDC42EP3,CLEC4E,DBP,HNRNPU,IER3,IGF2R,KLHL29,LEF1,MRC2,PHF11,PTGER4,PTPRE,PXN,RAD51C,RPTOR	17 (12)	11
H2AX		transcription regulator	H2AX,MAPK1,PARP1,TP53	2		-0.209	0.0231	0.0281	ANXA6,ATP5MC1,CD82,CDC42EP3,CERS6,CSMD3,DBP,DLST,GPR63,IER3,mir-128,NELL2,NMI,NOX5,PHF11,POU2F1,PSMD8,PTPRE,PTPRU,RCAN3,RPL7,TRAP1,ZEB2	23 (4)	3
CYP19A1		enzyme	CDKN1B,Creb,CTNNB1,CYP19A1,FYN,Jnk,MAPK1,MAPK14,PRKAA1,PRKAA2,STAT5B,STAT6,TP53	2		0.539	0.0222	0.0413	ANKS1B,ANXA6,ATP5MC1,CERS6,CSMD3,DBP,DIP2B,DLST,GPR63,IER3,IGF2R,INTS1,KLHL29,MAPT,mir-128,MRC2,NMI,NOX5,PHF11,PSMD8,PTPRE,PTPRU,PXN,RCAN3,RPL7,TMEFF2,TMEM131,TRAP1,WIF1,ZEB2,ZNF608	31 (13)	13
PAK4		kinase	Creb,Jnk,NFkB (complex),PAK4,RELA,TP53	2		1	0.0216	0.028	ANXA6,AP3M2,ATP5MC1,CD82,CDC42EP3,CERS6,CLEC4E,CSMD3,DBP,DLST,GPR63,IER3,INTS1,LEF1,mir-128,MKI67,MRC2,PSMD8,PTGER4,PTPRE,PTPRU,PXN,RPL7,TRAP1,ZEB2	25 (6)	5
UBASH3B		enzyme	NFkB (complex),PLCG2,SYK,UBASH3B	2		0	0.0213	0.0077	CLEC4E,DBP,IER3,KLHL31,MAPT,NOX5,PTPRE,PXN	8 (4)	3
TAB1		enzyme	ERK1/2,Hsp27,IKK (complex),Jnk,JUN,MAPK14,NFkB (complex),P38 MAPK,TAB1	2		1.941	0.0206	0.0076	CD82,CLEC4E,DBP,HNRNPU,IER3,IGF2R,LEF1,MRC2,NTRK1,PTPRE,PXN,RAD51C,WIF1	13 (9)	8
CAMK2G		kinase	CAMK2G,FOXO1,GSK3B,MTOR,NFkB (complex),OGT,STAT3	2		0.5	0.0206	0.0088	CD82,CDC42EP3,CDK5RAP3,CLEC4E,COBL,COPG2,DBP,IER3,ISLR2,LEMD3,MAPT,PXN,SLC12A2,STX12,TMCC1,WIF1	16 (7)	6
PPM1D		phosphatase	Jnk,JUN,MAPK14,P38 MAPK,PPM1D,RELA,TP53	2		-1.4	0.0204	0.023	ANXA6,AP3M2,ATP5MC1,CD82,CDC42EP3,CERS6,CSMD3,DBP,DLST,GPR63,HNRNPU,IER3,IGF2R,mir-128,MKI67,MRC2,PSMD8,PTGER4,PTPRE,PTPRU,PXN,RPL7,TRAP1,WIF1,ZEB2	25 (7)	6
CLEC1B		transmembrane receptor	CLEC1B,PLCG2,SYK	2		-1	0.0191	0.0102	KLHL31,MAPT,NOX5,PTPRE	4 (3)	2
IRAK4		kinase	ERK1/2,IKBKB,IRAK4,IRF7,Jnk,MAPK1,MAPK14,MKNK1,NFkB (complex),P38 MAPK,RELA,STAT3	2		1.342	0.0182	0.0115	AP3M2,CD82,CLEC4E,COBL,COPG2,DBP,IER3,MAPT,MKI67,MRC2,MYO1D,NELL2,NMI,NOX5,PTGER4,PTPRE,PXN,RCAN3,RPTOR,WIF1	20 (12)	11
NCR3		transmembrane receptor	FYN,Jnk,MAPK1,NCR3,NFkB (complex),SYK	2		-0.277	0.0172	0.0086	CLEC4E,DBP,IER3,KLHL31,MAPT,MKI67,MRC2,NMI,NOX5,PHF11,PTPRE,PXN,RCAN3	13 (6)	5
EFHD2		other	EFHD2,PLCG2,SYK	2		-1	0.0169	0.0093	KLHL31,MAPT,NOX5,PTPRE	4 (3)	2
RB1CC1		other	RB1CC1,RELA,TP53	2		-0.426	0.0164	0.0215	ANXA6,AP3M2,ATP5MC1,CD82,CDC42EP3,CERS6,CSMD3,DBP,DLST,GPR63,IER3,LEF1,mir-128,MKI67,PSMD8,PTGER4,PTPRE,PTPRU,PXN,RPL7,TRAP1,ZEB2	22 (3)	2
SIRT3		enzyme	CERS2,ERK1/2,FOXO3,GSK3B,Jnk,MTOR,SIRT3,STK11	2		0	0.0164	0.0064	ATP5MC1,CD82,CDC42EP3,CERS6,IER3,ISLR2,KLHL29,LEMD3,MAPT,MRC2,PTPRE,SLC12A2,STX12,TMCC1	14 (8)	7
PTGS2		enzyme	Cdc42,Creb,CYP19A1,MTOR,PPARG,PTGS2,TP53	2		-1.3	0.0161	0.0221	ANXA6,ATP5MC1,CD82,CDC42EP3,CERS6,CSMD3,DBP,DLST,GPR63,IER3,INTS1,ISLR2,LAMP1,MAPT,mir-128,MKI67,PSMD8,PTGER4,PTPRE,PTPRU,PXN,RPL7,SLC12A2,STX12,TBXAS1,TMCC1,TRAP1,VAMP5,ZEB2	29 (7)	7
GADD45A		other	GADD45A,GSK3B,JUN,MAP2K7,MAPK14,TP53	2		-0.209	0.0157	0.0234	ANXA6,ATP5MC1,CD82,CDC42EP3,CERS6,CSMD3,DBP,DLST,GPR63,HNRNPU,IER3,IGF2R,LEF1,MAP2K4,mir-128,MKI67,PSMD8,PTPRE,PTPRU,RPL7,TRAP1,WIF1,ZEB2	23 (6)	5
RIPK2		kinase	Jnk,MAPK14,NFkB (complex),P38 MAPK,RELA,RIPK2,SYK	2		0.832	0.0148	0.0028	AP3M2,ARL5C,CD82,CLEC4E,DBP,IER3,KLHL31,MAPT,MRC2,PTGER4,PTPRE,PXN,WIF1	13 (7)	7
Hsp27		group	26s Proteasome,AR,EIF4E,Hsp27,MAPK1,P38 MAPK,RELA,TP53	2		1.095	0.0146	0.0286	ANXA6,AP3M2,ATP5MC1,CD82,CDC42EP3,CSMD3,DBP,DLST,GPR63,IER3,ILDR2,LAMP1,LEF1,mir-128,MKI67,NMI,NOX5,NTRK1,PHF11,PITRM1,PSMD8,PTGER4,PTPRE,PTPRU,PXN,RCAN3,RPL7,TRAP1,UBE4A,ZEB2	30 (8)	8
Gsk3		group	Creb,EGFR,Gsk3,IGF1R,MTOR,NFE2L2,PRKCD,STAT3,TFEB,TP53	2		-0.354	0.0146	0.0299	ANXA6,ATP5MC1,CAD,CD82,CDC42EP3,CERS6,COBL,COPG2,CSMD3,DBP,DLST,GABRA1,GPR63,IER3,IGF2R,INTS1,ISLR2,LAMP1,MAPT,mir-128,MKI67,NRSN1,PSMC3,PSMD8,PTPRU,RPL7,S100A13,SLC12A2,STX12,TMCC1,TRAP1,ZEB2	32 (10)	9
PTPN6		phosphatase	CEBPB,CTNNB1,Jnk,JUN,MAPK1,NFAT5,NFkB (complex),P38 MAPK,PTPN6,STAT3,STAT6,SYK	2		0.2	0.014	0.0163	CD82,CDC42EP3,CLEC4E,COBL,COPG2,DBP,HECW2,HNRNPU,JPT1,KLHL31,LEF1,LEMD3,MAPT,MRC2,NMI,NOX5,PHF11,PXN,RCAN3,RPA3,SLC12A2,TMEM131,WIF1,ZEB2,ZNF608	25 (12)	11
CDK5		kinase	APP,AR,Calcineurin protein(s),CDK5,ERBB2,ITGB1,JUN,MAPK1,MTOR,PPARG,TP53	2		1.372	0.014	0.0326	ANXA6,ATP5MC1,CD82,CDC14B,CERS6,CLEC4E,CSMD3,DBP,GPR63,HNRNPU,IER3,IGF2R,ILDR2,ISLR2,KCNQ3,LAMP1,MAPT,mir-128,MKI67,NMI,PHF11,PITRM1,PSMD8,PTPRU,RCAN3,RPL7,SIDT1,SLC12A2,STX12,TBXAS1,TMCC1,TRAP1,VAMP5,ZEB2	34 (11)	10
ITGAM		transmembrane receptor	IRF3,ITGAM,MAPK1,MAPK14,NFkB (complex),P38 MAPK,RELA,STAT3,STAT6,SYK	2		0.894	0.0138	0.0128	AP3M2,CD82,CLEC4E,COBL,COPG2,DBP,IER3,IGF2R,KLHL31,MAPT,MKI67,NOX5,PTGER4,PTPRE,PXN,RCAN3,RPTOR,TMEM131,WIF1,ZNF608	20 (10)	9
MAVS		other	IFNB1,IRF3,IRF7,MAVS,NFkB (complex),RELA	2		0.905	0.0136	0.0041	AP3M2,CLEC4E,DBP,IER3,LEF1,NMI,PHF11,PTGER4,PXN,RPTOR,SIDT1	11 (6)	5
PTEN		phosphatase	AR,Cdc42,CREB1,EGFR,EIF4E,ERK1/2,FOXO1,IGF1R,Jnk,MAPK1,MAPK14,MTOR,PTEN,RELA,STAT3,STAT5a/b,STAT6,TSC2	2		-0.169	0.0134	0.0207	AP3M2,ATP5MC1,CAD,CDC42EP3,CDK5RAP3,CERS6,COBL,COPG2,GPR63,ILDR2,ISLR2,LAMP1,LEF1,LEMD3,MKI67,MRC2,NMI,NOX5,NTRK1,PHF11,PITRM1,PSMC3,PTGER4,PTPRE,PXN,RAD51C,RCAN3,SLC12A2,STX12,TMCC1,TMEM131,UBE4A,WIF1,ZEB2,ZNF608	35 (18)	18
PI3K (family)		group	Creb,ELAVL1,FOXO1,GSK3B,HMGA1,IRF3,MYC,NCL,P38 MAPK,PI3K (family),PPARGC1A,RELA,SP1,SREBF1,STAT3,SYK,TP53	2		0	0.0133	0.027	ANXA6,AP3M2,ATP5MC1,CAD,CD82,CDC42EP3,CDK5RAP3,CERS6,COBL,COPG2,CSMD3,DBP,DLST,GPR63,HNRNPU,INTS1,KCNQ3,KLHL31,LEF1,LEMD3,MAPT,mir-128,MKI67,PHF11,PSMD8,PTGER4,PTPRN2,PTPRU,PXN,RPA3,RPTOR,RTN2,S100A13,SFXN1,TRAP1,UBE4A	36 (17)	17
IKBKE		kinase	ERK1/2,FOXO1,FOXO3,IKBKE,IRF3,MTOR,RELA,TP53	2		1.89	0.0133	0.0187	ANXA6,AP3M2,ATP5MC1,CDK5RAP3,CERS6,CSMD3,DBP,DLST,GPR63,ISLR2,LEF1,LEMD3,MAPT,mir-128,MKI67,PHF11,PSMD8,PTGER4,PTPRE,PTPRU,PXN,RPL7,RPTOR,SLC12A2,STX12,TMCC1,TRAP1,ZEB2	28 (8)	8
Agtr1b		G-protein coupled receptor	Agtr1b,Mapk,MAPK1,RELA	2		1.265	0.0131	0.0047	AP3M2,DBP,LEF1,MKI67,NMI,NOX5,PHF11,PTGER4,PXN,RCAN3	10 (4)	3
CX3CL1		cytokine	Cdc42,CX3CL1,CX3CR1,Jnk,Mapk,MAPK1,MAPK14,P38 MAPK,SYK	2		-1.213	0.0128	0.0077	AHI1,CD82,DBP,IER3,KLHL31,LAMP1,LEF1,MAPT,MKI67,MRC2,NMI,NOX5,PDC,PHF11,PTPRE,RCAN3,WIF1	17 (9)	9
Calcineurin protein(s)		complex	APP,Calcineurin protein(s),Creb,ERK1/2,IKK (complex),Jnk,MYD88,NFATC2,P38 MAPK,RELA,TLR2,TLR4	2		1.5	0.0127	0.0098	AP3M2,CD82,CERS6,HNRNPU,IER3,INTS1,KCNQ3,LEF1,MAPT,MKI67,MRC2,NMI,PTGER4,PTPRE,PXN,RAD51C	16 (12)	12
RELA		transcription regulator	JUN,NFkB (complex),RELA,STAT5a/b,TP53	2		0.784	0.0126	0.0153	ANXA6,AP3M2,ATP5MC1,CD82,CDC42EP3,CERS6,CLEC4E,CSMD3,DBP,DLST,GPR63,HNRNPU,IER3,IGF2R,LEF1,mir-128,MKI67,NOX5,PSMD8,PTGER4,PTPRE,PTPRU,PXN,RPL7,TRAP1,ZEB2	26 (5)	5
ILK		kinase	ERK1/2,GSK3B,ILK,Jnk,MET,MTOR,NFkB (complex),P38 MAPK,RELA,RICTOR,Smad2/3	2		0	0.011	0.0062	AP3M2,ATP5MC1,CD82,CLEC4E,COX7A2L,DBP,IER3,ISLR2,MAPT,mir-128,MRC2,PHF11,PSMC3,PSMD8,PTGER4,PTPRE,PXN,RPL7,SLC12A2,STX12,TMCC1,ZEB2	22 (11)	10
IKBKB		kinase	AR,CTNNB1,GLI1,IKBKB,IKK (complex),Jnk,MTOR,NFkB (complex),RELA,STAT3,TP53,TP73	2		0.493	0.0108	0.0217	ANXA6,AP3M2,ARL5C,ATP5MC1,CAPRIN2,CDC42EP3,CERS6,CLEC4E,COBL,COPG2,CSMD3,DLST,GPR63,HNRNPU,ILDR2,ISLR2,KLK1,MAPT,mir-128,MRC2,MYO1D,NTRK1,PITRM1,PSMD8,PTGER4,PTPRE,PTPRU,PXN,RAD51C,RPL7,SLC12A2,STX12,TMCC1,TRAP1,USP48,WIF1,ZEB2	37 (12)	12
TLR3		transmembrane receptor	ERK1/2,IKBKE,IKK (complex),IRF3,Jnk,NFkB (complex),P38 MAPK,RELA,TBK1,TLR3	2		1.698	0.0108	0.0021	AP3M2,CD82,CLEC4E,DBP,DLST,GLRX3,HNRNPU,IER3,LEF1,MRC2,NMI,PHF11,PTGER4,PTPRE,PXN,RAD51C,RPTOR	17 (10)	10
ERBB3		kinase	EGFR,ERBB2,ERBB3,ERK1/2,MAP2K1,Mapk,MAPK1,MTOR,NDRG1,PGR,PI3K (family),RICTOR	2		0	0.0102	0.0098	ATP5MC1,CAD,CD82,CDC14B,CDC42EP3,CLEC4E,COX7A2L,DBP,IER3,ISLR2,LAMP1,MAPT,MKI67,NMI,NOX5,PSMD8,PTPRE,PXN,RCAN3,RPL7,SLC12A2,STX12,TMCC1,ZEB2	24 (12)	11
CD28		transmembrane receptor	CD28,ERK1/2,IKK (complex),Jnk,LCP2,MAPK1,MAPK14,MTOR,NFkB (complex),P38 MAPK,PIP5K1A,RELA,SP1,STAT3,TCR	2		0.392	0.0101	0.0067	AP3M2,CD82,CLEC4E,COBL,COPG2,DBP,IER3,ISLR2,KCNQ3,LAMP1,MAPT,MKI67,MRC2,NOX5,PHF11,PTGER4,PTPRE,PXN,RAD51C,RCAN3,RPL7,SLC12A2,STX12,TMCC1,WIF1,ZEB2	26 (15)	15
CSF1		cytokine	CCND1,CSF1,CTNNB1,ERK1/2,Jnk,JUN,MAP2K1,MAPK1,NFkB (complex),P38 MAPK,PLCG2,STAT5a/b,SYK	2		1.043	0.00993	0.0087	AHI1,CD82,CLEC4E,DBP,HNRNPU,IER3,IGF2R,JPT1,KLHL31,LAMP1,LEF1,MAPT,MKI67,MRC2,NMI,NOX5,PHF11,PTPRE,PXN,RCAN3,WIF1,WWOX,ZEB2	23 (13)	13
IL1B		cytokine	CEBPB,Creb,EGFR,ERK1/2,GSK3B,Hsp27,IGF1R,IKBKB,IKK (complex),IL1B,INSR,Jnk,JUN,MAP2K7,Mapk,MAPK1,MAPK14,NFkB (complex),NOS2,P38 MAPK,PRKCD,PTGS2,RELA,STAT3,STAT5a/b	2		0	0.0098	0.0113	AP3M2,ATP5MC1,CD82,CDC42EP3,CERS6,CLEC4E,COBL,COPG2,DBP,HNRNPU,INTS1,JPT1,LAMP1,LEMD3,MAP2K4,MAPT,MKI67,MRC2,MYO1D,NEAT1,NMI,NOX5,NTRK1,PHF11,PTGER4,PTPRE,PXN,RAD51C,RCAN3,RPA3,SFXN1,SLC12A2,WIF1,ZEB2	34 (25)	25
Interferon alpha		group	EIF3A,EIF4E,Interferon alpha,IRF3,Jnk,MAPK1,MKNK1,MTOR,NFkB (complex),P38 MAPK,Pkc(s),RB1,SKP2,STAT3	2		1.569	0.00974	0.0087	CD82,CHCHD3,CLEC4E,COBL,COPG2,DBP,DLST,GHITM,GPR63,IER3,ISLR2,MAPT,MKI67,MRC2,NELL2,NMI,PHF11,PXN,RCAN3,RPA3,RPTOR,SLC12A2,STX12,TMCC1,UBE4A,ZEB2	26 (14)	14
FLNA		other	Cdc42,FLNA,ITGB1,Jnk,MAP2K7,PLCG2,SYK	2		-0.333	0.00972	0.0028	KLHL31,LAMP1,MAP2K4,MAPT,MRC2,NOX5,PTPRE,PXN,SIDT1	9 (7)	7
TRAF6		enzyme	Creb,ERK1/2,EZH2,IKBKB,IKK (complex),IRF7,Jnk,MAPK14,MTOR,MYD88,NFkB (complex),P38 MAPK,RELA,TRAF6	2		1.964	0.00961	0.0054	AP3M2,CLEC4E,DBP,HDGFL3,IER3,INTS1,ISLR2,MAPT,MKI67,MRC2,MYO1D,PHF11,PTGER4,PTPRE,PXN,RAD51C,RPTOR,SLC12A2,STX12,TMCC1,WIF1	21 (14)	13
ASPSCR1-TFE3		fusion gene/product	ASPSCR1-TFE3,MTOR	2		-0.707	0.00935	0.0047	IGF2R,ISLR2,LAMP1,MAPT,PXN,SLC12A2,STX12,TMCC1	8 (2)	2
LMNA		other	LMNA,MTOR,NFkB (complex),TP53	2		-1	0.00928	0.0126	ANXA6,ATP5MC1,CD82,CDC42EP3,CERS6,CLEC4E,CSMD3,DBP,DLST,GPR63,IER3,ISLR2,MAPT,mir-128,MKI67,PSMD8,PTPRE,PTPRU,PXN,RPL7,SLC12A2,STX12,TMCC1,TRAP1,ZEB2	25 (4)	3
Akt		group	Akt,CDKN1B,EP300,ERK1/2,EZH2,FOXO1,FOXO3,IRF3,Jnk,JUN,MTOR,NFAT5,NFkB (complex),PPARGC1A,RB1,RELA,SP1,STAT3,STAT5a/b,TSC2	2		-0.539	0.00927	0.0121	AP3M2,CDC42EP3,CDK5RAP3,CHCHD3,CLEC4E,COBL,COPG2,DBP,DLST,GHITM,GPR63,HDGFL3,HECW2,HNRNPU,IGF2R,ISLR2,KCNQ3,LEMD3,MAPT,MRC2,NOX5,PHF11,PSMC3,PTGER4,PTPRE,PXN,RPA3,RPTOR,STX12,TMCC1,TMEFF2	31 (20)	19
F2		peptidase	ERK1/2,F2,Hsp27,Jnk,MAPK1,MAPK14,NFkB (complex),P38 MAPK,PAK2,PRKAA1,PRKCD,SLC9A1	2		-0.894	0.00903	0.0054	CD82,CDC42EP3,CLEC4E,DBP,HYAL3,KLHL29,LAMP1,LEF1,MKI67,MRC2,NMI,NOX5,NTRK1,PHF11,PTPRE,RCAN3,SLC12A2,SMAD9,WIF1,ZEB2	20 (12)	12
PI3K (complex)		complex	ERK1/2,FOXO1,FOXO3,Hsp27,IKBKB,IRF3,Jnk,KRAS,MAP2K1,MAPK1,NFkB (complex),NOS2,NRAS,OXSR1,PI3K (complex),RB1,RELA,SP1,STAT3,STAT5a/b	2		-0.365	0.00862	0.0091	AP3M2,CAMK1,CDC42EP3,CDK5RAP3,CHCHD3,CLEC4E,COBL,COPG2,DBP,DLST,GHITM,GPR63,KCNQ3,LEF1,LEMD3,MKI67,MRC2,MYO1D,NMI,NOX5,NPR3,NTRK1,PTGER4,PTPRE,PXN,RCAN3,RPTOR,SFXN1,SLC12A2,TRIM11	30 (20)	19
PDLIM2		other	GLI1,IRF3,IRF7,JUN,NFkB (complex),NR3C1,PDLIM2,RELA,SMAD4,TP53,TRIM24	2		-0.707	0.00855	0.0164	AP3M2,ATP5MC1,CAPRIN2,CD82,CDC42EP3,CERS6,CLEC4E,CSMD3,DLST,GPR63,HLA-DOB,HNRNPU,IGF2R,KLK1,LEF1,LEMD3,mir-128,MKI67,NMI,NPR3,PHF11,PSMD8,PTGER4,PTPRE,PTPRU,RPL7,RPTOR,RTN2,TRAP1,USP48,WWOX,ZEB2	32 (11)	11
IL1A		cytokine	CEBPB,ERK1/2,IKBKE,IKK (complex),IL1A,Jnk,MAPK14,NFkB (complex),P38 MAPK,RELA,TBK1	2		0.894	0.00816	0.004	AP3M2,CD82,CDC42EP3,CLEC4E,DBP,DLST,IER3,JPT1,LEMD3,MKI67,MRC2,NMI,PTGER4,PTPRE,PXN,RAD51C,RHCG,RPA3,SLC12A2,WIF1	20 (11)	11
SRC		kinase	CDH1,Creb,CTNNB1,EGFR,EIF4E,IKBKB,ITGB1,Jnk,MAP2K1,Mapk,MAPK1,MKNK1,NFkB (complex),P38 MAPK,PRKCD,RB1,RELA,SRC,STAT3,STAT5a/b,STAT6,SYK,YAP1	2		-0.343	0.00805	0.0122	AP3M2,CAD,CD82,CDC42EP3,CHCHD3,CLEC4E,COBL,COPG2,DBP,DLST,GHITM,GPR63,IER3,IGF2R,INTS1,KLHL31,LAMP1,LEF1,MAPT,MKI67,MRC2,MYO1D,NELL2,NOX5,PHF11,PTGER4,PXN,RCAN3,RPTOR,SIDT1,TMEM131,UBE4A,WIF1,ZNF608	34 (23)	22
Jnk		group	APP,AR,FOXO1,IKBKB,Jnk,JUN,MTOR,NFE2L2,NFkB (complex),PLA2G4A,RICTOR,Smad2/3,SP1,STAT6,TCF,TP53,YAP1	2		0.16	0.00762	0.021	ANXA6,ATP5MC1,CDC42EP3,CDK5RAP3,CERS6,CLEC4E,COX7A2L,CSMD3,DBP,DLST,GABRA1,GPR63,HNRNPU,ILDR2,ISLR2,KCNQ3,LEF1,LEMD3,MAPT,mir-128,MKI67,MRC2,MYO1D,NOX5,NRSN1,PHF11,PITRM1,PSMC3,PSMD8,PTPRU,PXN,S100A13,SLC12A2,STX12,TMCC1,TMEM131,TRAP1,ZEB2,ZNF608	39 (17)	17
ATM		kinase	ATM,Creb,ERK1/2,IKBKB,IKK (complex),Jnk,JUN,MAPK1,MEF2D,NFkB (complex),RB1,RELA,TP53	2		0.18	0.00752	0.0137	ANXA6,AP3M2,ATP5MC1,BLK,CD82,CDC42EP3,CERS6,CHCHD3,CLEC4E,CSMD3,DBP,DLST,GHITM,HNRNPU,IER3,IGF2R,INTS1,mir-128,MRC2,MYO1D,NMI,PHF11,PSMD8,PTGER4,PTPRE,PTPRU,PXN,RAD51C,RCAN3,RPL7,TRAP1	31 (13)	12
NOS2		enzyme	FOXO1,GSK3B,IKK (complex),Jnk,MTOR,NFkB (complex),NOS2,TLR3	2		0	0.00725	0.0032	CD82,CDC42EP3,CDK5RAP3,CLEC4E,DBP,GLRX3,HNRNPU,IER3,ISLR2,LEMD3,MAPT,MRC2,PXN,RAD51C,SFXN1,SLC12A2,STX12,TMCC1	18 (8)	8
COL18A1		other	COL18A1,ETS1,Jnk,MAPK1,MTOR,PTEN,RELA	2		0	0.00711	0.0036	AP3M2,GPR63,ISLR2,LEF1,MAPT,MKI67,MRC2,NMI,NOX5,NTRK1,PHF11,PTGER4,RAD51C,RCAN3,SLC12A2,STX12,TMCC1,ZEB2	18 (7)	6
TRAF5		transporter	ERK1/2,Jnk,MAPK1,NFkB (complex),P38 MAPK,RELA,STAT3,TRAF5	2		1.213	0.00667	0.0038	AP3M2,CD82,CLEC4E,COBL,COPG2,DBP,IER3,LEF1,MKI67,MRC2,NMI,NOX5,PHF11,PTGER4,PTPRE,PXN,RCAN3	17 (8)	7
IL2		cytokine	ERK1/2,FYN,IKZF3,IL2,JAK3,Jnk,Mapk,MAPK1,MTOR,P38 MAPK,RB1,STAT3,STAT5a/b,STAT5B,STAT6	2		-1.3	0.00658	0.0055	ANKS1B,CD82,CHCHD3,COBL,COPG2,DBP,DIP2B,DLST,GHITM,GPR63,IER3,IGF2R,ISLR2,KLHL31,MAPT,MKI67,MRC2,NMI,NOX5,PHF11,PTPRE,RCAN3,SEMA5A,SLC12A2,STX12,TMCC1,TMEM131,ZEB2,ZNF608	29 (15)	14
MAPK14		kinase	CEBPB,Creb,EGFR,IKK (complex),Jnk,JUN,MAP2K7,MAPK14,MTOR,P38 MAPK,RB1,RELA,SP1,STAT3,TP53,TSC2	2		-1.151	0.00644	0.0166	ANXA6,AP3M2,ATP5MC1,CAD,CD82,CDC42EP3,CERS6,CHCHD3,COBL,COPG2,CSMD3,DLST,GHITM,HNRNPU,IGF2R,INTS1,ISLR2,JPT1,KCNQ3,LEF1,LEMD3,MAP2K4,MAPT,mir-128,MRC2,PSMC3,PSMD8,PTGER4,PTPRE,PTPRU,RAD51C,RPA3,RPL7,STX12,TMCC1,TRAP1,WIF1	37 (16)	16
BTK		kinase	BTK,IKBKB,IKK (complex),MAPK14,MTOR,NFkB (complex),NFKB2,P38 MAPK,PLCG2,STAT5a/b,STAT5B,SYK,TP53	2		0	0.0059	0.0088	ANKS1B,ANXA6,ATP5MC1,CD82,CDC42EP3,CERS6,CLEC4E,CSMD3,DBP,DIP2B,DLST,GPR63,IER3,ISLR2,KLHL31,LEF1,MAPT,mir-128,MKI67,MYO1D,NOX5,PSMD8,PTPRU,PXN,RAD51C,RPL7,SLC12A2,STX12,TMCC1,TRAP1,WIF1,ZEB2	32 (13)	12
MAPK1		kinase	DUSP1,EGFR,GSK3B,LIN28A,MAPK1,MAPK14,NFkB (complex),NR3C1,PARP1,RARA	2		0.853	0.00588	0.005	CAD,CD82,CDC42EP3,CLEC4E,COBL,DBP,FAM186A,FUS,LEF1,MKI67,NELL2,NMI,NOX5,NTRK1,PHF11,POU2F1,PTPRE,PXN,RCAN3,SH2D2A,WIF1,ZEB2	22 (10)	10
TBK1		kinase	IRF3,MTOR,NFkB (complex),RELA,TBK1,TP53	2		0.186	0.00564	0.0077	ANXA6,AP3M2,ATP5MC1,CD82,CDC42EP3,CERS6,CLEC4E,CSMD3,DLST,GPR63,ISLR2,LEF1,MAPT,mir-128,MKI67,NMI,PHF11,PSMD8,PTGER4,PTPRE,PTPRU,PXN,RPL7,RPTOR,SLC12A2,STX12,TMCC1,TRAP1,ZEB2	29 (6)	6
DDX58		enzyme	DDX58,IRF3,MTOR,NFkB (complex),P38 MAPK,RELA,STAT3	2		1.414	0.00515	0.0015	AP3M2,CD82,CLEC4E,COBL,COPG2,DBP,IER3,ISLR2,LEF1,MAPT,NMI,PHF11,PTGER4,PXN,RPTOR,SLC12A2,STX12,TMCC1	18 (7)	7
ESR2		ligand-dependent nuclear receptor	EGFR,ESR2,JUN,MAPK1,MTOR,NFkB (complex),SP1	2		-0.853	0.00512	0.0025	CAD,CLEC4E,DBP,HNRNPU,IER3,IGF2R,ISLR2,KCNQ3,LRP1B,MAPT,MKI67,NMI,NOX5,PHF11,PTPRE,PXN,RCAN3,SLC12A2,STX12,TMCC1,TOMM70,ZEB2	22 (7)	7
SIRT6		enzyme	CTNNB1,EIF4E,ERK1/2,FOXO1,GSK3B,IGF1R,INS,INSR,MTOR,MYC,PTEN,SIRT6	2		0	0.00491	0.0047	ATP5MC1,CAD,CD82,CDC42EP3,CDK5RAP3,CERS6,DBP,GPR63,HNRNPU,IER3,IGF2R,ISLR2,LEF1,LEMD3,MAPT,MKI67,NTRK1,PTPRE,PXN,RAD51C,RPL7,RTN2,SLC12A2,STX12,TMCC1,UBE4A,WIF1,ZEB2	28 (12)	12
PLA2G4A		enzyme	PLA2G4A,RELA,SYK	2		0.707	0.00487	0.002	AP3M2,KLHL31,LEF1,MAPT,NOX5,PTGER4,PTPRE,PXN	8 (3)	3
MAP3K7		kinase	EGFR,IKBKB,IKK (complex),IRF3,Jnk,JUN,MAP2K7,MAP3K7,MAPK9,NFkB (complex),P38 MAPK,RELA,SREBF1	2		1.964	0.0048	0.0014	AP3M2,CAD,CD82,CLEC4E,DBP,HNRNPU,IER3,IGF2R,LEF1,MAP2K4,MRC2,MYO1D,NMI,PHF11,PTGER4,PTPRE,PXN,RAD51C,RPTOR,S100A13,ZEB2	21 (13)	12
SYK		kinase	ABL1,Cdc42,CDH1,FOXO1,IKZF3,Jnk,LCP2,MAPK1,MAPK14,MTOR,MYD88,NFkB (complex),P38 MAPK,PLCG2,PRKCD,RELA,STAT3,SYK,TICAM1	2		0.756	0.00407	0.0032	AP3M2,CD82,CDC42EP3,CDK5RAP3,CLEC4E,COBL,COPG2,DBP,ISLR2,KLHL31,LAMP1,LEMD3,MAPT,MKI67,MRC2,NMI,NOX5,PHF11,PTGER4,PTPRE,PXN,RCAN3,RPTOR,SEMA5A,SLC12A2,STX12,TMCC1,WIF1	28 (19)	19
INS		other	CREB1,ERK1/2,ERN1,FOXA2,FOXO1,FOXO3,FOXO4,INS,INSR,Jnk,Mapk,MAPK1,MAPK14,MTOR,RB1,STAT5B,TSC2,YAP1	2		-0.898	0.00346	0.0039	ANKS1B,ATP5MC1,CAD,CDC42EP3,CDK5RAP3,CERS6,CHCHD3,DBP,DIP2B,DLST,GHITM,GPR63,IER3,IGF2R,ISLR2,LEF1,LEMD3,MAPT,MKI67,MRC2,NMI,NOX5,PHF11,PSMC3,PTPRE,RCAN3,SLC12A2,STX12,TBXAS1,TMCC1,ZEB2	31 (18)	18
TLR2		transmembrane receptor	Creb,ERK1/2,FOXO1,IKK (complex),Jnk,JUN,Mapk,MAPK14,MAPK9,MTOR,NCF1,NFkB (complex),PRKCD,RELA,SP1,STAT3,TLR2	2		0.962	0.00329	0.002	AP3M2,CDC42EP3,CDK5RAP3,CLEC4E,COBL,COPG2,DBP,HNRNPU,HYAL3,IGF2R,INTS1,ISLR2,KCNQ3,LAMP1,LEMD3,MAPT,MRC2,NMI,PTGER4,PTPRE,PXN,RAD51C,SLC12A2,STX12,TMCC1,WIF1,ZEB2	27 (17)	17
NFKBIA		transcription regulator	MTOR,NFkB (complex),NFKBIA,RELA,TP53	2		-0.192	0.00321	0.0048	ANXA6,AP3M2,ATP5MC1,CD82,CDC42EP3,CERS6,CLEC4E,CSMD3,DBP,DLST,GPR63,IER3,ISLR2,LEF1,MAPT,mir-128,MKI67,PSMD8,PTGER4,PTPRE,PTPRU,RPL7,SLC12A2,STX12,TMCC1,TRAP1,ZEB2	27 (5)	4
NOTCH1		transcription regulator	EGFR,ERK1/2,IGF1R,IKBKB,MAPK1,MTOR,NFkB (complex),NOTCH1,RELA,STAT3	2		1	0.003	0.0009	AP3M2,ATP5MC1,CAD,CLEC4E,COBL,COPG2,DBP,IER3,IGF2R,ISLR2,LEF1,MAPT,MKI67,MYO1D,NMI,NOX5,PHF11,PTGER4,PTPRE,PXN,RCAN3,SLC12A2,STX12,TMCC1,ZEB2	25 (10)	10
PARP1		enzyme	ERK1/2,IRF3,Jnk,NFkB (complex),PARP1,RELA,SIRT1,STAT3,TP53	2		1.414	0.00282	0.0029	ANXA6,AP3M2,ATP5MC1,CD82,CDC42EP3,CERS6,CLEC4E,COBL,COPG2,CSMD3,DBP,DLST,GPR63,IER3,LEF1,LRCH1,MAPT,mir-128,MKI67,MRC2,NELL2,PHF11,POU2F1,PSMD8,PTGER4,PTPRE,PTPRU,PXN,RPL7,RPTOR,TRAP1,ZEB2	32 (9)	9
ERK		group	CCND1,CEBPB,Creb,DUSP1,EIF4E,ERK,ERK1/2,GSK3B,MTOR,NFkB (complex),NOS2,Notch,PLA2G4A,PPARG,RELA,RXRA,STAT3	2		1.095	0.00277	0.0027	AHI1,AP3M2,CD82,CDC42EP3,CLEC4E,COBL,COPG2,DBP,INTS1,ISLR2,JPT1,LEF1,LEMD3,MAPT,MKI67,NOX5,NTRK1,PTGER4,PTPRE,PXN,RPA3,SFXN1,SH2D2A,STX12,TBXAS1,TMCC1,UBE4A,VAMP5,WWOX,ZEB2	30 (17)	16
EIF2AK2		kinase	EIF2AK2,GSK3B,IKK (complex),IRF3,Jnk,JUN,MAPK14,NFkB (complex),RELA,STAT3,TP53	2		1.257	0.00222	0.0033	ANXA6,AP3M2,ATP5MC1,CD82,CDC42EP3,CERS6,CLEC4E,COBL,COPG2,CSMD3,DBP,DLST,GPR63,HNRNPU,IER3,IGF2R,mir-128,MKI67,MRC2,NMI,PHF11,PSMD8,PTGER4,PTPRU,PXN,RAD51C,RPL7,RPTOR,TRAP1,WIF1,ZEB2	31 (11)	11
IL6		cytokine	ERK1/2,IL6,Jnk,MAPK1,MYC,NFkB (complex),NOS2,P38 MAPK,PARP1,PRKCD,RB1,RELA,SIRT1,STAT3,STAT5a/b,STAT6	2		0	0.00136	0.0012	AP3M2,CAD,CD82,CHCHD3,CLEC4E,COBL,COPG2,DLST,GHITM,GPR63,HNRNPU,IER3,IGF2R,LAMP1,LEF1,LRCH1,MAPT,MKI67,MRC2,NELL2,NMI,NOX5,PHF11,POU2F1,PTGER4,PTPRE,PXN,RCAN3,RPL7,RTN2,SFXN1,SLC12A2,TBXAS1,TMEM131,ZEB2,ZNF608	36 (16)	16
PRKCZ		kinase	EGFR,ERK1/2,Jnk,MAPK1,MEF2C,MTOR,NCF1,NFkB (complex),PRKCZ,RELA,SP1,STAT3,STAT6,STK11	2		-0.365	0.000669	0.0005	AP3M2,ATP5MC1,BLK,CAD,CLEC4E,COBL,COPG2,DBP,HYAL3,IER3,IGF2R,ISLR2,KCNQ3,KLHL29,LEF1,MAPT,MKI67,MRC2,NMI,NOX5,PHF11,PTGER4,PTPRE,PXN,RCAN3,SLC12A2,STX12,TMCC1,TMEM131,ZNF608	30 (14)	13
TNFSF12		cytokine	ERK1/2,FOXO1,GSK3B,IKK (complex),Jnk,MAPK1,MTOR,NFkB (complex),P38 MAPK,RELA,TNFSF12	2		1.225	0.000497	0.0001	AP3M2,CD82,CDC42EP3,CDK5RAP3,CLEC4E,DBP,IER3,ISLR2,LEF1,LEMD3,MAPT,MKI67,MRC2,NMI,NOX5,PHF11,PTGER4,PTPRE,PXN,RAD51C,RCAN3,SLC12A2,STX12,TMCC1	24 (11)	11
KITLG		growth factor	ERK1/2,JUN,KITLG,Mapk,MAPK1,MTOR,P38 MAPK,RB1,RELA,STAT3	2		0.192	0.000413	0.0003	AP3M2,CD82,CHCHD3,COBL,COPG2,DBP,DLST,GHITM,GPR63,HNRNPU,IER3,IGF2R,ISLR2,LEF1,MAPT,MKI67,NMI,NOX5,PHF11,PTGER4,PTPRE,PXN,RCAN3,SLC12A2,STX12,TMCC1,ZEB2	27 (10)	9
TP53		transcription regulator	CCND1,CYP19A1,EIF4E,ERBB2,FOXO3,GLI1,Jnk,JUN,MAP2K1,MAPK14,MAPK9,MTOR,PRKAA1,RB1,RELA,STAT3,TP53,TP73,TSC2	2		1.131	0.000273	0.0007	AHI1,ANXA6,AP3M2,ARL5C,ATP5MC1,CAPRIN2,CD82,CDC14B,CDC42EP3,CERS6,CHCHD3,CLEC4E,COBL,COPG2,CSMD3,DBP,DLST,GHITM,GPR63,HNRNPU,IER3,ISLR2,JPT1,KLHL29,KLK1,LAMP1,LEMD3,MAPT,mir-128,MKI67,MRC2,NMI,NOX5,NTRK1,PSMC3,PSMD8,PTGER4,PTPRE,PTPRU,PXN,RPL7,SLC12A2,STX12,TMCC1,TRAP1,UBE4A,USP48,WIF1,WWOX,ZEB2	50 (19)	19
KDM4A		transcription regulator	IRF3,KDM4A,TBK1	2		0	0.102	0.048	JPT1,NMI,PHF11,RPTOR	4 (3)	3
SLPI		other	NFkB (complex),RELA,SLPI	2		-1.89	0.0974	0.0488	AP3M2,CLEC4E,DBP,IER3,LEF1,PTGER4,PXN	7 (3)	2
TERF2IP		other	NFkB (complex),RELA,TERF2IP	2		1.89	0.0912	0.0424	AP3M2,CLEC4E,DBP,IER3,LEF1,PTGER4,PXN	7 (3)	2
ATG7		enzyme	ATG7,IRF3,JUN,RELA,STAT3	2		-0.577	0.0897	0.0497	AP3M2,CD82,COBL,COPG2,HNRNPU,IGF2R,LAMP1,LEF1,PHF11,PTGER4,PXN,RPTOR	12 (5)	5
CD46		transmembrane receptor	CD46,PARP1	2		-1.732	0.0889	0.0331	NELL2,POU2F1,PTGER4	3 (2)	2
miR-146a-5p (and other miRNAs w/seed GAGAACU)		mature microRNA	FYN,Jnk,JUN,MAPK14,miR-146a-5p (and other miRNAs w/seed GAGAACU),NFkB (complex),P38 MAPK	2		-0.905	0.0889	0.0435	CD82,CLEC4E,DBP,HNRNPU,IER3,IGF2R,LEF1,MAPT,MRC2,PXN,WIF1	11 (7)	6
PEBP1		other	ERK1/2,IRF3,P38 MAPK,PEBP1,RELA,TBK1	2		1.265	0.0884	0.0499	AP3M2,CD82,IER3,LEF1,NMI,PHF11,PTGER4,PTPRE,PXN,RPTOR	10 (6)	5
Gm45924		other	Gm45924,NFkB (complex),RELA	2		1.89	0.0878	0.0444	AP3M2,CLEC4E,DBP,IER3,LEF1,PTGER4,PXN	7 (3)	2
N4BP1		enzyme	N4BP1,NFkB (complex),RELA	2		-1.89	0.0836	0.0376	AP3M2,CLEC4E,DBP,IER3,LEF1,PTGER4,PXN	7 (3)	2
AKAP13		other	AKAP13,NFkB (complex),RELA	2		1.89	0.0804	0.0358	AP3M2,CLEC4E,DBP,IER3,LEF1,PTGER4,PXN	7 (3)	2
PNKD		other	NFkB (complex),PNKD,RELA	2		1.89	0.0804	0.0373	AP3M2,CLEC4E,DBP,IER3,LEF1,PTGER4,PXN	7 (3)	2
LTF		peptidase	LTF,NFkB (complex),RELA	2		1.89	0.0796	0.0356	AP3M2,CLEC4E,DBP,IER3,LEF1,PTGER4,PXN	7 (3)	2
BMX		kinase	BMX,Jnk,NFkB (complex),P38 MAPK,RELA	2		1.667	0.0789	0.0299	AP3M2,CD82,CLEC4E,DBP,IER3,LEF1,MRC2,PTGER4,PXN	9 (5)	4
P2RY6		G-protein coupled receptor	ERK1/2,Jnk,JUN,NFkB (complex),P2RY6,RELA	2		0	0.0783	0.0447	AP3M2,CLEC4E,DBP,HNRNPU,IER3,IGF2R,LEF1,MRC2,PTGER4,PTPRE	10 (6)	5
HERPUD1		other	HERPUD1,IRF3,RELA	2		1.633	0.0781	0.0423	AP3M2,LEF1,PHF11,PTGER4,PXN,RPTOR	6 (3)	2
ARL11		other	ARL11,ERK1/2,P38 MAPK,RELA	2		-1.134	0.078	0.0434	AP3M2,CD82,IER3,LEF1,PTGER4,PTPRE,PXN	7 (4)	3
IL1R1		transmembrane receptor	IL1R1,MAPK1,MAPK14,NFkB (complex),P38 MAPK,RELA	2		1.387	0.0777	0.0411	AP3M2,CD82,CLEC4E,DBP,IER3,MKI67,NMI,NOX5,PHF11,PTGER4,PXN,RCAN3,WIF1	13 (6)	5
CCDC88A		other	CCDC88A,CREB1,RELA	2		-1.633	0.0763	0.0344	AP3M2,LEF1,MKI67,NOX5,PTGER4,PXN	6 (3)	2
TRB		transmembrane receptor	ERK1/2,FYN,NFkB (complex),P38 MAPK,RELA,TRB	2		1.897	0.0759	0.0342	AP3M2,CD82,CLEC4E,DBP,IER3,LEF1,MAPT,PTGER4,PTPRE,PXN	10 (6)	5
AGTR1		G-protein coupled receptor	AGTR1,EGFR,ERK1/2,GNAQ,Jnk,Mapk,NFkB (complex),RELA	2		1.155	0.0747	0.0334	AP3M2,CAD,CLEC4E,DBP,IER3,LEF1,MRC2,NOX5,PTGER4,PTPRE,PXN,ZEB2	12 (8)	7
IFI16		transcription regulator	IFI16,IRF3,IRF7,RELA	2		1.633	0.0745	0.0349	AP3M2,LEF1,PHF11,PTGER4,PXN,RPTOR	6 (4)	3
ELANE		peptidase	ELANE,ERK1/2,IL1B,MAPK1,NFkB (complex),RELA	2		0.535	0.0742	0.0416	AP3M2,CLEC4E,DBP,IER3,LEF1,MAPT,MKI67,NEAT1,NOX5,PHF11,PTGER4,PTPRE,PXN,RCAN3	14 (6)	5
PSMB8		peptidase	PSMB8,RELA,Smad2/3	2		1.342	0.0741	0.0431	AP3M2,LEF1,mir-128,PTGER4,PXN	5 (3)	2
PRKCQ		kinase	ERK1/2,Jnk,MAPK1,NFkB (complex),PRKCQ,RELA	2		1.069	0.0728	0.0431	AP3M2,CLEC4E,DBP,IER3,LEF1,MKI67,MRC2,NMI,NOX5,PHF11,PTGER4,PTPRE,PXN,RCAN3	14 (6)	5
TSC22D3		transcription regulator	ERK1/2,FOXO1,Jnk,MAPK1,NFkB (complex),NOS2,P38 MAPK,TSC22D3	2		0	0.0723	0.0408	CD82,CDC42EP3,CDK5RAP3,CLEC4E,DBP,IER3,LEMD3,MKI67,MRC2,NMI,NOX5,PHF11,PTPRE,PXN,RCAN3,SFXN1	16 (8)	7
THRA		ligand-dependent nuclear receptor	MAPK1,RELA,RXRA,STAT3,THRA	2		-0.832	0.0703	0.0368	AP3M2,COBL,COPG2,LAMP1,LEF1,MKI67,NMI,NOX5,NTRK1,PHF11,PTGER4,PXN,RCAN3	13 (5)	5
VCAN		other	EGFR,Jnk,MAPK14,RELA,STAT5a/b,VCAN	2		-0.632	0.0678	0.038	AP3M2,CAD,LEF1,MRC2,NOX5,PTGER4,PTPRE,PXN,WIF1,ZEB2	10 (6)	5
NOTCH2		transcription regulator	MAPK1,NFkB (complex),NOTCH2	2		0.333	0.0675	0.0381	CLEC4E,DBP,IER3,MKI67,NMI,NOX5,PHF11,PXN,RCAN3	9 (3)	2
KNG1		other	EGFR,KNG1,MAPK1	2		-0.707	0.0662	0.0494	CAD,MKI67,NMI,NOX5,PHF11,PTPRE,RCAN3,ZEB2	8 (3)	2
PTPRZ1		phosphatase	ERK1/2,MAPK1,MET,PTEN,PTPRZ1	2		0	0.0652	0.0416	GPR63,LEF1,MKI67,NMI,NOX5,NTRK1,PHF11,PTPRE,PXN,RAD51C,RCAN3,ZEB2	12 (5)	4
Ck2 alpha		group	Ck2 alpha,GPI,IRF3,NFkB (complex),PTEN,TBK1	2		0.632	0.0629	0.0442	CLEC4E,DBP,GPR63,IER3,NMI,NTRK1,PHF11,RAD51C,RPTOR,ZEB2	10 (6)	5
IL-1R		group	ERK1/2,GSK3B,IKK (complex),IL-1R,MAPK1,NFkB (complex),P38 MAPK	2		1.155	0.0615	0.032	CD82,CLEC4E,DBP,IER3,MKI67,NMI,NOX5,PHF11,PTPRE,PXN,RAD51C,RCAN3	12 (7)	6
TNFRSF18		transmembrane receptor	ERK1/2,Jnk,MAPK1,NFkB (complex),P38 MAPK,TNFRSF18	2		0	0.0605	0.0405	CD82,CLEC4E,DBP,IER3,MKI67,MRC2,NMI,NOX5,PHF11,PTPRE,PXN,RCAN3	12 (6)	5
SIRPA		phosphatase	Jnk,NFkB (complex),P38 MAPK,PLCG2,RELA,SIRPA	2		-1.897	0.0597	0.0192	AP3M2,CD82,CLEC4E,DBP,IER3,LEF1,MRC2,NOX5,PTGER4,PXN	10 (6)	5
TLR6		transmembrane receptor	ERK1/2,Jnk,NFkB (complex),P38 MAPK,PRKCD,RELA,TLR2,TLR6	2		1.155	0.0592	0.024	AP3M2,CD82,CLEC4E,DBP,HNRNPU,IER3,LAMP1,LEF1,MRC2,PTGER4,PTPRE,PXN	12 (8)	7
MAP3K3		kinase	Calcineurin protein(s),ERK1/2,IKBKB,IKK (complex),Jnk,MAP3K3,MAPK14,NFkB (complex),P38 MAPK,YAP1	2		0.832	0.059	0.031	CD82,CDC42EP3,CLEC4E,DBP,IER3,KCNQ3,LEF1,MRC2,MYO1D,PTPRE,PXN,RAD51C,WIF1	13 (10)	9
NOX4		enzyme	ERK1/2,INSR,MAPK1,NOX4,P38 MAPK,RB1,STAT3	2		-1.414	0.0566	0.0447	ATP5MC1,CD82,CERS6,CHCHD3,COBL,COPG2,DLST,GHITM,GPR63,IER3,IGF2R,MKI67,NMI,NOX5,PHF11,PTPRE,RCAN3,ZEB2	18 (7)	6
ITGB2		transmembrane receptor	Cdc42,ITGB2,MAPK1,MAPK14,NFkB (complex),P38 MAPK,STAT3,STAT6	2		0.728	0.0561	0.0433	CD82,CLEC4E,COBL,COPG2,DBP,IER3,IGF2R,LAMP1,LEF1,MKI67,NOX5,PHF11,PXN,RCAN3,TMEM131,WIF1,ZNF608	17 (8)	7
DHX15		enzyme	DHX15,ERK1/2,IRF3,P38 MAPK,RELA	2		1.667	0.0557	0.0221	AP3M2,CD82,IER3,LEF1,PHF11,PTGER4,PTPRE,PXN,RPTOR	9 (5)	4
AREG		growth factor	AREG,EGFR,ERK1/2,FOXO1,GSK3B,MAPK1	2		0	0.055	0.0311	CAD,CD82,CDC42EP3,CDK5RAP3,IER3,LEMD3,MKI67,NMI,NOX5,PHF11,PTPRE,RCAN3,STX12,ZEB2	14 (6)	6
CDK4/6		group	CDK4/6,GSK3B,MTOR	2		-0.707	0.054	0.0284	AHI1,CD82,ISLR2,JPT1,MAPT,SLC12A2,STX12,TMCC1	8 (3)	3
ZMPSTE24		peptidase	MTOR,NFkB (complex),ZMPSTE24	2		-0.333	0.0531	0.0192	CLEC4E,DBP,IER3,ISLR2,MAPT,PXN,SLC12A2,STX12,TMCC1	9 (3)	2
DISC		complex	DISC,MAPK1,NFkB (complex)	2		0.333	0.0531	0.0293	CLEC4E,DBP,IER3,MKI67,NMI,NOX5,PHF11,PXN,RCAN3	9 (3)	2
TNFRSF8		transmembrane receptor	MAPK1,NFkB (complex),TNFRSF8	2		1	0.0526	0.0303	CLEC4E,DBP,IER3,MKI67,NMI,NOX5,PHF11,PXN,RCAN3	9 (3)	2
HGF		growth factor	Creb,ERK1/2,GATA4,HGF,IKBKB,IKK (complex),Mapk,MAPK9,MET,MTOR,NFkB (complex),NOTCH1,P38 MAPK,PI3K (family),RB1,STAT3	2		1.279	0.0526	0.0424	CDC42EP3,CHCHD3,CLEC4E,COBL,COPG2,DBP,DLST,GHITM,GPR63,IER3,INTS1,ISLR2,LEF1,MAPT,MYO1D,NMI,PTPRE,PXN,RAD51C,SLC12A2,STX12,TMCC1	22 (16)	15
HMOX1		enzyme	Creb,ERK1/2,HMOX1,MAPK1,MAPK14,NFkB (complex),P38 MAPK,SP1	2		0	0.0521	0.0431	CD82,CLEC4E,DBP,INTS1,KCNQ3,LEF1,MAPT,MKI67,NMI,NOX5,PHF11,PTPRE,PXN,RCAN3,WIF1,ZEB2	16 (8)	8
TIRAP		other	Creb,ERK1/2,IRF3,Jnk,JUN,Mapk,MAPK14,NFkB (complex),P38 MAPK,RELA,TIRAP	2		1.807	0.0515	0.0288	AP3M2,CD82,CLEC4E,DBP,HNRNPU,IER3,IGF2R,INTS1,MRC2,PHF11,PTGER4,PTPRE,PXN,RPTOR,WIF1	15 (11)	10
DUSP1		phosphatase	DUSP1,ERK1/2,Jnk,JUN,Mapk,MAPK1,MAPK14,P38 MAPK,PARP1	2		0.243	0.0511	0.0356	CD82,DBP,HNRNPU,IER3,IGF2R,LEF1,MKI67,MRC2,NELL2,NMI,NOX5,PHF11,POU2F1,PTPRE,RCAN3,SH2D2A,WIF1	17 (9)	9
PP2A		complex	ERK1/2,GSK3B,IRF3,NFkB (complex),PP2A,PTTG1,RELA,STAT5a/b	2		-0.832	0.051	0.0338	AP3M2,CD82,CLEC4E,DBP,IER3,LEF1,NOX5,PHF11,PTGER4,PTPRE,PXN,RAD51C,RPTOR	13 (8)	7
ASAH1		enzyme	ASAH1,GSK3B,MTOR	2		-0.378	0.0501	0.0259	CD82,CERS6,ISLR2,MAPT,SLC12A2,STX12,TMCC1	7 (3)	3
MAP2K1/2		group	EIF4E,ERK1/2,FOXO3,IKBKB,MAP2K1/2,MAPK1,MKNK1,NFkB (complex),Notch,PRKAA1,RARA	2		0.894	0.0494	0.0482	CDC42EP3,CLEC4E,COBL,DBP,FAM186A,KLHL29,LEMD3,MAPT,MKI67,MYO1D,NELL2,NMI,NOX5,NTRK1,PHF11,PTPRE,PXN,RCAN3,UBE4A,ZEB2	20 (11)	10
PLC gamma		group	IRF3,NFkB (complex),PLC gamma,RELA	2		-1.667	0.0491	0.0267	AP3M2,CLEC4E,DBP,IER3,LEF1,PHF11,PTGER4,PXN,RPTOR	9 (4)	3
CD40LG		cytokine	CD40LG,CREB1,ERK1/2,JAK3,Jnk,MAPK14,MAPK9,NFkB (complex),P38 MAPK,PRKCD,RELA,STAT3	2		0.728	0.0482	0.0257	AP3M2,CD82,CLEC4E,COBL,COPG2,DBP,IER3,KLHL31,LAMP1,MKI67,MRC2,NMI,NOX5,PTGER4,PTPRE,PXN,WIF1	17 (12)	11
PLAT		peptidase	ERK1/2,JUN,MTOR,P38 MAPK,PLAT	2		0.632	0.0478	0.0196	CD82,HNRNPU,IER3,IGF2R,ISLR2,MAPT,PTPRE,SLC12A2,STX12,TMCC1	10 (5)	4
HDAC3		transcription regulator	HDAC3,MTOR,NFkB (complex),TLR9	2		-1.508	0.0477	0.0203	CERS6,CLEC4E,DBP,GLRX3,IER3,ISLR2,MAPT,PXN,SLC12A2,STX12,TMCC1	11 (4)	3
ROCK2		kinase	26s Proteasome,MAPK1,MTOR,ROCK2	2		-0.302	0.0461	0.0292	ISLR2,LAMP1,MAPT,MKI67,NMI,NOX5,PHF11,RCAN3,SLC12A2,STX12,TMCC1	11 (4)	3
PPP4C		phosphatase	IRF3,NFkB (complex),PPP4C,TBK1	2		1.134	0.046	0.0234	CLEC4E,DBP,IER3,NMI,PHF11,PXN,RPTOR	7 (4)	3
NPC2		transporter	ERK1/2,MAPK1,NPC2,RELA	2		1.265	0.0456	0.0226	AP3M2,LEF1,MKI67,NMI,NOX5,PHF11,PTGER4,PTPRE,PXN,RCAN3	10 (4)	4
GADD45B		other	GADD45B,MAPK14,NFkB (complex),P38 MAPK,RB1	2		-0.577	0.0456	0.0193	CD82,CHCHD3,CLEC4E,DBP,DLST,GHITM,GPR63,IER3,LEF1,PXN,WIF1,ZEB2	12 (5)	4
OPTN		other	IRF3,NFkB (complex),OPTN,TBK1	2		-1.134	0.0443	0.0234	CLEC4E,DBP,IER3,NMI,PHF11,PXN,RPTOR	7 (4)	3
CSNK2A2		kinase	CSNK2A2,NFkB (complex),RELA,SNCA	2		1.897	0.0439	0.0251	AP3M2,CDC42EP3,CLEC4E,DBP,FAM81A,IER3,LEF1,PTGER4,PXN,TMEFF2	10 (4)	3
ST6GAL1		enzyme	EGFR,PLCG2,RB1,RELA,ST6GAL1	2		0	0.0437	0.0279	AP3M2,CAD,CHCHD3,DLST,GHITM,GPR63,LEF1,NOX5,PTGER4,PTPRE,PXN,ZEB2	12 (5)	4
TRAF3IP2		enzyme	IKBKB,IRF3,Jnk,JUN,NFkB (complex),RELA,TRAF3IP2	2		1.941	0.0433	0.0157	AP3M2,CLEC4E,DBP,HNRNPU,IER3,IGF2R,LEF1,MRC2,MYO1D,PHF11,PTGER4,PXN,RPTOR	13 (7)	6
TP73-AS1		other	MTOR,PI3K (family),TP73-AS1	2		0.816	0.0432	0.0149	ISLR2,MAPT,PXN,SLC12A2,STX12,TMCC1	6 (3)	2
AKAP12		transporter	AKAP12,MAPK1,RB1	2		1.897	0.0427	0.0338	CHCHD3,DLST,GHITM,GPR63,MKI67,NMI,NOX5,PHF11,RCAN3,ZEB2	10 (3)	2
ROCK1		kinase	26s Proteasome,GSK3B,MTOR,NFkB (complex),PTEN,ROCK1,TSC2	2		0.535	0.0423	0.0261	CD82,CLEC4E,DBP,GPR63,IER3,ISLR2,LAMP1,MAPT,NTRK1,PSMC3,RAD51C,SLC12A2,STX12,TMCC1	14 (7)	6
RNF7		enzyme	ERK1/2,JUN,NFkB (complex),RELA,RNF7	2		1.265	0.0419	0.021	AP3M2,CLEC4E,DBP,HNRNPU,IER3,IGF2R,LEF1,PTGER4,PTPRE,PXN	10 (5)	4
IL6R		transmembrane receptor	CREB1,ERK1/2,IL6R,Jnk,MAPK1,NFkB (complex),P38 MAPK,RELA,STAT3	2		1.213	0.041	0.0218	AP3M2,CD82,CLEC4E,COBL,COPG2,DBP,IER3,LEF1,MKI67,MRC2,NMI,NOX5,PHF11,PTGER4,PTPRE,PXN,RCAN3	17 (9)	8
LAMTOR2		other	LAMTOR2,MAPK1,MTOR	2		-0.632	0.0407	0.0202	ISLR2,MAPT,MKI67,NMI,NOX5,PHF11,RCAN3,SLC12A2,STX12,TMCC1	10 (3)	2
mir-25		microRNA	Jnk,JUN,mir-25,P38 MAPK,RELA	2		-1.265	0.0407	0.0128	AP3M2,CD82,HNRNPU,IER3,IGF2R,LEF1,MAP2K4,MRC2,PTGER4,PXN	10 (5)	5
SHARPIN		other	ERK1/2,ITGB1,MAPK1,NFkB (complex),P38 MAPK,RELA,SHARPIN	2		1.291	0.0396	0.0227	AP3M2,CD82,CLEC4E,DBP,IER3,LEF1,MKI67,NMI,NOX5,PHF11,PTGER4,PTPRE,PXN,RCAN3,SIDT1	15 (7)	6
IFIH1		enzyme	IFIH1,IRF3,NFkB (complex),RELA	2		1.667	0.0391	0.0151	AP3M2,CLEC4E,DBP,IER3,LEF1,PHF11,PTGER4,PXN,RPTOR	9 (4)	3
GZMB		peptidase	GZMB,MAPK14,TP53	2		0.447	0.039	0.0434	ANXA6,ATP5MC1,CD82,CDC42EP3,CERS6,CSMD3,DBP,DLST,GPR63,IER3,LEF1,mir-128,MKI67,PSMD8,PTPRE,PTPRU,RPL7,TRAP1,WIF1,ZEB2	20 (3)	2
MET		kinase	EGFR,Jnk,Mapk,MAPK1,MET,PARP1,PI3K (family),STAT3	2		0.5	0.0389	0.0257	CAD,COBL,COPG2,DBP,LEF1,MKI67,MRC2,NELL2,NMI,NOX5,PHF11,POU2F1,PTPRE,PXN,RCAN3,ZEB2	16 (8)	8
CHUK		kinase	CHUK,IKBKB,MTOR,NFkB (complex),NOTCH1,RELA	2		1.387	0.0387	0.0155	AP3M2,CLEC4E,DBP,IER3,ISLR2,LEF1,MAPT,MYO1D,PTGER4,PXN,SLC12A2,STX12,TMCC1	13 (6)	5
AMPK		complex	AMPK,ERK1/2,ERN1,FOXO3,Jnk,MAPK1,MED1,MKNK1,PRKAA2,RB1,YAP1	2		-1.789	0.0385	0.04	CAD,CDC42EP3,CHCHD3,DLST,GHITM,GPR63,HECW2,IER3,KLHL29,LEMD3,MAPT,MKI67,MRC2,NELL2,NMI,NOX5,PHF11,PTPRE,RCAN3,ZEB2	20 (11)	10
ERRFI1		other	EGFR,ERK1/2,ERRFI1,FOXO1,GSK3B,MAPK1,MET,TP73	2		0.728	0.0383	0.0282	ARL5C,CAD,CD82,CDC42EP3,CDK5RAP3,DBP,IER3,LEF1,LEMD3,MKI67,NMI,NOX5,NTRK1,PHF11,PTPRE,RCAN3,ZEB2	17 (8)	7
PROC		peptidase	EGFR,MAPK1,NFkB (complex),P38 MAPK,PROC	2		-1.387	0.0378	0.0245	CAD,CD82,CLEC4E,DBP,IER3,MKI67,NMI,NOX5,PHF11,PTPRE,PXN,RCAN3,ZEB2	13 (5)	4
Esrra		transcription regulator	Esrra,PRKAA1,PRKAA2,RELA,Smad2/3	2		-0.333	0.0374	0.0172	AP3M2,ATP5MC1,CDC42EP3,COX7A2L,KLHL29,LEF1,mir-128,PTGER4,PXN	9 (5)	5
PSMD4		other	PSMD4,RELA,TP53	2		0.655	0.0371	0.0459	ANXA6,AP3M2,ATP5MC1,CD82,CDC42EP3,CERS6,CSMD3,DLST,GPR63,IER3,LEF1,mir-128,MKI67,PSMD8,PTGER4,PTPRE,PTPRU,PXN,RPL7,TRAP1,ZEB2	21 (3)	2
CAMK4		kinase	CAMK4,Creb,CREB1,GSK3B,MTOR	2		-1	0.037	0.0176	CD82,INTS1,ISLR2,MAPT,MKI67,NOX5,SLC12A2,STX12,TMCC1	9 (5)	4
MAP3K4		kinase	Hsp27,Jnk,MAP3K4,MAPK14,MAPK9,P38 MAPK	2		-1.134	0.119	0.0436	CD82,IER3,LEF1,MRC2,NMI,NTRK1,WIF1	7 (6)	5
TICAM2		other	IRF3,IRF7,Jnk,NFkB (complex),P38 MAPK,PLA2G4A,STAT5a/b,TICAM2	2		1	0.111	0.0488	CD82,CLEC4E,DBP,IER3,MRC2,NOX5,PHF11,PXN,RPTOR	9 (8)	7
TAC4		other	Jnk,JUN,NFkB (complex),RELA,TAC4	2		1.897	0.111	0.0487	AP3M2,CLEC4E,DBP,HNRNPU,IER3,IGF2R,LEF1,MRC2,PTGER4,PXN	10 (5)	4
ARF6		transporter	ARF6,IRF3,NFkB (complex),P38 MAPK,RELA	2		1.897	0.11	0.0458	AP3M2,CD82,CLEC4E,DBP,IER3,LEF1,PHF11,PTGER4,PXN,RPTOR	10 (5)	4
RAG2		enzyme	ALOX15,CTNNB1,EGFR,ERK1/2,FOXO1,Jnk,MAP2K1,MTOR,NFkB (complex),P38 MAPK,RAG2,SMAD3,STAT3,STK11	3		0.218	0.0521	0.0418	ATP5MC1,CAD,CD82,CDC42EP3,CDK5RAP3,CLEC4E,COBL,COPG2,ISLR2,KLHL29,LEF1,LEMD3,MAPT,MRC2,NOX5,PTPRE,PXN,SLC12A2,STX12,TMCC1,WIF1	21 (14)	11
APBA3		transporter	APBA3,IRF3,Jnk,MAP2K1,NFkB (complex),NFKB2,P38 MAPK,RELA,STAT3,SYK,TBK1,TICAM1,TRAF3	3		0.943	0.0509	0.0399	AP3M2,CD82,CLEC4E,COBL,COPG2,DBP,IER3,KLHL31,LEF1,MAPT,MKI67,MRC2,NMI,NOX5,PHF11,PTGER4,PXN,RPTOR	18 (13)	11
Tgf beta		group	CTNNB1,EGFR,ERK1/2,FOXO1,MTOR,NFkB (complex),Smad2/3,SMAD3,STAT3,STK11,Tgf beta	3		0.218	0.0493	0.0306	ATP5MC1,CAD,CDC42EP3,CDK5RAP3,CLEC4E,COBL,COPG2,DBP,IER3,ISLR2,KLHL29,LEF1,LEMD3,MAPT,mir-128,PTPRE,PXN,SLC12A2,STX12,TMCC1,WIF1	21 (11)	9
F Actin		complex	CAMP,Creb,CTNNB1,EP300,F Actin,IRF3,Jnk,MAPK1,P38 MAPK,Pld,PTK2B,RELA,STAT3	3		1.213	0.0446	0.0365	AP3M2,COBL,COPG2,IER3,INTS1,LEF1,MAPT,MKI67,MRC2,NMI,PHF11,PTGER4,PXN,RCAN3,RPTOR,WIF1,ZEB2	17 (13)	9
ITGAE		other	CEBPA,CEBPB,Creb,CTNNB1,ERK1/2,GATA1,ITGAE,JUN,Mapk,MED1,MTOR,NCL,NFkB (complex),PLCG1,PRKAA1,RELA,SP1,STAT3	3		-0.378	0.04	0.0489	AP3M2,CLEC4E,COBL,COPG2,DBP,HECW2,HNRNPU,IGF2R,INTS1,ISLR2,JAZF1,JPT1,KCNQ3,KLHL29,LEF1,LEMD3,MAPT,MKI67,PTGER4,PTPRE,PXN,RPA3,STX12,TBXAS1,TMCC1,UBE4A,WIF1,ZNF366	28 (18)	16
PPIB		enzyme	CEBPA,CEBPB,Creb,CTNNB1,ERK1/2,GATA1,IRF3,JUN,MED1,MTOR,NFkB (complex),PPIB,PRKAA1,RELA,SP1,STAT3	3		-0.186	0.0396	0.0482	AP3M2,CLEC4E,COBL,COPG2,DBP,HECW2,HNRNPU,IGF2R,INTS1,ISLR2,JAZF1,JPT1,KCNQ3,KLHL29,LEF1,LEMD3,MAPT,MKI67,PHF11,PTGER4,PTPRE,PXN,RPA3,RPTOR,STX12,TBXAS1,TMCC1,WIF1,ZNF366	29 (16)	15
KDM2B		enzyme	CCND1,FOS,FOXO3,JUN,KDM2B,NFkB (complex),RB1,TP53	3		0	0.0382	0.05	AHI1,ANXA6,ATP5MC1,CD82,CERS6,CHCHD3,CLEC4E,CSMD3,DBP,DLST,GHITM,GPR63,HNRNPU,IGF2R,JPT1,LEMD3,mir-128,MKI67,PSMD8,PTPRE,PTPRU,PXN,RPL7,TRAP1,WWOX,ZEB2	26 (8)	6
ZC3HAV1		other	CEBPA,estrogen receptor,IKBKB,IKK (complex),IRF3,NFkB (complex),RELA,TP53,ZC3HAV1	3		1.3	0.0371	0.0466	ANXA6,AP3M2,ATP5MC1,CD82,CDC42EP3,CERS6,CLEC4E,CSMD3,DBP,DLST,GPR63,IER3,LEF1,MAPT,mir-128,MKI67,MYO1D,PHF11,PSMD8,PTGER4,PTPRE,PTPRU,PXN,RAD51C,RPL7,RPTOR,TBXAS1,TRAP1,ZEB2	29 (9)	8
CACTIN		other	CACTIN,CEBPA,estrogen receptor,IKBKB,IKK (complex),IRF3,NFkB (complex),RELA,TP53	3		-1.3	0.0369	0.0463	ANXA6,AP3M2,ATP5MC1,CD82,CDC42EP3,CERS6,CLEC4E,CSMD3,DBP,DLST,GPR63,IER3,LEF1,MAPT,mir-128,MKI67,MYO1D,PHF11,PSMD8,PTGER4,PTPRE,PTPRU,PXN,RAD51C,RPL7,RPTOR,TBXAS1,TRAP1,ZEB2	29 (9)	8
WDFY1		other	CEBPA,estrogen receptor,IKBKB,IKK (complex),IRF3,NFkB (complex),RELA,TP53,WDFY1	3		1.3	0.0369	0.0463	ANXA6,AP3M2,ATP5MC1,CD82,CDC42EP3,CERS6,CLEC4E,CSMD3,DBP,DLST,GPR63,IER3,LEF1,MAPT,mir-128,MKI67,MYO1D,PHF11,PSMD8,PTGER4,PTPRE,PTPRU,PXN,RAD51C,RPL7,RPTOR,TBXAS1,TRAP1,ZEB2	29 (9)	8
HS6ST1		enzyme	CEBPA,CEBPB,Creb,CTNNB1,EIF4E,ERK1/2,FGFR1,GATA1,HS6ST1,Jnk,JUN,Mapk,MED1,MTOR,NFkB (complex),P38 MAPK,PRKAA1,RELA,SP1,STAT3	3		0	0.0362	0.0479	AP3M2,CD82,CLEC4E,COBL,COPG2,DBP,HECW2,HNRNPU,IGF2R,INTS1,ISLR2,JAZF1,JPT1,KCNQ3,KLHL29,LEF1,LEMD3,MAPT,MKI67,MRC2,PTGER4,PTPRE,PXN,RPA3,STX12,TBXAS1,TMCC1,UBE4A,WIF1,ZNF366	30 (20)	18
HS6ST2		enzyme	CEBPA,CEBPB,Creb,CTNNB1,EIF4E,ERK1/2,FGFR1,GATA1,HS6ST2,Jnk,JUN,Mapk,MED1,MTOR,NFkB (complex),P38 MAPK,PRKAA1,RELA,SP1,STAT3	3		0	0.036	0.0478	AP3M2,CD82,CLEC4E,COBL,COPG2,DBP,HECW2,HNRNPU,IGF2R,INTS1,ISLR2,JAZF1,JPT1,KCNQ3,KLHL29,LEF1,LEMD3,MAPT,MKI67,MRC2,PTGER4,PTPRE,PXN,RPA3,STX12,TBXAS1,TMCC1,UBE4A,WIF1,ZNF366	30 (20)	18
BPIFB1		other	BPIFB1,CEBPA,CEBPB,Creb,CTNNB1,ERK1/2,GATA1,JINK1/2,JUN,MED1,MTOR,NFkB (complex),PARP1,PRKAA1,RELA,SP1,STAT3	3		0.557	0.0353	0.0431	AP3M2,CLEC4E,COBL,COPG2,DBP,HECW2,HNRNPU,IGF2R,INTS1,ISLR2,JAZF1,JPT1,KCNQ3,KLHL29,LEF1,LEMD3,MAPT,MKI67,NELL2,POU2F1,PTGER4,PTPRE,PXN,RPA3,STX12,TBXAS1,TMCC1,WIF1,ZNF366	29 (17)	15
PAX6		transcription regulator	CCND1,FOXO3,JUN,PAX6,RB1,TP53	3		0.2	0.0338	0.0482	AHI1,ANXA6,ATP5MC1,CD82,CERS6,CHCHD3,CSMD3,DBP,DLST,GHITM,GPR63,HNRNPU,IGF2R,JPT1,LEMD3,mir-128,MKI67,PSMD8,PTPRE,PTPRU,RPL7,SEMA5A,TRAP1,WWOX,ZEB2	25 (6)	6
SPINT1		other	Creb,ERK1/2,GATA4,HGF,IKBKB,IKK (complex),Mapk,MAPK9,MET,MTOR,NFkB (complex),NOTCH1,P38 MAPK,PI3K (family),RB1,SPINT1,STAT3	3		-1.46	0.0336	0.0256	CDC42EP3,CHCHD3,CLEC4E,COBL,COPG2,DBP,DLST,GHITM,GPR63,IER3,INTS1,ISLR2,LEF1,MAPT,MYO1D,NMI,PTPRE,PXN,RAD51C,SLC12A2,STX12,TMCC1,WIF1	23 (17)	16
PTPRH		phosphatase	EPHB2,FYN,MAPK1,NFkB (complex),PTPRH,TLR3,TYRO3	3		-0.905	0.0331	0.0249	CLEC4E,DBP,GLRX3,HNRNPU,MAPT,MKI67,NMI,NOX5,PHF11,PXN,RCAN3	11 (7)	4
MLKL		kinase	CEBPA,estrogen receptor,IKBKB,IKK (complex),IRF3,MAPKAPK2,MLKL,NFkB (complex),RELA,TP53	3		1.3	0.0326	0.0405	ANXA6,AP3M2,ATP5MC1,CD82,CDC42EP3,CERS6,CLEC4E,CSMD3,DBP,DLST,GPR63,IER3,LEF1,MAPT,mir-128,MKI67,MYO1D,PHF11,PSMD8,PTGER4,PTPRE,PTPRU,PXN,RAD51C,RPL7,RPTOR,TBXAS1,TRAP1,ZEB2	29 (10)	8
UBE2E2		enzyme	26s Proteasome,Cdc42,CEBPA,estrogen receptor,IKBKB,IKK (complex),NFkB (complex),RELA,TARDBP,TP53,UBE2E2	3		-0.928	0.0313	0.0375	ANXA6,AP3M2,ATP5MC1,CD82,CDC42EP3,CERS6,CLEC4E,CSMD3,DBP,DLST,GPR63,IER3,LAMP1,LEF1,MAPT,mir-128,MKI67,MYO1D,PSMD8,PTGER4,PTPRE,PTPRU,PXN,RAD51C,RPL7,TBC1D1,TBXAS1,TRAP1,ZEB2	29 (11)	10
HDAC1		transcription regulator	CCND1,CEBPA,estrogen receptor,FOXO3,HDAC1,IKBKB,IKK (complex),JUN,NFkB (complex),RB1,RELA	3		-1.706	0.0295	0.0278	AHI1,AP3M2,CHCHD3,CLEC4E,DBP,DLST,GHITM,GPR63,HNRNPU,IER3,IGF2R,JPT1,LEF1,LEMD3,MAPT,MYO1D,PTGER4,PXN,RAD51C,TBXAS1,WWOX,ZEB2	22 (11)	10
RRAD		enzyme	CaMKII,CCND1,Cdc42,FOXO3,GSK3B,IKK (complex),JUN,RB1,RRAD,TP53	3		-0.392	0.029	0.0482	AHI1,ANXA6,ATP5MC1,CD82,CERS6,CHCHD3,CSMD3,DBP,DLST,GHITM,GPR63,HNRNPU,IGF2R,JPT1,LAMP1,LEMD3,mir-128,MKI67,PSMD8,PTPRE,PTPRU,RAD51C,RPL7,TRAP1,WWOX,ZEB2	26 (10)	8
ZDHHC21		enzyme	CD46,Creb,CTNNB1,ERK1/2,Jnk,LAT,LCK,LCP2,Mapk,MAPK1,MAPK14,NCL,NFkB (complex),NRAS,P38 MAPK,PLCG1,PLCG2,PPARG,ZAP70,ZDHHC21	3		-0.426	0.0288	0.0237	CD82,CLEC4E,DBP,IER3,INTS1,LAMP1,MKI67,MRC2,NMI,NOX5,NPR3,PHF11,PTGER4,PTPRE,PXN,RCAN3,TBXAS1,TRIM11,UBE4A,VAMP5,WIF1,ZEB2	22 (20)	15
CD82	0.574	other	CD82,EGFR,Jnk,MAPK1,MET,NFAT5,NFkB (complex),PARP1,PI3K (family),RAC1,RELA,STAT3,TP53	3		-1.095	0.0283	0.0453	ANXA6,AP3M2,ATP5MC1,CAD,CDC42EP3,CERS6,CLEC4E,COBL,COPG2,CSMD3,DLST,GPR63,HECW2,LEF1,mir-128,MKI67,MRC2,NELL2,NMI,NOX5,PHF11,POU2F1,PSMD8,PTGER4,PTPRU,PXN,RCAN3,RPL7,TRAP1,ZEB2	30 (13)	11
CARD8		other	CARD8,CASP8,CEBPA,ERK1/2,estrogen receptor,IKBKB,IKK (complex),IRF3,NFkB (complex),P38 MAPK,RELA,TBK1,TP53	3		-1.461	0.0278	0.0359	ANXA6,AP3M2,ATP5MC1,CD82,CDC42EP3,CERS6,CLEC4E,CSMD3,DBP,DLST,GPR63,IER3,LEF1,MAPT,mir-128,MKI67,MYO1D,NMI,PHF11,PSMD8,PTGER4,PTPRE,PTPRU,PXN,RAD51C,RPL7,RPTOR,TBXAS1,TRAP1,ZEB2	30 (13)	11
CASP9		peptidase	ARG1,CASP6,CASP9,caspase,CEBPA,EIF2AK2,estrogen receptor,IKBKB,IKK (complex),NFkB (complex),RELA,TP53	3		1.3	0.0268	0.0326	ANXA6,AP3M2,ATP5MC1,CD82,CDC42EP3,CERS6,CLEC4E,CSMD3,DBP,DLST,GPR63,IER3,LEF1,MAPT,mir-128,MKI67,MYO1D,NMI,PSMD8,PTGER4,PTPRE,PTPRU,PXN,RAD51C,RPL7,RPTOR,TBXAS1,TRAP1,ZEB2	29 (12)	9
PTCRA		other	AR,CBL,EGFR,IGF1R,Jnk,MAPK1,MAPK14,MTOR,NFkB (complex),PLCG2,PRKCQ,PTCRA,RELA,STAT3,SYK,TGFB1	3		-0.577	0.0267	0.0419	AP3M2,ATP5MC1,CAD,CERS6,CLEC4E,COBL,COPG2,IER3,IGF2R,ILDR2,ISLR2,KLHL31,LEF1,MKI67,MRC2,NMI,NOX5,PHF11,PITRM1,PTGER4,PXN,RCAN3,SLC12A2,STX12,TMCC1,WIF1,ZEB2	27 (16)	13
CACNA1C		ion channel	CACNA1C,Creb,CREB1,CTNNB1,EGFR,ELAVL1,ERK1/2,IKBKB,IKK (complex),INSR,Jnk,MAPK1,NFkB (complex),P38 MAPK,PGR,PPARG,PRKCA,RB1,RELA,TP73	3		1.3	0.0266	0.044	AP3M2,ARL5C,ATP5MC1,CAD,CERS6,CHCHD3,CLEC4E,DLST,GHITM,GPR63,IER3,IGF2R,INTS1,LEF1,MKI67,MRC2,MYO1D,NOX5,NTRK1,PHF11,PTGER4,PTPRE,PTPRN2,PXN,RAD51C,RCAN3,TBXAS1,VAMP5,WIF1	29 (20)	18
STEAP3		transporter	CEBPA,CEBPB,Creb,CTNNB1,EIF4E,ERK1/2,GATA1,IKBKB,JUN,MAP2K1/2,MAPK1,MED1,MKNK1,MTOR,NFkB (complex),PRKAA1,RARA,RELA,SP1,STAT3,STEAP3	3		-0.169	0.0255	0.0481	AP3M2,CLEC4E,COBL,COPG2,DBP,FAM186A,HECW2,HNRNPU,IGF2R,INTS1,ISLR2,JAZF1,JPT1,KCNQ3,KLHL29,LEF1,MAPT,MKI67,MYO1D,NELL2,NMI,NOX5,NTRK1,PHF11,PTGER4,PTPRE,PXN,RCAN3,RPA3,STX12,TBXAS1,TMCC1,UBE4A,WIF1,ZNF366	35 (21)	19
KISS1R		G-protein coupled receptor	Cdc42,Creb,CREB1,CTNNB1,EGFR,EGR1,FOXO1,Jnk,JUN,KISS1R,Mapk,MAPK1,MAPK14,NFkB (complex),PARP1,PI3K (family),PLC,RELA,SP1,STAT3,STAT6	3		1.461	0.0249	0.0314	AP3M2,CAD,CDC42EP3,CDK5RAP3,CLEC4E,COBL,COPG2,DBP,HNRNPU,IGF2R,INTS1,KCNQ3,LAMP1,LEMD3,MKI67,MRC2,NELL2,NMI,NOX5,PHF11,POU2F1,PTGER4,PTPRE,PXN,RCAN3,SLC12A2,TMEM131,WIF1,ZEB2,ZNF608	30 (21)	19
RLIM		enzyme	EGFR,MTOR,P38 MAPK,RB1,RELA,RLIM,SMAD2,Smad2/3,SMAD7,STAT3	3		1.606	0.0243	0.0189	AP3M2,CD82,CHCHD3,COBL,COPG2,DLST,GHITM,GPR63,IER3,ISLR2,LEF1,MAPT,mir-128,PTGER4,PXN,SLC12A2,STX12,TMCC1,ZEB2	19 (10)	7
NLRC4		other	CASP1,CASP7,CEBPA,estrogen receptor,IKBKB,IKK (complex),IRF3,NFkB (complex),NLRC4,P38 MAPK,RELA,TBK1,TP53	3		1.461	0.0238	0.0271	ANXA6,AP3M2,ATP5MC1,CD82,CDC42EP3,CERS6,CLEC4E,CSMD3,DBP,DLST,GPR63,IER3,LEF1,MAPT,mir-128,MKI67,MYO1D,NMI,PHF11,PSMD8,PTGER4,PTPRE,PTPRU,PXN,RAD51C,RPL7,RPTOR,TBXAS1,TRAP1,ZEB2	30 (13)	10
PTPN9		phosphatase	Creb,CREB1,EGFR,EGR1,ERBB2,ESR1,FOXO1,JUN,Mapk,MAPK1,MXD1,NFkB (complex),PARP1,PI3K (family),PTPN9,RB1,RELA,SP1,STAT3,STAT5a/b,STAT6,TP63	3		-1.808	0.0236	0.0476	AP3M2,CAD,CDC14B,CDC42EP3,CDK5RAP3,CHCHD3,CLEC4E,COBL,COPG2,COX7A2L,DBP,DLST,FAM186A,GHITM,GPR63,HNRNPU,IGF2R,INTS1,KCNQ3,LAMP1,LEMD3,MKI67,NELL2,NMI,NOX5,NTRK1,PHF11,POU2F1,PTGER4,PTPRE,PTPRU,PXN,RCAN3,SLC12A2,TMEM131,ZEB2,ZNF608	37 (22)	21
HNRNPK		other	CEBPA,CEBPB,Creb,CTNNB1,EIF4E,ERK1/2,GATA1,HNRNPK,IKBKB,JUN,MAP2K1/2,MAPK1,MED1,MKNK1,MTOR,NFkB (complex),PRKAA1,RARA,RELA,SP1,STAT3	3		0.169	0.023	0.0435	AP3M2,CLEC4E,COBL,COPG2,DBP,FAM186A,HECW2,HNRNPU,IGF2R,INTS1,ISLR2,JAZF1,JPT1,KCNQ3,KLHL29,LEF1,MAPT,MKI67,MYO1D,NELL2,NMI,NOX5,NTRK1,PHF11,PTGER4,PTPRE,PXN,RCAN3,RPA3,STX12,TBXAS1,TMCC1,UBE4A,WIF1,ZNF366	35 (21)	19
ADAM15		peptidase	ADAM15,Cdc42,Creb,CREB1,CTNNB1,EGFR,EGR1,EIF4E,FOXO1,Jnk,JUN,MAPK1,MAPK14,MMP9,MTOR,NFkB (complex),PARP1,PI3K (family),SP1,STAT3,STAT6,TGFB1	3		0.707	0.0227	0.0374	CAD,CDC42EP3,CDK5RAP3,CLEC4E,COBL,COPG2,HNRNPU,IGF2R,INTS1,ISLR2,KCNQ3,LAMP1,LEMD3,MAPT,MKI67,MRC2,NELL2,NMI,NOX5,PHF11,POU2F1,PTPRE,PXN,RCAN3,SLC12A2,STX12,TMCC1,TMEM131,UBE4A,WIF1,ZEB2,ZNF608	32 (22)	20
alpha-adrenergic receptor		group	alpha-adrenergic receptor,CEBPA,CEBPB,Creb,CTNNB1,EIF4E,ERK1/2,GATA1,IKBKB,JUN,MAP2K1/2,MAPK1,MED1,MKNK1,MTOR,NFkB (complex),PRKAA1,RARA,RELA,RPS6KA1,SP1,STAT3	3		0.169	0.0223	0.042	AP3M2,CLEC4E,COBL,COPG2,DBP,FAM186A,HECW2,HNRNPU,IGF2R,INTS1,ISLR2,JAZF1,JPT1,KCNQ3,KLHL29,LEF1,MAPT,MKI67,MYO1D,NELL2,NMI,NOX5,NTRK1,PHF11,PTGER4,PTPRE,PXN,RCAN3,RPA3,STX12,TBXAS1,TMCC1,UBE4A,WIF1,ZNF366	35 (22)	19
PAPSS1-BRAF		fusion gene/product	CEBPA,CEBPB,Creb,CTNNB1,EIF4E,ERK1/2,GATA1,IKBKB,JUN,MAP2K1/2,MAPK1,MED1,MKNK1,MTOR,NFkB (complex),PAPSS1-BRAF,PRKAA1,RARA,RELA,SP1,STAT3	3		0.169	0.0222	0.0425	AP3M2,CLEC4E,COBL,COPG2,DBP,FAM186A,HECW2,HNRNPU,IGF2R,INTS1,ISLR2,JAZF1,JPT1,KCNQ3,KLHL29,LEF1,MAPT,MKI67,MYO1D,NELL2,NMI,NOX5,NTRK1,PHF11,PTGER4,PTPRE,PXN,RCAN3,RPA3,STX12,TBXAS1,TMCC1,UBE4A,WIF1,ZNF366	35 (21)	19
TESPA1		other	ERK1/2,GRB2,Jnk,LCP2,Mapk,MAPK14,NCL,NFkB (complex),P38 MAPK,PIK3R2,PLCG1,PLCG2,PTEN,TESPA1	3		-0.775	0.0222	0.0132	CD82,CLEC4E,DBP,GPR63,IER3,LAMP1,LEF1,MKI67,MRC2,NOX5,NTRK1,PTPRE,RAD51C,UBE4A,WIF1	15 (14)	11
GRAP2		other	CEBPA,ERK1/2,estrogen receptor,GRAP2,IKBKB,IKK (complex),Jnk,LCP2,NCL,NFkB (complex),P38 MAPK,PIK3R2,PLCG1,PLCG2,RELA,TP53	3		0.898	0.0219	0.0278	ANXA6,AP3M2,ATP5MC1,CD82,CDC42EP3,CERS6,CLEC4E,CSMD3,DBP,DLST,GPR63,IER3,LAMP1,LEF1,MAPT,mir-128,MKI67,MRC2,MYO1D,NOX5,PSMD8,PTGER4,PTPRE,PTPRU,PXN,RAD51C,RPL7,TBXAS1,TRAP1,UBE4A,ZEB2	31 (16)	14
PRKACG		kinase	BRAF,CEBPA,CEBPB,Creb,CTNNB1,ERK1/2,GATA1,JUN,Mapk,MAPK1,MED1,MTOR,NFkB (complex),PRKAA1,PRKACG,RELA,SP1,STAT3	3		-0.18	0.0216	0.0256	AP3M2,CLEC4E,COBL,COPG2,DBP,HECW2,HNRNPU,IGF2R,INTS1,ISLR2,JAZF1,JPT1,KCNQ3,KLHL29,LEF1,LEMD3,MAPT,MKI67,NMI,NOX5,PHF11,PTGER4,PTPRE,PXN,RCAN3,RPA3,STX12,TBXAS1,TMCC1,WIF1,ZNF366	31 (18)	16
SP1		transcription regulator	CDKN2A,ERK1/2,HDAC1,HDAC2,HDAC3,HDAC4,Hsp27,KDM1A,KDM5A,KDM5B,MAPK1,MTOR,NFkB (complex),P38 MAPK,PPARG,RAS,RB1,SP1,TLR9,UGDH	3		-1.89	0.0211	0.0212	BBS9,CAD,CD82,CERS6,CHCHD3,CLEC4E,DLST,FOXN4,GHITM,GLRX3,GPR63,ISLR2,KCNQ3,MAPT,MKI67,NMI,NOX5,NTRK1,PHF11,PTPRE,PXN,RCAN3,SLC12A2,STX12,TBXAS1,TMCC1,VAMP5,ZEB2	28 (20)	14
FIP1L1-PDGFRA		fusion gene/product	CEBPA,CEBPB,Creb,CTNNB1,EGFR,ERK1/2,FCGR2B,FIP1L1-PDGFRA,FYN,GATA1,IRF3,Jnk,JUN,LYN,MAPK14,MED1,MTOR,NFkB (complex),PRKAA1,RELA,SP1,STAT3,STAT5a/b,SYK	3		-0.354	0.0211	0.0318	AP3M2,CAD,CLEC4E,COBL,COPG2,DBP,HECW2,HNRNPU,IGF2R,INTS1,ISLR2,JAZF1,JPT1,KCNQ3,KLHL29,KLHL31,LEF1,LEMD3,MAPT,MKI67,MRC2,NOX5,PHF11,PTGER4,PTPRE,PXN,RPA3,RPTOR,STX12,TBXAS1,TMCC1,ZNF366	32 (24)	22
CLTC		other	CEBPA,CLTC,EIF4E,ERK1/2,estrogen receptor,FGFR1,GAB1,IKBKB,IKK (complex),MAPK1,NFkB (complex),RELA,STAT3,TP53	3		0.707	0.0208	0.036	ANXA6,AP3M2,ATP5MC1,CDC42EP3,CERS6,CLEC4E,COBL,COPG2,CSMD3,DBP,DLST,GPR63,IER3,LEF1,MAPT,mir-128,MYO1D,NMI,NOX5,PHF11,PSMD8,PTGER4,PTPRE,PTPRU,PXN,RAD51C,RCAN3,RPL7,TBXAS1,TRAP1,UBE4A,ZEB2	32 (14)	11
NLRP1		enzyme	CASP1,CEBPA,estrogen receptor,IKBKB,IKK (complex),IRF3,NFkB (complex),NLRP1,P38 MAPK,RELA,TBK1,TP53	3		1.461	0.0204	0.0227	ANXA6,AP3M2,ATP5MC1,CD82,CDC42EP3,CERS6,CLEC4E,CSMD3,DBP,DLST,GPR63,IER3,LEF1,MAPT,mir-128,MKI67,MYO1D,NMI,PHF11,PSMD8,PTGER4,PTPRE,PTPRU,PXN,RAD51C,RPL7,RPTOR,TBXAS1,TRAP1,ZEB2	30 (12)	10
B4GALNT1		enzyme	B4GALNT1,Creb,EIF4E,ERK1/2,EZH2,JAK1,JAK3,MAPK1,MKNK1,NFkB (complex),RELA,STAT3,STAT5B	3		-0.626	0.0203	0.0208	ANKS1B,AP3M2,CLEC4E,COBL,COPG2,DBP,DIP2B,HDGFL3,IER3,INTS1,KLHL31,LEF1,MAPT,MKI67,NELL2,NMI,PHF11,PTGER4,PTPRE,PXN,RCAN3,UBE4A,WIF1	23 (13)	11
FADD		other	CASP8,CASP9,EGFR,ERK1/2,FADD,GATA1,GSK3B,IRF3,Jnk,JUN,MTOR,NFE2,NFkB (complex),P38 MAPK,SMPD1,TBK1	3		-0.218	0.0198	0.014	CAD,CD82,CLEC4E,DBP,HNRNPU,IGF2R,ISLR2,JAZF1,MAPT,MRC2,NMI,PHF11,PTPRE,PXN,RPTOR,SLC12A2,STX12,TBXAS1,TMCC1,ZEB2,ZNF366	21 (16)	12
DUOX2		enzyme	CCND1,DUOX2,FOXO3,H2AX,JUN,LIN28A,MAPK3,NFE2L2,PARP1,RB1,TP53	3		-0.365	0.0196	0.0345	AHI1,ANXA6,ATP5MC1,CD82,CERS6,CHCHD3,CSMD3,DBP,DLST,FUS,GABRA1,GHITM,GPR63,HNRNPU,IGF2R,JPT1,LEMD3,mir-128,NELL2,NRSN1,POU2F1,PSMC3,PSMD8,PTPRE,PTPRU,RPL7,S100A13,TRAP1,WWOX,ZEB2	30 (11)	8
STAMBP		enzyme	Cdc42,Creb,CREB1,EGFR,EGR1,F2RL1,FOXO1,HGS,Jnk,JUN,MAPK1,NFkB (complex),PARP1,PI3K (family),RELA,SP1,STAM,STAMBP,STAT3,STAT6	3		1.347	0.0194	0.0289	AP3M2,CAD,CDK5RAP3,CLEC4E,COBL,COPG2,HNRNPU,IGF2R,INTS1,KCNQ3,LAMP1,LEMD3,MKI67,MRC2,NELL2,NMI,NOX5,PHF11,POU2F1,PTGER4,PTPRE,PXN,RCAN3,SLC12A2,TMEM131,ZEB2,ZNF608	27 (20)	16
MAPK7		kinase	APP,Creb,CTNNB1,FOXO1,GATA1,IKK (complex),Jnk,JUN,MAPK7,MEF2C,MEF2D,NFE2L2,NFkB (complex),PPARG,RELA,RHOA,SGK1,STAT3,TP53	3		0.164	0.0193	0.0389	ANXA6,AP3M2,ATP5MC1,BLK,CDK5RAP3,CERS6,CLEC4E,COBL,COPG2,CSMD3,DLST,GABRA1,GPR63,HNRNPU,IGF2R,INTS1,JAZF1,LEMD3,MAPT,mir-128,MKI67,MRC2,NRSN1,PSMC3,PSMD8,PTGER4,PTPRU,PXN,RAD51C,RPL7,S100A13,TBXAS1,TRAP1,VAMP5,WIF1,ZEB2,ZNF366	37 (19)	16
ABCB4		transporter	ABCB4,CHKA,ERK1/2,ESR1,FOXO3,MAPK1,MMP13,MMP2,MTOR,RELA,SIRT1,STAT3	3		-0.626	0.0185	0.0149	AP3M2,CDC42EP3,COPG2,DBP,FAM186A,IER3,ISLR2,LEF1,LEMD3,LRCH1,MAPT,MKI67,NMI,NOX5,NTRK1,PHF11,PTGER4,PTPRE,PXN,RCAN3,SLC12A2,STX12,TMCC1	23 (12)	8
ELF1		transcription regulator	CEBPA,CEBPB,Creb,CTNNB1,ELF1,ERK1/2,GATA1,Jnk,JUN,LAT,LCP2,MAPK1,MAPK14,MED1,MTOR,NFkB (complex),P38 MAPK,PLCG2,PRKAA1,RELA,SP1,STAT3,ZAP70	3		0.354	0.0182	0.0246	AP3M2,CD82,CLEC4E,COBL,COPG2,DBP,HECW2,HNRNPU,IGF2R,INTS1,ISLR2,JAZF1,JPT1,KCNQ3,KLHL29,LAMP1,LEMD3,MAPT,MRC2,NMI,NOX5,PHF11,PTGER4,PTPRE,PXN,RCAN3,RPA3,STX12,TBXAS1,TMCC1,WIF1,ZNF366	32 (23)	20
RASGRP4		other	CEBPA,CEBPB,Creb,CTNNB1,ERK1/2,GATA1,HRAS,IKBKB,JUN,MAPK1,MED1,MTOR,NFkB (complex),PRKAA1,RASGRP4,RELA,SP1,STAT3	3		0	0.017	0.0207	AP3M2,CLEC4E,COBL,COPG2,DBP,HECW2,HNRNPU,IGF2R,INTS1,ISLR2,JAZF1,JPT1,KCNQ3,KLHL29,LEF1,LEMD3,MAPT,MKI67,MYO1D,NMI,NOX5,PHF11,PTGER4,PTPRE,PXN,RCAN3,RPA3,STX12,TBXAS1,TMCC1,WIF1,ZNF366	32 (18)	16
BCL3		transcription regulator	BCL2L11,BCL3,CEBPB,CTNNB1,CXCR4,EIF4E,ELAVL1,ERK1/2,FOXO3,GATA1,HMGA1,IKBKB,IRF3,Jnk,JUN,MAP3K8,Mapk,MAPK1,MED1,Mek,MTOR,NCL,NFkB (complex),NFKB1,PPARG,PRKAA1,RB1,RELA,SP1,STAT3,TCF7L2,XBP1	3		-0.316	0.0168	0.0428	ANKS1B,AP3M2,CDK5RAP3,CHCHD3,CLEC4E,COBL,COPG2,DBP,DLST,GHITM,GPR63,HECW2,HNRNPU,IGF2R,ISLR2,JAZF1,JPT1,KCNQ3,KLHL29,LAMP1,LEF1,LEMD3,MAPT,MRC2,MYO1D,NMI,PTGER4,PTPRE,PTPRN2,PXN,RCAN3,RPA3,RPTOR,SFXN1,STX12,TMCC1,UBE4A,VAMP5,WIF1,ZNF366	40 (32)	28
EDIL3		other	Cdc42,CEBPA,CEBPB,Creb,CTNNB1,EDIL3,ERK1/2,GATA1,GSK3B,IGF1R,Jnk,JUN,Mapk,MED1,MET,MTOR,MYD88,NFkB (complex),PAK2,PRKAA1,PTEN,PTK2,RELA,SP1,STAT3,TSC2	3		0.343	0.0164	0.0291	AP3M2,ATP5MC1,CD82,CLEC4E,COBL,COPG2,DBP,GPR63,HECW2,HNRNPU,IGF2R,INTS1,ISLR2,JAZF1,JPT1,KCNQ3,KLHL29,LAMP1,LEF1,LEMD3,MAPT,MKI67,MRC2,NTRK1,PSMC3,PTGER4,PTPRE,RPA3,SMAD9,STX12,TBXAS1,TMCC1,WIF1,ZNF366	34 (26)	24
CHI3L1		enzyme	Cdc42,CEBPA,CEBPB,CHI3L1,Creb,CTNNB1,ERK1/2,GATA1,GSK3B,IGF1R,Jnk,JUN,Mapk,MED1,MET,MTOR,MYD88,NFkB (complex),PAK2,PRKAA1,PTEN,PTK2,RELA,SP1,STAT3,TSC2	3		0.343	0.0162	0.0289	AP3M2,ATP5MC1,CD82,CLEC4E,COBL,COPG2,DBP,GPR63,HECW2,HNRNPU,IGF2R,INTS1,ISLR2,JAZF1,JPT1,KCNQ3,KLHL29,LAMP1,LEF1,LEMD3,MAPT,MKI67,MRC2,NTRK1,PSMC3,PTGER4,PTPRE,RPA3,SMAD9,STX12,TBXAS1,TMCC1,WIF1,ZNF366	34 (26)	24
PLAAT4		enzyme	CEBPA,Creb,EIF4E,estrogen receptor,IFNB1,IKBKB,IKK (complex),IRF3,MKNK1,NFkB (complex),PLAAT4,PRKCD,RELA,STAT3,TP53	3		0.667	0.0161	0.0269	ANXA6,AP3M2,ATP5MC1,CDC42EP3,CERS6,CLEC4E,COBL,COPG2,CSMD3,DBP,DLST,GPR63,IER3,INTS1,LAMP1,LEF1,MAPT,mir-128,MKI67,MYO1D,NELL2,NMI,PHF11,PSMD8,PTGER4,PTPRE,PTPRU,PXN,RAD51C,RPL7,RPTOR,SIDT1,TBXAS1,TRAP1,UBE4A,ZEB2	36 (15)	14
S100A1		other	26s Proteasome,CEBPA,Creb,CREB1,CTNNB1,ERK1/2,ERN1,ESR1,estrogen receptor,IKK (complex),MAPK1,NFkB (complex),P38 MAPK,Pka,RELA,RHO,S100A1,SLC9A1,TP53	3		0.324	0.0159	0.0359	ANXA6,AP3M2,ATP5MC1,CAD,CD82,CDC42EP3,CERS6,CLEC4E,COBL,CSMD3,DBP,DLST,FAM186A,GPR63,IER3,INTS1,LAMP1,LEF1,MAPT,mir-128,NMI,NOX5,NTRK1,PDC,PHF11,PSMD8,PTGER4,PTPRE,PTPRU,PXN,RAD51C,RCAN3,RPL7,SLC12A2,TBXAS1,TRAP1,WIF1,ZEB2	38 (19)	17
CIRBP		translation regulator	CCND1,CDK4,CDKN2A,CEBPB,CIRBP,Creb,CTNNB1,E2F3,ERK1/2,FLNA,FOXM1,GATA1,JUN,MED1,MTOR,NFkB (complex),PPARG,PRKAA1,RB1,RELA,SP1,STAT3	3		-0.686	0.0153	0.0275	AHI1,AP3M2,CHCHD3,CLEC4E,COBL,COPG2,DBP,DLST,GHITM,GPR63,HECW2,HNRNPU,IGF2R,INTS1,ISLR2,JAZF1,JPT1,KCNQ3,KLHL29,LEF1,LEMD3,MAPT,MKI67,NEAT1,PTGER4,PTPRE,PXN,RPA3,STX12,TMCC1,VAMP5,WIF1,WWOX,ZNF366	34 (22)	20
CTSS		peptidase	CASP8,CASP9,CCND1,CREB1,CTSS,EGFR,EIF4E,ERK1/2,IRF3,Mapk,MKNK1,NFkB (complex),P38 MAPK,RB1,RXRA,STAT5a/b,TBK1	3		-0.408	0.0144	0.0132	AHI1,CAD,CD82,CHCHD3,CLEC4E,DBP,DLST,GHITM,GPR63,IER3,JPT1,MAPT,MKI67,NELL2,NMI,NOX5,NTRK1,PHF11,PTPRE,PXN,RPTOR,UBE4A,WWOX,ZEB2	24 (17)	14
TRIM32		transcription regulator	CEBPA,estrogen receptor,IKBKB,IKK (complex),IRF3,NFkB (complex),RELA,STAT3,STING1,TP53,TRIM32	3		1.257	0.0144	0.0211	ANXA6,AP3M2,ATP5MC1,CD82,CDC42EP3,CERS6,CLEC4E,COBL,COPG2,CSMD3,DBP,DLST,GPR63,IER3,LEF1,MAPT,mir-128,MKI67,MYO1D,PHF11,PSMD8,PTGER4,PTPRE,PTPRU,PXN,RAD51C,RPL7,RPTOR,TBXAS1,TRAP1,ZEB2	31 (11)	9
P2RX7		ion channel	CEBPA,CEBPB,Creb,CTNNB1,ERK1/2,FOXO1,GATA1,IL1B,Inflammasome,JUN,LIN28A,MAPK1,MAPK3,MED1,MTOR,NFATC1,NFE2L2,P2RX7,PADI2,Pld,PRKAA1,RELA,SP1,STAT3	3		-1.715	0.0143	0.0255	AP3M2,CDK5RAP3,COBL,COPG2,FUS,GABRA1,HECW2,HNRNPU,IGF2R,INTS1,ISLR2,JAZF1,JPT1,KCNQ3,KLHL29,LEF1,LEMD3,MAPT,MKI67,NEAT1,NOX5,NRSN1,PHF11,PSMC3,PTGER4,PTPRE,RCAN3,RPA3,S100A13,STX12,TBXAS1,TMCC1,WIF1,ZNF366	34 (24)	19
MPL		transmembrane receptor	CEBPA,CEBPB,Creb,CTNNB1,ERK1/2,estrogen receptor,GATA1,ITGB1,JAK2,JUN,MED1,MPL,MTOR,NFkB (complex),PRKAA1,RAP1B,RELA,SP1,STAT3,STAT5A,STAT5a/b,STAT5B,TP53,TP63	3		0.781	0.0143	0.0346	ANKS1B,ANXA6,AP3M2,ATP5MC1,CERS6,CLEC4E,COBL,COPG2,CSMD3,DIP2B,DLST,GPR63,HECW2,HNRNPU,IGF2R,INTS1,ISLR2,JAZF1,JPT1,KCNQ3,KLHL29,LEF1,LEMD3,MAPT,mir-128,MKI67,NOX5,PSMD8,PTGER4,PTPRE,PTPRU,PXN,RPA3,RPL7,SIDT1,STX12,TBXAS1,TMCC1,TRAP1,WIF1,ZNF366	41 (24)	20
HMMR		transmembrane receptor	Cdc42,CEBPA,CEBPB,Creb,CREB1,CTNNB1,EGFR,ERK1/2,Focal adhesion kinase,FOXO1,GATA1,HMMR,Jnk,JUN,Mapk,MAPK1,MAPK14,MED1,MTOR,NANOG,NFkB (complex),PARP1,PI3K (family),PRKAA1,RELA,SMAD2,SP1,STAT3,STAT5a/b,STAT6,TP63	3		0	0.014	0.0269	AP3M2,CAD,CDK5RAP3,CLEC4E,COBL,COPG2,DBP,FUS,HECW2,HNRNPU,IGF2R,INTS1,ISLR2,JAZF1,JPT1,KCNQ3,KLHL29,LAMP1,MAPT,MKI67,MRC2,NELL2,NMI,NOX5,PHF11,POU2F1,PTGER4,PTPRE,PTPRU,PXN,RCAN3,RPA3,STX12,TBXAS1,TMCC1,TMEM131,WIF1,ZEB2,ZNF366,ZNF608	40 (31)	28
NCK1		kinase	Jnk,LIN28A,MAPK1,MAPK3,NCK1,NFAT5,NFE2L2,NFkB (complex),NR3C1,RAC1,RELA,RHOA,STAT3,TP53	3		-0.174	0.014	0.0233	ANXA6,AP3M2,ATP5MC1,CD82,CDC42EP3,CERS6,CLEC4E,COBL,COPG2,CSMD3,DLST,FUS,GABRA1,GPR63,HECW2,LEF1,mir-128,MKI67,MRC2,NMI,NOX5,NRSN1,PHF11,PSMC3,PSMD8,PTGER4,PTPRU,PXN,RCAN3,RPL7,S100A13,TRAP1,ZEB2	33 (14)	10
RCAN2		other	ERK1/2,Hsp27,IKK (complex),IRF3,Jnk,JUN,Map3k7,Mapk,MAPK14,NFkB (complex),P38 MAPK,PRKAA1,PRKAA2,RCAN2,RELA,TAB1	3		-1.886	0.014	0.0073	AP3M2,CD82,CDC42EP3,CLEC4E,DBP,HNRNPU,IER3,IGF2R,KLHL29,MRC2,NTRK1,PHF11,PTGER4,PTPRE,PXN,RAD51C,RPTOR,WIF1	18 (16)	13
CISH		other	CEBPA,CISH,estrogen receptor,IKBKB,IKK (complex),JAK2,Jnk,MAPK14,NCL,NFkB (complex),PLCG1,RELA,SP1,STAT3,STAT5a/b,STAT5B,TP53	3		-1.183	0.014	0.0238	ANKS1B,ANXA6,AP3M2,ATP5MC1,CDC42EP3,CERS6,CLEC4E,COBL,COPG2,CSMD3,DBP,DIP2B,DLST,FBXO31,GPR63,IER3,KCNQ3,LEF1,MAPT,mir-128,MKI67,MRC2,MYO1D,NOX5,PSMD8,PTGER4,PTPRU,PXN,RAD51C,RPL7,TBXAS1,TRAP1,UBE4A,WIF1,ZEB2	35 (17)	15
NCK2		kinase	Jnk,LIN28A,MAPK1,MAPK3,NCK2,NFAT5,NFE2L2,NFkB (complex),NR3C1,RAC1,RELA,RHOA,STAT3,TP53	3		-0.174	0.0139	0.0231	ANXA6,AP3M2,ATP5MC1,CD82,CDC42EP3,CERS6,CLEC4E,COBL,COPG2,CSMD3,DLST,FUS,GABRA1,GPR63,HECW2,LEF1,mir-128,MKI67,MRC2,NMI,NOX5,NRSN1,PHF11,PSMC3,PSMD8,PTGER4,PTPRU,PXN,RCAN3,RPL7,S100A13,TRAP1,ZEB2	33 (14)	11
GSTA4		enzyme	ATR,CHEK1,CREB1,E2F3,ERK1/2,GSTA4,H2AX,Jnk,JUN,MAPK1,NCL,NFkB (complex),PARP1,RELA,TP53	3		-0.557	0.0138	0.026	ANXA6,AP3M2,ATP5MC1,CDC42EP3,CERS6,CLEC4E,CSMD3,DLST,GPR63,HNRNPU,IGF2R,LEF1,mir-128,MRC2,NEAT1,NELL2,NMI,NOX5,PHF11,POU2F1,PSMD8,PTGER4,PTPRE,PTPRU,RCAN3,RPL7,TRAP1,UBE4A,ZEB2	29 (15)	11
TXNIP		other	CEBPA,ESR1,FOXO3,IKBKB,IKK (complex),IL1B,Inflammasome (Nalp3, Asc, Casp1),INSR,Jnk,JUN,MAP3K5,MAPK8,MTOR,MYC,NADPH oxidase,NCF1,NFkB (complex),PARP1,RELA,RICTOR,SIRT1,SP1,STAT5a/b,TFEB,TXN,TXNIP	3		0	0.0136	0.0305	AP3M2,CLEC4E,COX7A2L,DBP,FAM186A,HNRNPU,HYAL3,IER3,IGF2R,ISLR2,KCNQ3,LAMP1,LEF1,LEMD3,LRCH1,MAPT,MRC2,MYO1D,NEAT1,NELL2,NOX5,NTRK1,POU2F1,PSMC3,PTGER4,PXN,RAD51C,RTN2,SLC12A2,STX12,TBXAS1,TMCC1	32 (26)	21
CD2		transmembrane receptor	CCND1,CD2,CEBPA,CEBPB,Creb,CTNNB1,EGFR,ERK1/2,GATA1,Jnk,JUN,LAT,LCP2,Mapk,MAPK1,MAPK14,MED1,MKNK1,MTOR,PRKAA1,RB1,RELA,RXRA,SP1,STAT5a/b	3		-0.343	0.0132	0.0356	AHI1,AP3M2,CAD,CHCHD3,DBP,DLST,GHITM,GPR63,HECW2,HNRNPU,IGF2R,INTS1,ISLR2,JAZF1,KCNQ3,KLHL29,LAMP1,LEMD3,MRC2,NELL2,NMI,NOX5,NTRK1,PHF11,PTGER4,PTPRE,RCAN3,RPA3,STX12,TBXAS1,TMCC1,WIF1,WWOX,ZNF366	34 (25)	23
GPC1		transmembrane receptor	CCND1,CEBPA,CEBPB,Creb,CREB1,CTNNB1,EGFR,EIF4E,ERK1/2,GATA1,GPC1,JUN,Mapk,MED1,MKNK1,MTOR,NFkB (complex),PRKAA1,RB1,RELA,RXRA,SP1,STAT3,STAT5a/b	3		-0.507	0.0129	0.0319	AHI1,AP3M2,CAD,CHCHD3,CLEC4E,COBL,COPG2,DBP,DLST,GHITM,GPR63,HECW2,HNRNPU,IGF2R,INTS1,ISLR2,JAZF1,KCNQ3,KLHL29,LEF1,LEMD3,NELL2,NOX5,NTRK1,PTGER4,PTPRE,PXN,RPA3,STX12,TBXAS1,TMCC1,UBE4A,WIF1,WWOX,ZNF366	35 (24)	23
CCR1		G-protein coupled receptor	CCR1,CEBPA,CEBPB,Creb,CREB1,CTNNB1,EGFR,EIF4E,EP300,ERK1/2,GATA1,Hsp27,IKBKB,ITGB1,JUN,KAT5,MED1,MET,MITF,MKNK1,MTOR,NFAT5,NFkB (complex),P38 MAPK,PLA2G4A,PPARG,PPARGC1A,PRKAA1,RB1,RELA,SP1,STAT3,TP53,VIM	3		-0.885	0.0129	0.0474	ANXA6,AP3M2,ATP5MC1,CAD,CD82,CERS6,CHCHD3,CLEC4E,COBL,COPG2,CSMD3,DBP,DLST,GHITM,HECW2,HNRNPU,IER3,IGF2R,INTS1,ISLR2,JAZF1,JPT1,KCNQ3,KLHL29,LEF1,LEMD3,MAPT,mir-128,MYO1D,NELL2,NOX5,NTRK1,PSMD8,PTGER4,PTPRE,RPA3,RPL7,SIDT1,STX12,TBXAS1,TMCC1,TRAP1,UBE4A,VAMP5,WIF1,ZNF366	46 (34)	32
NMT1		enzyme	CD247,CEBPA,CEBPB,Creb,CTNNB1,ERK1/2,GATA1,JUN,LCP2,MAPK1,MAPK14,MED1,MTOR,NFkB (complex),NMT1,P38 MAPK,PRKAA1,RELA,SP1,STAT3,ZAP70	3		-0.354	0.0126	0.0151	AP3M2,CD82,CLEC4E,COBL,COPG2,DBP,HECW2,HNRNPU,IGF2R,INTS1,ISLR2,JAZF1,JPT1,KCNQ3,KLHL29,LAMP1,LEMD3,MAPT,MKI67,NMI,NOX5,PHF11,PTGER4,PTPRE,PXN,RCAN3,RPA3,STX12,TBXAS1,TMCC1,WIF1,ZNF366	32 (21)	18
NMT2		enzyme	CD247,CEBPA,CEBPB,Creb,CTNNB1,ERK1/2,GATA1,JUN,LCP2,MAPK1,MAPK14,MED1,MTOR,NFkB (complex),NMT2,P38 MAPK,PRKAA1,RELA,SP1,STAT3,ZAP70	3		-0.354	0.0126	0.0151	AP3M2,CD82,CLEC4E,COBL,COPG2,DBP,HECW2,HNRNPU,IGF2R,INTS1,ISLR2,JAZF1,JPT1,KCNQ3,KLHL29,LAMP1,LEMD3,MAPT,MKI67,NMI,NOX5,PHF11,PTGER4,PTPRE,PXN,RCAN3,RPA3,STX12,TBXAS1,TMCC1,WIF1,ZNF366	32 (21)	18
IFI16		transcription regulator	IFI16,IRF3,IRF7,JUN,NFkB (complex),RELA,STAT5a/b,TP53	3		0.756	0.0122	0.0131	ANXA6,AP3M2,ATP5MC1,CD82,CDC42EP3,CERS6,CLEC4E,CSMD3,DBP,DLST,GPR63,HNRNPU,IER3,IGF2R,LEF1,mir-128,MKI67,NOX5,PHF11,PSMD8,PTGER4,PTPRE,PTPRU,PXN,RPL7,RPTOR,TRAP1,ZEB2	28 (8)	7
RACGAP1		transporter	CCND1,FOXO3,Jnk,JUN,NFAT5,NFkB (complex),RAC1,RACGAP1,RB1,RELA,RHOA,STAT3,TP53	3		-1.257	0.0122	0.0177	AHI1,ANXA6,AP3M2,ATP5MC1,CD82,CERS6,CHCHD3,CLEC4E,COBL,COPG2,CSMD3,DLST,GHITM,GPR63,HECW2,HNRNPU,IGF2R,JPT1,LEF1,LEMD3,mir-128,MKI67,MRC2,PSMD8,PTGER4,PTPRU,PXN,RPL7,TRAP1,WWOX,ZEB2	31 (13)	10
mir-10		microRNA	CASP9,Cdc42,CEBPA,CEBPB,Creb,CREB1,CTNNB1,EGFR,ERK1/2,FOXO1,GATA1,Jnk,JUN,MAPK1,MAPK14,MED1,mir-10,MTOR,NFkB (complex),PARP1,PI3K (family),PRKAA1,RELA,SP1,STAT3,STAT6,TP63	3		-0.16	0.0122	0.0268	AP3M2,CAD,CDK5RAP3,CLEC4E,COBL,COPG2,HECW2,HNRNPU,IGF2R,INTS1,ISLR2,JAZF1,JPT1,KCNQ3,KLHL29,LAMP1,MAPT,MKI67,MRC2,NELL2,NMI,PHF11,POU2F1,PSMD8,PTGER4,PTPRE,PTPRU,PXN,RCAN3,RPA3,STX12,TBC1D1,TBXAS1,TMCC1,TMEM131,WIF1,ZEB2,ZNF366,ZNF608	39 (27)	26
UBASH3A		enzyme	CEBPA,CEBPB,Creb,CTNNB1,ERK1/2,GATA1,Jnk,JUN,LAT,LCP2,Mapk,MAPK1,MAPK14,MED1,MTOR,NCL,NFkB (complex),P38 MAPK,PLCG1,PLCG2,PRKAA1,RELA,SP1,STAT3,UBASH3A,ZAP70	3		0.522	0.0122	0.0147	AP3M2,CD82,CLEC4E,COBL,COPG2,DBP,HECW2,HNRNPU,IGF2R,INTS1,ISLR2,JAZF1,JPT1,KCNQ3,KLHL29,LAMP1,LEMD3,MAPT,MRC2,NMI,NOX5,PHF11,PTGER4,PTPRE,PXN,RCAN3,RPA3,STX12,TBXAS1,TMCC1,UBE4A,WIF1,ZNF366	33 (26)	22
PLPP1	0.61	phosphatase	Cdc42,Creb,CREB1,CTNNB1,EGFR,EGR1,FOXO1,ITGB1,Jnk,JUN,Mapk,MAPK1,MAPK14,NFkB (complex),PARP1,PI3K (family),PLPP1,RAP1A,SP1,STAT3,STAT6	3		-0.928	0.012	0.0161	CAD,CDC42EP3,CDK5RAP3,CLEC4E,COBL,COPG2,DBP,HNRNPU,IGF2R,INTS1,KCNQ3,LAMP1,LEMD3,MKI67,MRC2,NELL2,NMI,NOX5,PHF11,POU2F1,PTPRE,PXN,RCAN3,SIDT1,SLC12A2,TMEM131,WIF1,ZEB2,ZNF608	29 (21)	19
SNX27		other	EIF4E,EIF4EBP1,ESR1,FOXO3,GSK3B,MTOR,MYC,NFkB (complex),RICTOR,SIRT1,SNX27,STAT5a/b,TFEB,TP53	3		-0.169	0.0119	0.029	ANXA6,ATP5MC1,CAD,CD82,CDC42EP3,CERS6,CLEC4E,COX7A2L,CSMD3,DBP,DLST,FAM186A,GPR63,HNRNPU,IER3,ISLR2,LAMP1,LEMD3,LRCH1,MAPT,mir-128,NOX5,NTRK1,PHF11,PSMC3,PSMD8,PTPRU,PXN,RTN2,SLC12A2,STX12,TMCC1,TRAP1,UBE4A,ZEB2	35 (14)	12
SEMA3A		other	AR,Cdc42,CREB1,EGFR,EIF4E,ESR1,FOXO1,FOXO3,ITGA2B,ITGB3,Jnk,LCP2,MAPK1,MAPK14,MTOR,NFAT5,NFkB (complex),PLCG2,PTEN,RAC1,RELA,SEMA3A,SIRT1,STAT3,STAT5a/b,SYK,TCF,TSC2	3		-0.343	0.0117	0.0309	AP3M2,CAD,CDC42EP3,CDK5RAP3,CLEC4E,COBL,COPG2,FAM186A,GPR63,HECW2,IER3,ILDR2,ISLR2,KLHL31,LAMP1,LEF1,LEMD3,LRCH1,MRC2,NMI,NOX5,NTRK1,PHF11,PITRM1,PSMC3,PTGER4,PXN,RAD51C,RCAN3,SLC12A2,STX12,TMCC1,UBE4A,WIF1	34 (28)	24
Hoxb3os		transcription regulator	EIF4E,EIF4EBP1,ESR1,FOXO3,GSK3B,Hoxb3os,MTOR,MYC,NFkB (complex),RICTOR,SIRT1,STAT5a/b,TFEB,TP53	3		0.169	0.0116	0.0288	ANXA6,ATP5MC1,CAD,CD82,CDC42EP3,CERS6,CLEC4E,COX7A2L,CSMD3,DBP,DLST,FAM186A,GPR63,HNRNPU,IER3,ISLR2,LAMP1,LEMD3,LRCH1,MAPT,mir-128,NOX5,NTRK1,PHF11,PSMC3,PSMD8,PTPRU,PXN,RTN2,SLC12A2,STX12,TMCC1,TRAP1,UBE4A,ZEB2	35 (14)	12
PPP3CA		phosphatase	APP,Calcineurin protein(s),Creb,ERK1/2,IKK (complex),ITGB4,Jnk,Mapk,MET,MYD88,NFATC2,P38 MAPK,PPP3CA,RELA,STAT3,TLR2,TLR4	3		1.147	0.0115	0.0096	AP3M2,CD82,CERS6,COBL,COPG2,DBP,HNRNPU,IER3,INTS1,KCNQ3,MAPT,MKI67,MRC2,NMI,PTGER4,PTPRE,PXN,RAD51C,ZEB2	19 (17)	15
SMG1		kinase	CEBPA,CEBPB,Creb,CTNNB1,ERK1/2,GATA1,JUN,LIN28A,MAPK1,MAPK3,MED1,MTOR,NFE2L2,NFkB (complex),PRKAA1,RELA,SMG1,SP1,STAT3	3		-0.507	0.0114	0.0154	AP3M2,CLEC4E,COBL,COPG2,DBP,FUS,GABRA1,HECW2,HNRNPU,IGF2R,INTS1,ISLR2,JAZF1,JPT1,KCNQ3,KLHL29,LEF1,LEMD3,MAPT,NMI,NOX5,NRSN1,PHF11,PSMC3,PTGER4,PTPRE,PXN,RCAN3,RPA3,S100A13,STX12,TBXAS1,TMCC1,WIF1,ZNF366	35 (19)	17
GATM		enzyme	AMPK,ESR1,FOXO3,GATM,GSK3B,HSF1,Jnk,MAPK1,MED1,MKNK1,MTOR,MYC,NFkB (complex),PRKAA2,RB1,RICTOR,SIRT1,STAT3,TFEB,TP53,YAP1	3		0.632	0.0113	0.0352	ANXA6,ATP5MC1,CD82,CDC42EP3,CERS6,CHCHD3,CLEC4E,COBL,COPG2,COX7A2L,CSMD3,DBP,FAM186A,GHITM,GPR63,HECW2,HNRNPU,IER3,ISLR2,KLHL29,LAMP1,LEMD3,LRCH1,MAPT,mir-128,MRC2,NELL2,NMI,NTRK1,PSMC3,PSMD8,PTPRU,PXN,RCAN3,RTN2,SLC12A2,STX12,TMCC1,TRAP1,ZEB2	40 (21)	19
Hmgb1		transcription regulator	CCND1,CEBPA,Creb,CTNNB1,EIF4E,estrogen receptor,FOXO3,Hmgb1,IKBKB,IKK (complex),JUN,MMP9,MTOR,NFkB (complex),PPARG,RB1,RELA	3		1.461	0.0112	0.0188	AHI1,AP3M2,CHCHD3,CLEC4E,DBP,DLST,GHITM,GPR63,HNRNPU,IER3,IGF2R,INTS1,ISLR2,JPT1,LEF1,LEMD3,MAPT,MYO1D,PTGER4,PXN,RAD51C,SLC12A2,STX12,TBXAS1,TMCC1,UBE4A,VAMP5,WIF1,WWOX,ZEB2	30 (17)	15
AMBRA1		other	AMBRA1,CCND1,CHEK1,Jnk,MTOR,MYC,NFkB (complex),P38 MAPK,PPARG,RB1,RELA,SMAD4,STAT3,TP53	3		0.822	0.0111	0.0214	AHI1,ANXA6,AP3M2,ATP5MC1,CAD,CD82,CDC42EP3,CERS6,CHCHD3,CLEC4E,COBL,COPG2,CSMD3,DBP,GHITM,GPR63,HNRNPU,IER3,ISLR2,JPT1,LEMD3,mir-128,MKI67,MRC2,PSMD8,PTGER4,PTPRU,RPL7,RTN2,SLC12A2,STX12,TBXAS1,TMCC1,TRAP1,VAMP5,WWOX,ZEB2	37 (14)	12
CAST		peptidase	26s Proteasome,APP,AR,Calcineurin protein(s),CAPN1,CAST,CDK5,Creb,ERBB2,GSK3B,IKK (complex),ITGB1,JUN,MAPK1,MAPT,MTOR,NFkB (complex),PPARG,TP53	3		-1.808	0.0111	0.0286	ANXA6,ATP5MC1,CD82,CDC14B,CERS6,CLEC4E,CSMD3,DBP,GPR63,HNRNPU,IER3,IGF2R,ILDR2,INTS1,ISLR2,KCNQ3,LAMP1,MAPT,mir-128,MKI67,NMI,PHF11,PITRM1,PSMD8,PTPRU,PXN,RAD51C,RCAN3,RPL7,SIDT1,SLC12A2,STX12,TBXAS1,TMCC1,TRAP1,VAMP5,ZEB2	37 (19)	15
CD24		other	CCND1,CD24,CREB1,EGFR,EIF4E,FCGR2B,FYN,IRF3,Jnk,LYN,Mapk,MKNK1,NFkB (complex),PLCG2,RB1,RXRA,STAT5a/b,SYK	3		-0.6	0.011	0.0157	AHI1,CAD,CHCHD3,CLEC4E,DBP,DLST,GHITM,GPR63,IER3,JPT1,KLHL31,MAPT,MKI67,MRC2,NELL2,NOX5,NTRK1,PHF11,PXN,RPTOR,RSBN1,UBE4A,VPS13B,WWOX,ZEB2	25 (18)	17
PIK3C2A		kinase	Creb,CTNNB1,EGFR,ERK1/2,ERN1,FOXO1,GSK3B,MTOR,MTORC1,NFkB (complex),PIK3C2A,RELA,RICTOR,SMAD2,SMAD3,SREBF1,STAT3,STK11	3		-1.134	0.0107	0.0101	AP3M2,ATP5MC1,CAD,CD82,CDC42EP3,CDK5RAP3,CLEC4E,COBL,COPG2,COX7A2L,DBP,IER3,INTS1,ISLR2,KLHL29,LEMD3,MAPT,PHF11,PSMC3,PSMD8,PTGER4,PTPRE,RPL7,S100A13,SLC12A2,STX12,TMCC1,WIF1	28 (18)	14
HSPB6		other	CEBPA,CEBPB,Creb,CREB1,EGFR,EIF4E,ELAVL1,EP300,FOXO1,HMGA1,Hsp27,HSPB6,IKBKB,IRF3,Jnk,KAT5,MAP3K5,MET,MITF,MKNK1,MTOR,MYC,NCF1,NCL,NFAT5,NFkB (complex),P38 MAPK,PI3K (family),PLA2G4A,PPARG,PPARGC1A,RB1,RELA,SP1,SREBF1,STAT3,SYK	3		0.48	0.0107	0.0303	AP3M2,CAD,CD82,CDK5RAP3,CHCHD3,CLEC4E,COBL,COPG2,GHITM,HECW2,HNRNPU,HYAL3,IER3,INTS1,ISLR2,JPT1,KCNQ3,KLHL31,LEF1,MAPT,MRC2,MYO1D,NELL2,NOX5,NTRK1,PHF11,PTGER4,PTPRN2,PXN,RPA3,RPTOR,RTN2,S100A13,SFXN1,STX12,TBXAS1,TMCC1,UBE4A,VAMP5	39 (37)	35
ADGRG3		G-protein coupled receptor	ADGRG3,Creb,CTNNB1,EGFR,ERK1/2,IGF1R,ITGB1,Mapk,MAPK1,MTOR,NFkB (complex),P38 MAPK,PAK4,PI3K (family),PXN,RELA,STAT3,STAT5a/b,TP53	3		-0.845	0.0104	0.0269	ANXA6,AP3M2,CAD,CDC42EP3,CERS6,CLEC4E,COBL,COPG2,CSMD3,DBP,DLST,GPR63,IER3,IGF2R,INTS1,ISLR2,LEF1,MAPT,mir-128,NMI,NOX5,PHF11,PSMD8,PTGER4,PTPRE,PTPRU,PXN,RCAN3,RPL7,SIDT1,SLC12A2,STX12,TMCC1,TRAP1,WIF1	35 (19)	16
SLC7A5		transporter	Creb,ESR1,FOXO3,HSF1,MTOR,MTORC1,MYC,NFkB (complex),RELA,RICTOR,SIRT1,SLC7A5,SREBF1,STAT3,STAT5a/b,TFEB,TP53	3		-1.441	0.0104	0.0268	ANXA6,AP3M2,ATP5MC1,CAD,CDC42EP3,CERS6,CLEC4E,COBL,COPG2,COX7A2L,CSMD3,DBP,DLST,FAM186A,GPR63,HNRNPU,IER3,INTS1,ISLR2,LAMP1,LEF1,LEMD3,LRCH1,MAPT,mir-128,NOX5,NTRK1,PHF11,PSMC3,PSMD8,PTGER4,PTPRU,RTN2,S100A13,SLC12A2,STX12,TMCC1,TRAP1,ZEB2	39 (17)	15
GPRIN2		other	CEBPA,CEBPB,Creb,CTNNB1,ERK1/2,GATA1,GPRIN2,JUN,MAPK1,MED1,MTOR,NFkB (complex),P38 MAPK,PRKAA1,PTEN,RELA,SP1,SPRY2,STAT3	3		0	0.0103	0.0172	AP3M2,CD82,CLEC4E,COBL,COPG2,DBP,GPR63,HECW2,HNRNPU,IGF2R,INTS1,ISLR2,JAZF1,JPT1,KCNQ3,KLHL29,LEF1,LEMD3,MAPT,MKI67,NMI,NOX5,NTRK1,PHF11,PTGER4,PTPRE,RAD51C,RCAN3,RPA3,STX12,TBXAS1,TMCC1,WIF1,ZNF366	34 (19)	17
DEF6		other	CEBPA,CEBPB,Creb,CTNNB1,DEF6,ERK1/2,GATA1,Jnk,JUN,MAPK14,MED1,MTOR,NFAT5,NFkB (complex),PRKAA1,RAC1,RELA,RHOA,SP1,STAT3,STAT5a/b,TP53	3		-0.48	0.0103	0.0231	ANXA6,AP3M2,ATP5MC1,CERS6,CLEC4E,COBL,COPG2,CSMD3,DLST,GPR63,HECW2,HNRNPU,IGF2R,INTS1,ISLR2,JAZF1,JPT1,KCNQ3,KLHL29,LEMD3,MAPT,mir-128,MKI67,MRC2,NOX5,PSMD8,PTGER4,PTPRE,PTPRU,PXN,RPA3,RPL7,STX12,TBXAS1,TMCC1,TRAP1,WIF1,ZEB2,ZNF366	39 (22)	20
BGN		other	BGN,CASP1,ERK1/2,ERN1,IRF3,MTOR,NFkB (complex),P38 MAPK,SMAD2,STAT3,TBK1	3		1.213	0.0103	0.0031	CAD,CD82,CLEC4E,COBL,COPG2,DBP,IER3,ISLR2,MAPT,NMI,PHF11,PTPRE,PXN,RPTOR,SLC12A2,STX12,TMCC1	17 (11)	8
GPX4		enzyme	CEBPA,CEBPB,Creb,CTNNB1,ERK1/2,estrogen receptor,GATA1,GPX4,IKBKB,IKK (complex),MED1,MTOR,NFkB (complex),PRKAA1,RELA,SP1,STAT3,STAT5a/b,TP53	3		0.632	0.0102	0.0243	ANXA6,AP3M2,ATP5MC1,CD82,CERS6,CLEC4E,COBL,COPG2,CSMD3,DBP,DLST,GPR63,HECW2,IER3,INTS1,ISLR2,JAZF1,JPT1,KCNQ3,KLHL29,LEF1,LEMD3,MAPT,mir-128,MYO1D,NOX5,PSMD8,PTGER4,PTPRE,PTPRU,PXN,RAD51C,RPA3,RPL7,STX12,TBXAS1,TMCC1,TRAP1,WIF1,ZNF366	40 (19)	18
IGF2R	-0.668	transmembrane receptor	CD247,CD3,CEBPB,CTNNB1,EGFR,ERBB2,ERK1/2,FYN,GATA1,Hsp27,IGF2R,IKK (complex),ITGB1,JUN,LAT,MAPK1,MAPK14,MED1,MTOR,NFkB (complex),P38 MAPK,PAK2,PPARG,PRKAA1,RB1,RELA,REN,RICTOR,Smad2/3,STAT3,STAT6,TGFB1,TGM2,TP53,ZAP70	3		-0.714	0.00995	0.041	ANXA6,AP3M2,ATP5MC1,CAD,CD82,CDC14B,CERS6,CHCHD3,CLEC4E,COBL,COPG2,COX7A2L,CSMD3,DBP,GHITM,GPR63,HECW2,HNRNPU,IER3,ISLR2,JAZF1,JPT1,KLHL29,LAMP1,LEMD3,MAPT,mir-128,NTRK1,PSMC3,PSMD8,PTGER4,PTPRE,PTPRU,PXN,RAD51C,RCAN3,RPA3,SH2D2A,SIDT1,SMAD9,STX12,TMCC1,TMEM131,TRAP1,VAMP5,WIF1,ZEB2,ZNF366,ZNF608	49 (35)	30
PTX3		other	CEBPA,CEBPB,Creb,CTNNB1,ERK1/2,estrogen receptor,GATA1,IKBKB,IKK (complex),MED1,MTOR,NFkB (complex),PRKAA1,PTX3,RELA,SP1,STAT3,STAT5a/b,TP53	3		-0.632	0.00979	0.0226	ANXA6,AP3M2,ATP5MC1,CD82,CERS6,CLEC4E,COBL,COPG2,CSMD3,DBP,DLST,GPR63,HECW2,IER3,INTS1,ISLR2,JAZF1,JPT1,KCNQ3,KLHL29,LEF1,LEMD3,MAPT,mir-128,MYO1D,NOX5,PSMD8,PTGER4,PTPRE,PTPRU,PXN,RAD51C,RPA3,RPL7,STX12,TBXAS1,TMCC1,TRAP1,WIF1,ZNF366	40 (19)	18
WNK2		kinase	CDKN1B,CEBPA,CEBPB,Creb,CTNNB1,EGFR,ERBB2,ERK1/2,FOXO1,GATA1,IKK (complex),JUN,MAP2K1,MAPK1,MED1,MTOR,NDRG1,NFkB (complex),NR4A1,PRKAA1,RELA,SGK1,SP1,STAT3,STK11,WNK2	3		1.151	0.00975	0.0209	AP3M2,ATP5MC1,CAD,CD82,CDC14B,CDK5RAP3,COBL,COPG2,DBP,DLST,HECW2,HNRNPU,IGF2R,INTS1,ISLR2,JAZF1,JPT1,KCNQ3,KLHL29,LAMP1,LEMD3,MAPT,MKI67,NOX5,PHF11,PTGER4,PTPRE,PXN,RAD51C,RCAN3,RPA3,STX12,TBXAS1,TMCC1,TMEFF2,WIF1,ZNF366	37 (26)	24
PTHLH		other	ADCY,AR,CCND1,Cdc42,CDK1,CDKN1B,CTNNB1,CYP19A1,EGFR,EIF4E,EZH2,HRAS,IKBKB,Jnk,Mapk,MAPK1,MAPK14,MKNK1,NFkB (complex),PAK2,PRKAA1,PRKAA2,PTHLH,PTK2,RB1,RELA,SOX2,STAT3,STAT5B,STAT6,STK11,TSC2	3		0	0.0096	0.037	AHI1,ANKS1B,AP3M2,CAD,CHCHD3,CLEC4E,COBL,COPG2,DBP,DIP2B,GHITM,HDGFL3,ILDR2,JPT1,KLHL29,LAMP1,MRC2,MYO1D,NELL2,NMI,PHF11,PITRM1,PSMC3,PTGER4,PXN,RCAN3,S100A13,SEMA5A,SLC12A2,SMAD9,TMEFF2,TMEM131,UBE4A,WIF1,WWOX,ZNF608	36 (32)	27
TRIM8		enzyme	CEBPA,CEBPB,Creb,CREB1,CTNNB1,EGFR,EIF4E,EP300,ERK1/2,estrogen receptor,Hsp27,IKBKB,IKK (complex),IRF3,JINK1/2,Jnk,JUN,KAT5,Map3k7,MET,MITF,MKNK1,MTOR,NFAT5,NFkB (complex),P38 MAPK,PARP1,PLA2G4A,PPARG,PPARGC1A,PRKAA1,PRKAA2,RB1,RELA,SP1,TP53,TRIM8	3		-0.885	0.00947	0.0313	ANXA6,AP3M2,ATP5MC1,CAD,CD82,CERS6,CHCHD3,CLEC4E,CSMD3,DBP,DLST,GHITM,HECW2,HNRNPU,IER3,IGF2R,INTS1,ISLR2,JPT1,KCNQ3,KLHL29,LEF1,LEMD3,MAPT,mir-128,MRC2,MYO1D,NOX5,NTRK1,PHF11,POU2F1,PSMD8,PTGER4,PTPRE,PXN,RAD51C,RPA3,RPL7,RPTOR,STX12,TBXAS1,TMCC1,TRAP1,UBE4A,VAMP5,WIF1	46 (37)	34
CCR5		G-protein coupled receptor	CASP8,CCR5,CEBPA,Creb,CXCR3,EIF4E,EIF4EBP1,estrogen receptor,IKBKB,IKK (complex),IRF3,LCP2,MAPK1,MAPK14,MTOR,MTORC1,NFkB (complex),RICTOR,SREBF1,STAT3,TP53,ZAP70	3		0.164	0.00937	0.0194	ANXA6,ATP5MC1,CDC42EP3,CERS6,CLEC4E,COBL,COPG2,COX7A2L,CSMD3,DBP,DLST,GPR63,IER3,INTS1,ISLR2,LAMP1,MAPT,mir-128,MKI67,MYO1D,NOX5,PSMC3,PSMD8,PTPRU,PXN,RAD51C,RCAN3,RPTOR,S100A13,SLC12A2,STX12,TBXAS1,TMCC1,TRAP1,UBE4A,WIF1,ZEB2	37 (22)	16
CMKLR1		G-protein coupled receptor	AR,Cdc42,CMKLR1,Creb,CREB1,EGFR,EIF4E,ERK1/2,FOXO1,IGF1R,Jnk,MAPK1,MAPK14,MAPT,MTOR,PTEN,RELA,STAT3,STAT5a/b,STAT6,TSC2	3		0	0.00928	0.0173	AP3M2,ATP5MC1,CAD,CDC42EP3,CDK5RAP3,CERS6,COBL,COPG2,GPR63,ILDR2,INTS1,ISLR2,LAMP1,LEF1,LEMD3,MKI67,MRC2,NMI,NOX5,NTRK1,PHF11,PITRM1,PSMC3,PTGER4,PTPRE,PXN,RAD51C,RCAN3,SLC12A2,STX12,TMCC1,TMEM131,UBE4A,WIF1,ZEB2,ZNF608	36 (21)	19
FRS3		other	Cdc42,CREB1,CTNNB1,CXCR4,EGFR,EIF4E,ELAVL1,FOXO1,FRS3,HMGA1,IRF3,Jnk,JUN,Mapk,MAPK1,MAPK14,Mek,NCL,NFkB (complex),PARP1,PI3K (family),PPARG,RB1,SP1,STAT3,STAT6,TCF7L2	3		-1.151	0.00917	0.0194	ANKS1B,CAD,CDC42EP3,CDK5RAP3,CHCHD3,CLEC4E,COBL,COPG2,DBP,DLST,GHITM,GPR63,HNRNPU,IGF2R,KCNQ3,LAMP1,LEMD3,MKI67,MRC2,NELL2,NMI,NOX5,PHF11,POU2F1,PTPRE,PTPRN2,PXN,RCAN3,RPTOR,SFXN1,TBXAS1,TMEM131,UBE4A,VAMP5,WIF1,ZEB2,ZNF608	37 (27)	25
AGK		kinase	AGK,Cdc42,CEBPA,CEBPB,Creb,CREB1,CTNNB1,EGFR,ERK1/2,FOXO1,GATA1,HOXA10,JAK2,Jnk,JUN,Mapk,MAPK1,MAPK14,MED1,MTOR,NFkB (complex),PARP1,PI3K (family),PRKAA1,RELA,SP1,STAT3,STAT5a/b,STAT5B,STAT6,TP63	3		0.156	0.00915	0.0202	ANKS1B,AP3M2,CAD,CDK5RAP3,CLEC4E,COBL,COPG2,DBP,DIP2B,HECW2,HNRNPU,IGF2R,INTS1,ISLR2,JAZF1,JPT1,KCNQ3,KLHL29,LAMP1,MAPT,MKI67,MRC2,NELL2,NMI,NOX5,PHF11,POU2F1,PTGER4,PTPRE,PTPRU,PXN,RCAN3,RPA3,STX12,TBXAS1,TMCC1,TMEM131,WIF1,ZEB2,ZNF366,ZNF608	41 (31)	29
BTG2		transcription regulator	Akt,BTG2,CCND1,CDKN1B,EP300,ERBB2,ERBB3,ESR1,EZH2,FOXO1,FOXO3,IRF3,Jnk,JUN,Mapk,MAPK1,MTOR,MXD1,NFAT5,NFkB (complex),PI3K (family),PPARGC1A,RB1,RELA,RICTOR,SP1,STAT3,TP53	3		1.18	0.00906	0.0327	AHI1,ANXA6,AP3M2,ATP5MC1,CDC14B,CDC42EP3,CDK5RAP3,CERS6,CHCHD3,CLEC4E,COBL,COPG2,COX7A2L,CSMD3,DBP,DLST,FAM186A,GHITM,GPR63,HDGFL3,HECW2,HNRNPU,IGF2R,ISLR2,JPT1,KCNQ3,LAMP1,LEMD3,MAPT,mir-128,MRC2,NMI,NTRK1,PSMD8,PTGER4,PTPRU,PXN,RCAN3,RPA3,RPTOR,STX12,TMCC1,TMEFF2,TRAP1,WWOX,ZEB2	46 (28)	25
PIK3C3		kinase	Cdc42,Creb,CREB1,EGFR,EGR1,EIF4E,EIF4EBP1,FOXO1,Jnk,JUN,Mapk,MAPK1,NFkB (complex),PARP1,PI3K (family),PIK3C3,SP1,STAT3,STAT6	3		-0.756	0.00906	0.0138	CAD,CDC42EP3,CDK5RAP3,CLEC4E,COBL,COPG2,DBP,HNRNPU,IGF2R,INTS1,KCNQ3,LAMP1,LEMD3,MKI67,MRC2,NELL2,NMI,NOX5,PHF11,POU2F1,PTPRE,PXN,RCAN3,SLC12A2,TMEM131,UBE4A,ZEB2,ZNF608	28 (19)	17
USP19		peptidase	Akt,CDKN1B,EP300,EZH2,FOXO1,FOXO3,IKK (complex),IRF3,Jnk,JUN,Map3k7,Mapk,MTOR,NFAT5,NFkB (complex),PPARGC1A,PRKAA1,PRKAA2,RB1,RELA,SP1,STAT3,STAT5a/b,TSC2,USP19	3		0.354	0.00904	0.0132	AP3M2,CDC42EP3,CDK5RAP3,CHCHD3,CLEC4E,COBL,COPG2,DBP,DLST,GHITM,GPR63,HDGFL3,HECW2,HNRNPU,IGF2R,ISLR2,KCNQ3,KLHL29,LEMD3,MAPT,MRC2,NOX5,PHF11,PSMC3,PTGER4,PXN,RAD51C,RPA3,RPTOR,STX12,TMCC1,TMEFF2	32 (25)	22
GMFG		growth factor	CEBPA,CEBPB,Creb,CTNNB1,ERK1/2,GATA1,GMFG,IRF3,MED1,MTOR,NFkB (complex),PRKAA1,RELA,SP1,STAT3,STAT5a/b,TP53	3		0.801	0.00899	0.0174	ANXA6,AP3M2,ATP5MC1,CD82,CERS6,CLEC4E,COBL,COPG2,CSMD3,DBP,DLST,GPR63,HECW2,INTS1,ISLR2,JAZF1,JPT1,KCNQ3,KLHL29,LEF1,LEMD3,MAPT,mir-128,NOX5,PHF11,PSMD8,PTGER4,PTPRE,PTPRU,PXN,RPA3,RPL7,RPTOR,STX12,TBXAS1,TMCC1,TRAP1,WIF1,ZNF366	39 (17)	16
APLNR		G-protein coupled receptor	Akt,APLNR,CDKN1B,EP300,ERK1/2,EZH2,FOXO1,FOXO3,INSR,IRF3,Jnk,JUN,MTOR,NFAT5,NFkB (complex),NOS2,NOS3,PPARGC1A,RB1,RELA,SP1,STAT3,STAT5a/b,TSC2	3		-0.87	0.0088	0.0138	AP3M2,ATP5MC1,CDC42EP3,CDK5RAP3,CERS6,CHCHD3,CLEC4E,COBL,COPG2,DBP,DLST,GHITM,GPR63,HDGFL3,HECW2,HNRNPU,ISLR2,KCNQ3,LEMD3,MAPT,MRC2,NOX5,PHF11,PSMC3,PTGER4,PTPRE,PXN,RPA3,RPTOR,SFXN1,STX12,TMCC1,TMEFF2	33 (24)	21
PPARA		ligand-dependent nuclear receptor	CCND1,CDKN1B,CEBPB,CTNNB1,CYP19A1,ERBB2,ERK1/2,FOXO3,GATA1,IKBKB,IKK (complex),Jnk,JUN,MAPK1,MAPK14,MED1,MTOR,NFkB (complex),PPARA,PRKAA1,PRKAA2,RB1,SP1,STAT5B,STAT6,tyrosine kinase	3		-0.649	0.00869	0.0219	AHI1,ANKS1B,CDC14B,CHCHD3,CLEC4E,DBP,DIP2B,DLST,GHITM,GPR63,HECW2,HNRNPU,IER3,IGF2R,ISLR2,JAZF1,KCNQ3,KLHL29,LAMP1,LEMD3,MRC2,MYO1D,NMI,NOX5,PHF11,PTPRE,RAD51C,RCAN3,RPA3,STX12,TMCC1,TMEFF2,TMEM131,WIF1,WWOX,ZEB2,ZNF366,ZNF608	38 (26)	23
SPHK2		kinase	Akt,AR,CDKN1B,Creb,ELAVL1,EP300,EZH2,FOXO1,HMGA1,IRF3,Jnk,JUN,MTOR,MYC,NCL,NFAT5,NFkB (complex),PI3K (family),PPARGC1A,RB1,RELA,SIRT1,SP1,SPHK2,SREBF1,STAT3,STAT5a/b,SYK,TP53,TSC2	3		0.295	0.00866	0.0297	ANXA6,AP3M2,ATP5MC1,CAD,CDC42EP3,CDK5RAP3,CHCHD3,CLEC4E,COBL,COPG2,CSMD3,GHITM,GPR63,HDGFL3,HECW2,IER3,IGF2R,ILDR2,INTS1,ISLR2,KCNQ3,KLHL31,LEMD3,LRCH1,MAPT,mir-128,MRC2,NOX5,PHF11,PITRM1,PSMC3,PSMD8,PTGER4,PTPRN2,PTPRU,PXN,RPA3,RPTOR,RTN2,S100A13,SFXN1,STX12,TMCC1,TMEFF2,TRAP1,UBE4A	46 (30)	28
FLT4		transmembrane receptor	Akt,CDKN1B,EP300,ERK1/2,EZH2,FLT4,FOXO1,FOXO3,INSR,IRF3,Jnk,JUN,MTOR,NFAT5,NFkB (complex),NOS2,NOS3,PPARGC1A,RB1,RELA,SP1,STAT3,STAT5a/b,TSC2	3		-0.87	0.00864	0.0134	AP3M2,ATP5MC1,CDC42EP3,CDK5RAP3,CERS6,CHCHD3,CLEC4E,COBL,COPG2,DBP,DLST,GHITM,GPR63,HDGFL3,HECW2,HNRNPU,ISLR2,KCNQ3,LEMD3,MAPT,MRC2,NOX5,PHF11,PSMC3,PTGER4,PTPRE,PXN,RPA3,RPTOR,SFXN1,STX12,TMCC1,TMEFF2	33 (24)	21
NDNF		other	Akt,CDKN1B,EP300,ERK1/2,EZH2,FOXO1,FOXO3,INSR,IRF3,Jnk,JUN,MTOR,NDNF,NFAT5,NFkB (complex),NOS2,NOS3,PPARGC1A,RB1,RELA,SP1,STAT3,STAT5a/b,TSC2	3		-0.87	0.00849	0.0133	AP3M2,ATP5MC1,CDC42EP3,CDK5RAP3,CERS6,CHCHD3,CLEC4E,COBL,COPG2,DBP,DLST,GHITM,GPR63,HDGFL3,HECW2,HNRNPU,ISLR2,KCNQ3,LEMD3,MAPT,MRC2,NOX5,PHF11,PSMC3,PTGER4,PTPRE,PXN,RPA3,RPTOR,SFXN1,STX12,TMCC1,TMEFF2	33 (24)	21
CHGA		other	Akt,CDKN1B,CHGA,EP300,ERK1/2,EZH2,FOXO1,FOXO3,INSR,IRF3,Jnk,JUN,MTOR,NFAT5,NFkB (complex),NOS2,NOS3,PPARGC1A,RB1,RELA,SP1,STAT3,STAT5a/b,TSC2	3		-0.87	0.00849	0.0133	AP3M2,ATP5MC1,CDC42EP3,CDK5RAP3,CERS6,CHCHD3,CLEC4E,COBL,COPG2,DBP,DLST,GHITM,GPR63,HDGFL3,HECW2,HNRNPU,ISLR2,KCNQ3,LEMD3,MAPT,MRC2,NOX5,PHF11,PSMC3,PTGER4,PTPRE,PXN,RPA3,RPTOR,SFXN1,STX12,TMCC1,TMEFF2	33 (24)	21
DAZAP2		other	CEBPA,CEBPB,Creb,CREB1,CTNNB1,DAZAP2,EGFR,EIF4E,EP300,ERK1/2,GATA1,Hsp27,IKBKB,IRF3,JINK1/2,JUN,KAT5,MED1,MET,MITF,MKNK1,MTOR,NFAT5,NFkB (complex),P38 MAPK,PARP1,PLA2G4A,PPARG,PPARGC1A,PRKAA1,RB1,RELA,SP1,STAT3,TP53,TRAF3IP2	3		1.313	0.00847	0.0326	ANXA6,AP3M2,ATP5MC1,CAD,CD82,CERS6,CHCHD3,CLEC4E,COBL,COPG2,CSMD3,DBP,DLST,GHITM,HECW2,HNRNPU,IER3,IGF2R,INTS1,ISLR2,JAZF1,JPT1,KCNQ3,KLHL29,LEF1,LEMD3,MAPT,mir-128,MYO1D,NOX5,NTRK1,PHF11,POU2F1,PSMD8,PTGER4,PTPRE,RPA3,RPL7,RPTOR,STX12,TBXAS1,TMCC1,TRAP1,UBE4A,VAMP5,WIF1,ZNF366	47 (36)	33
ATF4		transcription regulator	AMPK,ATF4,ATF6,ERN1,FOXO3,Jnk,MAPK1,MED1,MKNK1,MTOR,NFkB (complex),PRKAA2,RB1,SLC38A2,STAT5A,STAT5B,TP53,YAP1	3		0.845	0.00834	0.0144	ANKS1B,ANXA6,ATP5MC1,CAD,CD82,CDC42EP3,CERS6,CHCHD3,CLEC4E,CSMD3,DBP,DIP2B,GHITM,GPR63,HECW2,IER3,ISLR2,KLHL29,LEMD3,mir-128,MRC2,NELL2,NMI,NOX5,PHF11,PSMD8,PTPRU,PXN,RCAN3,RPL7,SLC12A2,STX12,TMCC1,TRAP1,ZEB2	35 (18)	14
PWWP2A-ROS1		fusion gene/product	Akt,CDKN1B,EGFR,EZH2,FOXO1,FOXO3,IGF1R,IRF3,Jnk,JUN,Mapk,MTOR,NFAT5,NFkB (complex),PPARGC1A,PRKAA2,PTPN11,PWWP2A-ROS1,RB1,RELA,SP1,STAT5a/b	3		-0.186	0.00828	0.0152	AP3M2,ATP5MC1,CAD,CDC42EP3,CDK5RAP3,CHCHD3,CLEC4E,DBP,DLST,GHITM,GPR63,HDGFL3,HECW2,HNRNPU,IGF2R,ISLR2,KCNQ3,KLHL29,LEMD3,MRC2,NOX5,PHF11,PTGER4,PXN,RPA3,RPTOR,STX12,TMCC1,TMEFF2	29 (22)	19
Laminin (complex)		complex	Akt,APP,AR,BRCA1,CDK5,CDKN1B,Creb,EP300,ERBB2,EZH2,Focal adhesion kinase,FOXO1,FOXO3,IGF1R,IKBKB,IRF3,ITGB1,Jnk,KRAS,Laminin (complex),Mapk,MTOR,MXD1,MYC,NANOG,NFAT5,NFkB (complex),NOS2,NRAS,PI3K (complex),PI3K (family),PPARG,PPARGC1A,PRKAA1,RELA,STAT3,TP53,TSC2	3		0.729	0.00826	0.0415	ANXA6,AP3M2,ATP5MC1,CAMK1,CDC14B,CDC42EP3,CDK5RAP3,CERS6,CLEC4E,COPG2,COX7A2L,CSMD3,DBP,FUS,HDGFL3,HECW2,IGF2R,ILDR2,INTS1,ISLR2,KLHL29,LAMP1,LEMD3,MAPT,mir-128,MRC2,MYO1D,NPR3,PITRM1,PSMC3,PSMD8,PTGER4,PTPRU,PXN,RPA3,RPL7,RPTOR,RTN2,SFXN1,SIDT1,STX12,TBXAS1,TMCC1,TMEFF2,TRAP1,TRIM11,VAMP5	47 (38)	32
DSP		other	CEBPA,CEBPB,Creb,CTNNB1,DSP,ERK1/2,GATA1,GJA1,HMOX1,HNF4A,JUN,LEF1,MED1,MTOR,NFkB (complex),PRKAA1,RB1,RELA,SP1,STAT3,TP53	3		0	0.00824	0.0212	ANXA6,AP3M2,ATP5MC1,CD82,CERS6,CHCHD3,CLEC4E,COBL,COPG2,CSMD3,DLST,GHITM,GMDS,HECW2,HNRNPU,IGF2R,INTS1,ISLR2,JAZF1,JPT1,KCNQ3,KLHL29,LEF1,LEMD3,MAPT,mir-128,MKI67,NTN4,PSMD8,PTGER4,PTPRE,PTPRU,PXN,RPA3,RPL7,STX12,TBXAS1,TMCC1,TRAP1,ZNF366	40 (21)	19
TCF7L2		transcription regulator	Akt,CDKN1B,EP300,ERK1/2,EZH2,FOXO1,FOXO3,IRF3,Jnk,JUN,MTOR,NFAT5,NFkB (complex),PPARGC1A,RB1,RELA,SP1,STAT3,STAT5a/b,TCF,TCF7L2,TSC2	3		-0.686	0.0081	0.0123	AP3M2,CDC42EP3,CDK5RAP3,CHCHD3,CLEC4E,COBL,COPG2,DBP,DLST,GHITM,GPR63,HDGFL3,HECW2,HNRNPU,IGF2R,ISLR2,KCNQ3,LAMP1,LEF1,LEMD3,MAPT,MRC2,NOX5,PHF11,PSMC3,PTGER4,PTPRE,PXN,RPA3,RPTOR,SLC12A2,STX12,TMCC1,TMEFF2	34 (22)	21
mir-27		microRNA	APP,AR,CDK1,CEBPA,CEBPB,Creb,CTNNB1,ERK1/2,estrogen receptor,EZH2,GATA1,IKBKB,IKK (complex),JUN,MED1,mir-27,MTOR,NFkB (complex),PRKAA1,RELA,SOX2,SP1,STAT3,STAT5a/b,TP53,TP63	3		-0.885	0.00807	0.0332	ANXA6,AP3M2,ATP5MC1,CAD,CERS6,CLEC4E,COBL,COPG2,CSMD3,DBP,DLST,GPR63,HDGFL3,HECW2,HNRNPU,IER3,IGF2R,ILDR2,INTS1,ISLR2,JAZF1,JPT1,KCNQ3,KLHL29,LEF1,LEMD3,MAPT,mir-128,MYO1D,NOX5,PITRM1,PSMD8,PTGER4,PTPRE,PTPRU,PXN,RAD51C,RPA3,RPL7,S100A13,SEMA5A,STX12,TBXAS1,TMCC1,TRAP1,ZNF366	46 (26)	25
BCR		kinase	APP,BCR,Creb,estrogen receptor,FOXO3,IKBKB,IKK (complex),MAPK1,NCF1,NFE2L2,NFkB (complex),P38 MAPK,PPARG,PRKCD,RELA,SHC1,STAT3,TP53	3		1.265	0.00806	0.015	ANXA6,AP3M2,ATP5MC1,CD82,CERS6,CLEC4E,COBL,COPG2,CSMD3,DBP,DLST,GABRA1,GPR63,HYAL3,IER3,INTS1,LAMP1,LEF1,LEMD3,MAPT,mir-128,MKI67,MYO1D,NMI,NOX5,NRSN1,PHF11,PSMC3,PSMD8,PTGER4,PTPRU,PXN,RAD51C,RCAN3,RPL7,S100A13,TBXAS1,TRAP1,VAMP5,ZEB2	40 (18)	16
TGFB3		growth factor	26s Proteasome,CEBPA,Creb,CREB1,CTNNB1,ERK1/2,ERN1,ESR1,estrogen receptor,IKK (complex),MAPK1,MTOR,NFkB (complex),P38 MAPK,Pka,RELA,RHO,SMAD2,SOX9,STAT3,TGFB3,TP53	3		-0.156	0.00805	0.018	ANXA6,AP3M2,ATP5MC1,CAD,CD82,CDC42EP3,CERS6,CLEC4E,COBL,COPG2,CSMD3,DBP,DLST,FAM186A,GPR63,IER3,INTS1,ISLR2,LAMP1,LEF1,MAPT,mir-128,NMI,NOX5,NTRK1,PDC,PHF11,PSMD8,PTGER4,PTPRE,PTPRU,PXN,RAD51C,RCAN3,RPL7,STX12,TBXAS1,TMCC1,TRAP1,WIF1,ZEB2	41 (22)	20
LGALS3BP		transmembrane receptor	Akt,CDKN1B,Creb,ELAVL1,EP300,EZH2,FOXO1,FOXO3,HMGA1,IRF3,Jnk,JUN,LGALS3BP,MTOR,MYC,NCL,NFAT5,NFkB (complex),PI3K (family),PPARGC1A,RB1,RELA,SP1,SREBF1,STAT3,SYK,TP53,TSC2	3		-0.309	0.00802	0.0219	ANXA6,AP3M2,ATP5MC1,CAD,CDC42EP3,CDK5RAP3,CERS6,CHCHD3,CLEC4E,COBL,COPG2,CSMD3,GHITM,GPR63,HDGFL3,HECW2,IGF2R,INTS1,ISLR2,KCNQ3,KLHL31,LEMD3,MAPT,mir-128,MRC2,PHF11,PSMC3,PSMD8,PTGER4,PTPRN2,PTPRU,PXN,RPA3,RPTOR,RTN2,S100A13,SFXN1,STX12,TMCC1,TMEFF2,TRAP1,UBE4A	42 (28)	26
GLB1		enzyme	Akt,CDKN1B,CEBPA,CEBPB,Creb,EP300,ERK1/2,EZH2,FOXO1,GATA1,GLB1,Hsp27,IKBKB,IRF3,Jnk,JUN,KRAS,MAPK1,MED1,MTOR,NFAT5,NFkB (complex),NOS2,NRAS,PI3K (complex),PPARGC1A,PRKAA1,RB1,RELA,SP1,STAT3,TSC2	3		-1.543	0.00798	0.0222	AP3M2,CAMK1,CDK5RAP3,CHCHD3,CLEC4E,COBL,COPG2,DBP,DLST,GHITM,GPR63,HDGFL3,HECW2,HNRNPU,IGF2R,INTS1,ISLR2,JAZF1,JPT1,KCNQ3,KLHL29,MAPT,MKI67,MRC2,MYO1D,NMI,NPR3,NTRK1,PSMC3,PTGER4,PTPRE,PXN,RCAN3,RPA3,RPTOR,SFXN1,STX12,TBXAS1,TMCC1,TMEFF2,TRIM11,ZNF366	42 (32)	29
CXCL9		cytokine	Akt,CDKN1B,CEBPA,CEBPB,Creb,CXCL9,EP300,ERK1/2,EZH2,FOXO1,GATA1,Hsp27,IKBKB,IRF3,Jnk,JUN,KRAS,MAPK1,MED1,MTOR,NFAT5,NFkB (complex),NOS2,NRAS,PI3K (complex),PPARGC1A,PRKAA1,RB1,RELA,SP1,STAT3,TSC2	3		-1.543	0.00798	0.0222	AP3M2,CAMK1,CDK5RAP3,CHCHD3,CLEC4E,COBL,COPG2,DBP,DLST,GHITM,GPR63,HDGFL3,HECW2,HNRNPU,IGF2R,INTS1,ISLR2,JAZF1,JPT1,KCNQ3,KLHL29,MAPT,MKI67,MRC2,MYO1D,NMI,NPR3,NTRK1,PSMC3,PTGER4,PTPRE,PXN,RCAN3,RPA3,RPTOR,SFXN1,STX12,TBXAS1,TMCC1,TMEFF2,TRIM11,ZNF366	42 (32)	29
EI24		other	AMPK,ATP2A2,CAMKK2,Creb,EI24,ERK1/2,ERN1,FOXO3,GSK3B,Jnk,MAPK1,MED1,MKNK1,PPARG,PRKAA2,RB1,STAT3,TSC2,YAP1	3		-1.347	0.00794	0.0093	CAD,CD82,CDC42EP3,CHCHD3,COBL,COPG2,DLST,GHITM,GPR63,HECW2,IER3,INTS1,KLHL29,LEMD3,MAPT,MKI67,MRC2,NELL2,NMI,NOX5,PHF11,PSMC3,PTPRE,RCAN3,TBXAS1,VAMP5,ZEB2	27 (19)	15
NUMB		other	Akt,AURKA,CDKN1B,EP300,ERK1/2,EZH2,FOXO1,FOXO3,IRF3,Jnk,JUN,MTOR,NFAT5,NFkB (complex),Notch,NUMB,PPARGC1A,RB1,RELA,SP1,STAT3,STAT5a/b,TSC2	3		-0.354	0.00784	0.0128	AP3M2,CDC42EP3,CDK5RAP3,CHCHD3,CLEC4E,COBL,COPG2,DBP,DLST,GHITM,GPR63,HDGFL3,HECW2,HNRNPU,IGF2R,ISLR2,KCNQ3,LEMD3,MAPT,MRC2,NOX5,PHF11,PSMC3,PTGER4,PTPRE,PXN,RPA3,RPTOR,STX12,TMCC1,TMEFF2,ZEB2	32 (23)	20
PROM1		other	Akt,Cdc42,CDKN1B,Creb,EGFR,EIF4E,ELAVL1,EP300,ERN1,EZH2,FOXO1,FOXO3,HMGA1,IGF1R,IKBKB,ITGB1,Jnk,MAPK1,MKNK1,MTOR,MYC,MYD88,NCL,NFAT5,NFkB (complex),PAK2,PI3K (family),PPARGC1A,PRKCD,PROM1,PTEN,PTK2,RB1,RELA,SMAD2,SP1,SRC,SREBF1,STAT3,STAT6,SYK,TP53,TSC2	3		-0.146	0.00782	0.0378	ANXA6,AP3M2,ATP5MC1,CAD,CDK5RAP3,CERS6,CHCHD3,CLEC4E,COBL,COPG2,CSMD3,GHITM,HDGFL3,HECW2,INTS1,ISLR2,KCNQ3,KLHL31,LAMP1,LEMD3,MAPT,mir-128,MKI67,MRC2,MYO1D,NELL2,NTRK1,PSMC3,PSMD8,PTGER4,PTPRN2,PTPRU,PXN,RCAN3,RPA3,RTN2,S100A13,SFXN1,SIDT1,SMAD9,STX12,TMCC1,TMEFF2,TMEM131,TRAP1,UBE4A,ZNF608	47 (43)	38
mir-342		microRNA	Akt,AR,CDKN1B,EP300,EZH2,FOXO1,IRF3,Jnk,JUN,mir-342,MLXIPL,MTOR,NFAT5,NFkB (complex),PPARGC1A,RB1,RELA,SIRT1,SP1,STAT3,STAT5a/b,TSC2	3		-0.164	0.00782	0.0135	AP3M2,CDC42EP3,CDK5RAP3,CERS6,CHCHD3,CLEC4E,COBL,COPG2,DBP,DLST,GHITM,GPR63,HDGFL3,HECW2,HNRNPU,IER3,IGF2R,ILDR2,ISLR2,KCNQ3,LEMD3,LRCH1,MAPT,MRC2,NOX5,PHF11,PITRM1,PSMC3,PTGER4,PTPRN2,PXN,RPA3,RPL7,RPTOR,STX12,TMCC1,TMEFF2	37 (22)	21
PLPP3		phosphatase	Cdc42,CEBPA,Creb,CREB1,CTNNB1,EGFR,estrogen receptor,EZH2,FOXO1,IKBKB,IKK (complex),Jnk,LEF1,MAPK1,MYC,NFkB (complex),PARP1,PLPP3,RELA,SP1,STAT3,STAT6,TCF7L2,TP53	3		-0.302	0.0078	0.0288	ANXA6,AP3M2,ATP5MC1,CAD,CDC42EP3,CDK5RAP3,CERS6,CLEC4E,COBL,COPG2,CSMD3,DBP,DLST,GPR63,HDGFL3,IER3,INTS1,KCNQ3,LAMP1,LEF1,LEMD3,MAPT,mir-128,MKI67,MRC2,MYO1D,NELL2,NMI,NOX5,NTN4,PHF11,POU2F1,PSMD8,PTPRE,PTPRU,PXN,RAD51C,RCAN3,RTN2,TBXAS1,TMEM131,TRAP1,WIF1,ZNF608	44 (24)	23
ARID1A		transcription regulator	Akt,ARID1A,CDKN1B,EP300,ERK1/2,EZH2,FOXO1,FOXO3,IRF3,Jnk,JUN,MTOR,NFAT5,NFkB (complex),PPARGC1A,RB1,RELA,SP1,STAT3,STAT5a/b,TSC2	3		0.354	0.00779	0.0093	AP3M2,CDC42EP3,CDK5RAP3,CHCHD3,CLEC4E,COBL,COPG2,DBP,DLST,GHITM,GPR63,HDGFL3,HECW2,HNRNPU,IGF2R,ISLR2,KCNQ3,LEMD3,MAPT,MRC2,NOX5,PHF11,PSMC3,PTGER4,PTPRE,PXN,RPA3,RPTOR,STX12,TMCC1,TMEFF2,WIF1	32 (21)	20
NTN1		growth factor	CEBPA,CEBPB,Creb,CTNNB1,DCC,ERK1/2,GATA1,IRF3,Jnk,JUN,MED1,MTOR,NTN1,PLC gamma,PPARG,PRKAA1,RHOA,SP1,STAT3,TP53	3		-0.822	0.00773	0.0196	ANXA6,ATP5MC1,CD82,CERS6,COBL,COPG2,CSMD3,DLST,GPR63,HECW2,HNRNPU,IGF2R,INTS1,ISLR2,JAZF1,JPT1,KCNQ3,KLHL29,LEMD3,MAPT,mir-128,MKI67,MRC2,PHF11,PSMD8,PTPRE,PTPRU,RPA3,RPL7,RPTOR,STX12,TBXAS1,TMCC1,TRAP1,VAMP5,WIF1,ZNF366	37 (20)	16
GFRA4		transmembrane receptor	Akt,CDKN1B,EP300,ESR1,EZH2,FOXO1,FOXO3,GFRA4,Hsp27,IKBKB,IRF3,Jnk,JUN,KRAS,MAPK1,MTOR,NFAT5,NFkB (complex),NOS2,NRAS,PI3K (complex),PPARGC1A,RB1,RELA,RET,SP1,STAT3,TSC2	3		-0.973	0.00746	0.0163	AP3M2,CAMK1,CDC42EP3,CDK5RAP3,CHCHD3,CLEC4E,COBL,COPG2,DBP,DLST,FAM186A,GHITM,GPR63,HDGFL3,HECW2,HNRNPU,IGF2R,ISLR2,KCNQ3,LEMD3,MAPT,MKI67,MRC2,MYO1D,NMI,NPR3,NTRK1,PSMC3,PTGER4,PXN,RCAN3,RPA3,RPTOR,SFXN1,STX12,TMCC1,TMEFF2,TRIM11	38 (28)	24
CADM1		other	Akt,CADM1,CDKN1B,EGFR,EP300,ERBB2,ERBB3,EZH2,FOXO1,FOXO3,IRF3,Jnk,JUN,Mapk,MAPK1,MTOR,NFAT5,NFkB (complex),PI3K (family),PPARGC1A,RB1,RELA,RICTOR,SP1,STAT3	3		0.822	0.00746	0.0151	AP3M2,ATP5MC1,CAD,CDC14B,CDC42EP3,CDK5RAP3,CHCHD3,CLEC4E,COBL,COPG2,COX7A2L,DBP,DLST,GHITM,GPR63,HDGFL3,HECW2,HNRNPU,IGF2R,ISLR2,KCNQ3,LAMP1,LEMD3,MAPT,MKI67,MRC2,NMI,PSMD8,PTGER4,PXN,RCAN3,RPA3,RPL7,RPTOR,STX12,TMCC1,TMEFF2	37 (25)	22
HMGCR		enzyme	CEBPA,CEBPB,Creb,CTNNB1,ERK1/2,GATA1,HMGCR,Jnk,JUN,MED1,MTOR,MYC,NFkB (complex),P38 MAPK,PRKAA1,RB1,RELA,SP1,STAT3,TP53,YAP1	3		-0.762	0.00745	0.0174	ANXA6,AP3M2,ATP5MC1,CAD,CD82,CDC42EP3,CERS6,CHCHD3,CLEC4E,COBL,COPG2,CSMD3,GHITM,GPR63,HECW2,HNRNPU,IGF2R,INTS1,ISLR2,JAZF1,JPT1,KCNQ3,KLHL29,LEF1,LEMD3,MAPT,mir-128,MKI67,MRC2,PSMD8,PTGER4,PTPRE,PTPRU,PXN,RPA3,RPL7,RTN2,STX12,TBXAS1,TMCC1,TRAP1,WIF1,ZNF366	43 (21)	20
RAD50		enzyme	Akt,ATM,CDKN1B,Creb,EP300,EZH2,FOXO1,FOXO3,IKBKB,IKK (complex),IRF3,MAPK1,MEF2D,MTOR,NFAT5,NFkB (complex),PPARGC1A,RAD50,RB1,RELA,SP1,STAT3,TP53,TSC2	3		-0.48	0.00696	0.0225	ANXA6,AP3M2,ATP5MC1,BLK,CDK5RAP3,CERS6,CHCHD3,CLEC4E,COBL,COPG2,CSMD3,DBP,DLST,GHITM,HDGFL3,HECW2,INTS1,ISLR2,KCNQ3,LEMD3,MAPT,mir-128,MYO1D,NMI,PHF11,PSMC3,PSMD8,PTGER4,PTPRU,PXN,RAD51C,RCAN3,RPA3,RPL7,RPTOR,STX12,TMCC1,TMEFF2,TRAP1	39 (24)	21
SLC9A5		transporter	Akt,Cdc42,CDKN1B,CEBPA,CEBPB,Creb,EP300,ERK1/2,EZH2,FOXO1,GATA1,IRF3,Jnk,JUN,MED1,MTOR,NFAT5,NFkB (complex),PPARGC1A,PRKAA1,RAC1,RB1,RELA,SLC9A5,SP1,STAT3,STAT5a/b,TP53,TSC2	3		-0.905	0.00695	0.0231	ANXA6,AP3M2,ATP5MC1,CDK5RAP3,CERS6,CHCHD3,CLEC4E,COBL,COPG2,CSMD3,GHITM,GPR63,HDGFL3,HECW2,HNRNPU,IGF2R,INTS1,ISLR2,JAZF1,JPT1,KCNQ3,KLHL29,LAMP1,MAPT,mir-128,MKI67,MRC2,NOX5,PHF11,PSMC3,PSMD8,PTGER4,PTPRE,PTPRU,PXN,RPA3,RPL7,RPTOR,STX12,TBXAS1,TMCC1,TMEFF2,TRAP1,ZNF366	44 (29)	26
EPCAM		other	CCND1,CEBPA,CEBPB,Creb,CTNNB1,EPCAM,ERK1/2,FOXO3,GATA1,MED1,MTOR,NFkB (complex),PRKAA1,RB1,RELA,SP1,STAT3,TP53	3		-0.632	0.00694	0.0187	AHI1,ANXA6,AP3M2,ATP5MC1,CD82,CERS6,CHCHD3,CLEC4E,COBL,COPG2,CSMD3,DLST,GHITM,GPR63,HECW2,INTS1,ISLR2,JAZF1,KCNQ3,KLHL29,LEF1,LEMD3,MAPT,mir-128,MKI67,PSMD8,PTGER4,PTPRE,PTPRU,PXN,RPA3,RPL7,STX12,TBXAS1,TMCC1,TRAP1,WIF1,WWOX,ZEB2,ZNF366	40 (18)	17
Angiotensin II receptor type 1		group	Angiotensin II receptor type 1,Cdc42,Creb,CREB1,CTNNB1,EGFR,EGR1,EIF4E,FOXO1,HTT,IKK (complex),Jnk,JUN,Mapk,MAPK1,MAPK14,MKNK1,NFkB (complex),PARP1,PI3K (family),RELA,SP1,STAT3,STAT6	3		1.715	0.00691	0.0107	AP3M2,CAD,CDC42EP3,CDK5RAP3,CLEC4E,COBL,COPG2,DBP,DLST,HNRNPU,IGF2R,INTS1,KCNQ3,LAMP1,LEMD3,MAPT,MKI67,MRC2,NELL2,NMI,NOX5,PHF11,POU2F1,PTGER4,PTPRE,PXN,RAD51C,RCAN3,SLC12A2,TMEM131,UBE4A,WIF1,ZEB2,ZNF608	34 (24)	23
CTTN		other	Akt,CDKN1B,CTTN,EP300,ERK1/2,EZH2,FOXO1,FOXO3,IRF3,Jnk,JUN,MTOR,NFAT5,NFkB (complex),PPARGC1A,RB1,RELA,RHOG,SP1,STAT3,STAT5a/b,SYK,TSC2	3		-0.707	0.0069	0.009	AP3M2,CDC42EP3,CDK5RAP3,CHCHD3,CLEC4E,COBL,COPG2,DBP,DLST,GHITM,GPR63,HDGFL3,HECW2,HNRNPU,IGF2R,ISLR2,KCNQ3,KLHL31,LEMD3,MAPT,MRC2,NOX5,PHF11,PSMC3,PTGER4,PTPRE,PXN,RPA3,RPTOR,STX12,TMCC1,TMEFF2	32 (23)	20
ITLN1		other	AMPK,CEBPA,CEBPB,Creb,CTNNB1,ERK1/2,ERN1,FOXO3,GATA1,ITLN1,Jnk,JUN,MAPK1,MKNK1,MTOR,NFkB (complex),RB1,RELA,SP1,STAT3	3		-1.183	0.00689	0.0124	AP3M2,CAD,CHCHD3,CLEC4E,COBL,COPG2,DBP,DLST,GHITM,GPR63,HNRNPU,IGF2R,INTS1,ISLR2,JAZF1,JPT1,KCNQ3,LEF1,LEMD3,MKI67,MRC2,NELL2,NMI,NOX5,PHF11,PTGER4,PTPRE,PXN,RCAN3,RPA3,STX12,TBXAS1,TMCC1,WIF1,ZNF366	35 (20)	18
GRP		growth factor	Cdc42,CEBPA,CEBPB,Creb,CREB1,CTNNB1,EGFR,ERK1/2,FOXO1,GATA1,GRP,Jnk,JUN,Mapk,MAPK1,MAPK14,MED1,MTOR,NFkB (complex),PARP1,PI3K (family),PRKAA1,RELA,SP1,STAT3,STAT6	3		0	0.00689	0.0115	AP3M2,CAD,CDK5RAP3,CLEC4E,COBL,COPG2,DBP,HECW2,HNRNPU,IGF2R,INTS1,ISLR2,JAZF1,JPT1,KCNQ3,KLHL29,LAMP1,MAPT,MKI67,MRC2,NELL2,NMI,NOX5,PHF11,POU2F1,PTGER4,PTPRE,PXN,RCAN3,RPA3,STX12,TBXAS1,TMCC1,TMEM131,WIF1,ZEB2,ZNF366,ZNF608	38 (26)	25
PREX1		other	Akt,CDKN1B,EIF4E,EP300,EZH2,FOXO1,FOXO3,IKBKB,IRF3,Jnk,JUN,MAP2K1/2,MAPK1,MKNK1,MTOR,MYC,NFAT5,NFkB (complex),PPARGC1A,PREX1,PRKAA1,Rac,RAC1,RARA,RB1,RELA,SP1,STAT3,TP53,TSC2	3		-0.302	0.00688	0.0287	ANXA6,AP3M2,ATP5MC1,CAD,CDC42EP3,CDK5RAP3,CERS6,CHCHD3,CLEC4E,COBL,COPG2,CSMD3,FAM186A,GHITM,GPR63,HDGFL3,HECW2,IGF2R,ISLR2,KCNQ3,KLHL29,LEMD3,MAPT,mir-128,MKI67,MRC2,MYO1D,NELL2,NMI,NTRK1,PSMC3,PSMD8,PTGER4,PTPRU,PXN,RCAN3,RPA3,RPTOR,RTN2,STX12,TMCC1,TMEFF2,TRAP1,UBE4A	44 (30)	25
IKKA/B		group	IKKA/B,IRF3,JUN,OPTN,RELA,STAT5a/b,TBK1,TP53	3		0.392	0.00686	0.0097	ANXA6,AP3M2,ATP5MC1,CD82,CDC42EP3,CERS6,CSMD3,DLST,GPR63,HNRNPU,IGF2R,LEF1,mir-128,MKI67,NMI,NOX5,PHF11,PSMD8,PTGER4,PTPRE,PTPRU,PXN,RPL7,RPTOR,TRAP1,ZEB2	26 (8)	6
DNA-PK		complex	Akt,ATM,CDKN1B,CHEK1,Creb,DNA-PK,E2F3,EGFR,EP300,EZH2,FOXO1,FOXO3,H2AX,HSP90AA1,IKBKB,IKK (complex),IRF3,MEF2D,MTOR,MYC,NFAT5,NFkB (complex),PARP1,PPARGC1A,RB1,RELA,SP1,STAT3,TP53,TSC2,VCP	3		-0.781	0.00683	0.028	ANXA6,AP3M2,ATP5MC1,BLK,CAD,CDK5RAP3,CERS6,CHCHD3,CLEC4E,COBL,COPG2,CSMD3,DBP,DLST,GHITM,HDGFL3,HECW2,INTS1,ISLR2,KCNQ3,LEMD3,MAPT,mir-128,MYO1D,NEAT1,NELL2,POU2F1,PSMC3,PSMD8,PTGER4,PTPRU,PXN,RAD51C,RPA3,RPL7,RPTOR,RTN2,STX12,TMCC1,TMEFF2,TRAP1	41 (31)	24
GRB10		other	Akt,CCND1,CDKN1B,Creb,EGFR,EIF4E,EP300,ERBB2,ESR1,EZH2,FOXO1,FOXO3,GRB10,IGF1R,INSR,IRF3,IRS1,IRS2,Jnk,Mapk,MAPK1,MKNK1,MTOR,MYC,NFAT5,NFkB (complex),PI3K (family),PPARGC1A,PRKAA1,RB1,RELA,RXRA,SP1,TP53,TSC2	3		0.438	0.00682	0.0372	AHI1,ANXA6,AP3M2,CAD,CDC14B,CDK5RAP3,CERS6,CHCHD3,CLEC4E,CSMD3,DBP,DLST,FAM186A,GHITM,HDGFL3,HECW2,IGF2R,INTS1,ISLR2,JPT1,KCNQ3,KLHL29,LAMP1,LEMD3,MAPT,mir-128,MRC2,NELL2,NMI,NTRK1,PHF11,PSMC3,PSMD8,PTGER4,PTPRU,PXN,RCAN3,RPA3,RPL7,RPTOR,RTN2,STX12,TMCC1,TMEFF2,TRAP1,UBE4A,WWOX	47 (35)	31
FUZ		other	APP,AR,FOXO1,FUZ,IKBKB,Jnk,JUN,MAP3K1,MAPK14,MTOR,NFAT5,NFE2L2,NFkB (complex),PLA2G4A,RAC1,RELA,RICTOR,SP1,STAT3,STAT6	3		0	0.00662	0.0129	AP3M2,CDK5RAP3,CLEC4E,COBL,COPG2,COX7A2L,GABRA1,HECW2,HNRNPU,ILDR2,ISLR2,KCNQ3,LEMD3,MAPT,MRC2,MYO1D,NOX5,NRSN1,PHF11,PITRM1,PSMC3,PTGER4,PXN,S100A13,SLC12A2,STX12,TMCC1,TMEM131,WIF1,ZNF608	30 (20)	17
LIPE		enzyme	AKT1,CEBPA,CEBPB,CEL,Creb,CTNNB1,DGAT1,ERK1/2,ESR1,FASN,FOXO1,GATA1,GPAM,Hsp27,IKBKB,IRF3,KRAS,LIPE,MED1,MTOR,NFkB (complex),NOS2,NRAS,PARP1,PI3K (complex),PRKAA1,RB1,RELA,SP1,SRC (family),STAT3,STAT6,TLR3,TP53,TSC2	3		0.447	0.00662	0.037	ANXA6,AP3M2,ATP5MC1,CAMK1,CDK5RAP3,CERS6,CHCHD3,COBL,COPG2,CSMD3,FAM186A,GHITM,GLRX3,GPR63,HECW2,INTS1,ISLR2,JAZF1,JPT1,KCNQ3,KLHL29,mir-128,MYO1D,NELL2,NPR3,NTRK1,POU2F1,PSMC3,PSMD8,PTGER4,PTPRE,PTPRU,PXN,RPA3,RPL7,RPTOR,SFXN1,TBXAS1,TMCC1,TMEM131,TRAP1,TRIM11,WIF1,ZNF366,ZNF608	45 (35)	27
MMP11		peptidase	Akt,AR,CDKN1B,EP300,ERN1,EZH2,FOXO1,HSF1,IRF3,Jnk,JUN,MLXIPL,MMP11,MTOR,NFAT5,NFkB (complex),PPARGC1A,PRKAA,RB1,RELA,SIRT1,SP1,STAT3,STAT5a/b,TP53,TSC2	3		0.302	0.00659	0.023	ANXA6,AP3M2,ATP5MC1,CAD,CDC42EP3,CDK5RAP3,CERS6,CHCHD3,CLEC4E,COBL,COPG2,CSMD3,DBP,DLST,GHITM,HDGFL3,HECW2,HNRNPU,IER3,IGF2R,ILDR2,ISLR2,KCNQ3,LEMD3,LRCH1,MAPT,mir-128,MKI67,MRC2,NOX5,PHF11,PITRM1,PSMC3,PSMD8,PTGER4,PTPRU,PXN,RPA3,RPL7,RPTOR,STX12,TMCC1,TMEFF2,TRAP1	44 (26)	23
MVP		other	CEBPA,CEBPB,Creb,CXCR4,EIF4E,ELAVL1,ERK1/2,GATA1,HMGA1,IRF3,JUN,MED1,Mek,MTOR,MVP,NCL,NFkB (complex),PPARG,PRKAA1,RB1,RELA,SP1,STAT3,TCF7L2	3		0.333	0.00657	0.0146	ANKS1B,AP3M2,CHCHD3,CLEC4E,COBL,COPG2,DLST,GHITM,GPR63,HECW2,HNRNPU,IGF2R,INTS1,ISLR2,JAZF1,JPT1,KCNQ3,KLHL29,LAMP1,LEMD3,MAPT,MKI67,PHF11,PTGER4,PTPRE,PTPRN2,PXN,RPA3,RPTOR,SFXN1,STX12,TBXAS1,TMCC1,UBE4A,VAMP5,ZNF366	36 (24)	22
AKAP1		other	26s Proteasome,AKAP1,Akt,CDKN1B,Creb,EP300,ERN1,ESR1,EZH2,FOXO1,FOXO3,IKBKB,IRF3,Jnk,JUN,MTOR,NFAT5,NFkB (complex),Pka,PPARGC1A,RB1,RELA,RHO,SP1,STAT3,TSC2	3		-1.183	0.00652	0.0169	AP3M2,CAD,CDC42EP3,CDK5RAP3,CHCHD3,CLEC4E,COBL,COPG2,DBP,DLST,FAM186A,GHITM,GPR63,HDGFL3,HECW2,HNRNPU,IGF2R,INTS1,ISLR2,KCNQ3,LAMP1,LEMD3,MAPT,MRC2,MYO1D,NTRK1,PDC,PSMC3,PTGER4,PXN,RPA3,RPTOR,STX12,TMCC1,TMEFF2	35 (26)	23
TRPC1		ion channel	Akt,CDKN1B,CEBPA,CEBPB,Creb,EGFR,EIF4E,EP300,ERK1/2,ESR1,EZH2,GATA1,HSF1,IKK (complex),IRF3,Jnk,JUN,MAPK1,MED1,MMP9,MTOR,NFAT5,NFE2L2,NFkB (complex),PARP1,PI3K (family),PPARGC1A,PRKAA,PRKAA1,PRKCD,RELA,SP1,STAT3,STAT6,TGFB1,TP53,TRPC1,TSC2	3		-0.566	0.00645	0.0344	ANXA6,AP3M2,ATP5MC1,CAD,CERS6,CLEC4E,COBL,COPG2,CSMD3,FAM186A,GABRA1,HDGFL3,HECW2,HNRNPU,IGF2R,INTS1,ISLR2,JAZF1,JPT1,KCNQ3,KLHL29,LAMP1,MAPT,mir-128,MRC2,NELL2,NRSN1,NTRK1,POU2F1,PSMC3,PSMD8,PTGER4,PTPRE,PXN,RAD51C,RCAN3,RPA3,RPL7,RPTOR,S100A13,STX12,TBXAS1,TMCC1,TMEFF2,TMEM131,TRAP1,UBE4A,ZEB2,ZNF366,ZNF608	50 (38)	34
SLC36A4		transporter	Creb,EIF3A,EIF4EBP1,FMR1,GSK3B,MTOR,MTORC1,RELA,RICTOR,RPS6KB1,SLC36A4,SREBF1,STAT3	3		-1.964	0.00644	0.0063	AP3M2,ATP5MC1,CD82,COBL,COPG2,COX7A2L,INTS1,ISLR2,LEF1,MAPT,mir-128,PHF11,PSMC3,PSMD8,PTGER4,RPA3,RPL7,S100A13,SLC12A2,STX12,TMCC1	21 (13)	9
SLC36A1		transporter	Creb,EIF3A,EIF4EBP1,FMR1,GSK3B,MTOR,MTORC1,RELA,RICTOR,RPS6KB1,SLC36A1,SREBF1,STAT3	3		-1.964	0.00644	0.0063	AP3M2,ATP5MC1,CD82,COBL,COPG2,COX7A2L,INTS1,ISLR2,LEF1,MAPT,mir-128,PHF11,PSMC3,PSMD8,PTGER4,RPA3,RPL7,S100A13,SLC12A2,STX12,TMCC1	21 (13)	9
STK40		kinase	CEBPA,CEBPB,Creb,CTNNB1,ERK1/2,estrogen receptor,GATA1,IKBKB,IKK (complex),JUN,MED1,MTOR,NFkB (complex),PRKAA1,RELA,SP1,STAT3,STK40,TP53	3		-0.156	0.00642	0.0137	ANXA6,AP3M2,ATP5MC1,CD82,CERS6,CLEC4E,COBL,COPG2,CSMD3,DBP,DLST,GPR63,HECW2,HNRNPU,IER3,IGF2R,INTS1,ISLR2,JAZF1,JPT1,KCNQ3,KLHL29,LEF1,LEMD3,MAPT,mir-128,MYO1D,PSMD8,PTGER4,PTPRE,PTPRU,PXN,RAD51C,RPA3,RPL7,STX12,TBXAS1,TMCC1,TRAP1,WIF1,ZNF366	41 (19)	19
FLNB		other	APP,AR,FLNB,FOXO1,IKBKB,Jnk,JUN,MAP2K4,MAP3K1,MAPK14,MTOR,MYC,NFAT5,NFE2L2,NFkB (complex),PLA2G4A,RAC1,RELA,RICTOR,SP1,STAT3,STAT6	3		0	0.00638	0.0137	AP3M2,CAD,CDK5RAP3,CLEC4E,COBL,COPG2,COX7A2L,GABRA1,HECW2,HNRNPU,ILDR2,ISLR2,KCNQ3,LEMD3,MAPT,MRC2,MYO1D,NOX5,NRSN1,PHF11,PITRM1,PSMC3,PTGER4,PXN,RTN2,S100A13,SLC12A2,STX12,TMCC1,TMEM131,WIF1,ZNF608	32 (22)	18
TNFRSF10B		transmembrane receptor	APP,AR,BAX,CASP8,CASP9,FOXO1,IKBKB,Jnk,JUN,MTOR,NFE2L2,NFkB (complex),PLA2G4A,RICTOR,Smad2/3,SP1,STAT6,TBK1,TCF,TNFRSF10B,TP53,YAP1	3		0.16	0.00635	0.0179	ANXA6,ATP5MC1,CDC42EP3,CDK5RAP3,CERS6,CLEC4E,COX7A2L,CSMD3,DBP,DLST,GABRA1,GPR63,HNRNPU,ILDR2,ISLR2,KCNQ3,LEF1,LEMD3,MAPT,mir-128,MKI67,MRC2,MYO1D,NMI,NOX5,NRSN1,PITRM1,PSMC3,PSMD8,PTPRU,PXN,S100A13,SLC12A2,STX12,TMCC1,TMEM131,TRAP1,ZEB2,ZNF608	39 (22)	18
MAP3K6		kinase	APP,AR,CEBPA,CEBPB,Creb,CREB1,EGFR,EIF4E,EP300,FOXO1,Hsp27,IKBKB,Jnk,JUN,KAT5,MAP3K5,MAP3K6,MET,MITF,MKNK1,MTOR,NCF1,NFAT5,NFE2L2,NFkB (complex),P38 MAPK,PLA2G4A,PPARG,PPARGC1A,RB1,RELA,RICTOR,Smad2/3,SP1,STAT6,TCF,TP53	3		-1.286	0.00634	0.0319	ANXA6,AP3M2,ATP5MC1,CAD,CD82,CDK5RAP3,CERS6,CHCHD3,CLEC4E,COX7A2L,CSMD3,DBP,DLST,GABRA1,GHITM,HECW2,HNRNPU,HYAL3,IER3,ILDR2,INTS1,ISLR2,JPT1,KCNQ3,LEF1,LEMD3,MAPT,mir-128,MRC2,MYO1D,NELL2,NOX5,NRSN1,NTRK1,PHF11,PITRM1,PSMC3,PSMD8,PTGER4,RPA3,S100A13,STX12,TBXAS1,TMCC1,TMEM131,TRAP1,UBE4A,VAMP5,ZNF608	49 (37)	35
CSPG4		other	CEBPA,CEBPB,Creb,CSPG4,CTNNB1,ERK1/2,Focal adhesion kinase,GATA1,JUN,MED1,MTOR,NANOG,NFkB (complex),P38 MAPK,PRKAA1,RELA,RHOA,SP1,STAT3,TP53	3		0.16	0.00624	0.0147	ANXA6,AP3M2,ATP5MC1,CD82,CERS6,CLEC4E,COBL,COPG2,CSMD3,DLST,FUS,GPR63,HECW2,HNRNPU,IGF2R,INTS1,ISLR2,JAZF1,JPT1,KCNQ3,KLHL29,LEF1,LEMD3,MAPT,mir-128,MKI67,PSMD8,PTGER4,PTPRE,PTPRU,PXN,RPA3,RPL7,STX12,TBXAS1,TMCC1,TRAP1,WIF1,ZNF366	39 (20)	17
MAP3K10		kinase	APP,AR,CEBPA,CEBPB,Creb,CREB1,EGFR,EIF4E,EP300,FOXO1,GATA1,Hsp27,IKBKB,Jnk,JUN,KAT5,MAP3K10,MITF,MKNK1,MTOR,NFAT5,NFE2,NFE2L2,NFkB (complex),P38 MAPK,PLA2G4A,PPARG,PPARGC1A,RB1,RELA,RICTOR,Smad2/3,SP1,STAT6,TCF3,TP53	3		-1.26	0.00623	0.0332	ANXA6,AP3M2,ATP5MC1,CAD,CD82,CDK5RAP3,CERS6,CHCHD3,CLEC4E,COX7A2L,CSMD3,DBP,DLST,GABRA1,GHITM,HECW2,HNRNPU,IER3,IGF2R,ILDR2,INTS1,ISLR2,JAZF1,JPT1,KCNQ3,LEF1,LEMD3,MAPT,mir-128,MRC2,MYO1D,NELL2,NOX5,NRSN1,NTRK1,PHF11,PITRM1,PSMC3,PSMD8,PTGER4,RPA3,S100A13,STX12,TBXAS1,TMCC1,TMEM131,TRAP1,UBE4A,VAMP5,ZNF366,ZNF608	51 (36)	35
F2RL3		G-protein coupled receptor	AHR,Akt,CDKN1B,CEBPA,CEBPB,Creb,EP300,ERK1/2,EZH2,F2RL3,FOXO1,GATA1,GPIIB-IIIA,IRF3,ITGB3,LCP2,MAPK1,MTOR,NFkB (complex),PPARGC1A,PRKAA1,PTPN6,RB1,RELA,SP1,STAT6,SYK,TP53,TSC2	3		-1.093	0.00621	0.0264	ANXA6,AP3M2,CDK5RAP3,CERS6,CHCHD3,CLEC4E,CSMD3,DBP,DLST,GHITM,HDGFL3,INTS1,ISLR2,JAZF1,JPT1,KCNQ3,KLHL29,KLHL31,LAMP1,MAPT,mir-128,NMI,PHF11,PSMC3,PSMD8,PTGER4,PTPRE,PTPRU,PXN,RCAN3,RPA3,RPL7,RPTOR,STX12,TBXAS1,TMCC1,TMEFF2,TMEM131,TRAP1,ZNF366,ZNF608	41 (29)	24
S100A9		other	CASP9,CDK1,CEBPA,CEBPB,Creb,CREB1,CTNNB1,EGFR,EIF4E,ERK1/2,EZH2,FOXO1,GATA1,Hsp27,IKBKB,Jnk,JUN,MED1,MET,MITF,MKNK1,MTOR,NFAT5,NFE2L2,NFkB (complex),P38 MAPK,PLA2G4A,PPARG,PPARGC1A,PRKAA1,RB1,RELA,RICTOR,S100A9,SOX2,SP1,STAT3,STAT6,TCF,TERT	3		-0.905	0.00618	0.028	AP3M2,CAD,CD82,CDK5RAP3,CHCHD3,CLEC4E,COBL,COPG2,COX7A2L,GABRA1,GHITM,HDGFL3,HECW2,HNRNPU,IER3,INTS1,ISLR2,JAZF1,JPT1,KCNQ3,KLHL29,LEF1,LEMD3,MRC2,MYO1D,NELL2,NOX5,NRSN1,NTRK1,PHF11,PSMC3,PTGER4,PTPRE,RPA3,SEMA5A,STX12,TBXAS1,TMCC1,TMEM131,UBE4A,VAMP5,WIF1,ZNF366,ZNF608	44 (40)	36
ARHGEF25		other	APP,AR,ARHGEF25,Cdc42,CDKN1B,CEBPA,CEBPB,Creb,CREB1,CTNNB1,EGFR,EIF4E,EP300,ERK1/2,ESR1,FOXO1,GATA1,Hsp27,IKBKB,Jnk,KAT5,MAPK14,MED1,MITF,MKNK1,MTOR,MYC,NFAT5,NFE2L2,NFkB (complex),P38 MAPK,PAK1,PLA2G4A,PPARG,PPARGC1A,PRKAA1,RAC1,RB1,RELA,RICTOR,ROCK,SP1,STAT3,STAT6	3		-1.896	0.00615	0.0367	AP3M2,CAD,CD82,CDK5RAP3,CHCHD3,CLEC4E,COBL,COPG2,COX7A2L,FAM186A,GABRA1,GHITM,HECW2,IER3,ILDR2,INTS1,ISLR2,JAZF1,JPT1,KCNQ3,KLHL29,LAMP1,LEMD3,MAPT,MRC2,MYO1D,NELL2,NOX5,NRSN1,NTRK1,PHF11,PITRM1,PSMC3,PTPRE,RPA3,RTN2,S100A13,STX12,TBXAS1,TMCC1,TMEFF2,TMEM131,UBE4A,VAMP5,WIF1,ZNF366,ZNF608	47 (44)	40
CARD6		other	CARD6,CDKN1B,CEBPB,Creb,CTNNB1,EGFR,EIF4E,ERBB2,ERK1/2,GATA1,IKK (complex),JINK1/2,JUN,MAP2K1,MAP2K1/2,MAPK1,MED1,MTOR,NFkB (complex),PARP1,PRKAA1,RARA,SP1,STAT3,STK11,TP53	3		1.64	0.00615	0.0288	ANXA6,ATP5MC1,CAD,CD82,CDC14B,CERS6,CLEC4E,COBL,COPG2,CSMD3,DBP,FAM186A,GPR63,HECW2,HNRNPU,IER3,IGF2R,INTS1,ISLR2,JAZF1,JPT1,KCNQ3,KLHL29,LAMP1,mir-128,MKI67,NOX5,NTRK1,PHF11,POU2F1,PSMD8,PTPRE,PTPRU,PXN,RAD51C,RCAN3,RPA3,RPL7,STX12,TMCC1,TMEFF2,TRAP1,UBE4A,WIF1,ZNF366	45 (26)	23
HTATIP2		transcription regulator	Akt,Cdc42,CDKN1B,CEBPA,CEBPB,Creb,CREB1,EGFR,EP300,ERK1/2,EZH2,FOXO1,GATA1,HTATIP2,IRF3,Jnk,JUN,Mapk,MAPK1,MED1,MTOR,NFAT5,NFkB (complex),PARP1,PI3K (family),PPARGC1A,PRKAA1,RB1,RELA,SP1,STAT3,STAT6,TSC2	3		1.067	0.00613	0.0183	AP3M2,CAD,CDK5RAP3,CHCHD3,CLEC4E,COBL,COPG2,DBP,DLST,GHITM,GPR63,HDGFL3,HECW2,HNRNPU,IGF2R,INTS1,ISLR2,JAZF1,JPT1,KCNQ3,KLHL29,LAMP1,MAPT,MKI67,MRC2,NELL2,NMI,POU2F1,PSMC3,PTGER4,PTPRE,PXN,RCAN3,RPA3,RPTOR,STX12,TBXAS1,TMCC1,TMEFF2,TMEM131,ZEB2,ZNF366,ZNF608	43 (33)	31
FCHSD2		other	Akt,Cdc42,CDKN1B,CEBPA,CEBPB,Creb,CREB1,EGFR,EP300,ERK1/2,EZH2,FCHSD2,FOXO1,GATA1,IRF3,Jnk,JUN,Mapk,MAPK1,MED1,MTOR,NFAT5,NFkB (complex),PARP1,PI3K (family),PPARGC1A,PRKAA1,RB1,RELA,SP1,STAT3,STAT6,TSC2	3		1.067	0.0061	0.0183	AP3M2,CAD,CDK5RAP3,CHCHD3,CLEC4E,COBL,COPG2,DBP,DLST,GHITM,GPR63,HDGFL3,HECW2,HNRNPU,IGF2R,INTS1,ISLR2,JAZF1,JPT1,KCNQ3,KLHL29,LAMP1,MAPT,MKI67,MRC2,NELL2,NMI,POU2F1,PSMC3,PTGER4,PTPRE,PXN,RCAN3,RPA3,RPTOR,STX12,TBXAS1,TMCC1,TMEFF2,TMEM131,ZEB2,ZNF366,ZNF608	43 (33)	31
FGF8		growth factor	CCND1,CEBPA,CEBPB,Creb,CREB1,CTNNB1,EGFR,EIF4E,EP300,ERK1/2,FGF8,FGFR1,GATA1,Hsp27,IKBKB,Jnk,JUN,KAT5,Mapk,MED1,MET,MITF,MKNK1,MTOR,NFAT5,NFkB (complex),P38 MAPK,PLA2G4A,PPARG,PPARGC1A,PRKAA1,RB1,RELA,RXRA,SP1,STAT3,STAT5a/b,TP53	3		-1.286	0.00608	0.0256	AHI1,ANXA6,AP3M2,ATP5MC1,CAD,CD82,CERS6,CHCHD3,CLEC4E,COBL,COPG2,CSMD3,DBP,DLST,GHITM,HECW2,HNRNPU,IER3,IGF2R,INTS1,ISLR2,JAZF1,JPT1,KCNQ3,KLHL29,LEF1,LEMD3,MAPT,mir-128,MKI67,MRC2,MYO1D,NELL2,NOX5,NTRK1,PSMD8,PTGER4,PTPRE,RPA3,RPL7,STX12,TBXAS1,TMCC1,TRAP1,UBE4A,VAMP5,WIF1,WWOX,ZNF366	49 (38)	37
PACSIN2		transporter	Akt,Cdc42,CDKN1B,CEBPA,CEBPB,Creb,CREB1,EGFR,EP300,ERK1/2,EZH2,FOXO1,GATA1,IRF3,Jnk,JUN,Mapk,MAPK1,MED1,MTOR,NFAT5,NFkB (complex),PACSIN2,PARP1,PI3K (family),PPARGC1A,PRKAA1,RB1,RELA,SP1,STAT3,STAT6,TSC2	3		1.067	0.00607	0.0181	AP3M2,CAD,CDK5RAP3,CHCHD3,CLEC4E,COBL,COPG2,DBP,DLST,GHITM,GPR63,HDGFL3,HECW2,HNRNPU,IGF2R,INTS1,ISLR2,JAZF1,JPT1,KCNQ3,KLHL29,LAMP1,MAPT,MKI67,MRC2,NELL2,NMI,POU2F1,PSMC3,PTGER4,PTPRE,PXN,RCAN3,RPA3,RPTOR,STX12,TBXAS1,TMCC1,TMEFF2,TMEM131,ZEB2,ZNF366,ZNF608	43 (33)	31
YOD1		enzyme	CEBPA,estrogen receptor,IFNB1,IKBKB,IKK (complex),IRF3,JUN,MAVS,NFkB (complex),RELA,STAT5a/b,TP53,YOD1	3		-1.029	0.00602	0.006	ANXA6,AP3M2,ATP5MC1,CD82,CDC42EP3,CERS6,CLEC4E,CSMD3,DBP,DLST,GPR63,HNRNPU,IER3,IGF2R,LEF1,MAPT,mir-128,MKI67,MYO1D,NMI,NOX5,PHF11,PSMD8,PTGER4,PTPRE,PTPRU,PXN,RAD51C,RPL7,RPTOR,SIDT1,TBXAS1,TRAP1,ZEB2	34 (13)	11
PRKACB		kinase	26s Proteasome,ADRB2,CTNNB1,ERK1/2,ERN1,ESR1,IKBKB,JUN,MAPK1,NFkB (complex),NR3C1,P38 MAPK,Pka,PRKACB,RELA,RHO,SLC9A1,TNF,TP53	3		0	0.00599	0.014	ANXA6,AP3M2,ARHGEF10L,ATP5MC1,CAD,CD82,CERS6,CLEC4E,COBL,CSMD3,DBP,DLST,FAM186A,GABRA1,GPR63,HNRNPU,IER3,IGF2R,LAMP1,LEF1,MAP2K4,mir-128,MYO1D,NMI,NTRK1,PDC,PHF11,PLPP1,POU2F1,PSMD8,PTGER4,PTPRE,PTPRU,PXN,RCAN3,RPL7,SLC12A2,TRAP1,WIF1,ZEB2	40 (19)	16
PP1/PP2A		group	Creb,estrogen receptor,EZH2,JAK3,NFkB (complex),PP1/PP2A,RELA,STAT3,STAT5A,STAT5a/b,STAT5B,STAT6,TP53	3		0.686	0.00598	0.0086	ANKS1B,ANXA6,AP3M2,ATP5MC1,CDC42EP3,CERS6,CLEC4E,COBL,COPG2,CSMD3,DBP,DIP2B,DLST,GPR63,HDGFL3,IER3,IGF2R,INTS1,KLHL31,LEF1,MAPT,mir-128,MKI67,NOX5,PSMD8,PTGER4,PTPRU,PXN,RPL7,TMEM131,TRAP1,WIF1,ZEB2,ZNF608	34 (13)	11
TACSTD2		other	CEBPA,CEBPB,Creb,CTNNB1,ERK1/2,GATA1,Jnk,JUN,MED1,MTOR,NFkB (complex),PAK4,PRKAA1,RELA,SP1,STAT3,TACSTD2,TP53	3		-0.48	0.00596	0.0127	ANXA6,AP3M2,ATP5MC1,CD82,CERS6,CLEC4E,COBL,COPG2,CSMD3,DBP,DLST,GPR63,HECW2,HNRNPU,IGF2R,INTS1,ISLR2,JAZF1,JPT1,KCNQ3,KLHL29,LEF1,LEMD3,MAPT,mir-128,MRC2,PSMD8,PTGER4,PTPRE,PTPRU,PXN,RPA3,RPL7,STX12,TBXAS1,TMCC1,TRAP1,WIF1,ZNF366	39 (18)	16
ARHGEF4		other	APP,AR,ARHGEF4,FOXO1,IKBKB,Jnk,JUN,MTOR,NFAT5,NFE2L2,NFkB (complex),PLA2G4A,RAC1,RELA,RICTOR,SP1,STAT3,STAT6,TCF	3		0	0.00594	0.0112	AP3M2,CDK5RAP3,CLEC4E,COBL,COPG2,COX7A2L,GABRA1,HECW2,HNRNPU,ILDR2,ISLR2,KCNQ3,LEF1,LEMD3,MAPT,MRC2,MYO1D,NOX5,NRSN1,PHF11,PITRM1,PSMC3,PTGER4,PXN,S100A13,SLC12A2,STX12,TMCC1,TMEM131,ZNF608	30 (19)	17
FCER2		transmembrane receptor	CEBPA,CHUK,Creb,estrogen receptor,FCER2,FOXO1,GSK3B,IKBKB,IKK (complex),Jnk,JUN,MAPK1,MTOR,NFkB (complex),NFKB1,NOS2,RELA,TLR3,TP53	3		-0.16	0.00592	0.0093	ANXA6,AP3M2,ATP5MC1,CD82,CDK5RAP3,CERS6,CLEC4E,CSMD3,DBP,DLST,GLRX3,GPR63,HNRNPU,IER3,IGF2R,INTS1,ISLR2,LEF1,MAPT,mir-128,MRC2,MYO1D,NMI,PHF11,PSMD8,PTGER4,PTPRE,PTPRU,PXN,RAD51C,RCAN3,RPL7,SFXN1,SLC12A2,STX12,TBXAS1,TMCC1,TRAP1,ZEB2	39 (19)	16
CYP27B1		enzyme	Akt,CDKN1B,CYP27B1,EP300,ERK1/2,EZH2,FOXO1,FOXO3,IRF3,Jnk,JUN,MTOR,NFAT5,NFkB (complex),PPARGC1A,RB1,RELA,SP1,STAT3,STAT5a/b,TSC2	3		0.707	0.0059	0.0073	AP3M2,CDC42EP3,CDK5RAP3,CHCHD3,CLEC4E,COBL,COPG2,DBP,DLST,GHITM,GPR63,HDGFL3,HECW2,HNRNPU,IGF2R,ISLR2,KCNQ3,LEMD3,MAPT,MKI67,MRC2,NOX5,PHF11,PSMC3,PTGER4,PTPRE,PXN,RPA3,RPTOR,STX12,TMCC1,TMEFF2	32 (21)	20
BAK1		other	APP,AR,BAK1,CASP9,FOXO1,IKBKB,IRF3,ITPR1,Jnk,JUN,MAP3K5,MTOR,NCF1,NFATC2,NFE2L2,NFkB (complex),OGT,RELA,RICTOR,Smad2/3,SP1,SREBF1,STAT3,STAT6,TCF,TICAM1,TP53,TRAF2,YAP1	3		0.302	0.00582	0.0179	ANXA6,AP3M2,ATP5MC1,CDC42EP3,CDK5RAP3,CERS6,CLEC4E,COBL,COPG2,COX7A2L,CSMD3,DBP,DLST,GABRA1,GPR63,HNRNPU,HYAL3,ILDR2,ISLR2,KCNQ3,LEF1,LEMD3,MAPT,mir-128,MKI67,MRC2,MYO1D,NMI,NRSN1,PHF11,PITRM1,PSMC3,PSMD8,PTPRU,RPTOR,S100A13,SLC12A2,STX12,TMCC1,TMEM131,TRAP1,WIF1,ZEB2,ZNF608	44 (29)	24
STAB2		transmembrane receptor	CEBPA,CEBPB,Creb,CTNNB1,ERK1/2,estrogen receptor,GATA1,IKBKB,IKK (complex),JUN,MED1,MTOR,NFkB (complex),PRKAA1,RELA,SP1,STAB2,STAT3,TP53	3		-0.156	0.00577	0.0127	ANXA6,AP3M2,ATP5MC1,CD82,CERS6,CLEC4E,COBL,COPG2,CSMD3,DBP,DLST,GPR63,HECW2,HNRNPU,IER3,IGF2R,INTS1,ISLR2,JAZF1,JPT1,KCNQ3,KLHL29,LEF1,LEMD3,MAPT,mir-128,MYO1D,PSMD8,PTGER4,PTPRE,PTPRU,PXN,RAD51C,RPA3,RPL7,STX12,TBXAS1,TMCC1,TRAP1,WIF1,ZNF366	41 (19)	18
miR-204-5p (and other miRNAs w/seed UCCCUUU)		mature microRNA	CDH1,Creb,CTNNB1,EGFR,EIF4E,IKBKB,ITGB1,Jnk,MAP2K1,Mapk,MAPK1,miR-204-5p (and other miRNAs w/seed UCCCUUU),MKNK1,NFkB (complex),P38 MAPK,PRKCD,RB1,RELA,SRC,STAT3,STAT5a/b,STAT6,SYK,YAP1	3		0.507	0.00576	0.0083	AP3M2,CAD,CD82,CDC42EP3,CHCHD3,CLEC4E,COBL,COPG2,DBP,DLST,GHITM,GPR63,IER3,IGF2R,INTS1,KLHL31,LAMP1,LEF1,MAPT,MKI67,MRC2,MYO1D,NELL2,NOX5,PHF11,PTGER4,PXN,RCAN3,RPTOR,SIDT1,SMAD9,TMEM131,UBE4A,WIF1,ZNF608	35 (24)	23
PDK1		kinase	ADAM17,CEBPA,CEBPB,CTNNB1,ERBB2,ERK1/2,GATA1,Gsk3,IKBKB,Jnk,JUN,KRAS,MED1,MTOR,NCF1,NFE2L2,NOTCH1,PDK1,PRKAA1,PRKCB,RELA,SP1,TP53,TP73	3		0.316	0.00575	0.0256	ANXA6,AP3M2,ARL5C,CAMK1,CDC14B,CERS6,CSMD3,DLST,GABRA1,GPR63,HECW2,HNRNPU,HYAL3,ISLR2,JAZF1,JPT1,KCNQ3,KLHL29,LEF1,LEMD3,MAPT,mir-128,MRC2,MYO1D,NRSN1,NTRK1,PSMC3,PSMD8,PTGER4,PTPRE,PTPRU,RPA3,RPL7,S100A13,STX12,TBXAS1,TMCC1,TRAP1,WIF1,ZNF366	40 (24)	20
TNFRSF4		transmembrane receptor	Akt,CDKN1B,EP300,EZH2,FOXO1,FOXO3,Hsp27,IKBKB,IRF3,JUN,KRAS,MAPK1,MTOR,NFAT5,NFkB (complex),NOS2,NRAS,PI3K (complex),PPARGC1A,RB1,RELA,SP1,STAT3,STAT5a/b,TNFRSF4,TSC2	3		-0.493	0.00568	0.0113	AP3M2,CAMK1,CDC42EP3,CDK5RAP3,CHCHD3,CLEC4E,COBL,COPG2,DBP,DLST,GHITM,GPR63,HDGFL3,HECW2,HNRNPU,IGF2R,ISLR2,KCNQ3,LEMD3,MAPT,MKI67,MYO1D,NMI,NOX5,NPR3,NTRK1,PSMC3,PTGER4,PXN,RCAN3,RPA3,RPTOR,SFXN1,STX12,TMCC1,TMEFF2,TRIM11	37 (26)	23
MTORC1		complex	Akt,AKT1,AR,CDKN1B,CEBPB,Creb,EIF3A,ERBB2,ESR1,EZH2,Gsk3,GSK3B,IKBKB,JINK1/2,Jnk,KRAS,MAPK1,MTOR,MTORC1,NFAT5,NFE2L2,NOS2,NRAS,PARP1,PI3K (complex),PPARG,PPARGC1A,RB1,RELA,RICTOR,RPS6KB1,SIRT1,SP1,SQSTM1,SREBF1	3		-0.457	0.00565	0.0334	AP3M2,ATP5MC1,CAMK1,CD82,CDC14B,CHCHD3,COX7A2L,FAM186A,GABRA1,GHITM,HDGFL3,HECW2,ILDR2,INTS1,ISLR2,JPT1,KCNQ3,LEF1,LRCH1,MAPT,MRC2,MYO1D,NELL2,NPR3,NRSN1,PHF11,PITRM1,POU2F1,PSMC3,PSMD8,PTGER4,RCAN3,RPA3,RPL7,S100A13,SFXN1,SLC12A2,STX12,TBXAS1,TMCC1,TMEFF2,TRIM11,VAMP5	43 (35)	27
PLCD4		enzyme	Creb,DUSP1,EGFR,EIF4E,ERK1/2,FOXO3,GSK3B,Hsp27,IKBKB,Jnk,LIN28A,MAP2K1/2,MAPK1,MAPK14,MAPK3,MKNK1,NFE2L2,NFkB (complex),NR4A1,PARP1,PLCD4,PRKAA1,PRKCQ,RARA,RELA,Rsk,SLC9A1	3		1.183	0.00558	0.0088	AP3M2,CAD,CD82,CLEC4E,COBL,DBP,DLST,FAM186A,FUS,GABRA1,INTS1,KLHL29,LEF1,LEMD3,MAPT,MKI67,MRC2,MYO1D,NELL2,NMI,NOX5,NRSN1,NTRK1,PHF11,POU2F1,PSMC3,PTGER4,PTPRE,PXN,RCAN3,S100A13,SH2D2A,SLC12A2,UBE4A,WIF1	35 (27)	22
MDK		growth factor	Akt,ALK,CCND1,CDKN1B,CEBPA,CEBPB,Creb,EGFR,EIF4E,ERK1/2,ESR1,EZH2,FOXO1,GATA1,IRF3,Jnk,JUN,Mapk,MAPK1,MDK,MED1,MKNK1,MTOR,MYC,NFAT5,NFkB (complex),PARP1,PI3K (family),PPARGC1A,PRKAA1,RB1,RELA,RICTOR,RXRA,SIRT1,SP1,STAT3,STAT6,TP53	3		-1.089	0.00557	0.0326	AHI1,ANXA6,AP3M2,ATP5MC1,CAD,CDK5RAP3,CERS6,CHCHD3,CLEC4E,COBL,COPG2,COX7A2L,CSMD3,DBP,DLST,FAM186A,GHITM,HDGFL3,HECW2,IGF2R,INTS1,ISLR2,JAZF1,JPT1,KCNQ3,KLHL29,LRCH1,MAPT,mir-128,MRC2,NELL2,NMI,NTRK1,POU2F1,PSMD8,PTGER4,PTPRE,PXN,RCAN3,RPA3,RPTOR,RTN2,SLC12A2,STX12,TBXAS1,TMCC1,TMEFF2,TMEM131,TRAP1,UBE4A,WWOX,ZEB2,ZNF366,ZNF608	54 (39)	36
GEM		enzyme	26s Proteasome,Akt,AR,CDKN1B,EIF4E,EP300,ERK1/2,EZH2,FOXO1,FOXO3,GEM,Hsp27,IRF3,Jnk,JUN,MAPK1,MAPKAPK2,MTOR,NFAT5,NFkB (complex),PPARGC1A,RB1,RELA,SP1,STAT3,TP53,TSC2	3		0.457	0.00555	0.0202	ANXA6,AP3M2,ATP5MC1,CDC42EP3,CDK5RAP3,CHCHD3,CLEC4E,COBL,COPG2,CSMD3,GHITM,GPR63,HDGFL3,HECW2,HNRNPU,IGF2R,ILDR2,ISLR2,KCNQ3,LAMP1,LEMD3,MAPT,mir-128,MKI67,MRC2,NMI,NTRK1,PITRM1,PSMC3,PSMD8,PTGER4,PTPRE,PTPRU,PXN,RCAN3,RPA3,RPL7,RPTOR,STX12,TMCC1,TMEFF2,TRAP1,UBE4A	43 (27)	24
MRE11		enzyme	ATM,CHEK1,Creb,E2F3,ERK1/2,IKBKB,IKK (complex),IRF3,Jnk,JUN,MAPK1,MEF2D,MRE11,NFkB (complex),RB1,RELA,STAT3,STING1,TP53	3		0.169	0.00551	0.0102	ANXA6,AP3M2,ATP5MC1,BLK,CD82,CDC42EP3,CERS6,CHCHD3,CLEC4E,COBL,COPG2,CSMD3,DBP,DLST,GHITM,HNRNPU,IER3,IGF2R,INTS1,mir-128,MRC2,MYO1D,NEAT1,NMI,PHF11,PSMD8,PTGER4,PTPRE,PTPRU,PXN,RAD51C,RCAN3,RPL7,RPTOR,TRAP1	35 (19)	15
TLR5		transmembrane receptor	CEBPA,ERK1/2,estrogen receptor,FOXO1,FOXO3,Hsp27,IKBKB,IKK (complex),IRF3,ITGB1,Jnk,KRAS,MAP2K1,MAPK1,NFkB (complex),NOS2,NRAS,OXSR1,PI3K (complex),RAP1A,RB1,RELA,SP1,STAT3,STAT5a/b,TLR5,TP53	3		-0.469	0.00551	0.012	ANXA6,AP3M2,ATP5MC1,CAMK1,CDK5RAP3,CERS6,CHCHD3,CLEC4E,COBL,COPG2,CSMD3,DBP,DLST,GHITM,IER3,KCNQ3,LEF1,LEMD3,MAPT,mir-128,MRC2,MYO1D,NMI,NOX5,NPR3,NTRK1,PSMD8,PTGER4,PTPRE,PTPRU,PXN,RAD51C,RCAN3,RPL7,RPTOR,SFXN1,SIDT1,SLC12A2,TBXAS1,TRAP1,TRIM11	41 (27)	24
Ctf2		cytokine	Akt,CDKN1B,Ctf2,DUSP1,EGFR,EP300,ERK1/2,EZH2,FOXO1,FOXO3,INSR,IRF3,IRS1,Jnk,JUN,LIN28A,MAPK1,MAPK3,MTOR,NFAT5,NFE2L2,NR3C1,PARP1,PPARGC1A,RARA,RB1,RELA,SP1,STAT3,TP63	3		1.234	0.00543	0.0164	AP3M2,ATP5MC1,CAD,CDC42EP3,CDK5RAP3,CERS6,CHCHD3,COBL,COPG2,DLST,FAM186A,FUS,GABRA1,GHITM,GPR63,HDGFL3,HECW2,HNRNPU,ISLR2,KCNQ3,LEMD3,MAPT,MKI67,MRC2,NELL2,NMI,NOX5,NRSN1,NTRK1,PHF11,POU2F1,PTGER4,PTPRE,PTPRU,RCAN3,RPA3,RPTOR,S100A13,SH2D2A,STX12,TMCC1,TMEFF2	42 (30)	26
RXRG		ligand-dependent nuclear receptor	ATM,Creb,ERK1/2,H2AX,IKBKB,IKK (complex),Jnk,JUN,MEF2D,NFkB (complex),PARP1,RB1,RELA,RXRG,TP53	3		-0.365	0.00543	0.0087	ANXA6,AP3M2,ATP5MC1,BLK,CD82,CDC42EP3,CERS6,CHCHD3,CLEC4E,CSMD3,DBP,DLST,GHITM,HNRNPU,IER3,IGF2R,INTS1,mir-128,MRC2,MYO1D,NELL2,POU2F1,PSMD8,PTGER4,PTPRE,PTPRU,PXN,RAD51C,RPL7,TRAP1	30 (15)	12
CGA		other	CDKN1B,CGA,Creb,CYP19A1,FYN,Jnk,MAPK1,PPARG,PRKAA1,PRKAA2,STAT5B,STAT6,TP53	3		0.174	0.00542	0.0113	ANKS1B,ANXA6,ATP5MC1,CERS6,CSMD3,DBP,DIP2B,DLST,GPR63,IER3,IGF2R,INTS1,JAZF1,KLHL29,MAPT,mir-128,MRC2,NMI,NOX5,PHF11,PSMD8,PTPRE,PTPRU,PXN,RCAN3,RPL7,SPOP,TBXAS1,TMEFF2,TMEM131,TRAP1,VAMP5,ZNF608	33 (13)	13
mir-205		microRNA	Akt,CDKN1B,EP300,ERK1/2,EZH2,FOXO1,FOXO3,IRF3,Jnk,JUN,mir-205,MTOR,NFAT5,NFkB (complex),PPARGC1A,RB1,RELA,SP1,STAT3,STAT5a/b,TSC2	3		0.707	0.00541	0.0068	AP3M2,CDC42EP3,CDK5RAP3,CHCHD3,CLEC4E,COBL,COPG2,DBP,DLST,GHITM,GPR63,HDGFL3,HECW2,HNRNPU,IGF2R,ISLR2,KCNQ3,LEMD3,MAPT,MRC2,NOX5,PHF11,PSMC3,PTGER4,PTPRE,PXN,RPA3,RPTOR,STX12,TMCC1,TMEFF2,ZEB2	32 (21)	20
EPHA4		kinase	Akt,CDKN1B,EP300,EPHA4,EZH2,FOXO1,FOXO3,IRF3,Jnk,JUN,MTOR,NFAT5,NFkB (complex),PPARGC1A,RAC1,RB1,RELA,SP1,STAT3,STAT5a/b,TP53,TSC2	3		0	0.00541	0.0151	ANXA6,AP3M2,ATP5MC1,CDC42EP3,CDK5RAP3,CERS6,CHCHD3,CLEC4E,COBL,COPG2,CSMD3,GHITM,GPR63,HDGFL3,HECW2,HNRNPU,IGF2R,ISLR2,KCNQ3,LEMD3,MAPT,mir-128,MKI67,MRC2,NOX5,PHF11,PSMC3,PSMD8,PTGER4,PTPRU,PXN,RPA3,RPL7,RPTOR,STX12,TMCC1,TMEFF2,TRAP1	38 (22)	19
CCKBR		G-protein coupled receptor	ADCY,Akt,CCKBR,CDKN1B,ELAVL1,EP300,EZH2,FOXO1,FOXO3,HMGA1,IRF3,JAK2,Jnk,JUN,MTOR,MYC,NCL,NFAT5,NFkB (complex),PI3K (family),PPARGC1A,RB1,RELA,SP1,SREBF1,STAT3,STAT5B,STK11,SYK,TP53,TP63,TSC2	3		0	0.00539	0.0149	ANKS1B,ANXA6,AP3M2,CAD,CDC42EP3,CDK5RAP3,CERS6,CHCHD3,CLEC4E,COBL,COPG2,CSMD3,DIP2B,GHITM,GPR63,HDGFL3,HECW2,IGF2R,ISLR2,KCNQ3,KLHL29,KLHL31,LEMD3,MAPT,mir-128,MKI67,MRC2,PHF11,PSMC3,PSMD8,PTGER4,PTPRN2,PTPRU,PXN,RPA3,RPTOR,RTN2,S100A13,SFXN1,STX12,TMCC1,TMEFF2,TRAP1,UBE4A	44 (32)	28
DIRAS2		enzyme	APP,AR,CCND1,CEBPA,CEBPB,Creb,CREB1,DIRAS2,EGFR,EIF4E,EP300,FOXO1,Hsp27,IKBKB,Jnk,JUN,KAT5,Mapk,MET,MITF,MKNK1,MTOR,NFAT5,NFE2L2,NFkB (complex),P38 MAPK,PLA2G4A,PPARG,PPARGC1A,RB1,RELA,RICTOR,RXRA,Smad2/3,SP1,STAT5a/b,STAT6,TCF,TP53	3		-1.414	0.00535	0.0296	AHI1,ANXA6,AP3M2,ATP5MC1,CAD,CD82,CDK5RAP3,CERS6,CHCHD3,CLEC4E,COX7A2L,CSMD3,DBP,DLST,GABRA1,GHITM,HECW2,HNRNPU,IER3,ILDR2,INTS1,ISLR2,JPT1,KCNQ3,LEF1,LEMD3,MAPT,mir-128,MRC2,MYO1D,NELL2,NOX5,NRSN1,NTRK1,PHF11,PITRM1,PSMC3,PSMD8,PTGER4,RPA3,S100A13,STX12,TBXAS1,TMCC1,TMEM131,TRAP1,UBE4A,VAMP5,WWOX,ZNF608	50 (39)	38
IRF4		transcription regulator	APP,AR,CEBPA,estrogen receptor,FOXO1,IKBKB,IKK (complex),IRF4,Jnk,JUN,MTOR,NFE2L2,NFkB (complex),PLA2G4A,RICTOR,Smad2/3,SP1,STAT6,TP53,YAP1	3		0.603	0.00533	0.0149	ANXA6,AP3M2,ATP5MC1,CDC42EP3,CDK5RAP3,CERS6,CLEC4E,COX7A2L,CSMD3,DBP,DLST,GABRA1,GPR63,HNRNPU,IER3,ILDR2,ISLR2,KCNQ3,LEF1,LEMD3,MAPT,mir-128,MKI67,MRC2,MYO1D,NOX5,NRSN1,PHF11,PITRM1,PSMC3,PSMD8,PTGER4,PTPRU,PXN,RAD51C,S100A13,SLC12A2,STX12,TBXAS1,TMCC1,TMEM131,TRAP1,ZEB2,ZNF608	44 (20)	20
DR4/5		group	APP,AR,CASP8,DR4/5,EGFR,FOXO1,IKBKB,IRF3,Jnk,JUN,MTOR,NFE2L2,NFkB (complex),NOX1,PLA2G4A,RICTOR,Smad2/3,SP1,STAT6,TBK1,TCF,TP53,YAP1	3		0	0.0053	0.0167	ANXA6,ATP5MC1,CAD,CDC42EP3,CDK5RAP3,CERS6,CLEC4E,COX7A2L,CSMD3,DBP,DLST,GABRA1,GPR63,HNRNPU,ILDR2,ISLR2,KCNQ3,LEF1,LEMD3,MAPT,mir-128,MKI67,MRC2,MYO1D,NMI,NOX5,NRSN1,PITRM1,PSMC3,PSMD8,PTPRU,PXN,RPTOR,S100A13,SLC12A2,STX12,TMCC1,TMEM131,TRAP1,ZNF608	40 (23)	20
SOSTDC1		growth factor	Akt,APP,AR,CDKN1B,CEBPA,CEBPB,Creb,EGFR,EP300,ERBB2,ERK1/2,ESR1,EZH2,GATA1,IKBKB,IRF3,Jnk,MED1,MTOR,NFAT5,NFE2L2,NFkB (complex),PPARGC1A,PRKAA1,RB1,RELA,RICTOR,Smad2/3,SOSTDC1,SP1,SRC (family),STAT3,STAT6,TLR3,TP53	3		-1.664	0.00528	0.0361	ANXA6,AP3M2,ATP5MC1,CAD,CDC14B,CERS6,CHCHD3,CLEC4E,COBL,COPG2,COX7A2L,CSMD3,DBP,DLST,FAM186A,GABRA1,GHITM,GLRX3,HDGFL3,HECW2,ILDR2,INTS1,ISLR2,JAZF1,JPT1,KCNQ3,KLHL29,LAMP1,MAPT,mir-128,MRC2,MYO1D,NRSN1,NTRK1,PHF11,PITRM1,PSMD8,PTGER4,PTPRE,PTPRU,PXN,RPA3,RPTOR,S100A13,STX12,TBXAS1,TMCC1,TMEFF2,TMEM131,TRAP1,ZNF366,ZNF608	52 (35)	32
APPL2		other	Akt,APPL2,CDKN1B,EP300,EZH2,FOXO1,FOXO3,IRF3,Jnk,JUN,MTOR,NFAT5,NFkB (complex),PPARGC1A,RAC1,RB1,RELA,SP1,STAT3,STAT5a/b,TP53,TSC2	3		0	0.00528	0.014	ANXA6,AP3M2,ATP5MC1,CDC42EP3,CDK5RAP3,CERS6,CHCHD3,CLEC4E,COBL,COPG2,CSMD3,GHITM,GPR63,HDGFL3,HECW2,HNRNPU,IGF2R,ISLR2,KCNQ3,LEMD3,MAPT,mir-128,MKI67,MRC2,NOX5,PHF11,PSMC3,PSMD8,PTGER4,PTPRU,PXN,RPA3,RPL7,RPTOR,STX12,TMCC1,TMEFF2,TRAP1	38 (22)	19
VCAN		other	APP,AR,Cdc42,CEBPB,EGFR,FOXO1,IKBKB,IKK (complex),Jnk,MAP2K7,MAPK1,MAPK14,MTOR,NFE2L2,PARP1,RB1,RELA,RICTOR,STAT3,STAT5a/b,STAT6,VCAN	3		-1.441	0.00527	0.0221	AP3M2,CAD,CDK5RAP3,CHCHD3,COBL,COPG2,COX7A2L,GABRA1,GHITM,ILDR2,ISLR2,JPT1,LAMP1,LEF1,LEMD3,MAP2K4,MAPT,MRC2,MYO1D,NELL2,NMI,NOX5,NRSN1,PHF11,PITRM1,POU2F1,PTGER4,PTPRE,PXN,RAD51C,RCAN3,RPA3,S100A13,STX12,TMCC1,TMEM131,WIF1,ZEB2,ZNF608	39 (22)	21
THBS4		other	Akt,ATF6,Cdc42,CDKN1B,Creb,ELAVL1,EP300,EZH2,FOXO1,FOXO3,HMGA1,IGF1R,IRF3,Jnk,JUN,MTOR,MYC,MYD88,NCL,NFAT5,NFkB (complex),PAK2,PI3K (family),PPARGC1A,PTEN,PTK2,RB1,RELA,SP1,SREBF1,STAT3,SYK,THBS4,TP53,TSC2	3		0	0.00516	0.0167	ANXA6,AP3M2,ATP5MC1,CAD,CDK5RAP3,CERS6,CHCHD3,CLEC4E,COBL,COPG2,CSMD3,GHITM,HDGFL3,HECW2,IGF2R,INTS1,ISLR2,KCNQ3,KLHL31,LAMP1,LEMD3,MAPT,mir-128,MKI67,MRC2,NTRK1,PHF11,PSMC3,PSMD8,PTGER4,PTPRN2,PTPRU,PXN,RPA3,RPTOR,RTN2,S100A13,SFXN1,SMAD9,STX12,TMCC1,TMEFF2,TRAP1,UBE4A	44 (35)	31
CDH2		other	Akt,AR,CDH2,CDKN1B,CEBPA,CEBPB,Creb,EP300,ERK1/2,EZH2,FOXO1,GATA1,IRF3,Jnk,JUN,MED1,MLXIPL,MTOR,NFAT5,NFkB (complex),PPARGC1A,PRKAA1,RB1,RELA,SIRT1,SP1,STAT3,STAT5a/b,TSC2	3		-0.603	0.00516	0.0138	AP3M2,CDC42EP3,CDK5RAP3,CERS6,CHCHD3,CLEC4E,COBL,COPG2,DBP,DLST,GHITM,GPR63,HDGFL3,HECW2,HNRNPU,IER3,IGF2R,ILDR2,INTS1,ISLR2,JAZF1,JPT1,KCNQ3,KLHL29,LEMD3,LRCH1,MAPT,MKI67,MRC2,NOX5,PHF11,PITRM1,PSMC3,PTGER4,PTPRE,PXN,RPA3,RPL7,RPTOR,STX12,TBXAS1,TMCC1,TMEFF2,ZNF366	44 (29)	27
PIK3AP1		other	Akt,CDKN1B,CHUK,EP300,EZH2,FOXO1,FOXO3,IKBKB,IRF3,Jnk,JUN,MTOR,NFAT5,NFkB (complex),PIK3AP1,PPARGC1A,RAC1,RB1,RELA,SP1,STAT3,STAT5a/b,TP53,TSC2	3		0.16	0.00514	0.0124	ANXA6,AP3M2,ATP5MC1,CDC42EP3,CDK5RAP3,CERS6,CHCHD3,CLEC4E,COBL,COPG2,CSMD3,GHITM,GPR63,HDGFL3,HECW2,HNRNPU,IGF2R,ISLR2,KCNQ3,LEMD3,MAPT,mir-128,MKI67,MRC2,MYO1D,NOX5,PHF11,PSMC3,PSMD8,PTGER4,PTPRU,PXN,RPA3,RPL7,RPTOR,STX12,TMCC1,TMEFF2,TRAP1	39 (24)	20
PTCH1		transmembrane receptor	FYN,GLI1,JUN,MTOR,NFkB (complex),Notch,PPARG,PTCH1,RELA,SHH,SMO,STAT5a/b,TP53,TSC2	3		-1.48	0.00509	0.008	ANXA6,AP3M2,ATP5MC1,CAPRIN2,CD82,CDC42EP3,CERS6,CLEC4E,CSMD3,DBP,DLST,GPR63,HNRNPU,IER3,IGF2R,ISLR2,KLK1,LEF1,MAPT,mir-128,MKI67,NOX5,PSMC3,PSMD8,PTGER4,PTPRE,PTPRU,PXN,RPL7,SLC12A2,STX12,TBXAS1,TMCC1,TRAP1,USP48,VAMP5,ZEB2	37 (14)	12
WNK1		kinase	Creb,ERN1,FOXO1,HSF1,IKK (complex),Jnk,JUN,MAPK7,MEF2C,MEF2D,PPARG,PRKAA,RELA,SGK1,TP53,TSC2,WNK1	3		-1.061	0.00503	0.0076	ANXA6,AP3M2,ATP5MC1,BLK,CAD,CDK5RAP3,CERS6,COBL,CSMD3,DBP,DLST,GPR63,HNRNPU,IGF2R,INTS1,LEF1,LEMD3,MAPT,mir-128,MKI67,MRC2,PSMC3,PSMD8,PTGER4,PTPRU,PXN,RAD51C,RPL7,TBXAS1,TRAP1,VAMP5,ZEB2	32 (17)	13
FFAR4		G-protein coupled receptor	APP,AR,CEBPA,CEBPB,Creb,CREB1,EGFR,EIF4E,EP300,FFAR4,FOXO1,Hsp27,IKBKB,IL1B,Inflammasome (Nalp3, Asc, Casp1),Jnk,JUN,KAT5,MET,MITF,MKNK1,MTOR,NFAT5,NFE2L2,NFkB (complex),P38 MAPK,PLA2G4A,PPARG,PPARGC1A,RB1,RELA,RICTOR,Smad2/3,SP1,STAT6,TCF,TP53	3		1.697	0.005	0.0284	ANXA6,AP3M2,ATP5MC1,CAD,CD82,CDK5RAP3,CERS6,CHCHD3,CLEC4E,COX7A2L,CSMD3,DBP,DLST,GABRA1,GHITM,HECW2,HNRNPU,IER3,ILDR2,INTS1,ISLR2,JPT1,KCNQ3,LEF1,LEMD3,MAPT,mir-128,MRC2,MYO1D,NEAT1,NELL2,NMI,NOX5,NRSN1,NTRK1,PHF11,PITRM1,PSMC3,PSMD8,PTGER4,RPA3,S100A13,STX12,TBXAS1,TMCC1,TMEM131,TRAP1,UBE4A,VAMP5,ZNF608	50 (37)	35
NGFR		transmembrane receptor	Akt,AR,caspase,CCND1,CDKN1B,CEBPA,EGFR,EIF2AK2,EIF4E,EZH2,IKBKB,IKK (complex),IRF3,Jnk,JUN,Mapk,MAPK1,MAPK8,MKNK1,MTOR,NFAT5,NFATC2,NFE2L2,NFkB (complex),NGFR,NTRK1,PPARGC1A,RB1,RELA,RICTOR,RXRA,SIRT1,SP1,STAT3,STAT6	3		-0.762	0.00491	0.0258	AHI1,AP3M2,CAD,CHCHD3,CLEC4E,COBL,COPG2,COX7A2L,DBP,GABRA1,GHITM,HDGFL3,HECW2,HNRNPU,IER3,ILDR2,ISLR2,JPT1,KCNQ3,LRCH1,MRC2,MYO1D,NELL2,NMI,NRSN1,NTRK1,PHF11,PITRM1,PTGER4,PXN,RAD51C,RCAN3,RPA3,RPTOR,S100A13,STX12,TBXAS1,TMCC1,TMEFF2,TMEM131,UBE4A,WWOX,ZNF608	43 (35)	30
CD38		enzyme	AR,BTK,CBL,CCND1,CD38,CD3E,Creb,EIF4E,FOXO1,GSK3B,IGF1R,IKBKB,IKK (complex),Jnk,Mapk,MAPK14,MKNK1,MTOR,MYC,NFkB (complex),P38 MAPK,PPARG,PPARGC1A,RB1,RELA,RXRA,SIRT1,SREBF1,STAT3,STAT5B,TP53,XBP1	3		-0.714	0.0049	0.0252	AHI1,ANKS1B,ANXA6,AP3M2,ATP5MC1,CD82,CDK5RAP3,CERS6,CHCHD3,CLEC4E,COBL,COPG2,CSMD3,DBP,DIP2B,DLST,GHITM,HNRNPU,IGF2R,ILDR2,INTS1,ISLR2,JPT1,LEMD3,LRCH1,MAPT,mir-128,MRC2,MYO1D,NELL2,NTRK1,PITRM1,PSMD8,PTGER4,PTPRU,RAD51C,RPA3,RPL7,RTN2,S100A13,SLC12A2,STX12,TBXAS1,TMCC1,TRAP1,UBE4A,VAMP5,WIF1,WWOX	49 (32)	29
GBP2		enzyme	Akt,CDKN1B,EP300,EZH2,FOXO1,FOXO3,GBP2,Hsp27,IKBKB,IRF3,Jnk,JUN,KRAS,MAPK1,MTOR,MYC,NFAT5,NFkB (complex),NOS2,NRAS,PI3K (complex),PPARGC1A,Rac,RB1,RELA,SP1,STAT3,TSC2	3		1.121	0.00487	0.012	AP3M2,CAD,CAMK1,CDC42EP3,CDK5RAP3,CHCHD3,CLEC4E,COBL,COPG2,DBP,DLST,GHITM,GPR63,HDGFL3,HECW2,IGF2R,ISLR2,KCNQ3,LEMD3,MAPT,MKI67,MRC2,MYO1D,NMI,NPR3,NTRK1,PSMC3,PTGER4,PXN,RCAN3,RPA3,RPL7,RPTOR,RTN2,SFXN1,STX12,TMCC1,TMEFF2,TRIM11	39 (28)	24
TRPC6		ion channel	Akt,CDKN1B,EP300,EZH2,FOXO1,FOXO3,IRF3,Jnk,JUN,MTOR,NFAT5,NFkB (complex),PPARGC1A,RB1,RELA,RHOA,SP1,STAT3,STAT5a/b,TP53,TRPC6,TSC2	3		0	0.00485	0.0128	ANXA6,AP3M2,ATP5MC1,CDC42EP3,CDK5RAP3,CERS6,CHCHD3,CLEC4E,COBL,COPG2,CSMD3,GHITM,GPR63,HDGFL3,HECW2,HNRNPU,IGF2R,ISLR2,KCNQ3,LEMD3,MAPT,mir-128,MKI67,MRC2,NOX5,PHF11,PSMC3,PSMD8,PTGER4,PTPRU,PXN,RPA3,RPL7,RPTOR,STX12,TMCC1,TMEFF2,TRAP1	38 (22)	19
HCAR2		G-protein coupled receptor	CEBPB,Creb,CTNNB1,ERK1/2,GATA1,HCAR2,IKBKB,IKK (complex),JUN,MED1,MTOR,NFkB (complex),PRKAA1,SP1,STAT3,TP53	3		-0.973	0.00482	0.0133	ANXA6,ATP5MC1,CD82,CERS6,CLEC4E,COBL,COPG2,CSMD3,DBP,DLST,GPR63,HECW2,HNRNPU,IER3,IGF2R,INTS1,ISLR2,JAZF1,JPT1,KCNQ3,KLHL29,LEMD3,mir-128,MKI67,MYO1D,NMI,PSMD8,PTPRE,PTPRU,PXN,RAD51C,RPA3,RPL7,STX12,TMCC1,TRAP1,WIF1,ZNF366	38 (16)	16
FHIT		enzyme	Akt,CDKN1B,CEBPA,EP300,estrogen receptor,EZH2,FHIT,FOXO1,FOXO3,IKBKB,IKK (complex),IRF3,Jnk,JUN,MTOR,NFAT5,NFkB (complex),PPARGC1A,RB1,RELA,SP1,STAT3,STAT5a/b,TP53,TSC2	3		0.309	0.00482	0.012	ANXA6,AP3M2,ATP5MC1,CDK5RAP3,CERS6,CHCHD3,CLEC4E,COBL,COPG2,CSMD3,DBP,DLST,GHITM,HDGFL3,HECW2,HNRNPU,IER3,IGF2R,ISLR2,KCNQ3,LEMD3,MAPT,mir-128,MKI67,MRC2,MYO1D,NOX5,PHF11,PSMC3,PSMD8,PTGER4,PTPRU,PXN,RAD51C,RPA3,RPL7,RPTOR,STX12,TBXAS1,TMCC1,TMEFF2,TRAP1	42 (25)	23
SGMS2		enzyme	Akt,CDKN1B,CEBPA,EP300,estrogen receptor,EZH2,FOXO1,FOXO3,IKBKB,IKK (complex),IRF3,Jnk,JUN,MTOR,NFAT5,NFkB (complex),PPARGC1A,RB1,RELA,SGMS2,SP1,STAT3,STAT5a/b,TP53,TSC2	3		-0.309	0.00479	0.012	ANXA6,AP3M2,ATP5MC1,CDK5RAP3,CERS6,CHCHD3,CLEC4E,COBL,COPG2,CSMD3,DBP,DLST,GHITM,HDGFL3,HECW2,HNRNPU,IER3,IGF2R,ISLR2,KCNQ3,LEMD3,MAPT,mir-128,MKI67,MRC2,MYO1D,NOX5,PHF11,PSMC3,PSMD8,PTGER4,PTPRU,PXN,RAD51C,RPA3,RPL7,RPTOR,STX12,TBXAS1,TMCC1,TMEFF2,TRAP1	42 (25)	23
YAP1		transcription regulator	Akt,CDKN1B,Creb,EP300,ERBB2,ERBB4,ERN1,EZH2,FOXO1,FOXO3,GATA1,IRF3,JINK1/2,JUN,MAPK1,MTOR,MTORC1,NFAT5,NFE2,NFkB (complex),PARP1,PPARGC1A,RB1,RICTOR,SMAD2,SP1,SREBF1,STAT3,YAP1	3		-1.265	0.00469	0.0096	ATP5MC1,CAD,CDC14B,CDC42EP3,CDK5RAP3,CHCHD3,CLEC4E,COBL,COPG2,COX7A2L,DBP,DLST,GHITM,GPR63,HDGFL3,HECW2,HNRNPU,IGF2R,INTS1,ISLR2,JAZF1,KCNQ3,LAMP1,LEMD3,MAPT,MKI67,NELL2,NMI,POU2F1,PSMD8,RCAN3,RPA3,RPL7,RPTOR,S100A13,STX12,TBXAS1,TMCC1,TMEFF2,ZNF366	40 (29)	24
DEPTOR		other	Akt,CDKN1B,Creb,DEPTOR,EP300,ERK1/2,EZH2,FMR1,FOXO1,FOXO3,IRF3,Jnk,JUN,MTOR,NFAT5,NFkB (complex),RB1,RELA,RICTOR,RPS6KB1,SP1,STAT5a/b	3		1.219	0.00468	0.0105	AP3M2,ATP5MC1,CDC42EP3,CDK5RAP3,CHCHD3,CLEC4E,COX7A2L,DBP,DLST,GHITM,GPR63,HDGFL3,HECW2,HNRNPU,IGF2R,INTS1,ISLR2,KCNQ3,LEMD3,MAPT,mir-128,MRC2,NOX5,PHF11,PSMD8,PTGER4,PTPRE,PXN,RPL7,RPTOR,STX12,TMCC1,TMEFF2	33 (22)	19
NR3C2		ligand-dependent nuclear receptor	APP,AR,Creb,CTNNB1,FOXO1,IKBKB,Jnk,MTOR,NFE2L2,NFkB (complex),NR3C2,PPARG,RELA,RICTOR,Smad2/3,SP1,STAT6,TP53,YAP1	3		0.309	0.00468	0.0148	ANXA6,AP3M2,ATP5MC1,CDC42EP3,CDK5RAP3,CERS6,CLEC4E,COX7A2L,CSMD3,DBP,DLST,GABRA1,GPR63,ILDR2,INTS1,ISLR2,KCNQ3,LEF1,LEMD3,MAPT,mir-128,MKI67,MRC2,MYO1D,NRSN1,PHF11,PITRM1,PSMC3,PSMD8,PTGER4,PTPRU,PXN,S100A13,SLC12A2,STX12,TBXAS1,TMCC1,TMEM131,TRAP1,VAMP5,WIF1,ZNF608	42 (19)	18
LIG1		enzyme	ATM,Creb,ERK1/2,H2AX,IKBKB,IKK (complex),Jnk,JUN,LIG1,MEF2D,NFkB (complex),PARP1,RB1,RELA,TP53	3		0.365	0.00465	0.0087	ANXA6,AP3M2,ATP5MC1,BLK,CD82,CDC42EP3,CERS6,CHCHD3,CLEC4E,CSMD3,DBP,DLST,GHITM,HNRNPU,IER3,IGF2R,INTS1,mir-128,MRC2,MYO1D,NELL2,POU2F1,PSMD8,PTGER4,PTPRE,PTPRU,PXN,RAD51C,RPL7,TRAP1	30 (15)	12
SRPK1		kinase	Akt,CDKN1B,EP300,ERK1/2,EZH2,FOXO1,FOXO3,IRF3,Jnk,JUN,LIN28A,MAPK1,MAPK3,MTOR,NFAT5,NFE2L2,NFkB (complex),PPARGC1A,RB1,RELA,SP1,SRPK1,STAT3,STAT5a/b,TSC2	3		0.164	0.00461	0.0084	AP3M2,CDK5RAP3,CHCHD3,CLEC4E,COBL,COPG2,DBP,DLST,FUS,GABRA1,GHITM,GPR63,HDGFL3,HECW2,HNRNPU,IGF2R,ISLR2,KCNQ3,LEMD3,MAPT,MKI67,MRC2,NMI,NOX5,NRSN1,PHF11,PSMC3,PTGER4,PTPRE,PXN,RCAN3,RPA3,RPTOR,S100A13,STX12,TMCC1,TMEFF2	37 (25)	22
NCOA2		transcription regulator	APP,CDKN1B,Creb,CTNNB1,CYP19A1,EZH2,FYN,Jnk,JUN,LEF1,MAPK1,MYC,NCOA2,NFE2L2,NFkB (complex),NR5A2,P38 MAPK,PGR,PPARG,PRKAA1,PRKAA2,PTGS2,SREBF1,STAT3,STAT5B,STAT6,TCF7L2,TP53	3		0.577	0.00459	0.0167	ANKS1B,ANXA6,ATP5MC1,CAD,CERS6,CLEC4E,COBL,COPG2,CSMD3,DBP,DIP2B,DLST,GABRA1,GPR63,HDGFL3,HNRNPU,IER3,IGF2R,INTS1,KLHL29,LAMP1,LEF1,MAPT,mir-128,MRC2,NMI,NOX5,NRSN1,NTN4,PHF11,PSMC3,PSMD8,PTGER4,PTPRU,PXN,RCAN3,RPL7,RTN2,S100A13,SLC12A2,TBXAS1,TMEFF2,TMEM131,TRAP1,VAMP5,WIF1,ZEB2,ZNF608	48 (28)	26
CYTIP		other	APP,AR,CEBPA,CEBPB,Creb,CREB1,CYTIP,EGFR,EIF4E,EP300,FOXO1,Hsp27,IKBKB,Jnk,JUN,KAT5,Mapk,MAPK14,MITF,MKNK1,MTOR,NFAT5,NFE2L2,NFkB (complex),P38 MAPK,PLA2G4A,PPARG,PPARGC1A,RB1,RELA,RICTOR,Smad2/3,SP1,STAT3,STAT6,TP53,VAV	3		-1.414	0.00458	0.0251	ANXA6,AP3M2,ATP5MC1,CAD,CD82,CDK5RAP3,CERS6,CHCHD3,CLEC4E,COBL,COPG2,COX7A2L,CSMD3,DBP,DLST,GABRA1,GHITM,HECW2,HNRNPU,IER3,ILDR2,INTS1,ISLR2,JPT1,KCNQ3,LEMD3,MAPT,mir-128,MRC2,MYO1D,NELL2,NOX5,NRSN1,NTRK1,PHF11,PITRM1,PSMC3,PSMD8,PTGER4,RPA3,S100A13,STX12,TBXAS1,TMCC1,TMEM131,TRAP1,UBE4A,VAMP5,WIF1,ZNF608	50 (37)	35
IRF5		transcription regulator	APP,AR,CASP8,FOXO1,IKBKB,IRF3,IRF5,Jnk,JUN,MTOR,NFE2L2,NFkB (complex),PLA2G4A,RICTOR,Smad2/3,SP1,STAT6,TBK1,TCF,TP53,YAP1	3		0.316	0.00457	0.0132	ANXA6,ATP5MC1,CDC42EP3,CDK5RAP3,CERS6,CLEC4E,COX7A2L,CSMD3,DBP,DLST,GABRA1,GPR63,HNRNPU,ILDR2,ISLR2,KCNQ3,LEF1,LEMD3,MAPT,mir-128,MKI67,MRC2,MYO1D,NMI,NOX5,NRSN1,PITRM1,PSMC3,PSMD8,PTPRU,PXN,RPTOR,S100A13,SLC12A2,STX12,TMCC1,TMEM131,TRAP1,ZEB2,ZNF608	40 (21)	19
MUC4		other	Akt,CCND1,Cdc42,CDKN1B,CEBPA,CEBPB,Creb,EP300,ERK1/2,EZH2,Focal adhesion kinase,FOXO1,IRF3,JINK1/2,JUN,MAP2K7,Mapk,MED1,MTOR,MUC4,NANOG,NFAT5,NFE2,NFkB (complex),PAK2,PARP1,PPARGC1A,PRKAA1,PTEN,PTK2,RB1,RELA,SP1,STAT3,TP53,TSC2	3		-0.866	0.00456	0.0204	AHI1,ANXA6,AP3M2,CDK5RAP3,CERS6,CHCHD3,CLEC4E,COBL,COPG2,CSMD3,DBP,DLST,FUS,GHITM,GPR63,HDGFL3,HECW2,HNRNPU,IGF2R,INTS1,ISLR2,JPT1,KCNQ3,KLHL29,LAMP1,MAP2K4,MAPT,mir-128,NELL2,NTRK1,PHF11,POU2F1,PSMC3,PSMD8,PTGER4,PTPRE,PTPRU,RPA3,RPL7,RPTOR,SMAD9,STX12,TBXAS1,TMCC1,TMEFF2,TRAP1,WWOX,ZEB2	48 (36)	31
CHRM1		G-protein coupled receptor	CaMKII,Cdc42,CEBPA,CEBPB,CHRM1,CREB1,CXCR4,ERBB2,ERK1/2,GATA1,ITGB1,Jnk,MAP2K7,MAPK1,MAPK14,MED1,MTOR,Pkc(s),PLC,PRKAA1,RB1,RELA,TP53,TSC2	3		-1.581	0.00455	0.0214	ANKS1B,ANXA6,AP3M2,ATP5MC1,CDC14B,CERS6,CHCHD3,CSMD3,DBP,DLST,GHITM,HECW2,ISLR2,JAZF1,JPT1,KLHL29,LAMP1,LEF1,LEMD3,MAP2K4,MAPT,mir-128,MRC2,NOX5,PHF11,PSMC3,PSMD8,PTGER4,PTPRE,PTPRU,RCAN3,RPA3,RPL7,SIDT1,STX12,TBXAS1,TMCC1,TRAP1,WIF1,ZNF366	40 (24)	21
MFAP5		other	Akt,CDKN1B,Creb,ELAVL1,EP300,EZH2,FOXO1,FOXO3,HMGA1,IRF3,Jnk,JUN,MAPK1,MFAP5,MTOR,MYC,NCL,NFAT5,NFkB (complex),NOTCH2,PI3K (family),PPARGC1A,RB1,RELA,SP1,SREBF1,STAT3,SYK,TP53,TSC2	3		-0.603	0.00451	0.0148	ANXA6,AP3M2,ATP5MC1,CAD,CDC42EP3,CDK5RAP3,CERS6,CHCHD3,CLEC4E,COBL,COPG2,CSMD3,GHITM,GPR63,HDGFL3,HECW2,IGF2R,INTS1,ISLR2,KCNQ3,KLHL31,LEMD3,MAPT,mir-128,MKI67,MRC2,NMI,PSMC3,PSMD8,PTGER4,PTPRN2,PTPRU,PXN,RCAN3,RPA3,RPTOR,RTN2,S100A13,SFXN1,STX12,TMCC1,TMEFF2,TRAP1,UBE4A	44 (30)	28
PHLDB1		other	Akt,CDKN1B,Creb,EIF4E,EP300,ERK1/2,EZH2,FMR1,FOXO1,FOXO3,IRF3,Jnk,JUN,MTOR,NFAT5,NFkB (complex),PHLDB1,RB1,RELA,RICTOR,RPS6KB1,SP1,STAT3,STAT5a/b	3		-1.333	0.00444	0.0085	AP3M2,ATP5MC1,CDC42EP3,CDK5RAP3,CHCHD3,CLEC4E,COBL,COPG2,COX7A2L,DBP,DLST,GHITM,GPR63,HDGFL3,HECW2,HNRNPU,IGF2R,INTS1,ISLR2,KCNQ3,LEMD3,MAPT,mir-128,MRC2,NOX5,PHF11,PSMD8,PTGER4,PTPRE,PXN,RPL7,RPTOR,STX12,TMCC1,TMEFF2,UBE4A	36 (24)	21
PRR5		other	Akt,CDKN1B,Creb,EIF4E,EP300,ERK1/2,EZH2,FMR1,FOXO1,FOXO3,IRF3,Jnk,JUN,MTOR,NFAT5,NFkB (complex),PRR5,RB1,RELA,RICTOR,RPS6KB1,SP1,STAT3,STAT5a/b	3		-1.333	0.00444	0.0085	AP3M2,ATP5MC1,CDC42EP3,CDK5RAP3,CHCHD3,CLEC4E,COBL,COPG2,COX7A2L,DBP,DLST,GHITM,GPR63,HDGFL3,HECW2,HNRNPU,IGF2R,INTS1,ISLR2,KCNQ3,LEMD3,MAPT,mir-128,MRC2,NOX5,PHF11,PSMD8,PTGER4,PTPRE,PXN,RPL7,RPTOR,STX12,TMCC1,TMEFF2,UBE4A	36 (24)	21
SLC4A7		transporter	Akt,CDKN1B,EP300,ERK1/2,EZH2,FOXO1,FOXO3,IRF3,Jnk,JUN,LIN28A,MAPK1,MAPK3,MTOR,NFAT5,NFE2L2,NFkB (complex),PPARGC1A,RB1,RELA,SLC4A7,SP1,STAT3,STAT5a/b,TSC2	3		-0.164	0.00444	0.0082	AP3M2,CDK5RAP3,CHCHD3,CLEC4E,COBL,COPG2,DBP,DLST,FUS,GABRA1,GHITM,GPR63,HDGFL3,HECW2,HNRNPU,IGF2R,ISLR2,KCNQ3,LEMD3,MAPT,MKI67,MRC2,NMI,NOX5,NRSN1,PHF11,PSMC3,PTGER4,PTPRE,PXN,RCAN3,RPA3,RPTOR,S100A13,STX12,TMCC1,TMEFF2	37 (25)	22
LPIN1		phosphatase	APP,AR,CEBPA,CEBPB,CXCR4,EIF4E,ELAVL1,EP300,ERBB2,ERK1/2,FOXO1,Hsp27,IKBKB,INSR,ITGB1,Jnk,JUN,KAT5,LPIN1,MED1,MITF,MKNK1,MTOR,NANOG,NFAT5,NFE2,NFE2L2,P38 MAPK,Pkc(s),PPARG,PPARGC1A,PRKAA1,PRKCA,PRKCD,PRKCE,RELA,RICTOR,Smad2/3,STAT3,STAT6,TP53,TP73	3		-0.849	0.00443	0.0348	ANKS1B,ANXA6,AP3M2,ARL5C,ATP5MC1,CD82,CDC14B,CDK5RAP3,CERS6,COBL,COPG2,COX7A2L,CSMD3,DBP,FUS,GABRA1,HECW2,HNRNPU,IER3,IGF2R,ILDR2,ISLR2,JPT1,KLHL29,LAMP1,LEMD3,MAPT,mir-128,MRC2,MYO1D,NELL2,NRSN1,NTRK1,PITRM1,PSMC3,PSMD8,PTGER4,PTPRE,PTPRN2,RPA3,S100A13,SIDT1,STX12,TBXAS1,TMCC1,TMEM131,TRAP1,UBE4A,VAMP5,ZNF608	50 (42)	39
PTPRO		phosphatase	ABL1,Akt,CDKN1B,CEBPA,CEBPB,Creb,EIF4E,EP300,EPHB2,ERK1/2,ESR1,EZH2,FGFR1,FOXO1,FYN,GATA1,IRF3,Jnk,JUN,Mapk,MAPK1,MAPK9,MED1,MTOR,NFAT5,NFkB (complex),PPARGC1A,PRKAA1,PRKCD,PTPRO,PXN,RB1,RELA,RET,SP1,STAT3,TLR3,TP53,TP73,TSC2,TYRO3	3		1.697	0.00436	0.0226	ANXA6,AP3M2,ARL5C,ATP5MC1,CDK5RAP3,CERS6,CHCHD3,CLEC4E,COBL,COPG2,CSMD3,DBP,DLST,FAM186A,GHITM,GLRX3,HDGFL3,HECW2,HNRNPU,IER3,IGF2R,INTS1,ISLR2,JAZF1,JPT1,KCNQ3,KLHL29,LAMP1,MAPT,mir-128,MRC2,NMI,NOX5,PHF11,PSMC3,PSMD8,PTGER4,PTPRE,PXN,RCAN3,RPA3,RPL7,RPTOR,STX12,TBXAS1,TMCC1,TMEFF2,TRAP1,UBE4A,ZNF366	50 (41)	34
SUN1		other	ATM,Creb,ERK1/2,H2AX,IKBKB,IKK (complex),Jnk,JUN,MEF2D,NFkB (complex),PARP1,RB1,RELA,SUN1,TP53	3		-0.365	0.00429	0.0078	ANXA6,AP3M2,ATP5MC1,BLK,CD82,CDC42EP3,CERS6,CHCHD3,CLEC4E,CSMD3,DBP,DLST,GHITM,HNRNPU,IER3,IGF2R,INTS1,mir-128,MRC2,MYO1D,NELL2,POU2F1,PSMD8,PTGER4,PTPRE,PTPRU,PXN,RAD51C,RPL7,TRAP1	30 (15)	12
SUN2		other	ATM,Creb,ERK1/2,H2AX,IKBKB,IKK (complex),Jnk,JUN,MEF2D,NFkB (complex),PARP1,RB1,RELA,SUN2,TP53	3		-0.365	0.00429	0.0078	ANXA6,AP3M2,ATP5MC1,BLK,CD82,CDC42EP3,CERS6,CHCHD3,CLEC4E,CSMD3,DBP,DLST,GHITM,HNRNPU,IER3,IGF2R,INTS1,mir-128,MRC2,MYO1D,NELL2,POU2F1,PSMD8,PTGER4,PTPRE,PTPRU,PXN,RAD51C,RPL7,TRAP1	30 (15)	12
TPSD1		peptidase	CEBPB,Creb,DUSP1,EGFR,ERK1/2,IKK (complex),INSR,IRF3,LIN28A,MAP2K7,MAPK1,MAPK14,MAPK3,MAPK8,MAPK9,MTOR,NFE2L2,NR3C1,PARP1,PRKCD,RARA,RB1,RELA,SIRT1,SP1,TP53,TPSD1,TSC2	3		-1.18	0.00427	0.0221	ANXA6,AP3M2,ATP5MC1,CAD,CDC42EP3,CERS6,CHCHD3,CSMD3,DLST,FAM186A,FUS,GABRA1,GHITM,INTS1,ISLR2,JPT1,KCNQ3,LAMP1,LEF1,LEMD3,LRCH1,MAP2K4,mir-128,MKI67,NELL2,NOX5,NRSN1,NTRK1,PHF11,POU2F1,PSMC3,PSMD8,PTGER4,PTPRE,PTPRU,RAD51C,RCAN3,RPA3,RPL7,RPTOR,S100A13,SH2D2A,STX12,TMCC1,TRAP1,WIF1	46 (28)	24
CTBP2		transcription regulator	CTBP2,ERK1/2,FOXO1,FOXO3,Hdac,Hsp27,IKBKB,IRF3,Jnk,KRAS,MAP2K1,MAPK1,NFkB (complex),NOS2,NRAS,OXSR1,PI3K (complex),RB1,RELA,SP1,STAT5a/b	3		0	0.00423	0.0053	AP3M2,CAMK1,CDC42EP3,CDK5RAP3,CHCHD3,CLEC4E,DBP,DLST,GHITM,GPR63,KCNQ3,LEF1,LEMD3,MKI67,MRC2,MYO1D,NMI,NOX5,NPR3,NTRK1,PTGER4,PTPRE,PXN,RCAN3,RPTOR,SFXN1,SLC12A2,TRIM11,WIF1,ZEB2	30 (21)	19
WBP2		transcription regulator	APP,AR,FOXO1,GATA1,IKBKB,Jnk,JUN,MTOR,NFE2,NFE2L2,NFkB (complex),PLA2G4A,RICTOR,Smad2/3,SP1,STAT6,TP53,WBP2,YAP1	3		0.457	0.00413	0.0141	ANXA6,ATP5MC1,CDC42EP3,CDK5RAP3,CERS6,CLEC4E,COX7A2L,CSMD3,DBP,DLST,GABRA1,GPR63,HNRNPU,IGF2R,ILDR2,ISLR2,JAZF1,KCNQ3,LEF1,LEMD3,MAPT,mir-128,MKI67,MRC2,MYO1D,NOX5,NRSN1,PHF11,PITRM1,PSMC3,PSMD8,PTPRU,PXN,S100A13,SLC12A2,STX12,TBXAS1,TMCC1,TMEM131,TRAP1,ZEB2,ZNF366,ZNF608	43 (19)	19
PIP5K1C		kinase	Akt,Cdc42,CDKN1B,Creb,CREB1,EGFR,EP300,EZH2,IRF3,MAPK1,MTOR,NFAT5,PARP1,PIP5K1C,PPARGC1A,RB1,RELA,RHOA,STAT5a/b,STAT6,TP53,TSC2	3		-0.493	0.00409	0.0185	ANXA6,AP3M2,ATP5MC1,CAD,CERS6,CHCHD3,CSMD3,GHITM,GPR63,HDGFL3,HECW2,INTS1,ISLR2,LAMP1,MAPT,mir-128,NELL2,NMI,NOX5,PHF11,POU2F1,PSMC3,PSMD8,PTGER4,PTPRE,PTPRU,RCAN3,RPA3,RPL7,RPTOR,STX12,TMCC1,TMEFF2,TMEM131,TRAP1,ZEB2,ZNF608	37 (22)	19
Lh		complex	AR,Calcineurin protein(s),CDK5,CDKN1B,Creb,CYP19A1,DUSP1,EGFR,EIF4E,ERBB2,ITGB1,Jnk,JUN,Lh,LIN28A,MAPK1,MAPK3,MMP2,MMP9,MTOR,NFE2L2,NFkB (complex),PARP1,PPARG,PRKAA1,PRKAA2,RARA,STAT3,STAT5B,STAT6	3		1.677	0.00409	0.0188	ANKS1B,CAD,CDC14B,CLEC4E,COBL,COPG2,DIP2B,FAM186A,FUS,GABRA1,HNRNPU,ILDR2,INTS1,ISLR2,KCNQ3,KLHL29,LAMP1,MKI67,MRC2,NELL2,NMI,NOX5,NRSN1,NTRK1,PHF11,PITRM1,POU2F1,PSMC3,PXN,RCAN3,RPL7,S100A13,SH2D2A,SIDT1,SLC12A2,STX12,TBXAS1,TMCC1,TMEFF2,TMEM131,UBE4A,VAMP5,ZNF608	43 (30)	26
AGTR2		G-protein coupled receptor	AGTR2,Akt,CCND1,CDK2,CDKN1B,Creb,DUSP1,EZH2,FOXO1,FOXO3,IKBKB,INSR,IRF3,Jnk,KRAS,LIN28A,Mapk,MAPK1,MAPK3,MTOR,MYC,NFAT5,NFE2L2,NOS2,NR3C1,NRAS,PARP1,PI3K (complex),PIK3R1,PPARGC1A,PTEN,RARA,RELA,RHOA,SMARCA4,SP1,STAT3,TP53	3		0.849	0.00401	0.0231	AHI1,ANXA6,AP3M2,ATP5MC1,CAMK1,CDC42EP3,CDK5RAP3,CERS6,COPG2,CSMD3,DBP,FAM186A,FUS,GABRA1,HDGFL3,HECW2,IGF2R,INTS1,ISLR2,JPT1,KCNQ3,LEMD3,MELTF,mir-128,MKI67,MRC2,MYO1D,NMI,NOX5,NPR3,NRSN1,PHF11,POU2F1,PSMD8,PTGER4,PTPRU,RAD51C,RCAN3,RPA3,RPTOR,RTN2,S100A13,SFXN1,SH2D2A,STX12,TMCC1,TMEFF2,TRAP1,TRIM11,WWOX	50 (38)	31
ERC1		other	AR,CTNNB1,ERC1,ERK1/2,GLI1,IKBKB,IKBKG,IKK (complex),IRF3,IRF7,Jnk,MAP2K1,MTOR,STAT3,TP53,TP73	3		-0.333	0.00401	0.0126	ANXA6,ARL5C,ATP5MC1,CAPRIN2,CDC42EP3,CERS6,COBL,COPG2,CSMD3,DLST,GPR63,HNRNPU,ILDR2,ISLR2,KLK1,MAPT,mir-128,MRC2,MYO1D,NOX5,NTRK1,PHF11,PITRM1,PSMD8,PTPRE,PTPRU,RAD51C,RPL7,RPTOR,SLC12A2,STX12,TMCC1,TRAP1,USP48,WIF1,ZEB2	36 (16)	14
lipoxygenase		group	ARG1,CASP6,CASP9,Creb,GSK3B,lipoxygenase,MTOR,MTORC1,NFkB (complex),RELA,RICTOR,SREBF1	3		-1.528	0.00399	0.0026	AP3M2,ATP5MC1,CD82,CLEC4E,COX7A2L,DBP,IER3,INTS1,ISLR2,LEF1,MAPT,PHF11,PSMC3,PSMD8,PTGER4,RPL7,RPTOR,S100A13,SLC12A2,STX12,TMCC1	21 (12)	8
CAPNS1		peptidase	Akt,APP,AR,CAPNS1,CDKN1B,CEBPA,CEBPB,Creb,EGFR,EIF4E,EP300,ERK1/2,estrogen receptor,EZH2,FYN,GATA1,Hsp27,IKBKB,IKK (complex),IRF3,Jnk,JUN,KAT5,MED1,MITF,MKNK1,MTOR,NADPH oxidase,NCF1,NFAT5,NFE2L2,NFkB (complex),P38 MAPK,PPARG,PPARGC1A,PRKAA1,RB1,RELA,RICTOR,Smad2/3,SP1,STAT3,STAT6,TP53	3		-1.483	0.00398	0.0285	ANXA6,AP3M2,ATP5MC1,CAD,CD82,CERS6,CHCHD3,CLEC4E,COBL,COPG2,COX7A2L,CSMD3,DBP,DLST,GABRA1,GHITM,HDGFL3,HECW2,HNRNPU,HYAL3,IER3,ILDR2,INTS1,ISLR2,JAZF1,JPT1,KCNQ3,KLHL29,MAPT,mir-128,MRC2,MYO1D,NELL2,NRSN1,NTRK1,PHF11,PITRM1,PSMD8,PTGER4,PTPRE,PXN,RAD51C,RPA3,RPTOR,S100A13,STX12,TBXAS1,TMCC1,TMEFF2,TMEM131,TRAP1,UBE4A,VAMP5,ZNF366,ZNF608	55 (44)	41
IgG1		complex	CASP8,CASP9,CEBPA,CEBPB,Creb,CTNNB1,ERK1/2,GATA1,IgG1,IRF3,MED1,MTOR,NFkB (complex),P38 MAPK,PRKAA1,RELA,SP1,STAT3,STAT5a/b,TBK1,TP53	3		-0.632	0.00391	0.0108	ANXA6,AP3M2,ATP5MC1,CD82,CERS6,CLEC4E,COBL,COPG2,CSMD3,DBP,DLST,GPR63,HECW2,INTS1,ISLR2,JAZF1,JPT1,KCNQ3,KLHL29,LEF1,LEMD3,MAPT,mir-128,NMI,NOX5,PHF11,PSMD8,PTGER4,PTPRE,PTPRU,PXN,RPA3,RPL7,RPTOR,STX12,TBXAS1,TMCC1,TRAP1,WIF1,ZNF366	40 (21)	18
mir-34		microRNA	Akt,CDKN1B,EIF4E,EP300,EZH2,FOXO1,FOXO3,IRF3,ITGB1,JAK1,Jnk,JUN,MAPK1,mir-34,MKNK1,MTOR,MYCN,NANOG,NFAT5,NFkB (complex),Pdgfr,PPARGC1A,RB1,RELA,SOX2,SP1,STAT3,STAT6,TSC2	3		0.156	0.0039	0.0087	AP3M2,CDC42EP3,CDK5RAP3,CHCHD3,CLEC4E,COBL,COPG2,DBP,DLST,FUS,GHITM,GPR63,HDGFL3,HECW2,HNRNPU,ISLR2,KCNQ3,LEMD3,MAPT,MKI67,MRC2,NELL2,NMI,NTRK1,PHF11,PSMC3,PTGER4,PXN,RCAN3,RPA3,RPTOR,S100A13,SEMA5A,SIDT1,SLC12A2,STX12,TMCC1,TMEFF2,TMEM131,UBE4A,ZNF608	41 (29)	25
Ck2 alpha		group	AR,Cdc42,CEBPA,Ck2 alpha,CREB1,EGFR,EIF4E,FOXO1,GPI,IGF1R,IKBKB,IRF3,Jnk,MAPK1,MAPK14,MTOR,NFkB (complex),PTEN,STAT3,STAT5a/b,STAT6,TBK1,TP53,TSC2	3		0.152	0.0039	0.014	ANXA6,ATP5MC1,CAD,CDC42EP3,CDK5RAP3,CLEC4E,COBL,COPG2,CSMD3,DBP,DLST,GPR63,IER3,ILDR2,ISLR2,LAMP1,LEMD3,mir-128,MKI67,MRC2,MYO1D,NMI,NOX5,NTRK1,PHF11,PITRM1,PSMC3,PSMD8,PTPRU,RAD51C,RCAN3,RPL7,RPTOR,SLC12A2,STX12,TBXAS1,TMCC1,TMEM131,TRAP1,UBE4A,WIF1,ZEB2,ZNF608	43 (24)	23
HTR1A		G-protein coupled receptor	CaMKII,Cdc42,CEBPB,Creb,CTNNB1,DUSP1,EGR1,GSK3B,HTR1A,IGF1R,IKK (complex),JUN,MAP2K1,MAPK1,MTOR,MYC,NFkB (complex),NMDA Receptor,PARP1,PPARG,PSEN1,RELA,STAT3,STAT5a/b,TFEB	3		-1.667	0.00388	0.0103	AP3M2,ATP5MC1,CAD,CD82,CDC42EP3,CLEC4E,COBL,COPG2,DBP,IGF2R,INTS1,ISLR2,JPT1,LAMP1,LEMD3,MKI67,NELL2,NMI,NOX5,PHF11,POU2F1,PTGER4,PXN,RAD51C,RCAN3,RPA3,RPL7,RTN2,SH2D2A,SLC12A2,STX12,TBXAS1,TMCC1,VAMP5,WIF1,ZEB2	36 (25)	22
PSAP		other	DUSP1,EGFR,GBA,GSK3B,LIN28A,MAPK1,MAPK14,MAPK3,NFE2L2,NFkB (complex),NR3C1,P38 MAPK,PARP1,PSAP,RARA	3		1.177	0.00387	0.0037	CAD,CD82,CDC42EP3,CLEC4E,COBL,DBP,FAM186A,FUS,GABRA1,LEF1,MKI67,NELL2,NMI,NOX5,NRSN1,NTRK1,PHF11,POU2F1,PSMC3,PTPRE,PXN,RCAN3,S100A13,SH2D2A,WIF1,ZEB2	26 (15)	12
TICAM2		other	APP,AR,CEBPA,CEBPB,Creb,EGFR,EIF4E,EP300,estrogen receptor,FOXO1,Hsp27,IKBKB,IKK (complex),IRF3,IRF7,Jnk,JUN,KAT5,LIN28A,MAPK1,MAPK14,MAPK3,MET,MITF,MKNK1,MTOR,NFAT5,NFkB (complex),P38 MAPK,PLA2G4A,PPARG,PPARGC1A,RB1,RELA,RICTOR,Smad2/3,SP1,STAT5a/b,STAT6,SYK,TCF,TICAM2,TP53	3		-1.109	0.00386	0.0208	ANXA6,AP3M2,ATP5MC1,CAD,CD82,CDK5RAP3,CERS6,CHCHD3,CLEC4E,COX7A2L,CSMD3,DBP,DLST,FUS,GHITM,HECW2,HNRNPU,IER3,ILDR2,INTS1,ISLR2,JPT1,KCNQ3,KLHL31,LEF1,LEMD3,MAPT,mir-128,MRC2,MYO1D,NELL2,NMI,NOX5,NTRK1,PHF11,PITRM1,PSMD8,PTGER4,PXN,RAD51C,RCAN3,RPA3,RPTOR,STX12,TBXAS1,TMCC1,TMEM131,TRAP1,UBE4A,VAMP5,WIF1,ZNF608	52 (43)	41
ATG7		enzyme	Akt,AMPK,ATG7,CDKN1B,EP300,ERN1,EZH2,FOXO1,FOXO3,GATA1,IL1B,Inflammasome,IRF3,JAK2,Jnk,JUN,MED1,MKNK1,MTOR,NCF1,NFAT5,NFE2,NFkB (complex),PPARGC1A,PRKAA2,RB1,RELA,SHC1,STAT3,STAT5B,TP53,TP63,TSC2	3		1.313	0.00383	0.0146	ANKS1B,ANXA6,AP3M2,ATP5MC1,CAD,CD82,CDK5RAP3,CERS6,CHCHD3,CLEC4E,COBL,COPG2,CSMD3,DIP2B,DLST,GHITM,HDGFL3,HECW2,HNRNPU,HYAL3,IGF2R,ISLR2,JAZF1,KLHL29,LAMP1,LEF1,LEMD3,MAPT,mir-128,MRC2,NEAT1,NELL2,PHF11,PSMC3,PSMD8,PTGER4,PTPRU,PXN,RPA3,RPL7,RPTOR,STX12,TBXAS1,TMCC1,TMEFF2,TRAP1,ZNF366	47 (33)	28
MAP4K1		kinase	CEBPA,CEBPB,Creb,CTNNB1,CYP19A1,EGFR,ERK1/2,GATA1,INSR,IRF3,Jnk,MAP4K1,MAPK8,MED1,MTOR,NCL,NFATC2,NFkB (complex),P38 MAPK,PLCG1,PRKAA1,RELA,SIRT1,SP1,TP53	3		-0.156	0.00379	0.0142	ANXA6,AP3M2,ATP5MC1,CAD,CD82,CERS6,CLEC4E,CSMD3,DLST,GPR63,HECW2,INTS1,ISLR2,JAZF1,JPT1,KCNQ3,KLHL29,LEF1,LEMD3,LRCH1,MAPT,mir-128,MKI67,MRC2,NMI,PHF11,PSMD8,PTGER4,PTPRE,PTPRU,PXN,RPA3,RPL7,RPTOR,STX12,TBXAS1,TMCC1,TRAP1,UBE4A,WIF1,ZNF366	41 (25)	22
ZFPM2		transcription regulator	Akt,CDKN1B,Creb,EGFR,EP300,EZH2,FOXO1,FOXO3,Gsk3,IGF1R,IRF3,Jnk,JUN,MTOR,NFAT5,NFE2L2,NFkB (complex),PPARGC1A,PRKCD,RB1,RELA,SP1,STAT5a/b,TFEB,TP53,TSC2,ZFPM2	3		0.156	0.00376	0.0158	ANXA6,AP3M2,ATP5MC1,CAD,CDK5RAP3,CERS6,CHCHD3,CLEC4E,CSMD3,DBP,DLST,GABRA1,GHITM,HDGFL3,HECW2,HNRNPU,INTS1,ISLR2,KCNQ3,LAMP1,LEMD3,MAPT,mir-128,MKI67,MRC2,NOX5,NRSN1,PHF11,PSMC3,PSMD8,PTGER4,PTPRU,PXN,RPA3,RPL7,RPTOR,S100A13,STX12,TMCC1,TMEFF2,TRAP1	41 (27)	24
myosin-light-chain kinase		group	APP,AR,CDKN1B,CEBPA,CEBPB,Creb,CTNNB1,EGFR,EIF4E,ERBB2,ERK1/2,FOXO1,GATA1,IKBKB,Jnk,JUN,MAP2K1,MAP2K1/2,Mapk,MAPK1,MED1,MKNK1,MTOR,myosin-light-chain kinase,NFE2L2,NFkB (complex),NR4A1,PRKAA1,PXN,RARA,RELA,RICTOR,Smad2/3,SP1,STAT3,STAT6,STK11,TP53	3		1.236	0.00374	0.023	ANXA6,AP3M2,CAD,CDC14B,CDK5RAP3,CERS6,COBL,COPG2,COX7A2L,CSMD3,DBP,DLST,FAM186A,GABRA1,GPR63,HECW2,HNRNPU,ILDR2,INTS1,ISLR2,JAZF1,JPT1,KCNQ3,KLHL29,LAMP1,MAPT,mir-128,MRC2,MYO1D,NELL2,NOX5,NRSN1,NTRK1,PITRM1,PSMC3,PSMD8,PTGER4,PTPRE,PTPRU,PXN,RCAN3,RPA3,S100A13,STX12,TBXAS1,TMCC1,TMEFF2,TMEM131,TRAP1,UBE4A,WIF1,ZNF366,ZNF608	53 (38)	35
RIT2		enzyme	26s Proteasome,AR,BRAF,CEBPB,Creb,EGFR,EIF4E,Hsp27,IKK (complex),Jnk,JUN,MAP2K7,MAPK1,MAPK14,MTOR,RB1,RELA,RIT2,SP1,STAT3,TSC2	3		-0.522	0.00371	0.0103	AP3M2,CAD,CHCHD3,COBL,COPG2,GHITM,HNRNPU,IGF2R,ILDR2,INTS1,ISLR2,JPT1,KCNQ3,LAMP1,LEF1,LEMD3,MAP2K4,MAPT,MRC2,NMI,NOX5,NTRK1,PHF11,PITRM1,PSMC3,PTGER4,RAD51C,RCAN3,RPA3,STX12,TMCC1,UBE4A,WIF1	33 (21)	19
PTPN13		phosphatase	Akt,CDKN1B,EGFR,EP300,ERBB2,ERBB3,EZH2,FOXO1,FOXO3,Hsp27,IKBKB,IRF3,Jnk,JUN,KRAS,Mapk,MAPK1,MTOR,NFAT5,NFkB (complex),NOS2,NRAS,PI3K (complex),PI3K (family),PPARGC1A,PTPN13,RB1,RELA,RICTOR,SP1,STAT3	3		-1.234	0.0037	0.0101	AP3M2,ATP5MC1,CAD,CAMK1,CDC14B,CDC42EP3,CDK5RAP3,CHCHD3,CLEC4E,COBL,COPG2,COX7A2L,DBP,DLST,GHITM,GPR63,HDGFL3,HECW2,HNRNPU,IGF2R,ISLR2,KCNQ3,LEMD3,MAPT,MKI67,MRC2,MYO1D,NMI,NPR3,NTRK1,PSMD8,PTGER4,PXN,RCAN3,RPA3,RPL7,RPTOR,SFXN1,STX12,TMCC1,TMEFF2,TRIM11	42 (31)	27
ADRA1A		G-protein coupled receptor	ADRA1A,CEBPA,CEBPB,Creb,CTNNB1,ERK1/2,ESR1,FOXO1,GATA1,H/K/NRAS,Hsp27,IKBKB,IRF3,Jnk,JUN,KRAS,LIN28A,Mapk,MAPK3,MED1,MTOR,NFE2L2,NFkB (complex),NOS2,NR4A1,NRAS,PI3K (complex),PLC,PRKAA1,RB1,RELA,Rsk,SP1,STAT3,TP63	3		-0.745	0.0037	0.0099	AP3M2,CAMK1,CDK5RAP3,CHCHD3,CLEC4E,COBL,COPG2,DBP,DLST,FAM186A,FUS,GABRA1,GHITM,GPR63,HECW2,HNRNPU,IGF2R,INTS1,ISLR2,JAZF1,JPT1,KCNQ3,KLHL29,LEF1,MAPT,MRC2,MYO1D,NPR3,NRSN1,NTRK1,PSMC3,PTGER4,PTPRE,PTPRU,PXN,RPA3,RPTOR,S100A13,SFXN1,STX12,TBXAS1,TMCC1,TRIM11,WIF1,ZNF366	45 (35)	29
TOM1		transporter	Akt,CDKN1B,CEBPA,ERK1/2,EZH2,FOXO1,FOXO3,IKBKB,IKK (complex),IRF3,Jnk,JUN,MTOR,NFAT5,NFkB (complex),PPARGC1A,RB1,SP1,STAT3,STAT5a/b,TOM1,TP53,TSC2	3		-1.093	0.00369	0.009	ANXA6,ATP5MC1,CDC42EP3,CDK5RAP3,CERS6,CHCHD3,CLEC4E,COBL,COPG2,CSMD3,DBP,GHITM,GPR63,HDGFL3,HECW2,HNRNPU,IER3,IGF2R,ISLR2,KCNQ3,LEMD3,mir-128,MKI67,MRC2,MYO1D,NOX5,PHF11,PSMC3,PSMD8,PTPRE,PTPRU,PXN,RAD51C,RPA3,RPL7,RPTOR,STX12,TBXAS1,TMCC1,TMEFF2,TRAP1	41 (23)	21
Atg5		other	AR,Atg5,caspase,CEBPA,CEBPB,Creb,CTNNB1,EGFR,EIF2AK2,ERK1/2,ERN1,FOXO1,FYN,ITGB1,JAK2,Jnk,JUN,MED1,MTOR,NFE2,NFE2L2,NOS2,PRKAA1,PRKCD,RELA,RICTOR,Smad2/3,STAT3,STAT5B,STAT6,TCF,TP53,TP63	3		0.714	0.00369	0.0247	ANKS1B,ANXA6,AP3M2,ATP5MC1,CAD,CDK5RAP3,CERS6,COBL,COPG2,COX7A2L,CSMD3,DIP2B,DLST,GABRA1,GPR63,HECW2,HNRNPU,IGF2R,ILDR2,INTS1,ISLR2,JPT1,KLHL29,LAMP1,LEF1,LEMD3,MAPT,mir-128,MRC2,NMI,NRSN1,PHF11,PITRM1,PSMC3,PSMD8,PTGER4,PTPRE,PTPRU,RPA3,S100A13,SFXN1,SIDT1,STX12,TBXAS1,TMCC1,TMEM131,TRAP1,WIF1,ZNF608	49 (33)	30
CDC25A		phosphatase	Akt,CCND1,CCNE1,CDC25A,CDK2,CDKN1B,E2F1,E2F3,EP300,EZH2,FLNA,FOXO1,FOXO3,IRF3,Jnk,JUN,MTOR,MYC,NFAT5,NFkB (complex),PPARG,PPARGC1A,RB1,RELA,SMARCA4,SP1,STAT3,STAT5a/b,TP53,TSC2	3		-1.021	0.00368	0.0122	AHI1,ANXA6,AP3M2,ATP5MC1,CAD,CDK5RAP3,CERS6,CHCHD3,CLEC4E,COBL,COPG2,CSMD3,DBP,DLST,GHITM,GPR63,HDGFL3,HECW2,IGF2R,ISLR2,JPT1,KCNQ3,LEMD3,MAPT,MELTF,mir-128,MRC2,NEAT1,NOX5,PHF11,PSMC3,PSMD8,PTGER4,PTPRU,PXN,RPA3,RPL7,RPTOR,RTN2,STX12,TBXAS1,TMCC1,TMEFF2,TRAP1,VAMP5,WWOX,ZEB2	47 (30)	26
sGC		complex	CCND1,CEBPA,CEBPB,Creb,CTNNB1,ERK1/2,GATA1,JUN,MED1,MTOR,NFkB (complex),PRKAA1,RB1,RELA,sGC,SP1,STAT3,TP53	3		-0.926	0.00364	0.0086	AHI1,ANXA6,AP3M2,ATP5MC1,CD82,CERS6,CHCHD3,CLEC4E,COBL,COPG2,CSMD3,DBP,DLST,GHITM,GPR63,HECW2,HNRNPU,IGF2R,INTS1,ISLR2,JAZF1,JPT1,KCNQ3,KLHL29,LEF1,MAPT,mir-128,PSMD8,PTGER4,PTPRE,PTPRU,PXN,RPA3,RPL7,STX12,TBXAS1,TMCC1,TRAP1,WIF1,WWOX,ZEB2,ZNF366	42 (18)	17
NPPC		other	CEBPA,CEBPB,Creb,CTNNB1,DUSP1,EGFR,ERK1/2,GATA1,INSR,IRF3,Jnk,JUN,LIN28A,MAPK1,MAPK14,MAPK8,MED1,MTOR,NFkB (complex),NPPC,PARP1,PRKAA1,RARA,RELA,SIRT1,SP1,STAT3,TP53	3		1.155	0.00359	0.0164	ANXA6,AP3M2,ATP5MC1,CAD,CERS6,CLEC4E,COBL,COPG2,CSMD3,DLST,FAM186A,FUS,GPR63,HECW2,HNRNPU,IGF2R,INTS1,ISLR2,JAZF1,JPT1,KCNQ3,KLHL29,LEF1,LEMD3,LRCH1,mir-128,MKI67,MRC2,NELL2,NMI,NOX5,NTRK1,PHF11,POU2F1,PSMD8,PTGER4,PTPRE,PTPRU,RCAN3,RPA3,RPL7,RPTOR,SH2D2A,STX12,TBXAS1,TMCC1,TRAP1,ZNF366	48 (28)	26
CSF3R		transmembrane receptor	ABL1,APP,AR,CSF3R,EGFR,FCGR2B,FOXO1,FYN,HCK,IKBKB,IRF3,Jnk,JUN,LYN,MAPK1,MTOR,NFE2L2,NFkB (complex),PLA2G4A,PLCG2,PRKCD,RICTOR,RIPK2,Smad2/3,SP1,STAT6,SYK,TCF,TP53,YAP1	3		-0.457	0.00355	0.0133	ANXA6,ARL5C,ATP5MC1,CAD,CDC42EP3,CDK5RAP3,CERS6,CLEC4E,COX7A2L,CSMD3,DBP,DLST,GABRA1,GPR63,HNRNPU,ILDR2,ISLR2,KCNQ3,KLHL31,LAMP1,LEF1,LEMD3,MAPT,mir-128,MRC2,MYO1D,NMI,NOX5,NRSN1,PITRM1,PSMC3,PSMD8,PTPRU,PXN,RCAN3,RPTOR,S100A13,SLC12A2,STX12,TMCC1,TMEM131,TRAP1,ZNF608	43 (30)	27
ARHGAP1		other	APP,AR,ARHGAP1,Cdc42,FOXO1,IKBKB,Jnk,JUN,MTOR,NFE2L2,NFkB (complex),PLA2G4A,RICTOR,Smad2/3,SP1,STAT6,TCF,TP53,YAP1	3		0	0.00355	0.0114	ANXA6,ATP5MC1,CDC42EP3,CDK5RAP3,CERS6,CLEC4E,COX7A2L,CSMD3,DBP,DLST,GABRA1,GPR63,HNRNPU,ILDR2,ISLR2,KCNQ3,LAMP1,LEF1,LEMD3,MAPT,mir-128,MKI67,MRC2,MYO1D,NOX5,NRSN1,PHF11,PITRM1,PSMC3,PSMD8,PTPRU,PXN,S100A13,SLC12A2,STX12,TMCC1,TMEM131,TRAP1,ZEB2,ZNF608	40 (19)	18
POMGNT1		enzyme	DUSP1,EGFR,GSK3B,LIN28A,MAPK1,MAPK14,MAPK3,NFE2L2,NFkB (complex),NR3C1,PARP1,POMGNT1,RARA	3		-1.177	0.00351	0.0032	CAD,CD82,CDC42EP3,CLEC4E,COBL,DBP,FAM186A,FUS,GABRA1,LEF1,MKI67,NELL2,NMI,NOX5,NRSN1,NTRK1,PHF11,POU2F1,PSMC3,PTPRE,PXN,RCAN3,S100A13,SH2D2A,WIF1,ZEB2	26 (13)	11
SIGIRR		transmembrane receptor	AR,CEBPA,ESR1,FOXO1,FOXO3,HSF1,IKBKB,IKK (complex),Jnk,MTOR,MYC,NFE2L2,NFkB (complex),RELA,RICTOR,SIGIRR,SIRT1,Smad2/3,SP1,STAT3,STAT6,TCF,TFEB,TP53,YAP1	3		0.143	0.00351	0.0153	ANXA6,AP3M2,ATP5MC1,CAD,CDC42EP3,CDK5RAP3,CERS6,CLEC4E,COBL,COPG2,COX7A2L,CSMD3,DBP,DLST,FAM186A,GABRA1,GPR63,IER3,ILDR2,ISLR2,KCNQ3,LAMP1,LEF1,LEMD3,LRCH1,MAPT,mir-128,MRC2,MYO1D,NRSN1,NTRK1,PHF11,PITRM1,PSMC3,PSMD8,PTGER4,PTPRU,PXN,RAD51C,RTN2,S100A13,SLC12A2,STX12,TBXAS1,TMCC1,TMEM131,TRAP1,ZEB2,ZNF608	49 (25)	24
Cyp2j9		enzyme	Akt,AMPK,CDKN1B,Cyp2j9,EP300,ERK1/2,ERN1,EZH2,FOXO1,FOXO3,IRF3,Jnk,JUN,MAPK1,MED1,MKNK1,MTOR,NFAT5,NFkB (complex),PPARGC1A,PRKAA2,RB1,RELA,SP1,STAT3,STAT5a/b,TSC2,YAP1	3		-0.493	0.0035	0.0081	AP3M2,CAD,CDC42EP3,CDK5RAP3,CHCHD3,CLEC4E,COBL,COPG2,DBP,DLST,GHITM,GPR63,HDGFL3,HECW2,HNRNPU,IGF2R,ISLR2,KCNQ3,KLHL29,LEMD3,MAPT,MKI67,MRC2,NELL2,NMI,NOX5,PHF11,PSMC3,PTGER4,PTPRE,PXN,RCAN3,RPA3,RPTOR,STX12,TMCC1,TMEFF2	37 (28)	25
SSTR2		G-protein coupled receptor	CASP8,caspase,Creb,CTNNB1,EGFR,Gsk3,IGF1R,IRF3,MTOR,NFE2L2,NFkB (complex),P38 MAPK,PPARG,PRKCD,SSTR2,STAT3,TFEB,TP53	3		0.48	0.0035	0.0097	ANXA6,ATP5MC1,CAD,CD82,CDC42EP3,CERS6,CLEC4E,COBL,COPG2,CSMD3,DBP,DLST,GABRA1,GPR63,IER3,IGF2R,INTS1,ISLR2,LAMP1,LEF1,MAPT,mir-128,MKI67,NRSN1,PHF11,PSMC3,PSMD8,PTPRU,PXN,RPL7,RPTOR,S100A13,SLC12A2,STX12,TBXAS1,TMCC1,TRAP1,VAMP5,WIF1	39 (18)	14
FGFR3		kinase	CCL3,Cdc42,CEBPA,CEBPB,Creb,CTNNB1,DUSP1,EGFR,ERK1/2,FGFR3,GATA1,GSK3B,JUN,LIN28A,MAPK1,MAPK14,MAPK3,MED1,MTOR,NFE2L2,PARP1,PRKAA1,RARA,RELA,SP1,STAT3,TP63	3		-1.093	0.00348	0.0078	AP3M2,CAD,CD82,COBL,COPG2,FAM186A,FUS,GABRA1,HECW2,HNRNPU,IGF2R,INTS1,ISLR2,JAZF1,JPT1,KCNQ3,KLHL29,LAMP1,LEMD3,MAPT,MKI67,NELL2,NMI,NOX5,NRSN1,NTRK1,PHF11,POU2F1,PSMC3,PTGER4,PTPRE,PTPRU,RCAN3,RPA3,S100A13,SH2D2A,STX12,TBXAS1,TMCC1,WIF1,ZNF366	41 (27)	24
CTH		enzyme	Akt,CASP1,CDKN1B,CEBPB,Creb,CTH,DUSP1,EP300,EZH2,FOXO1,IKK (complex),IRF3,LIN28A,MAP2K7,MAPK1,MAPK14,MAPK3,MTOR,NFAT5,NFE2L2,PARP1,PPARGC1A,RARA,RB1,RELA,SP1,TP53	3		-1.938	0.00347	0.02	ANXA6,AP3M2,ATP5MC1,CDK5RAP3,CERS6,CHCHD3,CSMD3,DLST,FAM186A,FUS,GABRA1,GHITM,HDGFL3,HECW2,INTS1,ISLR2,JPT1,KCNQ3,LEF1,MAP2K4,MAPT,mir-128,MKI67,NELL2,NMI,NOX5,NRSN1,NTRK1,PHF11,POU2F1,PSMD8,PTGER4,PTPRU,RAD51C,RCAN3,RPA3,RPL7,RPTOR,S100A13,SH2D2A,STX12,TMCC1,TMEFF2,TRAP1,WIF1	45 (27)	23
OPRD1		G-protein coupled receptor	DUSP1,EGFR,GSK3B,LIN28A,MAPK1,MAPK14,MAPK3,NFE2L2,NFkB (complex),NR3C1,OPRD1,PARP1,RARA	3		1.177	0.00337	0.0029	CAD,CD82,CDC42EP3,CLEC4E,COBL,DBP,FAM186A,FUS,GABRA1,LEF1,MKI67,NELL2,NMI,NOX5,NRSN1,NTRK1,PHF11,POU2F1,PSMC3,PTPRE,PXN,RCAN3,S100A13,SH2D2A,WIF1,ZEB2	26 (13)	11
CD72		transmembrane receptor	CD72,DUSP1,EGFR,GSK3B,LIN28A,MAPK1,MAPK14,MAPK3,NFE2L2,NFkB (complex),NR3C1,PARP1,RARA	3		-1.177	0.00337	0.0029	CAD,CD82,CDC42EP3,CLEC4E,COBL,DBP,FAM186A,FUS,GABRA1,LEF1,MKI67,NELL2,NMI,NOX5,NRSN1,NTRK1,PHF11,POU2F1,PSMC3,PTPRE,PXN,RCAN3,S100A13,SH2D2A,WIF1,ZEB2	26 (13)	11
TRIO		kinase	APP,AR,Cdc42,CEBPA,CEBPB,Creb,CREB1,EGFR,EIF4E,EP300,FOXO1,Hsp27,IKBKB,Jnk,JUN,KAT5,MET,MITF,MKNK1,MTOR,NFAT5,NFE2L2,NFkB (complex),P38 MAPK,PLA2G4A,PPARG,PPARGC1A,RAC1,RB1,RELA,RHOG,RICTOR,SP1,STAT3,STAT6,SYK,TCF,TRIO	3		-1.372	0.00337	0.0163	AP3M2,CAD,CD82,CDK5RAP3,CHCHD3,CLEC4E,COBL,COPG2,COX7A2L,GABRA1,GHITM,HECW2,HNRNPU,IER3,ILDR2,INTS1,ISLR2,JPT1,KCNQ3,KLHL31,LAMP1,LEF1,LEMD3,MAPT,MRC2,MYO1D,NELL2,NOX5,NRSN1,NTRK1,PHF11,PITRM1,PSMC3,PTGER4,RPA3,S100A13,STX12,TBXAS1,TMCC1,TMEM131,UBE4A,VAMP5,ZNF608	43 (38)	35
GNB1		enzyme	ADCY,Akt,AR,CDKN1B,DUSP1,EP300,ERK1/2,ERN1,EZH2,FOXO1,FOXO3,GNB1,IRF3,Jnk,JUN,Lfa-1,MTOR,NFAT5,NFkB (complex),PPARGC1A,PRKD1,PTEN,RB1,SP1,STAT3,STAT5a/b,STK11,TSC2	3		-0.333	0.00336	0.0069	ATP5MC1,CAD,CDC42EP3,CDK5RAP3,CERS6,CHCHD3,CLEC4E,COBL,COPG2,DBP,DLST,GHITM,HDGFL3,HECW2,HNRNPU,IGF2R,ILDR2,ISLR2,KCNQ3,KLHL29,LEMD3,MAPT,MRC2,NOX5,NTRK1,PHF11,PITRM1,PSMC3,PTPRE,RAD51C,RPA3,RPTOR,SH2D2A,STX12,TMCC1,TMEFF2	36 (28)	23
IGF2BP2		translation regulator	DUSP1,EGFR,GSK3B,IGF2BP2,LIN28A,MAPK1,MAPK14,MAPK3,NFE2L2,NFkB (complex),NR3C1,PARP1,RARA	3		1.177	0.00334	0.0029	CAD,CD82,CDC42EP3,CLEC4E,COBL,DBP,FAM186A,FUS,GABRA1,LEF1,MKI67,NELL2,NMI,NOX5,NRSN1,NTRK1,PHF11,POU2F1,PSMC3,PTPRE,PXN,RCAN3,S100A13,SH2D2A,WIF1,ZEB2	26 (13)	11
SGCG		other	DUSP1,EGFR,GSK3B,LIN28A,MAPK1,MAPK14,MAPK3,NFE2L2,NFkB (complex),NR3C1,PARP1,RARA,SGCG	3		-1.177	0.00332	0.0029	CAD,CD82,CDC42EP3,CLEC4E,COBL,DBP,FAM186A,FUS,GABRA1,LEF1,MKI67,NELL2,NMI,NOX5,NRSN1,NTRK1,PHF11,POU2F1,PSMC3,PTPRE,PXN,RCAN3,S100A13,SH2D2A,WIF1,ZEB2	26 (13)	11
CNN3		other	CNN3,DUSP1,EGFR,GSK3B,LIN28A,MAPK1,MAPK14,MAPK3,NFE2L2,NFkB (complex),NR3C1,PARP1,RARA	3		1.177	0.00332	0.0029	CAD,CD82,CDC42EP3,CLEC4E,COBL,DBP,FAM186A,FUS,GABRA1,LEF1,MKI67,NELL2,NMI,NOX5,NRSN1,NTRK1,PHF11,POU2F1,PSMC3,PTPRE,PXN,RCAN3,S100A13,SH2D2A,WIF1,ZEB2	26 (13)	11
ADRA2C		G-protein coupled receptor	ADRA2C,DUSP1,EGFR,GSK3B,LIN28A,MAPK1,MAPK14,MAPK3,NFE2L2,NFkB (complex),NR3C1,PARP1,RARA	3		1.177	0.00332	0.0029	CAD,CD82,CDC42EP3,CLEC4E,COBL,DBP,FAM186A,FUS,GABRA1,LEF1,MKI67,NELL2,NMI,NOX5,NRSN1,NTRK1,PHF11,POU2F1,PSMC3,PTPRE,PXN,RCAN3,S100A13,SH2D2A,WIF1,ZEB2	26 (13)	11
PDE6G		enzyme	DUSP1,EGFR,GSK3B,LIN28A,MAPK1,MAPK14,MAPK3,NFE2L2,NFkB (complex),NR3C1,PARP1,PDE6G,RARA	3		1.177	0.00332	0.0029	CAD,CD82,CDC42EP3,CLEC4E,COBL,DBP,FAM186A,FUS,GABRA1,LEF1,MKI67,NELL2,NMI,NOX5,NRSN1,NTRK1,PHF11,POU2F1,PSMC3,PTPRE,PXN,RCAN3,S100A13,SH2D2A,WIF1,ZEB2	26 (13)	11
SLC19A1		transporter	IRF3,MTOR,NFkB (complex),RELA,SLC19A1,STAT3,STING1,TBK1,TP53	3		0.18	0.00331	0.0043	ANXA6,AP3M2,ATP5MC1,CD82,CDC42EP3,CERS6,CLEC4E,COBL,COPG2,CSMD3,DLST,GPR63,ISLR2,LEF1,MAPT,mir-128,MKI67,NMI,PHF11,PSMD8,PTGER4,PTPRE,PTPRU,PXN,RPL7,RPTOR,SLC12A2,STX12,TMCC1,TRAP1,ZEB2	31 (9)	7
HLA-DQ		complex	CEBPA,CEBPB,Creb,CTNNB1,EIF4E,ERK1/2,GATA1,HLA-DQ,IKBKB,JUN,MAP2K1/2,MAPK1,MED1,MKNK1,MTOR,NFATC2,PRKAA1,RARA,RELA,SP1,STAT3,TP53	3		-0.302	0.0033	0.0112	ANXA6,AP3M2,ATP5MC1,CD82,CERS6,COBL,COPG2,CSMD3,DLST,FAM186A,GPR63,HECW2,HNRNPU,IGF2R,INTS1,ISLR2,JAZF1,JPT1,KCNQ3,KLHL29,LEF1,MAPT,mir-128,MKI67,MYO1D,NELL2,NMI,NOX5,NTRK1,PHF11,PSMD8,PTGER4,PTPRE,PTPRU,RCAN3,RPA3,RPL7,STX12,TBXAS1,TMCC1,TRAP1,UBE4A,WIF1,ZNF366	44 (22)	20
MYOC		other	Akt,AKT1,CDKN1B,CEBPB,CXCR4,DUSP1,EIF4E,ELAVL1,ERBB2,ERK1/2,ESR1,EZH2,FOXO1,FOXO3,GATA1,HMGA1,Jnk,JUN,LIN28A,MAPK1,MAPK3,MED1,Mek,MTOR,MXD1,MYOC,NCL,NFAT5,NFE2L2,NFkB (complex),PARP1,PI3K (family),PIK3CB,Pka,PPARG,PPARGC1A,PRKAA1,RAF1,RARA,RELA,RHO,SIRT1,SP1,STAT3,TSC2	3		1.131	0.0033	0.0205	ANKS1B,AP3M2,CDC14B,CDC42EP3,CDK5RAP3,CLEC4E,COBL,COPG2,COX7A2L,FAM186A,FUS,GABRA1,HDGFL3,HECW2,HNRNPU,IER3,IGF2R,ISLR2,JAZF1,JPT1,KCNQ3,KLHL29,LAMP1,LEMD3,LRCH1,MKI67,MRC2,NELL2,NMI,NOX5,NRSN1,NTRK1,PDC,PHF11,POU2F1,PSMC3,PTGER4,PTPRE,PTPRN2,PXN,RCAN3,RPA3,S100A13,SFXN1,SH2D2A,TMCC1,TMEFF2,UBE4A,VAMP5,ZNF366	50 (45)	37
IL5		cytokine	Akt,CCND1,CDKN1B,CEBPA,CEBPB,Cpla2,Creb,DUSP1,EGFR,EIF4E,EP300,ERK1/2,ERN1,EZH2,FOXO1,GATA1,IL5,IRF3,JAK2,JUN,LIN28A,Mapk,MAPK1,MED1,MKNK1,MTOR,NFAT5,PARP1,PPARG,PPARGC1A,PRKAA1,RARA,RB1,RELA,RXRA,SMAD2,SP1,STAT3,STAT5a/b,STAT5B,TSC2	3		-1.131	0.00328	0.0137	AHI1,ANKS1B,ANXA6,AP3M2,CAD,CDK5RAP3,CHCHD3,COBL,COPG2,DBP,DIP2B,DLST,FAM186A,FUS,GHITM,GPR63,HDGFL3,HECW2,HNRNPU,IER3,IGF2R,INTS1,ISLR2,JAZF1,JPT1,KCNQ3,KLHL29,MAPT,MKI67,NELL2,NMI,NOX5,NTRK1,PHF11,POU2F1,PSMC3,PTGER4,PTPRE,RCAN3,RPA3,RPTOR,SH2D2A,STX12,TBXAS1,TMCC1,TMEFF2,UBE4A,VAMP5,WWOX,ZNF366	50 (41)	37
FOXO4		transcription regulator	26s Proteasome,Akt,CCND1,CDKN1A,CDKN1B,Creb,EGFR,EZH2,FOXO4,IRF3,JUN,MAPK1,MAPK9,MTOR,MYC,NFAT5,NFE2L2,PPARG,PPARGC1A,SIRT1,SP1,SREBF1,STAT5a/b,TCF,TP53,TSC2	3		0.603	0.00326	0.0153	AHI1,ANXA6,ATP5MC1,CAD,CDC42EP3,CERS6,CSMD3,DBP,GABRA1,HDGFL3,HECW2,HNRNPU,IER3,IGF2R,INTS1,ISLR2,JPT1,KCNQ3,LAMP1,LEF1,LEMD3,LRCH1,MAPT,mir-128,NMI,NOX5,NRSN1,PHF11,PSMC3,PSMD8,PTPRU,RCAN3,RPA3,RPL7,RPTOR,RTN2,S100A13,STX12,TBXAS1,TMCC1,TMEFF2,TRAP1,VAMP5,WWOX	44 (26)	24
CERS2		transcription regulator	APP,AR,CERS2,FOXO1,IKBKB,Jnk,JUN,MAP2K4,MAPK14,MTOR,MYC,NFE2L2,NFkB (complex),PLA2G4A,RICTOR,Smad2/3,SP1,STAT3,STAT6,TP53,UGCG,YAP1	3		-0.152	0.00325	0.0085	ANXA6,ATP5MC1,CAD,CDC42EP3,CDK5RAP3,CERS6,CLEC4E,COBL,COPG2,COX7A2L,CSMD3,DBP,DLST,GABRA1,GPR63,HNRNPU,ILDR2,ISLR2,KCNQ3,LEMD3,MAPT,mir-128,MKI67,MRC2,MYO1D,NOX5,NRSN1,PHF11,PITRM1,PSMC3,PSMD8,PTPRU,PXN,RTN2,S100A13,SLC12A2,STX12,TMCC1,TMEM131,TRAP1,WIF1,ZEB2,ZNF608	43 (22)	20
CCND2		other	26s Proteasome,AKT2,CCND1,CCND2,CEBPB,Creb,EGFR,EIF4E,FOXO1,GSK3B,IKK (complex),Jnk,MAP2K7,MAPK1,MAPK12,MAPK14,MTOR,NCF1,P38 MAPK,RB1,SP1,TP53,TSC2	3		-1.897	0.00323	0.012	AHI1,ANXA6,ATP5MC1,CAD,CD82,CDK5RAP3,CERS6,CHCHD3,CSMD3,DLST,GHITM,GPR63,HYAL3,INTS1,ISLR2,JPT1,KCNQ3,LAMP1,LEF1,MAP2K4,MAPT,mir-128,MRC2,NMI,NOX5,PHF11,PSMC3,PSMD8,PTPRU,RAD51C,RCAN3,RPA3,RPL7,STX12,TMCC1,TRAP1,UBE4A,WIF1,WWOX,ZEB2	40 (23)	20
IL36A		cytokine	AR,CEBPA,CEBPB,Creb,CREB1,CTNNB1,EGFR,EIF4E,ERK1/2,FOXO1,GATA1,Hsp27,HSPB1,IKBKB,IKK (complex),IL36A,Jnk,MAP2K7,MAPK14,MED1,MITF,MKNK1,MTOR,NFAT5,NFE2L2,NFkB (complex),P38 MAPK,PLA2G4A,PPARG,PPARGC1A,PRKAA1,PRKCD,RB1,RELA,RICTOR,Smad2/3,SP1,STAT3,STAT6,TP53	3		-1.483	0.00317	0.0233	ANXA6,AP3M2,ATP5MC1,CAD,CD82,CDK5RAP3,CERS6,CHCHD3,CLEC4E,COPG2,COX7A2L,CSMD3,DBP,DLST,GABRA1,GHITM,HECW2,IER3,ILDR2,INTS1,ISLR2,JAZF1,JPT1,KCNQ3,KLHL29,LAMP1,LEMD3,MAP2K4,mir-128,MRC2,MYO1D,NELL2,NOX5,NRSN1,NTRK1,PHF11,PITRM1,PSMC3,PSMD8,PTGER4,PTPRE,PXN,RAD51C,RPA3,S100A13,STX12,TBXAS1,TMCC1,TMEM131,TRAP1,UBE4A,VAMP5,WIF1,ZNF366,ZNF608	55 (40)	38
LAMTOR2		other	Akt,CDKN1B,Creb,DUSP1,EGFR,EIF4E,ESR1,EZH2,FOXO1,HSF1,IRF3,Jnk,JUN,LAMTOR2,LIN28A,MAPK1,MAPK3,MTOR,MYC,NFAT5,NFE2L2,NFkB (complex),PARP1,RARA,RB1,RELA,RICTOR,RPS6KB1,SIRT1,SP1,STAT3,TFEB,TP53	3		-0.42	0.00313	0.0167	ANXA6,AP3M2,ATP5MC1,CAD,CDK5RAP3,CERS6,CHCHD3,CLEC4E,COBL,COPG2,COX7A2L,CSMD3,DBP,DLST,FAM186A,FUS,GABRA1,GHITM,HDGFL3,HECW2,IGF2R,INTS1,ISLR2,KCNQ3,LAMP1,LRCH1,MAPT,MKI67,MRC2,NELL2,NMI,NOX5,NRSN1,NTRK1,PHF11,POU2F1,PSMD8,PTGER4,PTPRU,PXN,RCAN3,RPTOR,RTN2,S100A13,SH2D2A,SLC12A2,STX12,TMCC1,TMEFF2,TRAP1,UBE4A	51 (33)	29
FGF9		growth factor	Creb,DUSP1,EGFR,EIF3A,ESR1,FGF9,FGFR1,FOXO3,HSF1,Jnk,LIN28A,Mapk,MAPK1,MAPK14,MAPK3,MTOR,MYC,NFE2L2,NFkB (complex),NR3C1,PARP1,RARA,RICTOR,RPS6KB1,SIRT1,STAT3,TFEB,TP53	3		0	0.00313	0.0114	ANXA6,ATP5MC1,CAD,CDC42EP3,CERS6,CLEC4E,COBL,COPG2,COX7A2L,CSMD3,DBP,DLST,FAM186A,FUS,GABRA1,GPR63,HNRNPU,INTS1,ISLR2,LAMP1,LEF1,LEMD3,LRCH1,MAPT,MKI67,MRC2,NELL2,NMI,NOX5,NRSN1,NTRK1,PHF11,POU2F1,PSMD8,PTPRU,PXN,RCAN3,RPA3,RTN2,S100A13,SH2D2A,SLC12A2,STX12,TMCC1,TRAP1,WIF1	46 (28)	24
PDCD1		phosphatase	Akt,AR,ARHGEF7,CDK9,CDKN1B,CEBPA,Creb,EGFR,EP300,ESR1,estrogen receptor,EZH2,FOXO1,FOXO3,FYN,IGF1R,IKBKB,IKK (complex),IRF3,JUN,LAT,MAPK1,MTOR,NFAT5,NFE2L2,NFkB (complex),PAK2,PDCD1,PPARGC1A,PRKAA2,PRKCD,PTPN11,RELA,SP1,STAT3,STAT5a/b,TP53,TSC2	3		-0.143	0.00312	0.0167	ANXA6,AP3M2,ATP5MC1,CAD,CDK5RAP3,CERS6,CLEC4E,COPG2,CSMD3,DBP,FAM186A,GABRA1,HDGFL3,HECW2,HNRNPU,IER3,ILDR2,INTS1,ISLR2,KCNQ3,KLHL29,LAMP1,LEMD3,MAPT,mir-128,MKI67,MYO1D,NOX5,NRSN1,NTRK1,PITRM1,PSMC3,PSMD8,PTGER4,PTPRU,PXN,RAD51C,RCAN3,RPA3,RPL7,RPTOR,S100A13,SMAD9,STX12,TBXAS1,TMCC1,TMEFF2,TRAP1,ZEB2	49 (38)	33
AHSA1		other	AHSA1,CEBPA,CEBPB,Creb,CTNNB1,EIF4E,ERK1/2,FOXO1,GATA1,IKBKB,JUN,MAP2K1/2,MAPK1,MED1,MKNK1,MTOR,NFkB (complex),P38 MAPK,Pkc(s),PRKAA1,RAF1,RARA,RB1,RELA,SP1,STAT3	3		0.781	0.00307	0.0086	AP3M2,CD82,CDK5RAP3,CHCHD3,CLEC4E,COBL,COPG2,DBP,DLST,FAM186A,GHITM,GPR63,HECW2,HNRNPU,IGF2R,INTS1,ISLR2,JAZF1,JPT1,KCNQ3,KLHL29,LEF1,MAPT,MKI67,MYO1D,NELL2,NMI,NOX5,NTRK1,PHF11,PTGER4,PTPRE,PXN,RCAN3,RPA3,STX12,TBXAS1,TMCC1,UBE4A,WIF1,ZNF366	41 (26)	23
TRAF2		enzyme	CASP4,CDKN1B,CEBPB,Creb,EIF4E,ERBB2,FOXO1,Hsp27,IFNB1,IKBKB,IKK (complex),IL1B,Jnk,MAP2K1,MAP3K5,Map3k7,MAP3K8,MAPK1,MAPK14,MAPK8,MITF,MKNK1,MTOR,NCF1,NFAT5,NFE2L2,NFkB (complex),NFKB2,NFKBIA,P38 MAPK,PPARG,PPARGC1A,PRKAA1,PRKAA2,RB1,RELA,RICTOR,SIRT1,SP1,SREBF1,STAT3,STAT5a/b,STAT6,STK11,TICAM1,TNF,TRAF2	3		-1.857	0.00304	0.0191	AP3M2,ARHGEF10L,CD82,CDC14B,CDK5RAP3,CHCHD3,CLEC4E,COBL,COPG2,COX7A2L,DBP,GABRA1,GHITM,HECW2,HYAL3,IER3,INTS1,ISLR2,JPT1,KCNQ3,KLHL29,LAMP1,LEF1,LEMD3,LRCH1,MAP2K4,MKI67,MRC2,MYO1D,NEAT1,NELL2,NRSN1,NTRK1,PLPP1,POU2F1,PSMC3,RAD51C,RCAN3,RPA3,S100A13,SIDT1,STX12,TMCC1,TMEFF2,TMEM131,UBE4A,VAMP5,WIF1,ZNF608	49 (47)	37
SH3BP5		other	APP,AR,FOXO1,IKBKB,Jnk,JUN,MAP2K4,MAPK14,MTOR,MYC,NFE2L2,NFkB (complex),PLA2G4A,RICTOR,SH3BP5,Smad2/3,SP1,STAT3,STAT6,TP53,YAP1	3		0.152	0.00297	0.0078	ANXA6,ATP5MC1,CAD,CDC42EP3,CDK5RAP3,CERS6,CLEC4E,COBL,COPG2,COX7A2L,CSMD3,DBP,DLST,GABRA1,GPR63,HNRNPU,ILDR2,ISLR2,KCNQ3,LEMD3,MAPT,mir-128,MKI67,MRC2,MYO1D,NOX5,NRSN1,PHF11,PITRM1,PSMC3,PSMD8,PTPRU,PXN,RTN2,S100A13,SLC12A2,STX12,TMCC1,TMEM131,TRAP1,WIF1,ZEB2,ZNF608	43 (21)	19
TGFA		growth factor	CCND1,CDH1,CEBPA,CEBPB,Creb,CREB1,CTNNB1,EGFR,EIF4E,ERBB2,ERK1/2,ESR1,FMR1,FOXO1,FYN,GATA1,IKBKB,IRF3,ITGB1,JUN,LYN,Mapk,MAPK1,MAPK14,MED1,MET,MKNK1,MTOR,MXD1,NFkB (complex),NOS2,PARP1,PI3K (family),PRKAA1,RELA,RICTOR,RPS6KB1,RXRA,SP1,SRC,STAT3,STAT5A,STAT5B,SYK,TGFA,TP53,YES1	3		0	0.00296	0.0207	AHI1,ANKS1B,ANXA6,AP3M2,CAD,CDC14B,CDC42EP3,CDK5RAP3,CERS6,CLEC4E,COBL,COPG2,COX7A2L,CSMD3,DBP,DIP2B,FAM186A,HECW2,HNRNPU,INTS1,ISLR2,JAZF1,JPT1,KCNQ3,KLHL29,KLHL31,LAMP1,LEF1,MAPT,mir-128,MKI67,MYO1D,NELL2,NTRK1,POU2F1,PSMC3,PTGER4,PTPRE,PTPRU,PXN,RCAN3,RPL7,RPTOR,SFXN1,SIDT1,STX12,TBXAS1,TMCC1,TRAP1,UBE4A,WIF1,WWOX,ZEB2,ZNF366	54 (47)	41
CLEC11A		growth factor	CEBPA,CLEC11A,Creb,EGFR,estrogen receptor,Gsk3,IGF1R,IKBKB,IKK (complex),MTOR,NFE2L2,NFkB (complex),PRKCD,RELA,STAT3,TFEB,TP53	3		1.265	0.00294	0.0056	ANXA6,AP3M2,ATP5MC1,CAD,CD82,CDC42EP3,CERS6,CLEC4E,COBL,COPG2,CSMD3,DBP,DLST,GABRA1,GPR63,IER3,IGF2R,INTS1,ISLR2,LAMP1,LEF1,MAPT,mir-128,MKI67,MYO1D,NRSN1,PSMC3,PSMD8,PTGER4,PTPRU,PXN,RAD51C,RPL7,S100A13,SLC12A2,STX12,TBXAS1,TMCC1,TRAP1,ZEB2	40 (17)	16
WNT3		other	CCND1,CEBPA,CEBPB,Creb,CREB1,CTNNB1,EGFR,EIF4E,ERK1/2,GATA1,JUN,Mapk,MAPK7,MED1,MEF2C,MEF2D,MKNK1,MTOR,NFkB (complex),PPARG,PRKAA1,RB1,RELA,RXRA,SP1,STAT3,STAT5a/b,WNT3	3		-0.949	0.00294	0.0063	AHI1,AP3M2,BLK,CAD,CHCHD3,CLEC4E,COBL,COPG2,DBP,DLST,GHITM,GPR63,HECW2,HNRNPU,IGF2R,INTS1,ISLR2,JAZF1,JPT1,KCNQ3,KLHL29,LEF1,LEMD3,MAPT,MKI67,NELL2,NOX5,NTRK1,PTGER4,PTPRE,PXN,RPA3,STX12,TBXAS1,TMCC1,UBE4A,VAMP5,WIF1,WWOX,ZNF366	40 (28)	26
BNIP3L		other	APP,AR,BNIP3L,FOXO1,GATA1,IKBKB,Jnk,JUN,MTOR,NFE2,NFE2L2,NFkB (complex),PLA2G4A,RICTOR,Smad2/3,SP1,STAT6,TCF,TP53,YAP1	3		0.457	0.00291	0.0094	ANXA6,ATP5MC1,CDC42EP3,CDK5RAP3,CERS6,CLEC4E,COX7A2L,CSMD3,DBP,DLST,GABRA1,GPR63,HNRNPU,IGF2R,ILDR2,ISLR2,JAZF1,KCNQ3,LEF1,LEMD3,MAPT,mir-128,MKI67,MRC2,MYO1D,NOX5,NRSN1,PHF11,PITRM1,PSMC3,PSMD8,PTPRU,PXN,S100A13,SLC12A2,STX12,TBXAS1,TMCC1,TMEM131,TRAP1,ZEB2,ZNF366,ZNF608	43 (20)	19
ETV6-FGFR3		fusion gene/product	Akt,CDKN1B,CEBPA,CEBPB,Creb,DUSP1,EGFR,EIF4E,EP300,ETV6-FGFR3,EZH2,FOXO1,Hsp27,IKBKB,IRF3,JUN,KAT5,LIN28A,Mapk,MAPK1,MAPK3,MITF,MKNK1,MTOR,NFAT5,NFE2L2,NFkB (complex),P38 MAPK,PARP1,PPARG,PPARGC1A,RARA,RB1,RELA,SP1,STAT3,STAT5a/b,TP53,TSC2	3		-0.816	0.00288	0.0143	ANXA6,AP3M2,ATP5MC1,CAD,CD82,CDK5RAP3,CERS6,CHCHD3,CLEC4E,COBL,COPG2,CSMD3,DBP,DLST,FAM186A,FUS,GABRA1,GHITM,HDGFL3,HECW2,HNRNPU,IER3,IGF2R,INTS1,ISLR2,JPT1,KCNQ3,MAPT,mir-128,MKI67,MYO1D,NELL2,NMI,NOX5,NRSN1,NTRK1,PHF11,POU2F1,PSMC3,PSMD8,PTGER4,RCAN3,RPA3,RPL7,RPTOR,S100A13,SH2D2A,STX12,TBXAS1,TMCC1,TMEFF2,TRAP1,UBE4A,VAMP5	54 (39)	36
TNFRSF17		transmembrane receptor	AR,CEBPA,CEBPB,Creb,CREB1,EGFR,EIF4E,FOXO1,Hsp27,IKBKB,IKK (complex),INSR,IRF3,Jnk,JUN,MAPK8,MET,MITF,MKNK1,MTOR,NFAT5,NFATC2,NFE2L2,NFkB (complex),P38 MAPK,PLA2G4A,PPARG,PPARGC1A,RB1,RELA,RICTOR,SIRT1,Smad2/3,SP1,STAT3,STAT6,TCF,TNFRSF17,TP53	3		-1.361	0.00288	0.0195	ANXA6,AP3M2,ATP5MC1,CAD,CD82,CDK5RAP3,CERS6,CHCHD3,CLEC4E,COBL,COPG2,COX7A2L,CSMD3,DBP,DLST,GABRA1,GHITM,HECW2,HNRNPU,IER3,ILDR2,INTS1,ISLR2,JPT1,KCNQ3,LEF1,LEMD3,LRCH1,mir-128,MRC2,MYO1D,NELL2,NMI,NOX5,NRSN1,NTRK1,PHF11,PITRM1,PSMC3,PSMD8,PTGER4,PXN,RAD51C,RPA3,RPTOR,S100A13,STX12,TBXAS1,TMCC1,TMEM131,TRAP1,UBE4A,VAMP5,ZNF608	54 (39)	37
RANBP2		enzyme	APP,AR,FOXO1,IKBKB,Jnk,JUN,MAP2K7,MAPK14,MTOR,NFE2L2,NFkB (complex),PLA2G4A,RANBP2,RICTOR,Smad2/3,SP1,STAT6,TCF,TP53,YAP1	3		-0.156	0.00287	0.0087	ANXA6,ATP5MC1,CDC42EP3,CDK5RAP3,CERS6,CLEC4E,COX7A2L,CSMD3,DBP,DLST,GABRA1,GPR63,HNRNPU,ILDR2,ISLR2,KCNQ3,LEF1,LEMD3,MAP2K4,MAPT,mir-128,MKI67,MRC2,MYO1D,NOX5,NRSN1,PHF11,PITRM1,PSMC3,PSMD8,PTPRU,PXN,S100A13,SLC12A2,STX12,TMCC1,TMEM131,TRAP1,WIF1,ZEB2,ZNF608	41 (20)	19
NDRG1		kinase	Calcineurin protein(s),CTNNB1,EGFR,EIF2AK3,ERK1/2,ERN1,GLI1,Jnk,MAPK1,MET,MTOR,NDRG1,NFkB (complex),PARP1,SMAD3,STK11	3		0.73	0.00283	0.0028	ANXA6,ATP5MC1,CAD,CAPRIN2,CD82,CLEC4E,DBP,HNRNPU,IER3,ISLR2,KCNQ3,KLHL29,KLK1,LEF1,MAPT,MKI67,MRC2,NELL2,NMI,NOX5,PHF11,POU2F1,PTPRE,RCAN3,SLC12A2,STX12,TMCC1,USP48,WIF1,ZEB2	30 (16)	14
RASSF1		other	APP,AR,CEBPA,CEBPB,Creb,CTNNB1,DUSP1,EGFR,ERK1/2,FOXO1,FOXO3,GATA1,IKBKB,Jnk,JUN,LIN28A,MAPK1,MAPK14,MAPK3,MED1,MTOR,NFAT5,PARP1,PRKAA1,RAC1,RARA,RASSF1,RELA,RICTOR,SP1,STAT3,STAT6,STK4,TCF	3		1.093	0.00282	0.0118	AP3M2,CAD,CDK5RAP3,COBL,COPG2,COX7A2L,FAM186A,FUS,HECW2,HNRNPU,ILDR2,INTS1,ISLR2,JAZF1,JPT1,KCNQ3,KLHL29,LEF1,LEMD3,MAPT,MKI67,MRC2,MYO1D,NELL2,NMI,NOX5,NTRK1,PHF11,PITRM1,POU2F1,PTGER4,PTPRE,RCAN3,RPA3,SH2D2A,STX12,TBXAS1,TMCC1,TMEM131,ZNF366,ZNF608	41 (34)	30
CD27		transmembrane receptor	APP,AR,CD27,CTNNB1,FOXO1,IKBKB,JINK1/2,Jnk,JUN,MTOR,NFE2L2,NFkB (complex),PARP1,PLA2G4A,RICTOR,Smad2/3,SP1,STAT6,TCF,TP53,YAP1	3		0	0.00278	0.0087	ANXA6,ATP5MC1,CDC42EP3,CDK5RAP3,CERS6,CLEC4E,COX7A2L,CSMD3,DBP,DLST,GABRA1,GPR63,HNRNPU,ILDR2,ISLR2,KCNQ3,LEF1,LEMD3,MAPT,mir-128,MKI67,MRC2,MYO1D,NELL2,NOX5,NRSN1,PHF11,PITRM1,POU2F1,PSMC3,PSMD8,PTPRU,PXN,S100A13,SLC12A2,STX12,TMCC1,TMEM131,TRAP1,WIF1,ZEB2,ZNF608	42 (21)	19
VGF		growth factor	Akt,CDKN1B,DUSP1,EGFR,EP300,EZH2,FOXO1,FOXO3,IRF3,Jnk,JUN,LIN28A,MAPK1,MTOR,NFAT5,NFkB (complex),PARP1,PPARGC1A,RARA,RB1,RELA,SP1,STAT3,TSC2,VGF	3		-0.16	0.00278	0.0054	AP3M2,CAD,CDK5RAP3,CHCHD3,CLEC4E,COBL,COPG2,DBP,DLST,FAM186A,FUS,GHITM,GPR63,HDGFL3,HECW2,HNRNPU,IGF2R,ISLR2,KCNQ3,LEMD3,MAPT,MKI67,MRC2,NELL2,NMI,NOX5,NTRK1,PHF11,POU2F1,PSMC3,PTGER4,PXN,RCAN3,RPA3,RPTOR,SH2D2A,STX12,TMCC1,TMEFF2	39 (25)	23
NMUR2		G-protein coupled receptor	ADCY,CCND1,CEBPB,DUSP1,EIF4E,ERK,ERK1/2,GSK3B,MTOR,NFkB (complex),NMUR2,NOS2,Notch,PLA2G4A,PLC,PPARG,RELA,RXRA,STAT3,STAT5a/b,STK11	3		1.257	0.00275	0.0028	AHI1,AP3M2,ATP5MC1,CD82,CDC42EP3,CLEC4E,COBL,COPG2,DBP,ISLR2,JPT1,KLHL29,LEF1,LEMD3,MAPT,MKI67,NOX5,NTRK1,PTGER4,PTPRE,PXN,RPA3,SFXN1,SH2D2A,STX12,TBXAS1,TMCC1,UBE4A,VAMP5,WWOX,ZEB2	31 (21)	17
CD180		other	AR,CD180,CEBPA,EGFR,FOXO1,HSF1,IKBKB,IKK (complex),INSR,IRF3,Jnk,JUN,MAPK8,MAPK9,MTOR,NFE2L2,NFkB (complex),PLA2G4A,PRKCD,RELA,RICTOR,SIRT1,Smad2/3,SP1,STAT3,STAT6,TCF,TP53,YAP1	3		-0.429	0.00275	0.0116	ANXA6,AP3M2,ATP5MC1,CAD,CDC42EP3,CDK5RAP3,CERS6,CLEC4E,COBL,COPG2,COX7A2L,CSMD3,DBP,DLST,GABRA1,GPR63,HNRNPU,IER3,ILDR2,ISLR2,KCNQ3,LAMP1,LEF1,LEMD3,LRCH1,mir-128,MKI67,MRC2,MYO1D,NMI,NOX5,NRSN1,PHF11,PITRM1,PSMC3,PSMD8,PTGER4,PTPRU,PXN,RAD51C,RPTOR,S100A13,SLC12A2,STX12,TBXAS1,TMCC1,TMEM131,TRAP1,ZNF608	49 (29)	27
EREG		growth factor	Akt,Cdc42,CDKN1B,Creb,CREB1,EGFR,EP300,EREG,EZH2,FOXO1,FOXO3,IRF3,Jnk,JUN,Mapk,MAPK1,MTOR,NFAT5,NFkB (complex),PARP1,PI3K (family),PPARGC1A,RB1,RELA,SP1,STAT3,STAT6,TSC2	3		-0.316	0.00272	0.0054	AP3M2,CAD,CDC42EP3,CDK5RAP3,CHCHD3,CLEC4E,COBL,COPG2,DBP,DLST,GHITM,GPR63,HDGFL3,HECW2,HNRNPU,IGF2R,INTS1,ISLR2,KCNQ3,LAMP1,LEMD3,MAPT,MKI67,MRC2,NELL2,NMI,POU2F1,PSMC3,PTGER4,PTPRE,PXN,RCAN3,RPA3,RPTOR,STX12,TMCC1,TMEFF2,TMEM131,ZEB2,ZNF608	40 (28)	26
DGKD		kinase	Akt,Cdc42,CDKN1B,Creb,CREB1,DGKD,EGFR,EP300,EZH2,FOXO1,FOXO3,IRF3,Jnk,JUN,Mapk,MAPK1,MTOR,NFAT5,NFkB (complex),PARP1,PI3K (family),PPARGC1A,RB1,RELA,SP1,STAT3,STAT6,TSC2	3		-0.316	0.00272	0.0055	AP3M2,CAD,CDC42EP3,CDK5RAP3,CHCHD3,CLEC4E,COBL,COPG2,DBP,DLST,GHITM,GPR63,HDGFL3,HECW2,HNRNPU,IGF2R,INTS1,ISLR2,KCNQ3,LAMP1,LEMD3,MAPT,MKI67,MRC2,NELL2,NMI,POU2F1,PSMC3,PTGER4,PTPRE,PXN,RCAN3,RPA3,RPTOR,STX12,TMCC1,TMEFF2,TMEM131,ZEB2,ZNF608	40 (28)	26
LINGO1		other	Akt,Cdc42,CDKN1B,Creb,CREB1,EGFR,EP300,EZH2,FOXO1,FOXO3,IRF3,Jnk,JUN,LINGO1,Mapk,MAPK1,MTOR,NFAT5,NFkB (complex),PARP1,PI3K (family),PPARGC1A,RB1,RELA,SP1,STAT3,STAT6,TSC2	3		0.316	0.0027	0.0055	AP3M2,CAD,CDC42EP3,CDK5RAP3,CHCHD3,CLEC4E,COBL,COPG2,DBP,DLST,GHITM,GPR63,HDGFL3,HECW2,HNRNPU,IGF2R,INTS1,ISLR2,KCNQ3,LAMP1,LEMD3,MAPT,MKI67,MRC2,NELL2,NMI,POU2F1,PSMC3,PTGER4,PTPRE,PXN,RCAN3,RPA3,RPTOR,STX12,TMCC1,TMEFF2,TMEM131,ZEB2,ZNF608	40 (28)	26
CHRM2		G-protein coupled receptor	ADCY,CEBPB,CHRM2,EGFR,ERK1/2,IKK (complex),Jnk,JUN,MAP2K7,MAPK14,MTOR,P38 MAPK,RB1,RELA,SP1,STAT3,STAT5a/b,STK11,TP53,TSC2	3		-0.649	0.00268	0.0083	ANXA6,AP3M2,ATP5MC1,CAD,CD82,CDC42EP3,CERS6,CHCHD3,COBL,COPG2,CSMD3,DLST,GHITM,HNRNPU,IGF2R,ISLR2,JPT1,KCNQ3,KLHL29,LEF1,LEMD3,MAP2K4,MAPT,mir-128,MRC2,NOX5,PSMC3,PSMD8,PTGER4,PTPRE,PTPRU,RAD51C,RPA3,RPL7,STX12,TMCC1,TRAP1,WIF1	38 (20)	18
MGAT3		enzyme	APP,AR,CEBPA,CEBPB,Creb,CREB1,EGFR,ERK1/2,ESR1,FOXO1,GATA1,IKBKB,IKK (complex),Jnk,JUN,MAPK1,MED1,MGAT3,MTOR,NFkB (complex),PLA2G4A,PRKAA1,PRKCD,RB1,RELA,RICTOR,Smad2/3,SP1,STAT3,STAT6,TP53	3		0.577	0.00266	0.0171	ANXA6,AP3M2,ATP5MC1,CAD,CDK5RAP3,CERS6,CHCHD3,CLEC4E,COPG2,COX7A2L,CSMD3,DBP,FAM186A,GHITM,GPR63,HECW2,HNRNPU,ILDR2,INTS1,ISLR2,JAZF1,JPT1,KCNQ3,KLHL29,LAMP1,LEMD3,MAPT,mir-128,MRC2,MYO1D,NOX5,NTRK1,PITRM1,PSMD8,PTGER4,PTPRE,PTPRU,PXN,RAD51C,RCAN3,RPA3,STX12,TBXAS1,TMCC1,TMEM131,TRAP1,ZNF366,ZNF608	48 (31)	30
ATP1A1		transporter	Akt,APP,ATP1A1,CDKN1B,CEBPA,CEBPB,Creb,EGFR,EP300,ERBB2,ERK1/2,ESR1,estrogen receptor,EZH2,FOXO1,GATA1,IKBKB,IKK (complex),IRF3,Jnk,MED1,MTOR,NFAT5,NFkB (complex),PPARGC1A,PRKAA1,RB1,RELA,SP1,SRC (family),STAT3,STAT5a/b,STAT6,TLR3,TP53,TSC2	3		1.664	0.00265	0.012	ANXA6,AP3M2,ATP5MC1,CAD,CDC14B,CDK5RAP3,CERS6,CHCHD3,CLEC4E,COBL,COPG2,CSMD3,DBP,DLST,FAM186A,GHITM,GLRX3,HDGFL3,HECW2,IER3,INTS1,ISLR2,JAZF1,JPT1,KCNQ3,KLHL29,LAMP1,MAPT,mir-128,MRC2,MYO1D,NOX5,NTRK1,PHF11,PSMC3,PSMD8,PTGER4,PTPRE,PTPRU,PXN,RAD51C,RPA3,RPL7,RPTOR,STX12,TBXAS1,TMCC1,TMEFF2,TMEM131,TRAP1,ZNF366,ZNF608	52 (36)	33
TCF7L1		transcription regulator	Akt,CDKN1B,Creb,ELAVL1,EP300,EZH2,FOXO1,FOXO3,HMGA1,IRF3,Jnk,JUN,MTOR,MYC,NCL,NFAT5,NFkB (complex),PI3K (family),PPARGC1A,RB1,RELA,SP1,SREBF1,STAT3,STAT5a/b,SYK,TCF7L1,TP53,TSC2	3		-0.603	0.00263	0.0084	ANXA6,AP3M2,ATP5MC1,CAD,CDC42EP3,CDK5RAP3,CERS6,CHCHD3,CLEC4E,COBL,COPG2,CSMD3,GHITM,GPR63,HDGFL3,HECW2,IGF2R,INTS1,ISLR2,KCNQ3,KLHL31,LEMD3,MAPT,mir-128,MKI67,MRC2,NOX5,PHF11,PSMC3,PSMD8,PTGER4,PTPRN2,PTPRU,PXN,RPA3,RPTOR,RTN2,S100A13,SFXN1,STX12,TMCC1,TMEFF2,TRAP1,UBE4A	44 (29)	27
ID1		transcription regulator	CCND1,Cdc42,CDK2,CDKN1B,CEBPB,CREB1,EGFR,ERK1/2,FOXO1,FOXO3,GATA1,ID1,IKBKB,IKK (complex),Jnk,MAPK1,MED1,MTOR,MYC,NFkB (complex),PARP1,PRKAA1,RB1,SMARCA4,STAT6,TP53	3		0.295	0.00263	0.0123	AHI1,ANXA6,ATP5MC1,CAD,CDK5RAP3,CERS6,CHCHD3,CLEC4E,CSMD3,DBP,DLST,GHITM,GPR63,HECW2,IER3,ISLR2,JAZF1,KLHL29,LAMP1,LEMD3,MELTF,mir-128,MRC2,MYO1D,NELL2,NMI,NOX5,PHF11,POU2F1,PSMD8,PTPRU,PXN,RAD51C,RCAN3,RPA3,RPL7,RTN2,STX12,TMCC1,TMEFF2,TMEM131,TRAP1,WWOX,ZEB2,ZNF366,ZNF608	46 (26)	23
CRHR1		G-protein coupled receptor	CEBPB,CRHR1,CTNNB1,DUSP1,EGFR,ERK1/2,FAAH,GATA1,JUN,LIN28A,MAPK1,MAPK14,MAPK3,MED1,MTOR,NFE2L2,NFkB (complex),PARP1,PPARG,PRKAA1,RARA,RELA,SP1,STAT3	3		0.781	0.00261	0.0069	AP3M2,CAD,CLEC4E,COBL,COPG2,DBP,FAM186A,FUS,GABRA1,HECW2,HNRNPU,IGF2R,ISLR2,JAZF1,JPT1,KCNQ3,KLHL29,LEF1,LEMD3,MAPT,MKI67,NELL2,NMI,NOX5,NRSN1,NTRK1,PHF11,POU2F1,PSMC3,PTGER4,PTPRE,PXN,RCAN3,RPA3,RPL7,S100A13,SH2D2A,STX12,TMCC1,VAMP5,ZNF366	41 (24)	22
Lpa receptor		group	CEBPA,CEBPB,Creb,CTNNB1,EGFR,ERK1/2,ERN1,FYN,GATA1,IKBKB,ITGB1,Jnk,JUN,Lpa receptor,MED1,MTOR,NFkB (complex),NOS2,PRKAA1,PRKCD,RELA,RHOA,SP1,STAT3,TP53	3		-0.152	0.00261	0.0075	ANXA6,AP3M2,ATP5MC1,CAD,CERS6,CLEC4E,COBL,COPG2,CSMD3,DLST,GPR63,HECW2,HNRNPU,IGF2R,INTS1,ISLR2,JAZF1,JPT1,KCNQ3,KLHL29,LAMP1,LEF1,LEMD3,MAPT,mir-128,MKI67,MRC2,MYO1D,PSMD8,PTGER4,PTPRE,PTPRU,PXN,RPA3,RPL7,SFXN1,SIDT1,STX12,TBXAS1,TMCC1,TRAP1,WIF1,ZNF366	43 (25)	23
TFF3		other	Akt,CDKN1B,Creb,DUSP1,EGFR,EP300,ERBB2,ESR1,EZH2,FOXO1,FOXO3,IRF3,Jnk,JUN,LIN28A,Mapk,MAPK1,MAPK3,MTOR,MXD1,NFAT5,NFE2L2,NFkB (complex),PARP1,PI3K (family),PPARGC1A,RARA,RELA,SP1,STAT3,STAT6,TFF3,TSC2	3		0.729	0.0026	0.0075	AP3M2,CAD,CDC14B,CDC42EP3,CDK5RAP3,CLEC4E,COBL,COPG2,COX7A2L,DBP,FAM186A,FUS,GABRA1,HDGFL3,HECW2,HNRNPU,IGF2R,INTS1,ISLR2,KCNQ3,LAMP1,LEMD3,MAPT,MKI67,MRC2,NELL2,NMI,NOX5,NRSN1,NTRK1,PHF11,POU2F1,PSMC3,PTGER4,PTPRE,PXN,RCAN3,RPA3,RPTOR,S100A13,SH2D2A,STX12,TMCC1,TMEFF2,TMEM131,ZEB2,ZNF608	47 (33)	30
SERPINH1		other	Akt,CDKN1B,Creb,ELAVL1,EP300,EZH2,FOXO1,FOXO3,HMGA1,IRF3,Jnk,JUN,MTOR,MYC,NCL,NFAT5,NFKBIA,PI3K (family),PPARGC1A,RB1,RELA,SERPINH1,SP1,SREBF1,STAT3,STAT5a/b,SYK,TP53,TSC2	3		-0.762	0.00259	0.0075	ANXA6,AP3M2,ATP5MC1,CAD,CDC42EP3,CDK5RAP3,CERS6,CHCHD3,COBL,COPG2,CSMD3,GHITM,GPR63,HDGFL3,HECW2,IGF2R,INTS1,ISLR2,KCNQ3,KLHL31,LEMD3,MAPT,mir-128,MKI67,MRC2,NOX5,PHF11,PSMC3,PSMD8,PTGER4,PTPRN2,PTPRU,PXN,RPA3,RPTOR,RTN2,S100A13,SFXN1,STX12,TMCC1,TMEFF2,TRAP1,UBE4A	43 (29)	26
RNF4		transcription regulator	26s Proteasome,Cdc42,H2AX,MAPK1,PARP1,RELA,RNF4,TARDBP,TP53	3		-0.186	0.00256	0.0032	ANXA6,AP3M2,ATP5MC1,CD82,CDC42EP3,CERS6,CSMD3,DBP,DLST,GPR63,IER3,LAMP1,LEF1,mir-128,NELL2,NMI,NOX5,PHF11,POU2F1,PSMD8,PTGER4,PTPRE,PTPRU,PXN,RCAN3,RPL7,TBC1D1,TRAP1,ZEB2	29 (9)	7
ZMPSTE24		peptidase	ATM,CEBPA,Creb,EIF3A,EIF4E,ESR1,FOXO3,HSF1,IKBKB,IKK (complex),Jnk,JUN,MAPK1,MEF2D,MTOR,MYC,NFkB (complex),RB1,RELA,RICTOR,RPS6KB1,SIRT1,STAT3,TFEB,TP53,ZMPSTE24	3		0.885	0.00255	0.0083	ANXA6,AP3M2,ATP5MC1,BLK,CAD,CDC42EP3,CERS6,CHCHD3,CLEC4E,COBL,COPG2,COX7A2L,CSMD3,DBP,DLST,FAM186A,GHITM,HNRNPU,IER3,IGF2R,INTS1,ISLR2,LAMP1,LEMD3,LRCH1,MAPT,MRC2,MYO1D,NMI,NTRK1,PHF11,PSMC3,PSMD8,PTGER4,PTPRU,PXN,RAD51C,RCAN3,RPA3,RTN2,SLC12A2,STX12,TBXAS1,TMCC1,TRAP1,UBE4A	46 (26)	23
Growth hormone		group	Akt,AKT1,CCND1,CDKN1B,CEBPA,CEBPB,Creb,DUSP1,EIF4E,ERK1/2,ESR1,EZH2,FOXO1,GATA1,Growth hormone,Hsp27,IGF1R,IRF3,IRS1,IRS2,JAK1,JAK2,KRAS,LIN28A,Mapk,MAPK1,MAPK3,MED1,MKNK1,MTOR,MYC,NCF1,NFAT5,NFE2L2,NOS2,NRAS,PARP1,PI3K (complex),Pka,PPARGC1A,PRKAA1,RARA,RB1,RHO,ROCK,RXRA,SHC1,SP1,STAT3,STAT5a/b,STAT5B,STAT6,TSC2	3		-0.816	0.00254	0.0187	AHI1,ANKS1B,ATP5MC1,CAMK1,CDK5RAP3,CHCHD3,COBL,COPG2,DBP,DIP2B,FAM186A,FUS,GABRA1,GHITM,HDGFL3,HECW2,HYAL3,IER3,IGF2R,INTS1,ISLR2,JAZF1,JPT1,KCNQ3,KLHL29,MKI67,NELL2,NMI,NOX5,NPR3,NRSN1,NTRK1,PDC,PHF11,POU2F1,PSMC3,PTPRE,RCAN3,RPA3,RPTOR,RTN2,S100A13,SFXN1,SH2D2A,TBXAS1,TMCC1,TMEFF2,TMEM131,TRIM11,UBE4A,WWOX,ZEB2,ZNF366,ZNF608	54 (53)	42
PLEC		other	Cdc42,CDH1,CEBPA,CEBPB,Creb,CTNNB1,EGFR,EIF4E,EP300,ERK1/2,GATA1,IKBKB,ITGB1,Jnk,JUN,KAT5,Mapk,MAPK1,MED1,MET,MITF,MKNK1,MTOR,NFAT5,NFkB (complex),P38 MAPK,PAK2,PLEC,PPARG,PPARGC1A,PRKAA1,PRKCD,PTK2,RB1,RELA,RHOA,SP1,SRC,STAT3,STAT6,SYK,TP53,TSC2	3		-1.387	0.00252	0.015	ANXA6,AP3M2,CAD,CD82,CERS6,CHCHD3,CLEC4E,COBL,COPG2,CSMD3,DBP,DLST,GHITM,HECW2,HNRNPU,IER3,INTS1,ISLR2,JAZF1,JPT1,KCNQ3,KLHL29,KLHL31,LAMP1,LEF1,LEMD3,MAPT,mir-128,MRC2,MYO1D,NELL2,PHF11,PSMC3,PSMD8,PTGER4,PTPRE,RCAN3,RPA3,RPL7,RPTOR,SIDT1,SMAD9,STX12,TBXAS1,TMCC1,TMEM131,TRAP1,UBE4A,VAMP5,WIF1,ZNF366,ZNF608	52 (43)	39
ANXA1		enzyme	Akt,ANXA1,CDKN1B,CEBPA,CEBPB,Creb,DUSP1,EGFR,EIF4E,ERK1/2,EZH2,FOXO1,GATA1,Hsp27,IKBKB,IKK (complex),IRF3,Jnk,JUN,LIN28A,MAPK1,MED1,MITF,MKNK1,MPO,MTOR,NFAT5,NFkB (complex),P38 MAPK,PARP1,PLA2G4A,PLA2G6,PPARG,PPARGC1A,PRKAA1,PRKAA2,RARA,RB1,RHOA,SP1,STAT3,SYK,TP53,TSC2	3		-1.214	0.00251	0.0155	ANXA6,ATP5MC1,CAD,CD82,CDK5RAP3,CERS6,CHCHD3,CLEC4E,COBL,COPG2,CSMD3,DBP,DLST,FAM186A,FUS,GHITM,HDGFL3,HECW2,HNRNPU,IER3,IGF2R,INTS1,ISLR2,JAZF1,JPT1,KCNQ3,KLHL29,KLHL31,mir-128,MKI67,MRC2,MYO1D,NELL2,NMI,NTRK1,PHF11,POU2F1,PSMC3,PSMD8,PTPRE,PXN,RAD51C,RCAN3,RPA3,RPL7,RPTOR,SH2D2A,STX12,TBXAS1,TMCC1,TMEFF2,TRAP1,UBE4A,VAMP5,ZNF366	55 (44)	38
TRAFD1		other	CTNNB1,JINK1/2,JUN,MTOR,NFkB (complex),NFKBIA,PARP1,RELA,TP53,TRAFD1	3		-0.18	0.00249	0.0038	ANXA6,AP3M2,ATP5MC1,CD82,CDC42EP3,CERS6,CLEC4E,CSMD3,DBP,DLST,GPR63,HNRNPU,IER3,IGF2R,ISLR2,LEF1,MAPT,mir-128,MKI67,NELL2,POU2F1,PSMD8,PTGER4,PTPRE,PTPRU,RPL7,SLC12A2,STX12,TMCC1,TRAP1,WIF1	31 (10)	7
MAP3K1		kinase	AR,CEBPA,CEBPB,Creb,EGFR,FOXO1,GATA1,IKBKB,IKK (complex),INSR,IRF3,Jnk,JUN,MAP2K7,MAP3K1,MAPK14,MAPK8,MTOR,NFATC2,NFE2,NFE2L2,NFkB (complex),PLA2G4A,PLAU,RB1,RELA,RICTOR,SIRT1,Smad2/3,SP1,SREBF1,STAT6,TP53,YAP1	3		-0.832	0.00247	0.0157	ANXA6,AP3M2,ATP5MC1,CAD,CDC42EP3,CDK5RAP3,CERS6,CHCHD3,CLEC4E,COX7A2L,CSMD3,DBP,DLST,GABRA1,GHITM,HNRNPU,IER3,IGF2R,ILDR2,INTS1,ISLR2,JAZF1,JPT1,KCNQ3,LEF1,LEMD3,LRCH1,MAP2K4,mir-128,MRC2,MYO1D,NMI,NOX5,NRSN1,PHF11,PITRM1,PSMD8,PTGER4,PTPRU,PXN,RAD51C,RPA3,RPTOR,S100A13,STX12,TBXAS1,TMCC1,TMEM131,TRAP1,WIF1,ZNF366,ZNF608	52 (34)	31
LGALS8		other	26s Proteasome,CEBPA,CEBPB,CREB1,ERK1/2,ERN1,ESR1,GATA1,IKBKB,LGALS8,MAPK1,MED1,MTOR,NFkB (complex),Pka,PRKAA1,RELA,RHO,SP1,STAT3,STAT5a/b,TP53	3		-0.309	0.00246	0.009	ANXA6,AP3M2,ATP5MC1,CAD,CERS6,CLEC4E,COPG2,CSMD3,DBP,DLST,FAM186A,GPR63,HECW2,ISLR2,JAZF1,JPT1,KCNQ3,KLHL29,LAMP1,LEF1,LEMD3,MAPT,mir-128,MYO1D,NMI,NOX5,NTRK1,PDC,PHF11,PSMD8,PTGER4,PTPRE,PTPRU,PXN,RCAN3,RPA3,RPL7,STX12,TBXAS1,TMCC1,TRAP1,ZNF366	42 (22)	20
ANTXR2		transmembrane receptor	Akt,ANTXR2,CDKN1B,Creb,ELAVL1,EP300,EZH2,FOXO1,FOXO3,HMGA1,IRF3,Jnk,JUN,MTOR,MYC,NCL,NFAT5,NFkB (complex),PI3K (family),PPARGC1A,RB1,RELA,SP1,SREBF1,STAT3,STAT5a/b,SYK,TP53,TSC2	3		0.603	0.00245	0.0081	ANXA6,AP3M2,ATP5MC1,CAD,CDC42EP3,CDK5RAP3,CERS6,CHCHD3,CLEC4E,COBL,COPG2,CSMD3,GHITM,GPR63,HDGFL3,HECW2,IGF2R,INTS1,ISLR2,KCNQ3,KLHL31,LEMD3,MAPT,mir-128,MKI67,MRC2,NOX5,PHF11,PSMC3,PSMD8,PTGER4,PTPRN2,PTPRU,PXN,RPA3,RPTOR,RTN2,S100A13,SFXN1,STX12,TMCC1,TMEFF2,TRAP1,UBE4A	44 (29)	27
SGPL1		enzyme	CASP9,DUSP1,EGFR,ERK1/2,FOXO1,FOXO3,IKBKE,IRF3,LIN28A,MAPK1,MAPK14,MAPK3,MTOR,NFE2L2,NFkB (complex),PARP1,RARA,RELA,SGPL1,STAT1,STAT3,TP53	3		1.677	0.00244	0.0068	ANXA6,AP3M2,ATP5MC1,CAD,CDK5RAP3,CERS6,CLEC4E,COPG2,CSMD3,DBP,DLST,FAM186A,FUS,GABRA1,GPR63,ISLR2,LEF1,LEMD3,MAPT,mir-128,MKI67,NELL2,NMI,NOX5,NRSN1,NTRK1,POU2F1,PSMC3,PSMD8,PTGER4,PTPRE,PTPRU,PXN,RCAN3,RPL7,RPTOR,S100A13,SH2D2A,SLC12A2,STX12,TMCC1,TRAP1,WIF1	43 (22)	18
NTRK3		kinase	Akt,CCND1,CDKN1B,CEBPB,Creb,DUSP1,EIF4E,EP300,ERK,EZH2,FOXO1,IRF3,Jnk,JUN,MTOR,NFAT5,NFkB (complex),NOS2,NTRK3,PPARG,PPARGC1A,RAC1,RB1,RELA,RXRA,SP1,STAT3,TP53,TSC2	3		0.149	0.00243	0.01	AHI1,ANXA6,AP3M2,ATP5MC1,CDK5RAP3,CERS6,CHCHD3,CLEC4E,COBL,COPG2,CSMD3,GHITM,GPR63,HDGFL3,HECW2,HNRNPU,IGF2R,INTS1,ISLR2,JPT1,KCNQ3,MAPT,mir-128,MKI67,MRC2,NTRK1,PHF11,PSMC3,PSMD8,PTGER4,PTPRU,PXN,RPA3,RPL7,RPTOR,SFXN1,SH2D2A,STX12,TBXAS1,TMCC1,TMEFF2,TRAP1,UBE4A,VAMP5,WWOX	45 (29)	25
NUMBL		other	Creb,FOXO3,IKBKB,Jnk,MAPK1,MTOR,NFkB (complex),NFKB1,NFKBIA,NUMBL,RELA,TP53	3		0.522	0.00242	0.0023	ANXA6,AP3M2,ATP5MC1,CD82,CDC42EP3,CERS6,CLEC4E,CSMD3,DBP,DLST,GPR63,IER3,INTS1,ISLR2,LEF1,LEMD3,MAPT,mir-128,MKI67,MRC2,MYO1D,NMI,PHF11,PSMD8,PTPRE,PTPRU,RCAN3,RPL7,SLC12A2,STX12,TMCC1,TRAP1,ZEB2	33 (12)	9
Ccl2		cytokine	APP,AR,Ccl2,CCND1,CEBPB,Creb,CTNNB1,DUSP1,EGFR,EIF4E,ELAVL1,EP300,ERK,ERK1/2,estrogen receptor,FOXO1,GATA1,Hsp27,IKBKB,IKK (complex),Jnk,KAT5,MED1,MITF,MKNK1,MTOR,NFAT5,NFE2L2,NFkB (complex),NOS2,P38 MAPK,PPARGC1A,PRKAA1,RAC1,RB1,RELA,RICTOR,RXRA,SP1,STAT3,STAT6	3		-0.566	0.00241	0.0133	AHI1,AP3M2,CAD,CD82,CDK5RAP3,CHCHD3,CLEC4E,COBL,COPG2,COX7A2L,DBP,GABRA1,GHITM,HECW2,IER3,ILDR2,INTS1,ISLR2,JAZF1,JPT1,KCNQ3,KLHL29,LEF1,LEMD3,MAPT,MRC2,MYO1D,NELL2,NRSN1,NTRK1,PHF11,PITRM1,PSMC3,PTGER4,PTPRE,PTPRN2,PXN,RAD51C,RPA3,S100A13,SFXN1,SH2D2A,STX12,TMCC1,TMEM131,UBE4A,WIF1,WWOX,ZNF366,ZNF608	50 (41)	38
BAX		transporter	APP,AR,BAX,CASP8,CASP9,caspase,FOXO1,GATA1,IKBKB,IRF3,ITPR1,Jnk,JUN,MAP3K5,MTOR,NCF1,NFE2,NFE2L2,NFkB (complex),OGT,RELA,RICTOR,Smad2/3,SP1,SREBF1,STAT3,STAT6,TCF,TICAM1,TP53,TRAF2,YAP1	3		0.438	0.00241	0.0095	ANXA6,AP3M2,ATP5MC1,CDC42EP3,CDK5RAP3,CERS6,CLEC4E,COBL,COPG2,COX7A2L,CSMD3,DBP,DLST,GABRA1,GPR63,HNRNPU,HYAL3,IGF2R,ILDR2,ISLR2,JAZF1,KCNQ3,LEF1,LEMD3,MAPT,mir-128,MKI67,MRC2,MYO1D,NRSN1,PHF11,PITRM1,PSMC3,PSMD8,PTPRU,RPTOR,S100A13,SLC12A2,STX12,TBXAS1,TMCC1,TMEM131,TRAP1,WIF1,ZEB2,ZNF366,ZNF608	47 (32)	25
PNPLA8		enzyme	APP,AR,ATF6,EGFR,FOXO1,HSF1,IKBKB,INSR,Jnk,JUN,MAPK9,MTOR,NFE2L2,NFkB (complex),PLA2G4A,PNPLA8,PRKCD,RELA,RICTOR,Smad2/3,SP1,STAT3,STAT6,TCF,TP53,YAP1	3		-0.149	0.0024	0.0083	ANXA6,AP3M2,ATP5MC1,CAD,CDC42EP3,CDK5RAP3,CERS6,CLEC4E,COBL,COPG2,COX7A2L,CSMD3,DBP,DLST,GABRA1,GPR63,HNRNPU,ILDR2,ISLR2,KCNQ3,LAMP1,LEF1,LEMD3,MAPT,mir-128,MKI67,MRC2,MYO1D,NMI,NOX5,NRSN1,PHF11,PITRM1,PSMC3,PSMD8,PTGER4,PTPRU,PXN,S100A13,SLC12A2,STX12,TMCC1,TMEM131,TRAP1,ZNF608	45 (26)	24
JPH4		other	CaMKII,CCND1,Cdc42,CEBPB,Creb,DUSP1,EIF4E,ERK,ERK1/2,IKK (complex),JPH4,MTOR,NFkB (complex),NOS2,Notch,PLA2G4A,PPARG,RELA,RXRA,STAT3	3		1.257	0.0024	0.0024	AHI1,AP3M2,CDC42EP3,CLEC4E,COBL,COPG2,DBP,INTS1,ISLR2,JPT1,LAMP1,LEF1,LEMD3,MAPT,MKI67,NOX5,NTRK1,PTGER4,PTPRE,PXN,RAD51C,RPA3,SFXN1,SH2D2A,STX12,TBXAS1,TMCC1,UBE4A,VAMP5,WWOX,ZEB2	31 (20)	17
TRIM38		enzyme	AR,CCND1,CEBPB,Creb,CREB1,DUSP1,EGFR,EIF4E,ERK,EZH2,FOXO1,Hsp27,IKBKB,IKK (complex),IRF3,Jnk,JUN,MAP2K7,MAP3K7,MAPK14,MAPK9,MITF,MKNK1,NFAT5,NFE2L2,NFkB (complex),NOS2,P38 MAPK,PLA2G4A,PPARGC1A,RB1,RELA,RICTOR,RXRA,Smad2/3,SP1,STAT3,STAT6,TP53,TRAF6,TRIM38	3		0.412	0.00239	0.0176	AHI1,ANXA6,AP3M2,ATP5MC1,CAD,CD82,CDK5RAP3,CERS6,CHCHD3,CLEC4E,COBL,COPG2,COX7A2L,CSMD3,DBP,DLST,GABRA1,GHITM,HDGFL3,HECW2,HNRNPU,IER3,ILDR2,INTS1,JPT1,KCNQ3,LEMD3,MAP2K4,mir-128,MRC2,MYO1D,NELL2,NMI,NOX5,NRSN1,NTRK1,PHF11,PITRM1,PSMC3,PSMD8,PTGER4,PXN,RAD51C,RPA3,RPTOR,SFXN1,SH2D2A,TMEM131,TRAP1,UBE4A,WIF1,WWOX,ZNF608	53 (41)	37
miR-92a-3p (and other miRNAs w/seed AUUGCAC)		mature microRNA	APP,AR,FOXO1,GATA1,IKBKB,Jnk,JUN,miR-92a-3p (and other miRNAs w/seed AUUGCAC),MTOR,NFE2,NFE2L2,NFkB (complex),PLA2G4A,RICTOR,Smad2/3,SP1,STAT6,TCF,TP53,YAP1	3		-0.457	0.00239	0.0073	ANXA6,ATP5MC1,CDC42EP3,CDK5RAP3,CERS6,CLEC4E,COX7A2L,CSMD3,DBP,DLST,GABRA1,GPR63,HNRNPU,IGF2R,ILDR2,ISLR2,JAZF1,KCNQ3,LEF1,LEMD3,MAPT,mir-128,MKI67,MRC2,MYO1D,NOX5,NRSN1,PHF11,PITRM1,PSMC3,PSMD8,PTPRU,PXN,S100A13,SLC12A2,STX12,TBXAS1,TMCC1,TMEM131,TRAP1,ZEB2,ZNF366,ZNF608	43 (20)	19
ENO1		enzyme	Akt,CDKN1B,Creb,EIF4E,ELAVL1,ENO1,EP300,EZH2,FOXO1,FOXO3,HMGA1,IKBKB,ITGB1,Jnk,MAPK1,MET,MKNK1,MTOR,MYC,NCL,NFAT5,NFkB (complex),PARP1,PI3K (family),PPARGC1A,PRKCD,RB1,RELA,SP1,SRC,SREBF1,STAT3,STAT6,SYK,TP53,TSC2	3		-0.289	0.00238	0.0098	ANXA6,AP3M2,ATP5MC1,CDK5RAP3,CERS6,CHCHD3,CLEC4E,COBL,COPG2,CSMD3,GHITM,GPR63,HDGFL3,HECW2,INTS1,ISLR2,KCNQ3,KLHL31,LAMP1,LEF1,LEMD3,MAPT,mir-128,MKI67,MRC2,MYO1D,NELL2,POU2F1,PSMC3,PSMD8,PTGER4,PTPRN2,PTPRU,PXN,RCAN3,RPA3,RTN2,S100A13,SFXN1,SIDT1,STX12,TMCC1,TMEFF2,TMEM131,TRAP1,UBE4A,ZEB2,ZNF608	48 (36)	33
SIRPA		phosphatase	APP,AR,CCND1,CEBPB,Creb,CTNNB1,DUSP1,EGFR,EP300,ERK,estrogen receptor,FOXO1,Hsp27,IKBKB,IKK (complex),IRF3,Jnk,KAT5,MAPK1,MITF,MKNK1,MTOR,NFAT5,NFE2L2,NFkB (complex),NOS2,P38 MAPK,PLCG2,Pld,PPARGC1A,RB1,RELA,RICTOR,RXRA,SIRPA,Smad2/3,SP1,STAT3,STAT6,TP53	3		1.633	0.00237	0.0173	AHI1,ANXA6,AP3M2,ATP5MC1,CAD,CD82,CDK5RAP3,CERS6,CHCHD3,CLEC4E,COBL,COPG2,COX7A2L,CSMD3,DBP,DLST,GABRA1,GHITM,HECW2,IER3,ILDR2,INTS1,ISLR2,JPT1,KCNQ3,LEF1,LEMD3,MAPT,mir-128,MRC2,MYO1D,NELL2,NOX5,NRSN1,NTRK1,PITRM1,PSMC3,PSMD8,PTGER4,PXN,RAD51C,RCAN3,RPA3,RPTOR,S100A13,SFXN1,SH2D2A,STX12,TMCC1,TMEM131,TRAP1,WIF1,WWOX,ZNF608	54 (40)	37
DLK1		other	CEBPA,CEBPB,Creb,CTNNB1,DLK1,DUSP1,EGFR,ERK1/2,GATA1,GSK3B,JUN,LIN28A,MAPK1,MAPK14,MAPK3,MED1,MTOR,NFE2L2,PARP1,PRKAA1,RARA,RELA,SP1,STAT3	3		-0.973	0.00236	0.0055	AP3M2,CAD,CD82,COPG2,FAM186A,FUS,GABRA1,HECW2,HNRNPU,IGF2R,INTS1,ISLR2,JAZF1,JPT1,KCNQ3,KLHL29,LEMD3,MAPT,MKI67,NELL2,NMI,NOX5,NRSN1,NTRK1,PHF11,POU2F1,PSMC3,PTGER4,PTPRE,RCAN3,RPA3,S100A13,SH2D2A,STX12,TBXAS1,TMCC1,WIF1,ZNF366	38 (24)	22
SFRP1		transmembrane receptor	APP,AR,Creb,CREB1,CTNNB1,FOXO1,GATA1,IKBKB,Jnk,JUN,MTOR,NFE2,NFE2L2,NFkB (complex),Pka catalytic subunit,PLA2G4A,PPARG,RICTOR,SFRP1,Smad2/3,SP1,STAT6,TCF,TP53,YAP1	3		-0.149	0.00236	0.0088	ANXA6,ATP5MC1,CDC42EP3,CDK5RAP3,CERS6,CLEC4E,COX7A2L,CSMD3,DBP,DLST,GABRA1,GPR63,HNRNPU,IGF2R,ILDR2,INTS1,ISLR2,JAZF1,KCNQ3,LEF1,LEMD3,MAPT,mir-128,MRC2,MYO1D,NOX5,NRSN1,PHF11,PITRM1,PSMC3,PSMD8,PTPRU,PXN,S100A13,SLC12A2,STX12,TBXAS1,TMCC1,TMEM131,TRAP1,VAMP5,WIF1,ZEB2,ZNF366,ZNF608	45 (25)	23
UQCRFS1		enzyme	CCND1,CEBPB,Creb,DUSP1,EIF4E,ERK,ERK1/2,GSK3B,Jnk,MAPK14,MTOR,NFkB (complex),NOS2,Notch,PPARG,RELA,RXRA,STAT3,STAT5a/b,UQCRFS1	3		-0.539	0.00236	0.0029	AHI1,AP3M2,CD82,CDC42EP3,CLEC4E,COBL,COPG2,DBP,INTS1,ISLR2,JPT1,LEMD3,MAPT,MKI67,MRC2,NOX5,NTRK1,PTGER4,PTPRE,PXN,RPA3,SFXN1,SH2D2A,STX12,TBXAS1,TMCC1,UBE4A,VAMP5,WIF1,WWOX,ZEB2	31 (20)	18
CCKAR		G-protein coupled receptor	Akt,CCKAR,CDKN1B,Creb,ELAVL1,EP300,EZH2,FOXO1,FOXO3,HMGA1,IRF3,Jnk,JUN,MTOR,MYC,NCL,NFAT5,NFkB (complex),PI3K (family),PPARGC1A,RB1,RELA,SP1,SREBF1,STAT3,STAT5a/b,SYK,TP53,TSC2	3		-0.603	0.00236	0.008	ANXA6,AP3M2,ATP5MC1,CAD,CDC42EP3,CDK5RAP3,CERS6,CHCHD3,CLEC4E,COBL,COPG2,CSMD3,GHITM,GPR63,HDGFL3,HECW2,IGF2R,INTS1,ISLR2,KCNQ3,KLHL31,LEMD3,MAPT,mir-128,MKI67,MRC2,NOX5,PHF11,PSMC3,PSMD8,PTGER4,PTPRN2,PTPRU,PXN,RPA3,RPTOR,RTN2,S100A13,SFXN1,STX12,TMCC1,TMEFF2,TRAP1,UBE4A	44 (29)	27
TNFSF10		cytokine	Akt,AMPK,AR,CEBPA,CEBPB,Creb,DUSP1,EGFR,EIF4E,ERK1/2,ERN1,EZH2,IKBKB,IKK (complex),INSR,ITGB1,Jnk,JUN,LCK,LIN28A,MAP2K7,MAP3K7,MAPK1,MAPK3,MAPK8,MED1,MITF,MTOR,NANOG,NFAT5,NFE2,NFkB (complex),NRAS,P38 MAPK,PARP1,PPARG,PPARGC1A,PRKAA1,PRKAA2,PRKCE,RARA,RELA,RICTOR,Smad2/3,SP1,SRC,STAT3,STAT6,SYK,TAB2,TNFSF10,TP53	3		0.132	0.00233	0.0224	ANXA6,AP3M2,ATP5MC1,CAD,CD82,CERS6,CLEC4E,COBL,COPG2,COX7A2L,CSMD3,DBP,FAM186A,FUS,HDGFL3,HECW2,HNRNPU,IER3,IGF2R,ILDR2,INTS1,ISLR2,JPT1,KCNQ3,KLHL29,KLHL31,LEF1,MAP2K4,mir-128,MKI67,MRC2,MYO1D,NELL2,NMI,NOX5,NPR3,PHF11,PITRM1,POU2F1,PSMD8,PTGER4,PTPRE,PXN,RAD51C,RCAN3,RPA3,SH2D2A,SIDT1,STX12,TBXAS1,TMCC1,TMEM131,TRAP1,TRIM11,UBE4A,VAMP5,ZNF608	57 (52)	42
SLC2A2		transporter	Akt,CaMKII,Cdc42,CDKN1B,Creb,EP300,ERK1/2,EZH2,FOXO1,FOXO3,IKK (complex),IRF3,Jnk,JUN,MTOR,NFAT5,NFkB (complex),PPARG,PPARGC1A,RB1,RELA,SLC2A2,SP1,STAT3,STAT5a/b,TSC2	3		-1	0.00232	0.0038	AP3M2,CDC42EP3,CDK5RAP3,CHCHD3,CLEC4E,COBL,COPG2,DBP,DLST,GHITM,GPR63,HDGFL3,HECW2,HNRNPU,IGF2R,INTS1,ISLR2,KCNQ3,LAMP1,LEMD3,MAPT,MRC2,NOX5,PHF11,PSMC3,PTGER4,PTPRE,PXN,RAD51C,RPA3,RPTOR,STX12,TBXAS1,TMCC1,TMEFF2,VAMP5	36 (26)	23
ALOX15		enzyme	AKAP5,ALOX15,AR,CCND1,CDKN1B,CEBPB,Creb,CTNNB1,CXCR4,DUSP1,EIF4E,ERBB2,ERK,FOXO1,Hsp27,IKBKB,IKK (complex),INSR,IRF3,ITGB1,Jnk,JUN,MAP2K1,MAPK1,MAPK14,MAPK8,MITF,MKNK1,MTOR,NFAT5,NFE2L2,NOS2,NR4A1,P38 MAPK,Pkc(s),PPARGC1A,RB1,RELA,RICTOR,RXRA,SIRT1,Smad2/3,SP1,STAT3,STAT6,STK11,TP53	3		-1.457	0.00232	0.025	AHI1,ANKS1B,ANXA6,AP3M2,CD82,CDC14B,CDK5RAP3,CERS6,CHCHD3,COBL,COPG2,COX7A2L,CSMD3,DBP,DLST,GABRA1,GHITM,HECW2,HNRNPU,IER3,ILDR2,INTS1,ISLR2,JPT1,KCNQ3,KLHL29,LAMP1,LEMD3,LRCH1,mir-128,MRC2,MYO1D,NELL2,NOX5,NRSN1,NTRK1,PITRM1,PSMC3,PSMD8,PTGER4,RAD51C,RCAN3,RPA3,RPTOR,S100A13,SFXN1,SH2D2A,SIDT1,STX12,TMCC1,TMEFF2,TMEM131,TRAP1,UBE4A,WIF1,WWOX,ZNF608	57 (47)	44
BACE1		peptidase	26s Proteasome,Akt,BACE1,CDKN1B,Creb,CREB1,EP300,ERN1,ESR1,EZH2,FOXO1,FOXO3,IKBKB,IRF3,Jnk,JUN,MAPK1,MTOR,NFAT5,NFkB (complex),Pka,PPARGC1A,RB1,RELA,RHO,SP1,STAT3,TSC2	3		1.121	0.0023	0.0054	AP3M2,CAD,CDC42EP3,CDK5RAP3,CHCHD3,CLEC4E,COBL,COPG2,DBP,DLST,FAM186A,GHITM,GPR63,HDGFL3,HECW2,HNRNPU,IGF2R,INTS1,ISLR2,KCNQ3,LAMP1,LEMD3,MAPT,MKI67,MRC2,MYO1D,NMI,NOX5,NTRK1,PDC,PSMC3,PTGER4,PXN,RCAN3,RPA3,RPTOR,STX12,TMCC1,TMEFF2	39 (28)	25
ADORA3		G-protein coupled receptor	ADORA3,APP,AR,CEBPA,CEBPB,DUSP1,EIF4E,ERK1/2,FOXO1,GATA1,Gsk3,IGF1R,IKBKB,IKK (complex),Jnk,LIN28A,MAP2K1/2,MAP2K7,MAPK1,MAPK12,MAPK14,MAPK3,MED1,MKNK1,MTOR,PARP1,PRKAA1,PRKCD,RARA,RB1,RELA,RICTOR,Smad2/3,SP1,STAT6,TFEB,TP53	3		-1.54	0.0023	0.0161	ANXA6,AP3M2,ATP5MC1,CDK5RAP3,CERS6,CHCHD3,COX7A2L,CSMD3,DLST,FAM186A,FUS,GHITM,HECW2,ILDR2,ISLR2,JAZF1,JPT1,KCNQ3,KLHL29,LAMP1,LEF1,MAP2K4,MAPT,mir-128,MKI67,MRC2,MYO1D,NELL2,NMI,NOX5,NTRK1,PHF11,PITRM1,POU2F1,PSMD8,PTGER4,PTPRE,PTPRU,RAD51C,RCAN3,RPA3,SH2D2A,STX12,TBXAS1,TMCC1,TMEM131,TRAP1,UBE4A,WIF1,ZNF366,ZNF608	51 (37)	32
MTCH2		other	BAK1,BAX,EGFR,FOXO3,GRB2,IRF3,JUN,LCP2,Mapk,MAPK1,MAPK14,MET,MTCH2,NCF1,P38 MAPK,PARP1,PI3K (family),PRKCD,PTEN,SHC1,STAT3	3		0.6	0.00228	0.0014	CAD,CD82,CDC42EP3,COBL,COPG2,DBP,GPR63,HNRNPU,HYAL3,IGF2R,LAMP1,LEF1,LEMD3,MKI67,NELL2,NMI,NOX5,NTRK1,POU2F1,PXN,RAD51C,RCAN3,RPTOR,WIF1,ZEB2	25 (21)	16
BCAR3		other	BCAR3,Cdc42,CDH1,CEBPA,CEBPB,Creb,CTNNB1,EGFR,EIF4E,ERK1/2,ESR1,GATA1,IKBKB,ITGB1,Jnk,JUN,MAP2K1,Mapk,MAPK1,MAPK14,MED1,MKNK1,MTOR,NFkB (complex),PAK1,PRKAA1,RB1,RELA,SP1,SRC,STAT3,STAT5a/b,STAT6,SYK	3		-1.64	0.00228	0.0053	AP3M2,CAD,CHCHD3,CLEC4E,COBL,COPG2,DBP,DLST,FAM186A,GHITM,GPR63,HECW2,HNRNPU,INTS1,ISLR2,JAZF1,JPT1,KCNQ3,KLHL29,KLHL31,LAMP1,LEMD3,MAPT,MKI67,MRC2,MYO1D,NELL2,NOX5,NTRK1,PHF11,PTGER4,PTPRE,PXN,RCAN3,RPA3,RPTOR,SIDT1,STX12,TBXAS1,TMCC1,TMEM131,UBE4A,WIF1,ZNF366,ZNF608	45 (34)	31
TNFAIP3		enzyme	Calcineurin protein(s),CDKN1B,CEBPA,CXCL8,EIF4E,EIF4EBP1,ERBB2,ERK1/2,EZH2,FOXO1,GATA1,GLI1,Hsp27,IKBKB,IKK (complex),IL1B,IRF3,Jnk,MAP2K1,MAP2K7,Map3k7,MED1,MYD88,NFE2L2,NFkB (complex),NOS2,PAK2,PKD1,PRKAA1,PRKAA2,RELA,RICTOR,RNF138,SP1,STAT6,STK11,TBK1,TNFAIP3,TP73,TRAF6	3		0.447	0.00228	0.0112	AP3M2,ARL5C,CAPRIN2,CDC14B,CDK5RAP3,CLEC4E,COX7A2L,DBP,GABRA1,HDGFL3,HECW2,IER3,JAZF1,KCNQ3,KLHL29,KLK1,LEF1,MAP2K4,MAPT,MKI67,MRC2,MYO1D,NEAT1,NMI,NOX5,NRSN1,NTRK1,PHF11,PSMC3,PTGER4,PTPRE,PXN,RAD51C,RPTOR,S100A13,SFXN1,SMAD9,TBXAS1,TMEFF2,TMEM131,UBE4A,USP48,VPS13B,ZNF366,ZNF608	45 (40)	35
NOTCH2		transcription regulator	CEBPA,DUSP1,EGFR,estrogen receptor,IKBKB,IKK (complex),LIN28A,MAPK1,MAPK14,MAPK3,NFE2L2,NFkB (complex),NOTCH2,NR3C1,PARP1,RARA,RELA,TP53	3		0.926	0.00228	0.0049	ANXA6,AP3M2,ATP5MC1,CAD,CDC42EP3,CERS6,CLEC4E,COBL,CSMD3,DBP,DLST,FAM186A,FUS,GABRA1,GPR63,IER3,LEF1,MAPT,mir-128,MKI67,MYO1D,NELL2,NMI,NOX5,NRSN1,NTRK1,PHF11,POU2F1,PSMC3,PSMD8,PTGER4,PTPRE,PTPRU,PXN,RAD51C,RCAN3,RPL7,S100A13,SH2D2A,TBXAS1,TRAP1,WIF1	42 (18)	16
NRG4		growth factor	EGFR,ERBB2,ERBB3,Jnk,Mapk,MAPK1,MAPK14,MTOR,NDRG1,NRG4,PGR,PI3K (family),RICTOR,STAT5a/b	3		0	0.00226	0.0028	ATP5MC1,CAD,CD82,CDC14B,CDC42EP3,CLEC4E,COX7A2L,DBP,IER3,ISLR2,LAMP1,LEF1,MAPT,MKI67,MRC2,NMI,NOX5,PSMD8,PXN,RCAN3,RPL7,SLC12A2,STX12,TMCC1,WIF1,ZEB2	26 (14)	12
GRM5		G-protein coupled receptor	ADCY,AKAP5,Akt,CCND1,CDKN1B,CEBPB,CNR1,Creb,CXCR4,DUSP1,EGFR,EIF4E,EP300,ERBB2,ERK,ERK1/2,EZH2,GATA1,GRM5,IKK (complex),IRF3,ITGB1,Jnk,JUN,LIN28A,MAPK1,MAPK3,MED1,MTOR,NFAT5,NFE2L2,NOS2,PARP1,PIK3CB,Pkc(s),PPARG,PPARGC1A,PRKAA1,RARA,RB1,RXRA,SP1,STK11,TSC2	3		-1.109	0.00141	0.0101	AHI1,ANKS1B,ATP5MC1,CAD,CDC14B,CDK5RAP3,CHCHD3,DBP,DLST,FAM186A,FUS,GABRA1,GHITM,GPR63,HDGFL3,HECW2,HNRNPU,IGF2R,INTS1,ISLR2,JAZF1,JPT1,KCNQ3,KLHL29,LAMP1,MAPT,MKI67,MRC2,NELL2,NMI,NOX5,NRSN1,NTRK1,PHF11,POU2F1,PSMC3,PTPRE,RAD51C,RCAN3,RPA3,RPTOR,S100A13,SFXN1,SH2D2A,SIDT1,STX12,TMCC1,TMEFF2,UBE4A,VAMP5,WWOX,ZNF366	52 (44)	38
IGHM		transmembrane receptor	CCND1,CEBPB,Creb,DUSP1,EIF4E,ERK,ERK1/2,GSK3B,IGHM,MEF2C,MEF2D,MTOR,NFkB (complex),NOS2,Notch,PLA2G4A,PPARG,RELA,RXRA,STAT3	3		1.257	0.00141	0.0011	AHI1,AP3M2,BLK,CD82,CDC42EP3,CLEC4E,COBL,COPG2,DBP,INTS1,ISLR2,JPT1,LEF1,LEMD3,MAPT,MKI67,NOX5,NTRK1,PTGER4,PTPRE,PXN,RPA3,SFXN1,SH2D2A,STX12,TBXAS1,TMCC1,UBE4A,VAMP5,WWOX,ZEB2	31 (20)	18
PRKD		group	APP,AR,CCND1,CEBPB,Creb,CREB1,DUSP1,EGFR,EIF4E,EP300,ERK,FOXO1,Hsp27,IKBKB,Jnk,JUN,KAT5,MET,MITF,MKNK1,MPO,MTOR,NFAT5,NFE2L2,NFkB (complex),NOS2,P38 MAPK,PLA2G4A,PPARGC1A,PRKAA2,PRKD,RB1,RELA,RICTOR,RXRA,Smad2/3,SP1,STAT3,STAT6,TCF,TP53	3		-0.962	0.0014	0.0102	AHI1,ANXA6,AP3M2,ATP5MC1,CAD,CD82,CDK5RAP3,CERS6,CHCHD3,CLEC4E,COBL,COPG2,COX7A2L,CSMD3,DBP,DLST,GABRA1,GHITM,HECW2,HNRNPU,IER3,ILDR2,INTS1,ISLR2,JPT1,KCNQ3,KLHL29,LEF1,LEMD3,MAPT,mir-128,MRC2,MYO1D,NELL2,NOX5,NRSN1,NTRK1,PHF11,PITRM1,PSMC3,PSMD8,PTGER4,RPA3,S100A13,SFXN1,SH2D2A,STX12,TMCC1,TMEM131,TRAP1,UBE4A,WWOX,ZNF608	53 (41)	38
RGS10		enzyme	AHR,CEBPA,CEBPB,Creb,CTNNB1,EIF4E,ERK1/2,GATA1,IGF1R,IKBKB,ITGA2B,ITGB3,JUN,LCP2,MAP2K1/2,MAPK1,MED1,MKNK1,MTOR,NFkB (complex),P38 MAPK,PLCG2,PRKAA1,RARA,RELA,RGS10,SP1,STAT3,STAT6,SYK,TCF,TP53	3		-0.143	0.0014	0.0068	ANXA6,AP3M2,CD82,CERS6,CLEC4E,COBL,COPG2,CSMD3,DBP,DLST,FAM186A,GPR63,HECW2,HNRNPU,IGF2R,INTS1,ISLR2,JAZF1,JPT1,KCNQ3,KLHL29,KLHL31,LAMP1,LEF1,MAPT,mir-128,MYO1D,NELL2,NMI,NOX5,NTRK1,PHF11,PSMD8,PTGER4,PTPRE,PTPRU,PXN,RCAN3,RPA3,RPL7,STX12,TBXAS1,TMCC1,TMEM131,TRAP1,UBE4A,WIF1,ZNF366,ZNF608	49 (32)	28
CD79B		transmembrane receptor	CD79A,CD79B,DUSP1,EGFR,FOXO1,FOXO3,Hsp27,IKBKB,IKZF3,Jnk,KRAS,LCP2,LIN28A,MAPK1,MAPK3,MTOR,NFE2L2,NFkB (complex),NOS2,NRAS,PARP1,PI3K (complex),RARA,RB1,RELA,SP1,STAT3,SYK,VAV1	3		-0.302	0.00136	0.0026	AP3M2,CAD,CAMK1,CDK5RAP3,CHCHD3,CLEC4E,COBL,COPG2,DBP,DLST,FAM186A,FUS,GABRA1,GHITM,GPR63,ISLR2,KCNQ3,KLHL31,LAMP1,LEMD3,MAPT,MKI67,MRC2,MYO1D,NELL2,NMI,NOX5,NPR3,NRSN1,NTRK1,PHF11,POU2F1,PSMC3,PTGER4,PTPRE,PXN,RCAN3,S100A13,SEMA5A,SFXN1,SH2D2A,STX12,TMCC1,TRIM11	44 (29)	24
CD6		transmembrane receptor	APP,AR,CD6,CEBPA,CEBPB,Creb,CREB1,CTNNB1,EGFR,EIF4E,EP300,ERK1/2,FOXO1,GATA1,Hsp27,IKBKB,Jnk,JUN,KAT5,MED1,MET,MITF,MKNK1,MTOR,NFAT5,NFE2L2,NFkB (complex),P38 MAPK,PLA2G4A,PPARG,PPARGC1A,PRKAA1,RB1,RELA,RICTOR,Smad2/3,SP1,STAT3,STAT6,TCF,TP53	3		-1.483	0.00136	0.0097	ANXA6,AP3M2,ATP5MC1,CAD,CD82,CDK5RAP3,CERS6,CHCHD3,CLEC4E,COBL,COPG2,COX7A2L,CSMD3,DBP,DLST,GABRA1,GHITM,HECW2,HNRNPU,IER3,ILDR2,INTS1,ISLR2,JAZF1,JPT1,KCNQ3,KLHL29,LEF1,LEMD3,MAPT,mir-128,MRC2,MYO1D,NELL2,NOX5,NRSN1,NTRK1,PHF11,PITRM1,PSMC3,PSMD8,PTGER4,PTPRE,RPA3,S100A13,STX12,TBXAS1,TMCC1,TMEM131,TRAP1,UBE4A,VAMP5,WIF1,ZNF366,ZNF608	55 (41)	40
NBN		other	Akt,ATM,CDKN1B,Creb,EP300,EZH2,FOXO1,FOXO3,IKBKB,IKK (complex),IRF3,MAPK1,MEF2D,MTOR,NBN,NFAT5,NFkB (complex),PPARGC1A,RB1,RELA,SP1,STAT3,TP53,TSC2	3		-0.48	0.00745	0.023	ANXA6,AP3M2,ATP5MC1,BLK,CDK5RAP3,CERS6,CHCHD3,CLEC4E,COBL,COPG2,CSMD3,DBP,DLST,GHITM,HDGFL3,HECW2,INTS1,ISLR2,KCNQ3,LEMD3,MAPT,mir-128,MYO1D,NMI,PHF11,PSMC3,PSMD8,PTGER4,PTPRU,PXN,RAD51C,RCAN3,RPA3,RPL7,RPTOR,STX12,TMCC1,TMEFF2,TRAP1	39 (24)	21
NCSTN		peptidase	Cdc42,CEBPA,CEBPB,Creb,CREB1,CTNNB1,EGFR,ERK1/2,FOXO1,GATA1,Jnk,JUN,Mapk,MAPK1,MAPK14,MED1,MTOR,NCSTN,NFkB (complex),PARP1,PI3K (family),PRKAA1,RELA,SP1,STAT3,STAT6	3		0	0.00738	0.0134	AP3M2,CAD,CDK5RAP3,CLEC4E,COBL,COPG2,DBP,HECW2,HNRNPU,IGF2R,INTS1,ISLR2,JAZF1,JPT1,KCNQ3,KLHL29,LAMP1,MAPT,MKI67,MRC2,NELL2,NMI,NOX5,PHF11,POU2F1,PTGER4,PTPRE,PXN,RCAN3,RPA3,STX12,TBXAS1,TMCC1,TMEM131,WIF1,ZEB2,ZNF366,ZNF608	38 (26)	25
IRS4		other	Creb,ELAVL1,FOXO1,GSK3B,HMGA1,IRF3,IRS4,MTOR,MTORC1,MYC,NCL,P38 MAPK,PI3K (family),PPARGC1A,RICTOR,SP1,SREBF1,STAT3,SYK,TP53	3		-1.151	0.00738	0.018	ANXA6,CAD,CD82,CDC42EP3,CDK5RAP3,CERS6,COBL,COPG2,COX7A2L,CSMD3,DBP,DLST,GPR63,HNRNPU,INTS1,ISLR2,KCNQ3,KLHL31,LEMD3,MAPT,mir-128,MKI67,PHF11,PSMC3,PTPRN2,PTPRU,PXN,RPA3,RPTOR,RTN2,S100A13,SFXN1,SLC12A2,STX12,TMCC1,TRAP1,UBE4A	37 (20)	18
IL3		cytokine	CEBPA,CEBPB,Cpla2,Creb,CREB1,CTNNB1,ERK1/2,GATA1,IL3,JAK2,JUN,MAPK1,MAPK14,MED1,MTOR,NCF1,NFAT5,NFkB (complex),PPARG,PRKAA1,PRKCD,RAC1,RELA,RPS6KA1,SHC1,SP1,STAT3,STAT5a/b,STAT5B,TP53	3		0.603	0.00737	0.0239	ANKS1B,ANXA6,AP3M2,ATP5MC1,CERS6,CLEC4E,COBL,COPG2,CSMD3,DIP2B,DLST,GPR63,HECW2,HNRNPU,HYAL3,IGF2R,INTS1,ISLR2,JAZF1,JPT1,KCNQ3,KLHL29,LAMP1,LEF1,MAPT,mir-128,MKI67,NMI,NOX5,PHF11,PSMD8,PTGER4,PTPRE,PTPRU,PXN,RCAN3,RPA3,RPL7,STX12,TBXAS1,TMCC1,TRAP1,VAMP5,ZNF366	44 (30)	24
MAPKAPK3		kinase	AR,BMI1,CBX4,CEBPB,CREB1,HSF1,HSPB1,IRF3,Jnk,MAP2K7,MAPK14,MAPKAPK3,PRKCD,RPS6KA5,TP53	3		0.898	0.00733	0.0173	ANXA6,ATP5MC1,CLEC4E,COBL,CSMD3,DBP,DLST,GPR63,IER3,ILDR2,JPT1,LAMP1,LEF1,LEMD3,MAP2K4,MAPT,mir-128,MKI67,MRC2,NOX5,PHF11,PITRM1,PSMD8,PTPRU,RPA3,RPL7,RPTOR,SLC12A2,TRAP1,WIF1,ZEB2	31 (15)	10
IL12A		cytokine	Akt,CDKN1B,DDX58,EP300,ERK1/2,EZH2,FOXO1,FOXO3,IL12A,IRF3,Jnk,JUN,MTOR,NFAT5,NFkB (complex),PPARGC1A,RB1,RELA,SP1,STAT3,STAT4,STAT5a/b,TSC2	3		-0.707	0.00726	0.0091	AP3M2,CDC42EP3,CDK5RAP3,CHCHD3,CLEC4E,COBL,COPG2,DBP,DLST,GHITM,GPR63,HDGFL3,HECW2,HNRNPU,IGF2R,ISLR2,KCNQ3,LEMD3,MAPT,MRC2,NMI,NOX5,PHF11,PSMC3,PTGER4,PTPRE,PXN,RPA3,RPTOR,STX12,TMCC1,TMEFF2	32 (23)	20
THBS2		other	Akt,CCND1,CDKN1B,Creb,CREB1,EIF4E,EZH2,FOXO1,FOXO3,IRF3,Jnk,JUN,Mapk,MKNK1,MTOR,NFAT5,NFkB (complex),PI3K (family),PPARGC1A,RAC1,RELA,RXRA,SP1,STAT5a/b,TGM2,THBS2,TP53,TSC2	3		0.632	0.00726	0.0254	AHI1,ANXA6,AP3M2,ATP5MC1,CAD,CDC42EP3,CDK5RAP3,CERS6,CLEC4E,CSMD3,DBP,HDGFL3,HECW2,HNRNPU,IGF2R,INTS1,ISLR2,JPT1,KCNQ3,LEMD3,mir-128,MRC2,NELL2,NOX5,NTRK1,PHF11,PSMC3,PSMD8,PTGER4,PTPRU,PXN,RPA3,RPL7,RPTOR,STX12,TMCC1,TMEFF2,TRAP1,UBE4A,WWOX	40 (28)	25
ADAM12		peptidase	ABL1,ADAM12,Cdc42,CDH1,Creb,CTNNB1,EGFR,EIF4E,ERN1,GSK3B,IGF1R,IKBKB,ITGB1,Jnk,Mapk,MAPK1,MET,MKNK1,MTOR,MYD88,NFkB (complex),P38 MAPK,PAK2,PRKCD,PTEN,PTK2,RB1,RELA,SMAD2,SRC,STAT3,STAT6,SYK,TSC2,YAP1	3		0.324	0.00721	0.0155	AP3M2,ATP5MC1,CAD,CD82,CDC42EP3,CHCHD3,CLEC4E,COBL,COPG2,DBP,DLST,GHITM,IER3,INTS1,ISLR2,KLHL31,LAMP1,LEF1,MAPT,MKI67,MRC2,MYO1D,NELL2,NTRK1,PHF11,PSMC3,PTGER4,RCAN3,RPTOR,SIDT1,SLC12A2,SMAD9,STX12,TMCC1,TMEM131,UBE4A,WIF1,ZNF608	38 (35)	31
FFAR1		G-protein coupled receptor	Akt,CaMKII,Cdc42,CDKN1B,CEBPA,CEBPB,Creb,ERK1/2,Esrra,EZH2,FFAR1,FOXO1,GATA1,IKK (complex),IL1B,Inflammasome (Nalp3, Asc, Casp1),IRF3,Jnk,JUN,MED1,MTOR,NFAT5,NFkB (complex),PPARG,PPARGC1A,PRKAA1,RB1,RELA,SP1,STAT3,STAT5a/b,TSC2	3		-0.926	0.0072	0.0163	AP3M2,ATP5MC1,CDK5RAP3,CHCHD3,CLEC4E,COBL,COPG2,COX7A2L,DBP,DLST,GHITM,GPR63,HDGFL3,HECW2,HNRNPU,IGF2R,INTS1,ISLR2,JAZF1,JPT1,KCNQ3,KLHL29,LAMP1,MKI67,MRC2,NEAT1,NMI,NOX5,PHF11,PSMC3,PTGER4,PTPRE,PXN,RAD51C,RPA3,RPTOR,STX12,TBXAS1,TMCC1,TMEFF2,VAMP5,ZNF366	42 (32)	28
TMED10		transporter	APP,AR,CDKN1B,Creb,FOXO1,IKBKB,Jnk,MAP3K8,MAPK14,MTOR,MYC,NFE2L2,NFkB (complex),PLA2G4A,RICTOR,ROCK,SLC9A1,Smad2/3,SP1,STAT6,TMED10,TP53,YAP1	3		0.617	0.0072	0.0241	ANXA6,ATP5MC1,CAD,CDC42EP3,CDK5RAP3,CERS6,CLEC4E,COX7A2L,CSMD3,DBP,DLST,GABRA1,GPR63,ILDR2,INTS1,ISLR2,KCNQ3,LEMD3,MAPT,mir-128,MRC2,MYO1D,NOX5,NRSN1,PHF11,PITRM1,PSMC3,PSMD8,PTGER4,PTPRU,PXN,RTN2,S100A13,SLC12A2,STX12,TMCC1,TMEFF2,TMEM131,TRAP1,WIF1,ZEB2,ZNF608	42 (23)	21
LGR4		transmembrane receptor	Cdc42,Creb,CREB1,CTNNB1,EGFR,EGR1,FOXO1,Jnk,LGR4,LRP6,MAPK1,MAPK14,PARP1,RELA,SP1,STAT3,STAT5a/b,STAT6,TP53	3		0.493	0.00712	0.0191	ANXA6,AP3M2,ATP5MC1,CAD,CDK5RAP3,CERS6,COBL,COPG2,CSMD3,DLST,GPR63,INTS1,KCNQ3,LAMP1,LEF1,LEMD3,mir-128,MKI67,MRC2,NELL2,NMI,NOX5,PHF11,POU2F1,PSMD8,PTGER4,PTPRE,PTPRU,PXN,RCAN3,RPL7,SLC12A2,TMEM131,TRAP1,WIF1,ZEB2,ZNF608	37 (19)	18
PTGFR		G-protein coupled receptor	Cdc42,CEBPA,CEBPB,Creb,CREB1,CTNNB1,EGFR,ERK1/2,FOXO1,GATA1,Jnk,JUN,Mapk,MAPK1,MAPK14,MED1,MTOR,NFkB (complex),PARP1,PI3K (family),PRKAA1,PTGFR,RELA,SP1,STAT3,STAT6	3		0	0.00709	0.0118	AP3M2,CAD,CDK5RAP3,CLEC4E,COBL,COPG2,DBP,HECW2,HNRNPU,IGF2R,INTS1,ISLR2,JAZF1,JPT1,KCNQ3,KLHL29,LAMP1,MAPT,MKI67,MRC2,NELL2,NMI,NOX5,PHF11,POU2F1,PTGER4,PTPRE,PXN,RCAN3,RPA3,STX12,TBXAS1,TMCC1,TMEM131,WIF1,ZEB2,ZNF366,ZNF608	38 (26)	25
MMP8		peptidase	Cdc42,CEBPA,CEBPB,Creb,CREB1,CTNNB1,EGFR,ERK1/2,FOXO1,GATA1,Jnk,JUN,Mapk,MAPK1,MAPK14,MED1,MMP8,MTOR,NFkB (complex),PARP1,PI3K (family),PRKAA1,RELA,SP1,STAT3,STAT6	3		0	0.00705	0.0117	AP3M2,CAD,CDK5RAP3,CLEC4E,COBL,COPG2,DBP,HECW2,HNRNPU,IGF2R,INTS1,ISLR2,JAZF1,JPT1,KCNQ3,KLHL29,LAMP1,MAPT,MKI67,MRC2,NELL2,NMI,NOX5,PHF11,POU2F1,PTGER4,PTPRE,PXN,RCAN3,RPA3,STX12,TBXAS1,TMCC1,TMEM131,WIF1,ZEB2,ZNF366,ZNF608	38 (26)	25
PRTN3		peptidase	Calcineurin protein(s),CEBPA,CEBPB,Creb,CTNNB1,CXCL8,ERK1/2,GATA1,GSK3B,Hsp27,IGF1R,IKBKB,IKK (complex),IL1B,INSR,Jnk,JUN,MAP2K7,Mapk,MAPK1,MAPK14,MED1,MTOR,NFkB (complex),NOS2,P38 MAPK,PAK2,Pkc(s),PRKAA1,PRKCD,PRTN3,PTGS2,RELA,SP1,STAT3,STAT5a/b	3		-0.781	0.00702	0.0147	AP3M2,ATP5MC1,CD82,CERS6,CLEC4E,COBL,COPG2,DBP,HECW2,HNRNPU,INTS1,ISLR2,JAZF1,JPT1,KCNQ3,KLHL29,LAMP1,LEMD3,MAP2K4,MAPT,MKI67,MRC2,MYO1D,NEAT1,NMI,NOX5,NTRK1,PHF11,PTGER4,PTPRE,PXN,RAD51C,RCAN3,RPA3,SFXN1,SMAD9,STX12,TBXAS1,TMCC1,WIF1,ZNF366	41 (36)	34
PLCE1		enzyme	AR,CEBPA,CEBPB,CTNNB1,DUSP1,ERK1/2,ERN1,GATA1,Jnk,MED1,MTOR,PEA15,PLCE1,PRKAA1,PRKD,PRKD1,PTEN,RELA,SP1,STAT3,STAT5a/b,TP53	3		-0.949	0.00702	0.0201	ANXA6,AP3M2,ATP5MC1,CAD,CERS6,COBL,COPG2,CSMD3,DLST,GPR63,HECW2,ILDR2,ISLR2,JAZF1,JPT1,KCNQ3,KLHL29,LEF1,LEMD3,MAPT,mir-128,MRC2,NOX5,NTRK1,PITRM1,PSMD8,PTGER4,PTPRE,PTPRU,PXN,RAD51C,RPA3,RPL7,SH2D2A,STX12,TBXAS1,TMCC1,TRAP1,WIF1,ZNF366	40 (22)	18
SNX1		transporter	Cdc42,CEBPA,CEBPB,Creb,CREB1,CTNNB1,EGFR,ERK1/2,FOXO1,GATA1,Jnk,JUN,Mapk,MAPK1,MAPK14,MED1,MTOR,NADPH oxidase,NFkB (complex),PARP1,PI3K (family),PRKAA1,RELA,SNX1,SP1,STAT3,STAT6	3		0	0.00701	0.0115	AP3M2,CAD,CDK5RAP3,CLEC4E,COBL,COPG2,DBP,HECW2,HNRNPU,IGF2R,INTS1,ISLR2,JAZF1,JPT1,KCNQ3,KLHL29,LAMP1,MAPT,MKI67,MRC2,NELL2,NMI,NOX5,PHF11,POU2F1,PTGER4,PTPRE,PXN,RCAN3,RPA3,STX12,TBXAS1,TMCC1,TMEM131,WIF1,ZEB2,ZNF366,ZNF608	38 (27)	25
TP53I3		enzyme	CHEK1,E2F3,ERK1/2,H2AX,MAPK1,PARP1,RELA,TP53,TP53I3	3		0.756	0.00698	0.0112	ANXA6,AP3M2,ATP5MC1,CD82,CDC42EP3,CERS6,CSMD3,DBP,DLST,GPR63,IER3,LEF1,mir-128,NEAT1,NELL2,NMI,NOX5,PHF11,POU2F1,PSMD8,PTGER4,PTPRE,PTPRU,PXN,RCAN3,RPL7,TRAP1,ZEB2	28 (9)	6
ADAM9		peptidase	ADAM9,Cdc42,CEBPA,CEBPB,Creb,CREB1,CTNNB1,EGFR,ERK1/2,FOXO1,GATA1,Jnk,JUN,Mapk,MAPK1,MAPK14,MED1,MTOR,NFkB (complex),PARP1,PI3K (family),PRKAA1,RELA,SP1,STAT3,STAT6	3		0	0.00697	0.0116	AP3M2,CAD,CDK5RAP3,CLEC4E,COBL,COPG2,DBP,HECW2,HNRNPU,IGF2R,INTS1,ISLR2,JAZF1,JPT1,KCNQ3,KLHL29,LAMP1,MAPT,MKI67,MRC2,NELL2,NMI,NOX5,PHF11,POU2F1,PTGER4,PTPRE,PXN,RCAN3,RPA3,STX12,TBXAS1,TMCC1,TMEM131,WIF1,ZEB2,ZNF366,ZNF608	38 (26)	25
MED28		other	APP,AR,CEBPA,CEBPB,Creb,CREB1,CTNNB1,EGFR,EIF4E,EP300,ERK1/2,FOXO1,GATA1,Hsp27,IKBKB,Jnk,JUN,KAT5,MED1,MED28,MET,MITF,MKNK1,MTOR,NFAT5,NFE2L2,NFkB (complex),P38 MAPK,PLA2G4A,PPARG,PPARGC1A,PRKAA1,RB1,RELA,RICTOR,Smad2/3,SP1,STAT3,STAT6,TCF,TP53	3		-1.483	0.00136	0.0098	ANXA6,AP3M2,ATP5MC1,CAD,CD82,CDK5RAP3,CERS6,CHCHD3,CLEC4E,COBL,COPG2,COX7A2L,CSMD3,DBP,DLST,GABRA1,GHITM,HECW2,HNRNPU,IER3,ILDR2,INTS1,ISLR2,JAZF1,JPT1,KCNQ3,KLHL29,LEF1,LEMD3,MAPT,mir-128,MRC2,MYO1D,NELL2,NOX5,NRSN1,NTRK1,PHF11,PITRM1,PSMC3,PSMD8,PTGER4,PTPRE,RPA3,S100A13,STX12,TBXAS1,TMCC1,TMEM131,TRAP1,UBE4A,VAMP5,WIF1,ZNF366,ZNF608	55 (41)	40
C5		other	Akt,C5,CDKN1B,CEBPA,CEBPB,Creb,DUSP1,EGFR,EP300,ERK1/2,EZH2,FOXO1,GATA1,IKK (complex),IRF3,LIN28A,MAP2K7,MAPK1,MAPK14,MAPK3,MED1,MTOR,NFAT5,NFE2L2,PARP1,PPARGC1A,PRKAA1,RARA,RB1,RELA,SP1,STAT3,TP53,TSC2	3		-1.786	0.00135	0.0075	ANXA6,AP3M2,ATP5MC1,CAD,CDK5RAP3,CERS6,CHCHD3,COBL,COPG2,CSMD3,DLST,FAM186A,FUS,GABRA1,GHITM,HDGFL3,HECW2,INTS1,ISLR2,JAZF1,JPT1,KCNQ3,KLHL29,LEF1,MAP2K4,MAPT,mir-128,MKI67,NELL2,NMI,NOX5,NRSN1,NTRK1,PHF11,POU2F1,PSMC3,PSMD8,PTGER4,PTPRE,RAD51C,RCAN3,RPA3,RPL7,RPTOR,S100A13,SH2D2A,STX12,TBXAS1,TMCC1,TMEFF2,TRAP1,WIF1,ZNF366	53 (34)	31
T-type Calcium Channel		complex	CEBPA,CEBPB,Creb,CREB1,CTNNB1,EGFR,ELAVL1,ERK1/2,ESR1,GATA1,H/K/NRAS,IKBKB,IKK (complex),INSR,Jnk,JUN,MAPK1,MED1,MTOR,NFkB (complex),PRKAA1,PRKCA,RB1,RELA,SP1,STAT3,T-type Calcium Channel,TP73	3		0.152	0.00132	0.0041	AP3M2,ARL5C,ATP5MC1,CAD,CERS6,CHCHD3,CLEC4E,COBL,COPG2,DLST,FAM186A,GHITM,GPR63,HECW2,HNRNPU,IGF2R,INTS1,ISLR2,JAZF1,JPT1,KCNQ3,KLHL29,LEF1,LEMD3,MAPT,MKI67,MRC2,MYO1D,NOX5,NTRK1,PHF11,PTGER4,PTPRE,PTPRN2,PXN,RAD51C,RCAN3,RPA3,STX12,TBXAS1,TMCC1,WIF1,ZNF366	43 (28)	25
CXCL11		cytokine	CEBPA,CEBPB,Creb,CTNNB1,CXCL11,ERK1/2,FOXO1,GATA1,Hsp27,IKBKB,IRF3,Jnk,JUN,KRAS,MAP2K1,MAPK1,MED1,MTOR,NFkB (complex),NOS2,NRAS,PI3K (complex),PRKAA1,RB1,RELA,SP1,STAT3,STAT5a/b	3		-0.926	0.00131	0.0034	AP3M2,CAMK1,CDK5RAP3,CHCHD3,CLEC4E,COBL,COPG2,DBP,DLST,GHITM,GPR63,HECW2,HNRNPU,IGF2R,INTS1,ISLR2,JAZF1,JPT1,KCNQ3,KLHL29,LEF1,MAPT,MKI67,MRC2,MYO1D,NMI,NOX5,NPR3,NTRK1,PTGER4,PTPRE,PXN,RCAN3,RPA3,RPTOR,SFXN1,STX12,TBXAS1,TMCC1,TRIM11,WIF1,ZNF366	42 (28)	26
EDA		cytokine	CCND1,Cdc42,CEBPB,Creb,CREB1,CTNNB1,DUSP1,EDA,EGFR,EIF4E,ERK,FOXO1,Jnk,JUN,Mapk,MAPK1,MAPK14,MTOR,NFkB (complex),NOS2,PARP1,PI3K (family),PLA2G4A,PPARG,RELA,RXRA,SP1,STAT3,STAT6	3		1.093	0.0013	0.0033	AHI1,AP3M2,CAD,CDK5RAP3,CLEC4E,COBL,COPG2,DBP,HNRNPU,IGF2R,INTS1,ISLR2,JPT1,KCNQ3,LAMP1,MAPT,MKI67,MRC2,NELL2,NMI,NOX5,NTRK1,PHF11,POU2F1,PTGER4,PTPRE,PXN,RCAN3,RPA3,SFXN1,SH2D2A,STX12,TBXAS1,TMCC1,TMEM131,UBE4A,VAMP5,WIF1,WWOX,ZEB2,ZNF608	41 (29)	28
ASGR1		transmembrane receptor	ASGR1,CCND1,Cdc42,CEBPB,Creb,CREB1,CTNNB1,DUSP1,EGFR,EIF4E,ERK,FOXO1,Jnk,JUN,Mapk,MAPK1,MAPK14,MTOR,NFkB (complex),NOS2,PARP1,PI3K (family),PLA2G4A,PPARG,RELA,RXRA,SP1,STAT3,STAT6	3		1.093	0.0013	0.0033	AHI1,AP3M2,CAD,CDK5RAP3,CLEC4E,COBL,COPG2,DBP,HNRNPU,IGF2R,INTS1,ISLR2,JPT1,KCNQ3,LAMP1,MAPT,MKI67,MRC2,NELL2,NMI,NOX5,NTRK1,PHF11,POU2F1,PTGER4,PTPRE,PXN,RCAN3,RPA3,SFXN1,SH2D2A,STX12,TBXAS1,TMCC1,TMEM131,UBE4A,VAMP5,WIF1,WWOX,ZEB2,ZNF608	41 (29)	27
ESR2		ligand-dependent nuclear receptor	AR,CCND1,CEBPB,Creb,CTNNB1,EGFR,EIF4E,ERBB2,ERK,ESR2,FOXO1,GATA1,IKBKB,IKK (complex),Jnk,JUN,KDM1A,KDM5A,KDM5B,LIN28A,MAPK1,MAPK14,MTOR,MYC,NCOA3,NFkB (complex),NOS2,RICTOR,SIRT1,SP1,STAT3,STAT6	3		-0.14	0.00126	0.0079	AHI1,BBS9,CAD,CDC14B,CDK5RAP3,CHCHD3,CLEC4E,COPG2,COX7A2L,DBP,FOXN4,FUS,GHITM,HNRNPU,IER3,IGF2R,ILDR2,INTS1,ISLR2,JAZF1,JPT1,KCNQ3,LRCH1,LRP1B,MAPT,MKI67,MRC2,MYO1D,NMI,NOX5,PHF11,PITRM1,PSMC3,PTPRE,PXN,RAD51C,RCAN3,RPA3,RTN2,SFXN1,SLC12A2,STX12,TMCC1,TMEM131,TOMM70,UBE4A,WIF1,WWOX,ZEB2,ZNF366,ZNF608	51 (32)	30
PLA2G4A		enzyme	Cdc42,CDH1,FOXO1,IKZF3,IL1B,Inflammasome (Nalp3, Asc, Casp1),Jnk,JUN,LCP2,MAPK1,MAPK14,MTOR,NFkB (complex),P38 MAPK,PLA2G4A,PRKCD,RELA,STAT3,SYK,TP53	3		0.156	0.00125	0.0025	ANXA6,AP3M2,ATP5MC1,CD82,CDK5RAP3,CERS6,CLEC4E,COBL,COPG2,CSMD3,DBP,DLST,GPR63,HNRNPU,IGF2R,ISLR2,KLHL31,LAMP1,LEF1,LEMD3,MAPT,mir-128,MRC2,NEAT1,NOX5,PHF11,PSMD8,PTGER4,PTPRE,PTPRU,PXN,RCAN3,RPL7,RPTOR,SEMA5A,SLC12A2,STX12,TMCC1,TRAP1,WIF1,ZEB2	41 (20)	19
HAP1		other	CEBPA,CEBPB,Creb,DUSP1,EGFR,EIF4E,EP300,HAP1,Hsp27,IKBKB,KAT5,LIN28A,MAPK1,MAPK14,MAPK3,MET,MITF,MKNK1,MTOR,NFAT5,NFE2L2,NFkB (complex),P38 MAPK,PARP1,PPARG,PPARGC1A,RARA,RB1,RELA,SP1,TP53	3		-0.7	0.00125	0.0057	ANXA6,AP3M2,ATP5MC1,CAD,CD82,CERS6,CHCHD3,CLEC4E,COBL,CSMD3,DBP,DLST,FAM186A,FUS,GABRA1,GHITM,HECW2,IER3,INTS1,ISLR2,JPT1,KCNQ3,LEF1,LEMD3,MAPT,mir-128,MKI67,MYO1D,NELL2,NMI,NOX5,NRSN1,NTRK1,PHF11,POU2F1,PSMC3,PSMD8,PTGER4,PTPRE,RCAN3,RPA3,RPL7,S100A13,SH2D2A,STX12,TBXAS1,TMCC1,TRAP1,UBE4A,VAMP5,WIF1	51 (31)	29
STK26		kinase	CCND1,CEBPB,Creb,DUSP1,EIF4E,ERK,ERK1/2,GSK3B,JUN,MTOR,NFkB (complex),NOS2,Notch,PLA2G4A,PPARG,RELA,RXRA,STAT3,STK26,YAP1	3		0.354	0.00123	0.0015	AHI1,AP3M2,CD82,CDC42EP3,CLEC4E,COBL,COPG2,DBP,HNRNPU,IGF2R,INTS1,ISLR2,JPT1,LEF1,LEMD3,MAPT,MKI67,NOX5,NTRK1,PTGER4,PTPRE,PXN,RPA3,SFXN1,SH2D2A,STX12,TBXAS1,TMCC1,UBE4A,VAMP5,WWOX,ZEB2	32 (20)	18
mir-25		microRNA	APP,AR,CCND1,CEBPB,Creb,DUSP1,EGFR,EIF4E,EP300,ERK,FOXO1,GATA1,Hsp27,IKBKB,Jnk,JUN,KAT5,mir-25,MITF,MKNK1,MTOR,NFAT5,NFE2L2,NFKBIA,NOS2,P38 MAPK,PPARGC1A,RB1,RELA,RICTOR,RXRA,SP1,STAT3,STAT6	3		0.59	0.00122	0.0085	AHI1,AP3M2,CAD,CD82,CDK5RAP3,CHCHD3,COBL,COPG2,COX7A2L,GABRA1,GHITM,HECW2,HNRNPU,IER3,IGF2R,ILDR2,INTS1,ISLR2,JAZF1,JPT1,KCNQ3,LEF1,LEMD3,MAP2K4,MAPT,MRC2,MYO1D,NELL2,NRSN1,NTRK1,PHF11,PITRM1,PSMC3,PTGER4,PXN,RPA3,S100A13,SFXN1,SH2D2A,STX12,TMCC1,TMEM131,UBE4A,WWOX,ZNF366,ZNF608	46 (34)	32
FYB2		other	Akt,CDKN1B,DUSP1,EGFR,EP300,EZH2,FOXO1,FOXO3,FYB2,IRF3,Jnk,JUN,LIN28A,Mapk,MAPK1,MTOR,NCL,NFAT5,NFkB (complex),PARP1,PLCG1,PPARGC1A,RARA,RB1,RELA,SP1,STAT3,TSC2	3		-0.316	0.00119	0.0024	AP3M2,CAD,CDK5RAP3,CHCHD3,CLEC4E,COBL,COPG2,DBP,DLST,FAM186A,FUS,GHITM,GPR63,HDGFL3,HECW2,HNRNPU,IGF2R,ISLR2,KCNQ3,LEMD3,MAPT,MKI67,MRC2,NELL2,NMI,NOX5,NTRK1,PHF11,POU2F1,PSMC3,PTGER4,PXN,RCAN3,RPA3,RPTOR,SH2D2A,STX12,TMCC1,TMEFF2,UBE4A	40 (28)	25
G protein		complex	ADCY,CEBPA,CEBPB,CTNNB1,ERK1/2,FOXO1,G protein,GATA1,Hsp27,IKBKB,IRF3,Jnk,JUN,KRAS,MAP2K1,MAPK1,MED1,MTOR,NFkB (complex),NOS2,NRAS,PI3K (complex),RB1,RELA,SP1,STAT3,STAT5a/b,STK11	3		-0.781	0.00118	0.0031	AP3M2,ATP5MC1,CAMK1,CDK5RAP3,CHCHD3,CLEC4E,COBL,COPG2,DBP,DLST,GHITM,GPR63,HECW2,HNRNPU,IGF2R,ISLR2,JAZF1,JPT1,KCNQ3,LEF1,MAPT,MKI67,MRC2,MYO1D,NMI,NOX5,NPR3,NTRK1,PTGER4,PTPRE,PXN,RCAN3,RPA3,RPTOR,SFXN1,STX12,TBXAS1,TMCC1,TRIM11,WIF1,ZNF366	41 (28)	25
ADRA2B		G-protein coupled receptor	ADRA2B,CEBPA,CEBPB,Creb,CTNNB1,DUSP1,EGFR,ERK1/2,GATA1,GSK3B,JUN,LIN28A,MAPK1,MAPK14,MAPK3,MED1,MTOR,NFE2L2,NFkB (complex),PARP1,PRKAA1,RARA,RELA,SP1,STAT3	3		0.309	0.00118	0.0025	AP3M2,CAD,CD82,CLEC4E,COBL,COPG2,DBP,FAM186A,FUS,GABRA1,HECW2,HNRNPU,IGF2R,INTS1,ISLR2,JAZF1,JPT1,KCNQ3,KLHL29,LEF1,LEMD3,MAPT,MKI67,NELL2,NMI,NOX5,NRSN1,NTRK1,PHF11,POU2F1,PSMC3,PTGER4,PTPRE,PXN,RCAN3,RPA3,S100A13,SH2D2A,STX12,TBXAS1,TMCC1,ZNF366	42 (25)	24
PROC		peptidase	AKT1,CASP8,Cdc42,CEBPA,CEBPB,DUSP1,EGFR,EIF4E,ERBB2,FOXO1,FOXO3,FOXO4,IKBKB,IKK (complex),IRF3,Jnk,JUN,LIN28A,MAPK1,MITF,MMP2,NFAT5,NFkB (complex),P38 MAPK,PARP1,PPARG,PPARGC1A,PROC,RARA,RB1,RELA,STAT3,STAT6,TP53,TSC2	3		0.7	0.00118	0.0074	ANXA6,AP3M2,ATP5MC1,CAD,CD82,CDC14B,CDK5RAP3,CERS6,CHCHD3,CLEC4E,COBL,COPG2,CSMD3,DBP,DLST,FAM186A,FUS,GHITM,HECW2,HNRNPU,IER3,IGF2R,JPT1,LAMP1,LEMD3,mir-128,MKI67,MRC2,MYO1D,NMI,NOX5,PHF11,POU2F1,PSMC3,PSMD8,PTGER4,PTPRE,PXN,RAD51C,RCAN3,RPA3,RPL7,RPTOR,SH2D2A,TBXAS1,TMEM131,TRAP1,UBE4A,VAMP5,ZEB2,ZNF608	51 (35)	31
Metalloprotease		group	CEBPA,CEBPB,Creb,CTNNB1,DUSP1,EGFR,ERK1/2,GATA1,GSK3B,JUN,LIN28A,MAPK1,MAPK14,MAPK3,MED1,Metalloprotease,MTOR,NFE2L2,NFkB (complex),PARP1,PRKAA1,RARA,RELA,SP1,STAT3	3		0	0.00117	0.0025	AP3M2,CAD,CD82,CLEC4E,COBL,COPG2,DBP,FAM186A,FUS,GABRA1,HECW2,HNRNPU,IGF2R,INTS1,ISLR2,JAZF1,JPT1,KCNQ3,KLHL29,LEF1,LEMD3,MAPT,MKI67,NELL2,NMI,NOX5,NRSN1,NTRK1,PHF11,POU2F1,PSMC3,PTGER4,PTPRE,PXN,RCAN3,RPA3,S100A13,SH2D2A,STX12,TBXAS1,TMCC1,ZNF366	42 (25)	23
ADRA2A		G-protein coupled receptor	ADRA2A,CEBPA,CEBPB,Creb,CTNNB1,DUSP1,EGFR,ERK1/2,GATA1,GSK3B,JUN,LIN28A,MAPK1,MAPK14,MAPK3,MED1,MTOR,NFE2L2,NFkB (complex),PARP1,PRKAA1,RARA,RELA,SP1,STAT3	3		0	0.00117	0.0025	AP3M2,CAD,CD82,CLEC4E,COBL,COPG2,DBP,FAM186A,FUS,GABRA1,HECW2,HNRNPU,IGF2R,INTS1,ISLR2,JAZF1,JPT1,KCNQ3,KLHL29,LEF1,LEMD3,MAPT,MKI67,NELL2,NMI,NOX5,NRSN1,NTRK1,PHF11,POU2F1,PSMC3,PTGER4,PTPRE,PXN,RCAN3,RPA3,S100A13,SH2D2A,STX12,TBXAS1,TMCC1,ZNF366	42 (25)	23
Ppp1cc		phosphatase	APP,AR,CCND1,CEBPA,CEBPB,Creb,CREB1,CTNNB1,EGFR,EIF4E,EP300,ERK1/2,FOXO1,GATA1,Hsp27,IKBKB,IKKA/B,Jnk,JUN,KAT5,MED1,MET,MITF,MKNK1,MTOR,NFAT5,NFE2L2,NFKBIA,P38 MAPK,PLA2G4A,PPARG,PPARGC1A,Ppp1cc,PRKAA1,RB1,RELA,RICTOR,SP1,STAT3,STAT6,TCF	3		1.571	0.00116	0.0061	AHI1,AP3M2,CAD,CD82,CDK5RAP3,CHCHD3,COBL,COPG2,COX7A2L,DLST,GABRA1,GHITM,GPR63,HECW2,HNRNPU,IER3,ILDR2,INTS1,ISLR2,JAZF1,JPT1,KCNQ3,KLHL29,LEF1,MAPT,MRC2,MYO1D,NELL2,NOX5,NRSN1,NTRK1,PHF11,PITRM1,PSMC3,PTGER4,PTPRE,RPA3,S100A13,STX12,TBXAS1,TMCC1,TMEM131,UBE4A,VAMP5,WIF1,WWOX,ZEB2,ZNF366,ZNF608	49 (41)	38
Akt		group	Akt,AR,BRAF,CCND1,CDKN1B,CTNNB1,DUSP1,EP300,ERK,ERK1/2,ESR1,Esrra,EZH2,Foxo,FOXO1,FOXO3,GATA1,IKBKB,IKK (complex),IRF3,JINK1/2,Jnk,JUN,KDM1A,KDM5B,LEF1,MAPK1,MTOR,NFAT5,NFkB (complex),NOS2,NOS3,PARP1,PPARG,PPARGC1A,PRKAA1,RB1,RELA,RICTOR,RPS6KB1,RXRA,SIRT1,SP1,STAT1,STAT3,STAT5a/b,STAT6,TARDBP,TSC2,USP8,ZBTB16	3		0.132	0.00116	0.0095	AHI1,AP3M2,BBS9,CDC42EP3,CDK5RAP3,CHCHD3,CLEC4E,COBL,COPG2,COX7A2L,DBP,DLST,FAM186A,FOXN4,GHITM,GPR63,HDGFL3,HECW2,HNRNPU,IGF2R,ILDR2,ISLR2,JAZF1,KCNQ3,KLHL29,LEMD3,LRCH1,MAPT,MRC2,MYO1D,NELL2,NOX5,NTN4,NTRK1,PHF11,PITRM1,POU2F1,PSMC3,PTGER4,PTPRE,PXN,RAD51C,RCAN3,RPA3,RPTOR,SFXN1,SH2D2A,STX12,TBC1D1,TMCC1,TMEFF2,TMEM131,UPP2,VAMP5,WWOX,ZNF366,ZNF608	57 (51)	41
YWHAG		other	Akt,CDKN1B,CEBPB,Creb,DUSP1,EP300,ERBB2,EZH2,FOXO1,Hsp27,IKBKB,IKK (complex),IRF3,KRAS,LIN28A,MAP2K1,MAP2K7,MAPK1,MAPK14,MTOR,NFAT5,NOS2,NR4A1,NRAS,PARP1,PI3K (complex),PPARGC1A,RARA,RB1,RELA,SP1,STK11,TP53,TSC2,YWHAG	3		-1.571	0.00115	0.0094	ANXA6,AP3M2,CAMK1,CDC14B,CDK5RAP3,CERS6,CHCHD3,CSMD3,DLST,FAM186A,FUS,GHITM,HDGFL3,HECW2,INTS1,ISLR2,JPT1,KCNQ3,KLHL29,LEF1,MAP2K4,MAPT,mir-128,MKI67,MYO1D,NELL2,NMI,NOX5,NPR3,NTRK1,PHF11,POU2F1,PSMC3,PSMD8,PTGER4,PTPRU,RAD51C,RCAN3,RPA3,RPL7,RPTOR,SFXN1,SH2D2A,STX12,TMCC1,TMEFF2,TRAP1,TRIM11,WIF1	49 (35)	32
CTLA4		transmembrane receptor	Akt,AR,CCND1,CDKN1B,CEBPB,Creb,CTLA4,DUSP1,EGFR,EIF4E,ERK,EZH2,FOXO1,IKK (complex),IRF3,Jnk,LCP2,LIN28A,MAPK1,NFAT5,NFE2L2,NFkB (complex),NOS2,PARP1,PPARG,PPARGC1A,RARA,RB1,RELA,RICTOR,RXRA,STAT3,STAT6,TSC2,ZAP70	3		-0.577	0.00114	0.0082	AHI1,AP3M2,CAD,CDK5RAP3,CHCHD3,CLEC4E,COBL,COPG2,COX7A2L,DBP,FAM186A,FUS,GABRA1,GHITM,HDGFL3,HECW2,IER3,ILDR2,INTS1,JPT1,LAMP1,LEF1,MKI67,MRC2,NELL2,NMI,NOX5,NRSN1,NTRK1,PHF11,PITRM1,POU2F1,PSMC3,PTGER4,PXN,RAD51C,RCAN3,RPA3,RPTOR,S100A13,SFXN1,SH2D2A,TMEFF2,TMEM131,UBE4A,VAMP5,WWOX,ZNF608	48 (35)	32
LY96		transmembrane receptor	AR,CEBPA,CEBPB,Creb,DUSP1,EGFR,ERK1/2,IKBKB,IKK (complex),INSR,IRF3,LIN28A,LY96,MAP2K7,MAPK1,MAPK14,MAPK8,MTOR,NFkB (complex),NR3C1,PARP1,PRKCD,PTEN,RARA,RB1,RELA,SIRT1,SP1,TLR4,TP53,TSC2	3		-0.687	0.00113	0.0074	ANXA6,AP3M2,ATP5MC1,CAD,CDC42EP3,CERS6,CHCHD3,CLEC4E,CSMD3,DBP,DLST,FAM186A,FUS,GHITM,HNRNPU,IER3,ILDR2,INTS1,ISLR2,JPT1,KCNQ3,LAMP1,LEF1,LEMD3,LRCH1,MAP2K4,mir-128,MKI67,MYO1D,NELL2,NMI,NOX5,NTRK1,PHF11,PITRM1,POU2F1,PSMC3,PSMD8,PTGER4,PTPRE,PTPRU,PXN,RAD51C,RCAN3,RPA3,RPL7,RPTOR,SH2D2A,STX12,TBXAS1,TMCC1,TRAP1,WIF1	53 (31)	29
SCGB3A1		cytokine	Akt,CCND1,CDKN1B,EP300,EZH2,FOXO1,FOXO3,IRF3,Jnk,JUN,MTOR,NFAT5,NFkB (complex),PPARGC1A,RB1,RELA,SCGB3A1,SP1,STAT3,STAT5a/b,TP53,TSC2	3		0.762	0.00113	0.0035	AHI1,ANXA6,AP3M2,ATP5MC1,CDK5RAP3,CERS6,CHCHD3,CLEC4E,COBL,COPG2,CSMD3,DBP,DLST,GHITM,GPR63,HDGFL3,HECW2,HNRNPU,IGF2R,ISLR2,JPT1,KCNQ3,LEMD3,MAPT,mir-128,MKI67,MRC2,NOX5,PHF11,PSMC3,PSMD8,PTGER4,PTPRU,PXN,RPA3,RPL7,RPTOR,STX12,TMCC1,TMEFF2,TRAP1,WWOX,ZEB2	43 (22)	20
mir-155		microRNA	Akt,CCND1,CDKN1B,CEBPB,DUSP1,EGFR,EIF4E,EP300,ERK,EZH2,FOXO1,Gsk3,IGF1R,INPP5D,IRF3,Jnk,Mapk,mir-155,MKNK1,MTOR,NFAT5,NFE2L2,NFkB (complex),NOS2,PPARG,PPARGC1A,PRKCD,RB1,RELA,RXRA,SP1,TBK1,TFEB,TP53,TSC2	3		-0.289	0.00113	0.006	AHI1,ANXA6,AP3M2,ATP5MC1,CAD,CDK5RAP3,CERS6,CHCHD3,CLEC4E,CSMD3,DBP,DLST,GABRA1,GHITM,HDGFL3,HECW2,ISLR2,JPT1,KCNQ3,LAMP1,LEF1,MAPT,mir-128,MRC2,NELL2,NMI,NRSN1,NTRK1,PHF11,PSMC3,PSMD8,PTGER4,PTPRU,PXN,RPA3,RPL7,RPTOR,S100A13,SFXN1,SH2D2A,STX12,TBXAS1,TMCC1,TMEFF2,TRAP1,UBE4A,VAMP5,WWOX	48 (35)	30
LTB4R		G-protein coupled receptor	ABL1,ADCY,CCND1,Cdc42,CDH1,CEBPB,DUSP1,EIF4E,ERK,FOXO1,IKZF3,Jnk,LTB4R,MAPK1,MAPK14,MTOR,MYC,MYD88,NFAT5,NFkB (complex),NOS2,PLA2G4A,PLCG2,PPARG,Rac,RAC1,RELA,RXRA,STAT3,STAT5a/b,STK11,SYK,TICAM1,TP53	3		0.438	0.00112	0.0045	AHI1,ANXA6,AP3M2,CAD,CDK5RAP3,CERS6,CLEC4E,COBL,COPG2,CSMD3,DLST,GPR63,HECW2,HNRNPU,ISLR2,JPT1,KLHL29,KLHL31,LAMP1,MAPT,mir-128,MKI67,MRC2,NMI,NOX5,NTRK1,PHF11,PSMD8,PTGER4,PTPRE,PTPRU,PXN,RCAN3,RPA3,RPTOR,RTN2,SEMA5A,SFXN1,SH2D2A,STX12,TBXAS1,TMCC1,TRAP1,UBE4A,VAMP5,WIF1,WWOX	47 (34)	29
HVCN1		ion channel	CCND1,CEBPB,Creb,DUSP1,EIF4E,ERK,ERK1/2,GSK3B,HVCN1,IRF7,MTOR,NFkB (complex),NOS2,Notch,PLA2G4A,PPARG,RELA,RXRA,STAT3	3		1.061	0.00111	0.0008	AHI1,AP3M2,CD82,CDC42EP3,CLEC4E,COBL,COPG2,DBP,INTS1,ISLR2,JPT1,LEF1,LEMD3,MAPT,MKI67,NOX5,NTRK1,PHF11,PTGER4,PTPRE,PXN,RPA3,RPTOR,SFXN1,SH2D2A,STX12,TBXAS1,TMCC1,UBE4A,VAMP5,WWOX,ZEB2	32 (19)	17
ROR2		kinase	APP,AR,Creb,CTNNB1,EGFR,EIF4E,FOXO1,IKBKB,IKK (complex),ITGB1,Jnk,MAP2K1,Map3k7,Mapk,MAPK1,MKNK1,MTOR,MYC,NFE2L2,NFkB (complex),PLA2G4A,PRKAA1,PRKAA2,PRKCD,Rac,RB1,RELA,RICTOR,ROR2,Smad2/3,SP1,SRC,STAT3,STAT5a/b,STAT6,SYK,TCF,TP53	3		-0.7	0.0011	0.0059	ANXA6,AP3M2,ATP5MC1,CAD,CDK5RAP3,CERS6,CHCHD3,CLEC4E,COBL,COPG2,COX7A2L,CSMD3,DBP,DLST,GABRA1,GHITM,ILDR2,INTS1,ISLR2,KCNQ3,KLHL29,KLHL31,LAMP1,LEF1,LEMD3,MAPT,mir-128,MRC2,MYO1D,NELL2,NOX5,NRSN1,PITRM1,PSMC3,PSMD8,PTGER4,PTPRU,PXN,RAD51C,RCAN3,RTN2,S100A13,SIDT1,SLC12A2,STX12,TMCC1,TMEM131,TRAP1,UBE4A,WIF1,ZNF608	51 (38)	34
SPHK1		kinase	Akt,AKT1,AR,Cdc42,CDKN1B,CEBPA,CHUK,CTNNB1,DUSP1,EIF4EBP1,ERBB2,ERK1/2,ESR1,EZH2,FLNA,FOXO1,GATA1,GLI1,GSK3B,IKBKB,IKK (complex),IRF3,ITGB1,LEF1,LIN28A,MAP2K7,MAPK1,MAPK3,MAPK8,MED1,MKNK1,MTOR,NFAT5,NFE2L2,NFkB (complex),NFKBIA,NRAS,P38 MAPK,PAK1,PAK2,PARP1,PPARG,PRKAA1,PTK2,RAC1,RARA,RB1,RICTOR,RPS6KB1,S1PR1,SIRT1,SMAD2,SPHK1,STAT3,SYK,TCF7L2,TFEB,TP73	3		0	0.00108	0.0105	ARL5C,CAPRIN2,CDC14B,CDK5RAP3,CHCHD3,CLEC4E,COBL,COPG2,COX7A2L,DBP,FAM186A,FUS,GABRA1,GHITM,HDGFL3,HECW2,IER3,ILDR2,ISLR2,JAZF1,KLHL29,KLHL31,KLK1,LAMP1,LEF1,LRCH1,MAP2K4,MKI67,MYO1D,NELL2,NMI,NOX5,NPR3,NRSN1,NTN4,PHF11,PITRM1,POU2F1,PTPRE,PXN,RAD51C,RCAN3,RPTOR,S100A13,SH2D2A,SIDT1,SMAD9,TBXAS1,TMCC1,TMEFF2,TRIM11,USP48,VAMP5,WIF1,ZEB2,ZNF366	56 (58)	43
SPAG9		other	APP,AR,CCND1,CEBPB,Creb,CREB1,DUSP1,EGFR,EIF4E,EP300,ERK,FOXO1,Hsp27,IKBKB,Jnk,JUN,KAT5,MET,MITF,MKNK1,MTOR,NFAT5,NFE2L2,NFkB (complex),NOS2,P38 MAPK,PLA2G4A,PPARGC1A,RB1,RELA,RICTOR,RXRA,Smad2/3,SP1,SPAG9,STAT3,STAT6,TCF,TP53	3		-1.236	0.00108	0.0092	AHI1,ANXA6,AP3M2,ATP5MC1,CAD,CD82,CDK5RAP3,CERS6,CHCHD3,CLEC4E,COBL,COPG2,COX7A2L,CSMD3,DBP,DLST,FOXK1,GABRA1,GHITM,HECW2,HNRNPU,IER3,ILDR2,INTS1,ISLR2,JPT1,KCNQ3,LEF1,LEMD3,MAPT,mir-128,MRC2,MYO1D,NELL2,NOX5,NRSN1,NTRK1,PHF11,PITRM1,PSMC3,PSMD8,PTGER4,RPA3,S100A13,SFXN1,SH2D2A,STX12,TMCC1,TMEM131,TRAP1,UBE4A,WWOX,ZNF608	53 (39)	38
CNR1		G-protein coupled receptor	AMPK,AR,CCND1,CEBPB,CNR1,Creb,CREB1,DUSP1,EIF4E,ERK,FOXO1,FOXO3,GATA1,IKBKB,INSR,Jnk,JUN,LIN28A,Mapk,MAPK1,MAPK14,MAPK3,MED1,MTOR,NFkB (complex),NOS2,NR3C1,PARP1,PPARG,PRKAA2,RARA,RB1,RELA,RICTOR,RXRA,SCD,Smad2/3,SP1,STAT3,STAT6,TCF,TP53,YAP1	3		0.927	0.00108	0.0076	AHI1,ANXA6,AP3M2,ATP5MC1,CDC42EP3,CDK5RAP3,CERS6,CHCHD3,CLEC4E,COBL,COPG2,COX7A2L,CSMD3,DBP,FAM186A,FUS,GHITM,GPR63,HECW2,HNRNPU,IGF2R,ILDR2,INTS1,ISLR2,JAZF1,JPT1,KCNQ3,KLHL29,LEF1,LEMD3,mir-128,MKI67,MRC2,MYO1D,NMI,NOX5,NTRK1,PHF11,PITRM1,POU2F1,PSMD8,PTGER4,PXN,RCAN3,RPA3,SFXN1,SH2D2A,STX12,TMCC1,TMEM131,TRAP1,UBE4A,VAMP5,WIF1,WWOX,ZNF366,ZNF608	57 (43)	39
PRNP		other	26s Proteasome,ADAM17,AKAP5,ATM,CASP8,CEBPA,CEBPB,CTNNB1,CXCR4,DUSP1,ERBB2,ERK1/2,EZH2,GATA1,IRF3,ITGB1,LEF1,LIN28A,MAPK1,MAPK3,MED1,MEF2D,MTOR,MYC,NFE2L2,PARP1,PDPK1,Pkc(s),PLA2G4A,PRKAA1,PRNP,RARA,RB1,SP1,SYK,TP53	3		0.962	0.00107	0.0091	ANKS1B,ANXA6,BLK,CDC14B,CERS6,CHCHD3,CSMD3,DBP,DLST,FAM186A,FUS,GABRA1,GHITM,HDGFL3,HECW2,ISLR2,JAZF1,JPT1,KCNQ3,KLHL29,KLHL31,LAMP1,LEF1,LEMD3,MAPT,mir-128,MKI67,NELL2,NMI,NOX5,NRSN1,NTN4,NTRK1,PHF11,POU2F1,PSMC3,PSMD8,PTPRE,PTPRU,RCAN3,RPA3,RPTOR,RTN2,S100A13,SH2D2A,SIDT1,STX12,TBXAS1,TMCC1,TRAP1,WIF1,ZEB2,ZNF366	53 (36)	30
ST6GAL1		enzyme	Akt,CASP8,CCND1,CD79A,CD79B,Cdc42,CDKN1B,Creb,EGFR,EP300,EZH2,FOXO1,FOXO3,IKZF3,IRF3,JAK3,LCP2,MTOR,NFAT5,PARP1,PLCG2,PPARGC1A,PRKCD,PTPRC,RB1,RELA,SP1,ST6GAL1,STAT3,STAT6,SYK,TP53,TSC2	3		-0.729	0.00106	0.0047	AHI1,ANXA6,AP3M2,ATP5MC1,CAD,CDK5RAP3,CERS6,CHCHD3,COBL,COPG2,CSMD3,DLST,GHITM,GPR63,HDGFL3,HECW2,INTS1,ISLR2,JPT1,KCNQ3,KLHL31,LAMP1,LEF1,LEMD3,MAPT,mir-128,NELL2,NOX5,POU2F1,PSMC3,PSMD8,PTGER4,PTPRE,PTPRU,PXN,RPA3,RPL7,RPTOR,SEMA5A,STX12,TMCC1,TMEFF2,TMEM131,TRAP1,WWOX,ZEB2,ZNF608	47 (33)	27
AFDN		other	AFDN,CDH1,CEBPA,CEBPB,Creb,CTNNB1,EGFR,EIF4E,ERK1/2,GATA1,IKBKB,ITGB1,Jnk,JUN,MAP2K1,Mapk,MAPK1,MED1,MKNK1,MTOR,NFkB (complex),P38 MAPK,PRKAA1,PRKCD,RB1,RELA,SP1,SRC,STAT3,STAT5a/b,STAT6,SYK	3		1.043	0.00104	0.0027	AP3M2,CAD,CD82,CHCHD3,CLEC4E,COBL,COPG2,DBP,DLST,GHITM,GPR63,HECW2,HNRNPU,INTS1,ISLR2,JAZF1,JPT1,KCNQ3,KLHL29,KLHL31,LAMP1,LEF1,LEMD3,MAPT,MKI67,MRC2,MYO1D,NELL2,NOX5,PHF11,PTGER4,PTPRE,PXN,RCAN3,RPA3,RPTOR,SIDT1,STX12,TBXAS1,TMCC1,TMEM131,UBE4A,WIF1,ZNF366,ZNF608	45 (32)	30
PTPRJ		phosphatase	ABL1,CCND1,CDH1,CEBPB,DUSP1,EGFR,ERK,ERK1/2,ESR1,FOXO1,GATA1,IKBKB,ITGB1,JUN,MED1,MET,MTOR,NOS2,PARP1,PPARG,PRKAA1,PTPRJ,RB1,RET,Sfk,SP1,SRC,STAT3,STAT6,SYK,TLR3,TP53,TP73,TYRO3	3		0.438	0.00103	0.0053	AHI1,ANXA6,ARL5C,ATP5MC1,CAD,CDK5RAP3,CERS6,CHCHD3,COBL,COPG2,CSMD3,FAM186A,GHITM,GLRX3,GPR63,HECW2,HNRNPU,IER3,IGF2R,ISLR2,JAZF1,JPT1,KCNQ3,KLHL29,KLHL31,LEF1,mir-128,MYO1D,NOX5,POU2F1,PSMD8,PTPRE,RPA3,RPL7,RPTOR,SFXN1,SH2D2A,SIDT1,STX12,TMCC1,TMEM131,TRAP1,VAMP5,WWOX,ZEB2,ZNF366,ZNF608	47 (34)	28
IL3RA		transmembrane receptor	CCND1,CEBPB,Creb,DUSP1,EIF4E,ERK,GAB2,GSK3B,IL3RA,MAPK1,MAPK14,MTOR,NFkB (complex),NOS2,Notch,PPARG,RELA,RXRA,STAT3,STAT5a/b,SYK	3		0.87	0.00101	0.001	AHI1,AP3M2,CD82,CDC42EP3,CLEC4E,COBL,COPG2,DBP,INTS1,ISLR2,JPT1,KLHL31,LEF1,LEMD3,MKI67,NMI,NOX5,NTRK1,PHF11,PTGER4,PXN,RCAN3,RPA3,SFXN1,SH2D2A,STX12,TBXAS1,TMCC1,UBE4A,VAMP5,WIF1,WWOX,ZEB2	33 (21)	18
FAT1		other	CAMK2,CDH1,Creb,CTNNB1,EGFR,EIF4E,FAT1,GATA1,IKBKB,ITGB1,Jnk,JUN,MAP2K1,Mapk,MAPK1,MKNK1,NFE2,NFkB (complex),P38 MAPK,PRKCD,RB1,RELA,SRC,STAT3,STAT5a/b,STAT6,SYK,YAP1	3		0.801	0.000999	0.0009	AP3M2,CAD,CD82,CDC42EP3,CHCHD3,CLEC4E,COBL,COPG2,DBP,DLST,GHITM,GPR63,HNRNPU,IER3,IGF2R,INTS1,JAZF1,KLHL31,LAMP1,LEF1,MAPT,MKI67,MRC2,MYO1D,NELL2,NOX5,PHF11,PTGER4,PXN,RCAN3,RPTOR,SIDT1,TBXAS1,TMEM131,UBE4A,WIF1,ZEB2,ZNF366,ZNF608	39 (28)	26
PRR7		other	APP,AR,CEBPA,CEBPB,Creb,CTNNB1,ERK1/2,FOXO1,GATA1,IKBKB,Jnk,JUN,LAT,LCP2,Mapk,MAPK1,MAPK14,MED1,MTOR,NCL,NFE2L2,NFkB (complex),PLA2G4A,PLCG1,PLCG2,PRKAA1,PRR7,RELA,RICTOR,Smad2/3,SP1,STAT3,STAT6,TP53,ZAP70	3		1.26	0.000993	0.0052	ANXA6,AP3M2,ATP5MC1,CDK5RAP3,CERS6,CLEC4E,COBL,COPG2,COX7A2L,CSMD3,DBP,DLST,GABRA1,GPR63,HECW2,HNRNPU,ILDR2,INTS1,ISLR2,JAZF1,JPT1,KCNQ3,KLHL29,LAMP1,LEMD3,MAPT,mir-128,MRC2,MYO1D,NMI,NOX5,NRSN1,PITRM1,PSMC3,PSMD8,PTGER4,PTPRE,PTPRU,PXN,RCAN3,RPA3,S100A13,STX12,TBXAS1,TMCC1,TMEM131,TRAP1,UBE4A,WIF1,ZNF366,ZNF608	51 (35)	31
BDNF		growth factor	Akt,BDNF,CCND1,CDKN1B,CEBPB,Creb,CREB1,DUSP1,EIF4E,ERK,ERK1/2,EZH2,FOXO1,GATA1,GSK3A,GSK3B,Hsp27,IKBKB,IKK (complex),ITGB1,Jnk,KRAS,MAPK1,MED1,MKNK1,MTOR,MYC,NFAT5,NFkB (complex),NFKBIA,NOS2,NRAS,NTRK1,NTRK2,PI3K (complex),PPARG,PRKAA1,RB1,RELA,RXRA,SP1,SRC,STAT3,STAT6,SYK,TSC2	3		-0.7	0.000981	0.007	AHI1,AP3M2,CAMK1,CD82,CDC42EP3,CDK5RAP3,CHCHD3,COBL,COPG2,DBP,GHITM,HDGFL3,HECW2,IER3,INTS1,ISLR2,JAZF1,JPT1,KCNQ3,KLHL29,KLHL31,LEF1,LEMD3,MRC2,MYO1D,NELL2,NOX5,NPR3,NTRK1,PSMC3,PTGER4,PTPRE,PXN,RAD51C,RCAN3,RPA3,RTN2,SFXN1,SH2D2A,SIDT1,SLC12A2,STX12,TMCC1,TMEFF2,TMEM131,TRIM11,UBE4A,VAMP5,WWOX,ZNF366,ZNF608	51 (46)	37
ITGB4		transmembrane receptor	Akt,CCND1,CDKN1B,Creb,EIF4E,EP300,EZH2,FOXO1,FOXO3,Hsp27,IKBKB,ITGB1,ITGB4,JUN,KRAS,Mapk,MAPK1,MET,MKNK1,MTOR,NFAT5,NOS2,NRAS,PAK2,PARP1,PI3K (complex),PPARGC1A,PTEN,PTK2,RAC1,RB1,RELA,RXRA,SP1,SRC,STAT3,STAT6,SYK,TP53,TP63	3		-0.714	0.000981	0.006	AHI1,ANXA6,AP3M2,CAMK1,CDK5RAP3,CERS6,CHCHD3,COBL,COPG2,CSMD3,DBP,GHITM,GPR63,HDGFL3,HECW2,HNRNPU,INTS1,ISLR2,JPT1,KCNQ3,KLHL31,LEF1,LEMD3,MAPT,mir-128,MYO1D,NELL2,NPR3,NTRK1,POU2F1,PSMD8,PTGER4,PTPRU,RCAN3,RPA3,RPL7,SFXN1,SIDT1,SMAD9,STX12,TMCC1,TMEFF2,TMEM131,TRAP1,TRIM11,UBE4A,WWOX,ZEB2,ZNF608	49 (40)	34
IRAK4		kinase	CCND1,CEBPB,CHUK,Creb,DUSP1,EGFR,EIF4E,ERK,ERK1/2,FOXO1,GATA1,GLI1,IKBKB,IKK (complex),IRAK4,IRF7,Jnk,LIN28A,MAP3K7,MAPK1,MAPK14,MED1,MITF,MKNK1,MTOR,NFAT5,NFE2L2,NFkB (complex),NFKBIA,NOS2,P38 MAPK,PARP1,PPARGC1A,PRKAA1,RARA,RB1,RELA,RICTOR,RPS6KA5,SP1,STAT3,STAT6,TP73	3		-0.816	0.000961	0.0083	AHI1,AP3M2,ARL5C,CAD,CAPRIN2,CD82,CDK5RAP3,CHCHD3,CLEC4E,COBL,COPG2,COX7A2L,DBP,FAM186A,FUS,GABRA1,GHITM,HECW2,IER3,INTS1,ISLR2,JAZF1,JPT1,KCNQ3,KLHL29,KLK1,LEMD3,MAPT,MKI67,MRC2,MYO1D,NELL2,NMI,NOX5,NRSN1,POU2F1,PTGER4,PTPRE,PXN,RAD51C,RCAN3,RPA3,RPTOR,SFXN1,SH2D2A,STX12,TMCC1,TMEM131,UBE4A,USP48,WIF1,WWOX,ZNF366,ZNF608	54 (43)	37
IRF8		transcription regulator	APP,AR,ASAH1,CCND1,CEBPB,Creb,CSF1R,CTNNB1,DUSP1,EIF4E,ERK,ERK1/2,estrogen receptor,FOXO1,GATA1,IKBKB,IKK (complex),IRF8,Jnk,JUN,MAPK1,MED1,MTOR,NFE2L2,NFkB (complex),NOS2,PPARG,PRKAA1,RELA,RICTOR,RXRA,Smad2/3,SP1,STAT1,STAT6,TCF,TP53	3		-0.405	0.000958	0.0066	AHI1,ANXA6,AP3M2,ATP5MC1,CDK5RAP3,CERS6,CLEC4E,COX7A2L,CSMD3,DBP,DLST,GABRA1,GPR63,HECW2,HNRNPU,IER3,ILDR2,INTS1,ISLR2,JAZF1,JPT1,KCNQ3,KLHL29,LEF1,LEMD3,MAPT,mir-128,MRC2,MYO1D,NRSN1,NTRK1,PHF11,PITRM1,PSMC3,PSMD8,PTGER4,PTPRE,PTPRU,PXN,RAD51C,RCAN3,RPA3,S100A13,SFXN1,SH2D2A,STX12,TMCC1,TMEM131,TRAP1,UBE4A,VAMP5,WIF1,WWOX,ZNF366,ZNF608	55 (37)	33
NME1		kinase	Akt,Cdc42,CDKN1B,CEBPA,Creb,EGFR,EP300,estrogen receptor,EZH2,FOXO1,FOXO3,IKBKB,IKK (complex),IRF3,Jnk,JUN,MAPK1,MTOR,NFAT5,NFkB (complex),NME1,PARP1,PPARGC1A,RB1,RELA,SP1,STAT3,STAT6,TP53,TSC2	3		0.283	0.000945	0.0041	ANXA6,AP3M2,ATP5MC1,CAD,CDK5RAP3,CERS6,CHCHD3,CLEC4E,COBL,COPG2,CSMD3,DBP,DLST,GHITM,HDGFL3,HECW2,HNRNPU,IER3,IGF2R,INTS1,ISLR2,KCNQ3,LAMP1,LEMD3,MAPT,mir-128,MRC2,MYO1D,NELL2,NMI,POU2F1,PSMC3,PSMD8,PTGER4,PTPRE,PTPRU,PXN,RAD51C,RCAN3,RPA3,RPL7,RPTOR,STX12,TBXAS1,TMCC1,TMEFF2,TMEM131,TRAP1,ZEB2,ZNF608	50 (30)	28
Igkv1-117		other	APP,AR,CEBPA,CEBPB,Creb,CREB1,CTNNB1,EGFR,EIF4E,EP300,ERK1/2,estrogen receptor,FOXO1,GATA1,Hsp27,Igkv1-117,IKBKB,IKK (complex),Jnk,JUN,KAT5,MED1,MET,MITF,MKNK1,MTOR,NFAT5,NFE2L2,NFkB (complex),P38 MAPK,PLA2G4A,PPARG,PPARGC1A,PRKAA1,RB1,RELA,RICTOR,Smad2/3,SP1,STAT3,STAT6,TCF,TP53	3		1.192	0.000942	0.0071	ANXA6,AP3M2,ATP5MC1,CAD,CD82,CDK5RAP3,CERS6,CHCHD3,CLEC4E,COBL,COPG2,COX7A2L,CSMD3,DBP,DLST,GABRA1,GHITM,HECW2,HNRNPU,IER3,ILDR2,INTS1,ISLR2,JAZF1,JPT1,KCNQ3,KLHL29,LEF1,LEMD3,MAPT,mir-128,MRC2,MYO1D,NELL2,NOX5,NRSN1,NTRK1,PHF11,PITRM1,PSMC3,PSMD8,PTGER4,PTPRE,PXN,RAD51C,RPA3,S100A13,STX12,TBXAS1,TMCC1,TMEM131,TRAP1,UBE4A,VAMP5,WIF1,ZNF366,ZNF608	57 (43)	42
RGS5		enzyme	CCND1,CEBPB,Creb,DUSP1,EIF4E,ERK,ERK1/2,GSK3B,MTOR,NFkB (complex),NOS2,Notch,PLA2G4A,PPARG,RELA,RGS5,RXRA,STAT3,STAT6,VASP	3		-1.567	0.000902	0.0011	AHI1,AP3M2,CD82,CDC42EP3,CLEC4E,COBL,COPG2,DBP,IGF2R,INTS1,ISLR2,JPT1,LEF1,LEMD3,MAPT,MKI67,NOX5,NTRK1,PTGER4,PTPRE,PXN,RPA3,SFXN1,SH2D2A,STX12,TBXAS1,TMCC1,TMEM131,UBE4A,VAMP5,WWOX,ZEB2,ZNF608	33 (20)	17
NPC2		transporter	CEBPA,CEBPB,Creb,CTNNB1,DUSP1,EGFR,ERK1/2,GATA1,GSK3B,LIN28A,MAPK1,MAPK14,MED1,MTOR,NPC2,PARP1,PRKAA1,RARA,RELA,SP1,STAT3,TP53	3		-1.342	0.000895	0.0029	ANXA6,AP3M2,ATP5MC1,CAD,CD82,CERS6,COPG2,CSMD3,DLST,FAM186A,FUS,GPR63,HECW2,INTS1,ISLR2,JAZF1,JPT1,KCNQ3,KLHL29,LEF1,LEMD3,MAPT,mir-128,MKI67,NELL2,NMI,NOX5,NTRK1,PHF11,POU2F1,PSMD8,PTGER4,PTPRE,PTPRU,PXN,RCAN3,RPA3,RPL7,SH2D2A,STX12,TBXAS1,TMCC1,TRAP1,WIF1,ZNF366	45 (22)	22
DAPP1		other	APP,AR,CCND1,CDKN1B,CEBPB,Creb,DAPP1,DUSP1,EGFR,EIF4E,ERBB2,ERK,FOXO1,IKBKB,Jnk,JUN,MAP2K1,MAP2K1/2,MAPK1,MKNK1,MTOR,NFE2L2,NFkB (complex),NOS2,Notch,NR4A1,PPARG,PRKAA1,RARA,RELA,RICTOR,RXRA,Smad2/3,SP1,STAT3,STAT6,STK11,TP53	3		-0.544	0.000893	0.0073	AHI1,ANXA6,AP3M2,CAD,CDC14B,CDK5RAP3,CERS6,COBL,COPG2,COX7A2L,CSMD3,DBP,DLST,FAM186A,GABRA1,GPR63,HNRNPU,ILDR2,INTS1,ISLR2,JPT1,KCNQ3,KLHL29,LAMP1,MAPT,mir-128,MRC2,MYO1D,NELL2,NOX5,NRSN1,NTRK1,PITRM1,PSMC3,PSMD8,PTGER4,PTPRU,PXN,RCAN3,RPA3,S100A13,SFXN1,SH2D2A,STX12,TBXAS1,TMCC1,TMEFF2,TMEM131,TRAP1,UBE4A,VAMP5,WWOX,ZEB2,ZNF608	54 (38)	35
NADPH oxidase		complex	Cdc42,CEBPA,Creb,CREB1,CTNNB1,EGFR,EGR1,estrogen receptor,FOXO1,IKBKB,IKK (complex),ITGB1,Jnk,JUN,KDM1A,KDM5A,KDM5B,MAPK1,MAPK14,NADPH oxidase,NFkB (complex),PARP1,RELA,SP1,STAT3,STAT6,TP53,YES1	3		0.577	0.000886	0.0023	ANXA6,AP3M2,ATP5MC1,BBS9,CAD,CDK5RAP3,CERS6,CHCHD3,CLEC4E,COBL,COPG2,CSMD3,DBP,DLST,FOXN4,GHITM,GPR63,HNRNPU,IER3,IGF2R,INTS1,KCNQ3,LAMP1,LEMD3,MAPT,mir-128,MRC2,MYO1D,NELL2,NMI,NOX5,PHF11,POU2F1,PSMD8,PTGER4,PTPRE,PTPRU,PXN,RAD51C,RCAN3,RPL7,SIDT1,SLC12A2,TBXAS1,TMEM131,TRAP1,WIF1,ZNF608	48 (28)	26
TIMP1		cytokine	CCND1,CEBPB,Creb,DUSP1,EIF4E,ERK,FOXO1,IKBKB,IRF3,KRAS,LIN28A,MAP2K6,MAP2K7,MAPK1,MAPK14,MAPK3,MET,MTOR,NFAT5,NFE2L2,NOS2,NRAS,PAK2,PARP1,PI3K (complex),PPARG,PTK2,RARA,RB1,RELA,Smad2/3,SP1,TIMP1,TP53,TSC2	3		-0.277	0.000869	0.0063	AHI1,ANXA6,AP3M2,CAMK1,CDK5RAP3,CERS6,CHCHD3,CSMD3,DLST,FAM186A,FUS,GABRA1,GHITM,HECW2,INTS1,ISLR2,JPT1,KCNQ3,MAP2K4,MAPT,mir-128,MKI67,MYO1D,NELL2,NMI,NOX5,NPR3,NRSN1,PHF11,POU2F1,PSMC3,PSMD8,PTGER4,PTPRU,RCAN3,RPA3,RPL7,RPTOR,S100A13,SFXN1,SH2D2A,SMAD9,STX12,TBXAS1,TMCC1,TRAP1,TRIM11,UBE4A,VAMP5,WIF1,WWOX,ZEB2	52 (35)	29
PAG1		other	CDH1,CEBPA,CEBPB,EGFR,EIF4E,ERK1/2,Fcer1,GATA1,IKBKB,ITGB1,Jnk,JUN,LCP2,MAP2K1,MAPK1,MED1,MKNK1,MTOR,P38 MAPK,PAG1,PLA2G4A,PLCG2,PRKAA1,PRKCD,RAS,RB1,RHOA,SP1,SRC,STAT5a/b,STAT6,SYK,TP53	3		0.309	0.000869	0.0048	ANXA6,ATP5MC1,CAD,CD82,CERS6,CHCHD3,CSMD3,DLST,GHITM,HECW2,HNRNPU,IGF2R,ISLR2,JAZF1,JPT1,KCNQ3,KLHL29,KLHL31,LAMP1,LEMD3,mir-128,MRC2,MYO1D,NELL2,NOX5,PHF11,PSMD8,PTPRE,PTPRU,RCAN3,RPA3,RPL7,RPTOR,SIDT1,STX12,TBXAS1,TMCC1,TMEM131,TRAP1,UBE4A,ZNF366,ZNF608	42 (33)	28
KSR1		kinase	Akt,CCND1,CDKN1B,CEBPB,Creb,DUSP1,EIF4E,EP300,ERBB2,ERK,ERK1/2,EZH2,FOXO1,GATA1,IKBKB,IRF3,Jnk,JUN,KSR1,LIN28A,MAP2K1,MAPK1,MED1,MTOR,NFAT5,NFKBIA,NOS2,PARP1,PPARG,PPARGC1A,PRKAA1,RAF1,RARA,RELA,RXRA,SP1,STAT3,STK11,TP53,TSC2	3		-0.137	0.000866	0.0065	AHI1,ANXA6,AP3M2,ATP5MC1,CDC14B,CDK5RAP3,CERS6,COBL,COPG2,CSMD3,FAM186A,FUS,HDGFL3,HECW2,HNRNPU,IGF2R,INTS1,ISLR2,JAZF1,JPT1,KCNQ3,KLHL29,LAMP1,MAPT,mir-128,MKI67,MRC2,MYO1D,NELL2,NMI,NOX5,NTRK1,PHF11,POU2F1,PSMC3,PSMD8,PTGER4,PTPRE,PTPRU,RCAN3,RPA3,RPL7,RPTOR,SFXN1,SH2D2A,STX12,TMCC1,TMEFF2,TRAP1,UBE4A,VAMP5,WWOX,ZNF366	53 (40)	35
VAV		group	CCND1,CDH1,CEBPB,Creb,DUSP1,EGFR,EIF4E,EP300,ERK,IKBKB,IKK (complex),ITGB1,JUN,MAP2K7,Mapk,MAPK14,MKNK1,MTOR,NOS2,PPARG,PRKCD,PTK2B,RB1,RELA,RXRA,SP1,SRC,STAT3,STAT6,SYK,TP53,TSC2,VAV,YAP1	3		-1.131	0.000859	0.0042	AHI1,ANXA6,AP3M2,ATP5MC1,CAD,CDC42EP3,CERS6,CHCHD3,COBL,COPG2,CSMD3,DBP,DLST,GHITM,HNRNPU,IGF2R,INTS1,ISLR2,JPT1,KCNQ3,KLHL31,LAMP1,LEF1,LEMD3,MAP2K4,MAPT,mir-128,MYO1D,NELL2,NTRK1,PSMC3,PSMD8,PTGER4,RAD51C,RPA3,RPL7,RPTOR,SFXN1,SH2D2A,SIDT1,STX12,TBXAS1,TMCC1,TMEM131,TRAP1,UBE4A,VAMP5,WIF1,WWOX,ZNF608	50 (34)	30
CXCR3		G-protein coupled receptor	Akt,CaMKII,CDKN1B,CEBPB,CXCR3,CXCR4,DUSP1,EGFR,EIF4E,ELAVL1,EP300,ERK1/2,EZH2,FOXO1,GATA1,Hsp27,IKBKB,IKK (complex),ITGB1,Jnk,JUN,KAT5,KRAS,LIN28A,Mapk,MAPK1,MED1,Mek,MITF,MKNK1,MTOR,NADPH oxidase,NCL,NFAT5,NFkB (complex),NRAS,P38 MAPK,PARP1,PI3K (complex),Pkc(s),PPARGC1A,PRKAA1,RAF1,RARA,RELA,SP1,SRC,STAT3,STAT6,SYK,TP53,TSC2	3		-0.788	0.000856	0.0077	ANKS1B,ANXA6,AP3M2,ATP5MC1,CAD,CAMK1,CD82,CDK5RAP3,CERS6,CLEC4E,COBL,COPG2,CSMD3,DBP,FAM186A,FUS,HDGFL3,HECW2,HNRNPU,IER3,ISLR2,JAZF1,JPT1,KCNQ3,KLHL29,KLHL31,MAPT,mir-128,MKI67,MRC2,MYO1D,NELL2,NMI,NOX5,NPR3,NTRK1,PHF11,POU2F1,PSMC3,PSMD8,PTGER4,PTPRE,PTPRN2,RAD51C,RCAN3,RPA3,RPL7,SH2D2A,SIDT1,STX12,TMCC1,TMEFF2,TMEM131,TRAP1,TRIM11,UBE4A,ZNF366,ZNF608	58 (52)	44
SMO		G-protein coupled receptor	Akt,APP,CARD11,CCND1,CDKN1B,EGFR,EIF4E,EP300,EZH2,FOXO1,FOXO3,GLI2,IKBKB,IRF3,Jnk,KRAS,Mapk,MAPK1,MKNK1,MTOR,NCF1,NFAT5,NFE2L2,NFKB1,PPARG,PPARGC1A,PRKCB,RB1,RELA,RXRA,SHH,SMO,SP1,STAT3,TP53,TP73	3		-0.566	0.000843	0.0057	AHI1,ANXA6,AP3M2,ARL5C,ATP5MC1,CAD,CAMK1,CDK5RAP3,CERS6,CHCHD3,COBL,COPG2,CSMD3,DBP,DLST,GABRA1,GHITM,HDGFL3,HECW2,HYAL3,ISLR2,JPT1,KCNQ3,LEF1,LEMD3,MAPT,mir-128,MRC2,MYO1D,NELL2,NRSN1,NTRK1,PSMD8,PTGER4,PTPRU,PXN,RCAN3,RPA3,RPL7,RPTOR,S100A13,STX12,TBXAS1,TMCC1,TMEFF2,TRAP1,UBE4A,USP48,VAMP5,WWOX	50 (36)	30
Gαi/o		group	APP,AR,CAMK2A,CEBPA,CEBPB,Creb,CTNNB1,ERK1/2,FOXO1,GATA1,Gαi/o,IKBKB,Jnk,JUN,KRAS,MAPK1,MED1,MTOR,NCF1,NFE2L2,NFkB (complex),PLA2G4A,PRKAA1,PRKCB,RELA,RICTOR,Smad2/3,SP1,STAT3,STAT6,TCF,TP53,TP73	3		-1.109	0.000827	0.0046	ANXA6,AP3M2,ARL5C,ATP5MC1,CAMK1,CDK5RAP3,CERS6,CLEC4E,COBL,COPG2,COX7A2L,CSMD3,DLST,GABRA1,GPR63,HECW2,HNRNPU,HYAL3,ILDR2,INTS1,ISLR2,JAZF1,JPT1,KCNQ3,KLHL29,LEF1,LEMD3,MAPT,mir-128,MRC2,MYO1D,NOX5,NRSN1,NTRK1,PITRM1,PSMC3,PSMD8,PTGER4,PTPRE,PTPRU,PXN,RCAN3,RPA3,S100A13,STX12,TBXAS1,TMCC1,TMEM131,TRAP1,WIF1,ZNF366,ZNF608	52 (33)	30
ITGA2		transmembrane receptor	Akt,CCND1,CDKN1B,CEBPB,Creb,DUSP1,EIF4E,EP300,ERK,EZH2,Focal adhesion kinase,FOXO1,GPIIB-IIIA,IRF3,ITGA2,ITGB1,Jnk,JUN,MAPK1,MTOR,NANOG,NFAT5,NFkB (complex),NOS2,PI3K (family),PIK3CB,PPARG,PPARGC1A,PTK2B,RAP1B,RB1,RELA,RHOA,RXRA,SP1,STAT3,TP53,TSC2	3		0.577	0.000814	0.0029	AHI1,ANXA6,AP3M2,ATP5MC1,CDK5RAP3,CERS6,CHCHD3,CLEC4E,COBL,COPG2,CSMD3,FUS,GHITM,GPR63,HDGFL3,HECW2,HNRNPU,IGF2R,INTS1,ISLR2,JPT1,KCNQ3,MAPT,mir-128,MRC2,NMI,NTRK1,PHF11,PSMC3,PSMD8,PTGER4,PTPRU,PXN,RCAN3,RPA3,RPL7,RPTOR,SFXN1,SH2D2A,SIDT1,STX12,TBXAS1,TMCC1,TMEFF2,TRAP1,UBE4A,VAMP5,WWOX	48 (38)	29
TAP1		transporter	EGFR,HTT,IKBKB,IKK (complex),IRF3,Jnk,JUN,MAP2K7,MAP3K7,MAPK9,MTOR,NFKBIA,RELA,SREBF1,TAP1,TP53	3		-0.87	0.000809	0.0015	ANXA6,AP3M2,ATP5MC1,CAD,CDC42EP3,CERS6,CSMD3,DLST,GPR63,HNRNPU,IGF2R,ISLR2,LEF1,MAP2K4,MAPT,mir-128,MKI67,MRC2,MYO1D,NMI,PHF11,PSMD8,PTGER4,PTPRU,RAD51C,RPL7,RPTOR,S100A13,SLC12A2,STX12,TMCC1,TRAP1,ZEB2	33 (16)	13
WAS		other	CCND1,Cdc42,CEBPB,Creb,DUSP1,EIF4E,ERK,ERK1/2,GSK3B,Jnk,MTOR,NFkB (complex),NOS2,Notch,PLA2G4A,PPARG,RELA,RXRA,STAT3,WAS	3		-0.707	0.0008	0.0007	AHI1,AP3M2,CD82,CDC42EP3,CLEC4E,COBL,COPG2,DBP,INTS1,ISLR2,JPT1,LAMP1,LEF1,LEMD3,MAPT,MKI67,MRC2,NOX5,NTRK1,PTGER4,PTPRE,PXN,RPA3,SFXN1,SH2D2A,STX12,TBXAS1,TMCC1,UBE4A,VAMP5,WWOX,ZEB2	32 (20)	18
PRKG2		kinase	CCND1,CEBPB,Creb,DUSP1,EIF4E,ERK,ERK1/2,GSK3B,ITPR,MTOR,NFkB (complex),NOS2,Notch,PLA2G4A,PPARG,PRKG2,RELA,RXRA,SOX9,STAT3,STAT6,VASP	3		1.715	0.000774	0.0009	AHI1,AP3M2,CD82,CDC42EP3,CLEC4E,COBL,COPG2,DBP,IGF2R,INTS1,ISLR2,JPT1,LEF1,LEMD3,MAPT,MKI67,NOX5,NTRK1,PTGER4,PTPRE,PXN,RPA3,SFXN1,SH2D2A,STX12,TBXAS1,TMCC1,TMEM131,UBE4A,VAMP5,WIF1,WWOX,ZEB2,ZNF608	34 (22)	18
GDNF		growth factor	Akt,APP,AR,CDKN1B,CEBPA,CEBPB,Creb,DUSP1,EGFR,EP300,ERK1/2,ESR1,EZH2,GATA1,GDNF,Hsp27,IKBKB,IRF3,Jnk,JUN,KRAS,LIN28A,MAPK1,MED1,MTOR,NFAT5,NFE2L2,NOS2,NRAS,PARP1,PI3K (complex),PPARGC1A,PRKAA1,RAC1,RARA,RB1,RELA,RET,RICTOR,SP1,STAT3,STAT6	3		-1.98	0.000755	0.0045	AP3M2,CAD,CAMK1,CHCHD3,COBL,COPG2,COX7A2L,FAM186A,FUS,GABRA1,GHITM,HDGFL3,HECW2,HNRNPU,ILDR2,INTS1,ISLR2,JAZF1,JPT1,KCNQ3,KLHL29,MAPT,MKI67,MRC2,MYO1D,NELL2,NMI,NOX5,NPR3,NRSN1,NTRK1,PHF11,PITRM1,POU2F1,PTGER4,PTPRE,RCAN3,RPA3,RPTOR,S100A13,SFXN1,SH2D2A,STX12,TBXAS1,TMCC1,TMEFF2,TMEM131,TRIM11,ZNF366,ZNF608	50 (42)	37
HLA-DR		complex	CEBPA,CEBPB,Creb,CTNNB1,EGFR,ERK1/2,FCGR2B,FYN,GATA1,HLA-DR,IRF3,Jnk,JUN,LYN,MED1,MTOR,NFATC2,NFkB (complex),PLCG2,PRKAA1,RELA,SP1,STAT3,SYK,TP53	3		0.149	0.000749	0.0019	ANXA6,AP3M2,ATP5MC1,CAD,CD82,CERS6,CLEC4E,COBL,COPG2,CSMD3,DBP,DLST,GPR63,HECW2,HNRNPU,IGF2R,INTS1,ISLR2,JAZF1,JPT1,KCNQ3,KLHL29,KLHL31,LEF1,LEMD3,MAPT,mir-128,MRC2,NMI,NOX5,PHF11,PSMD8,PTGER4,PTPRE,PTPRU,PXN,RPA3,RPL7,RPTOR,STX12,TBXAS1,TMCC1,TRAP1,WIF1,ZNF366	45 (25)	23
TAC4		other	Akt,APP,AR,CCND1,CDKN1B,CEBPB,Creb,DUSP1,EIF4E,EP300,ERK,estrogen receptor,EZH2,GATA1,IKBKB,IKK (complex),IRF3,Jnk,JUN,MMP2,MTOR,NFAT5,NFE2L2,NFkB (complex),NOS2,PPARG,PPARGC1A,RB1,RELA,RICTOR,RXRA,Smad2/3,SP1,STAT3,STAT6,TAC4,TP53	3		-0.405	0.000743	0.0051	AHI1,ANXA6,AP3M2,ATP5MC1,CERS6,CHCHD3,CLEC4E,COBL,COPG2,COX7A2L,CSMD3,DBP,DLST,GABRA1,GHITM,HDGFL3,HECW2,HNRNPU,IER3,IGF2R,ILDR2,INTS1,ISLR2,JAZF1,JPT1,KCNQ3,LEF1,MAPT,mir-128,MRC2,MYO1D,NRSN1,NTRK1,PHF11,PITRM1,PSMD8,PTGER4,PTPRU,PXN,RAD51C,RPA3,RPTOR,S100A13,SFXN1,SH2D2A,STX12,TMCC1,TMEFF2,TMEM131,TRAP1,UBE4A,VAMP5,WWOX,ZNF366,ZNF608	55 (37)	33
POSTN		other	Akt,CCND1,Cdc42,CDKN1B,CEBPB,Creb,CREB1,DUSP1,EGFR,EIF4E,EP300,ERK,EZH2,Focal adhesion kinase,FOXO1,IGF1R,IRF3,IRF4,Jnk,JUN,Mapk,MAPK1,MTOR,MYD88,NANOG,NFAT5,NFkB (complex),NOS2,PAK2,PARP1,PI3K p85,POSTN,PPARG,PPARGC1A,PTK2,RB1,RELA,Smad2/3,SP1,STAT3,STAT6,TSC2	3		0.289	0.000727	0.0025	AHI1,AP3M2,ATP5MC1,CAD,CDK5RAP3,CHCHD3,CLEC4E,COBL,COPG2,DBP,DLST,FUS,GHITM,HDGFL3,HECW2,HNRNPU,IGF2R,INTS1,ISLR2,JPT1,KCNQ3,LAMP1,MAPT,mir-128,MKI67,MRC2,NELL2,NMI,POU2F1,PSMC3,PTGER4,PTPRE,RCAN3,RPA3,RPTOR,SFXN1,SH2D2A,SMAD9,STX12,TBXAS1,TMCC1,TMEFF2,TMEM131,UBE4A,VAMP5,WWOX,ZEB2,ZNF608	48 (42)	36
TP73-AS1		other	Creb,ELAVL1,ESR1,FOXO1,FOXO3,GSK3B,HMGA1,IRF3,MTOR,NCL,NFkB (complex),P38 MAPK,PI3K (family),PPARGC1A,RELA,RICTOR,SIRT1,SP1,SREBF1,STAT5a/b,SYK,TFEB,TP53,TP73-AS1	3		0.781	0.000715	0.0025	ANXA6,AP3M2,ATP5MC1,CD82,CDC42EP3,CDK5RAP3,CERS6,CLEC4E,COX7A2L,CSMD3,DBP,DLST,FAM186A,GPR63,INTS1,ISLR2,KCNQ3,KLHL31,LAMP1,LEF1,LEMD3,LRCH1,MAPT,mir-128,NOX5,NTRK1,PSMC3,PSMD8,PTGER4,PTPRN2,PTPRU,PXN,RPA3,RPTOR,S100A13,SFXN1,SLC12A2,STX12,TMCC1,TRAP1,UBE4A	41 (24)	23
NOS2		enzyme	BAX,Cdc42,CEBPA,CEBPB,Creb,EIF4E,EIF4EBP1,ESR1,FOXO1,GJA1,GSK3B,IKBKB,IKK (complex),IRF3,ITGB2,Jnk,MAPK14,MAPT,MMP9,MPO,MTOR,MYC,NFE2L2,NFkB (complex),NOS2,PRKAA2,RB1,RELA,RICTOR,SP1,STAT6,TCF,TFEB,TLR3	3		-0.745	0.000708	0.003	AP3M2,CAD,CD82,CDC42EP3,CDK5RAP3,CHCHD3,CLEC4E,COX7A2L,DBP,FAM186A,GABRA1,GHITM,GLRX3,HNRNPU,IER3,INTS1,ISLR2,JPT1,KCNQ3,KLHL29,LAMP1,LEF1,LEMD3,MAPT,MRC2,MYO1D,NRSN1,NTRK1,PSMC3,PTGER4,PXN,RAD51C,RPA3,RPTOR,RTN2,S100A13,SFXN1,SLC12A2,STX12,TBXAS1,TMCC1,TMEM131,UBE4A,WIF1,ZNF608	45 (34)	27
RASGRP1		other	Akt,APP,AR,CCND1,CDKN1B,CEBPB,Creb,CREB1,DUSP1,EGFR,EIF4E,EP300,ERK,ERK1/2,EZH2,GATA1,HRAS,HSF1,IKBKB,INSR,IRF3,Jnk,JUN,KRAS,LIN28A,MAPK1,MAPK3,MAPK9,MED1,MTOR,NFAT5,NOS2,NRAS,PARP1,PPARG,PPARGC1A,PRKAA1,RARA,RASGRP1,RB1,RELA,RICTOR,RXRA,Smad2/3,SP1,STAT3,STAT6,TP53	3		-1.692	0.000703	0.0081	AHI1,ANXA6,AP3M2,ATP5MC1,CAD,CAMK1,CERS6,CHCHD3,COBL,COPG2,COX7A2L,CSMD3,DLST,FAM186A,FUS,GHITM,HDGFL3,HECW2,HNRNPU,ILDR2,INTS1,ISLR2,JAZF1,JPT1,KCNQ3,KLHL29,LAMP1,MAPT,mir-128,MKI67,MRC2,MYO1D,NELL2,NOX5,NPR3,NTRK1,PHF11,PITRM1,POU2F1,PSMD8,PTGER4,PTPRE,PTPRU,RCAN3,RPA3,RPTOR,SFXN1,SH2D2A,STX12,TMCC1,TMEFF2,TMEM131,TRAP1,TRIM11,UBE4A,VAMP5,WWOX,ZNF366,ZNF608	59 (48)	42
CERT1		kinase	CCND1,CEBPB,CERT1,Creb,CREB1,CTNNB1,DUSP1,EGFR,EIF4E,ERBB2,ERK,ESR1,FOXO1,Jnk,JUN,Mapk,MAPK1,MAPK14,MTOR,MXD1,NFkB (complex),NOS2,PARP1,PI3K (family),PPARG,RB1,RELA,RXRA,SP1,STAT3,STAT6	3		-1.443	0.000694	0.0029	AHI1,AP3M2,CAD,CDC14B,CDC42EP3,CDK5RAP3,CHCHD3,CLEC4E,COBL,COPG2,COX7A2L,DBP,DLST,FAM186A,GHITM,GPR63,HNRNPU,IGF2R,INTS1,ISLR2,JPT1,KCNQ3,LAMP1,MAPT,MKI67,MRC2,NELL2,NMI,NTRK1,PHF11,POU2F1,PTGER4,PTPRE,PXN,RCAN3,RPA3,SFXN1,SH2D2A,STX12,TBXAS1,TMCC1,TMEM131,UBE4A,VAMP5,WIF1,WWOX,ZEB2,ZNF608	48 (31)	29
SCD5		enzyme	Akt,CCND1,Cdc42,CDKN1B,CEBPB,Creb,CREB1,DUSP1,EGFR,EIF4E,EP300,ERK,EZH2,FOXO1,IRF3,Jnk,JUN,Mapk,MAPK1,MTOR,NFAT5,NFkB (complex),NOS2,PARP1,PI3K (family),PPARG,PPARGC1A,RB1,RELA,RXRA,SCD5,SP1,STAT3,STAT6,TSC2	3		0.146	0.000686	0.0023	AHI1,AP3M2,CAD,CDK5RAP3,CHCHD3,CLEC4E,COBL,COPG2,DBP,DLST,GHITM,GPR63,HDGFL3,HECW2,HNRNPU,IGF2R,INTS1,ISLR2,JPT1,KCNQ3,LAMP1,MAPT,MKI67,MRC2,NELL2,NMI,NTRK1,POU2F1,PSMC3,PTGER4,PTPRE,PXN,RCAN3,RPA3,RPTOR,SFXN1,SH2D2A,STX12,TBXAS1,TMCC1,TMEFF2,TMEM131,UBE4A,VAMP5,WWOX,ZEB2,ZNF608	47 (35)	32
TRAF3IP3		other	APP,CCND1,CEBPB,CXCR4,DUSP1,EIF3A,EIF4E,ELAVL1,ERK,ERK1/2,FOXO1,GATA1,GLI1,IKBKB,IKK (complex),IRF3,Jnk,MED1,Mek,MTOR,NCL,NFE2L2,NFkB (complex),PPARG,PRKAA1,RB1,RELA,RPS6KB1,SP1,STAT3,STAT6,TCF7L2,TP73,TRAF3IP3	3		-0.447	0.000665	0.0029	AHI1,ANKS1B,AP3M2,ARL5C,CAPRIN2,CDK5RAP3,CHCHD3,CLEC4E,COBL,COPG2,GABRA1,GHITM,HECW2,ISLR2,JAZF1,JPT1,KCNQ3,KLHL29,KLK1,LAMP1,LEF1,LEMD3,MAPT,MKI67,MRC2,MYO1D,NRSN1,PTGER4,PTPRE,PTPRN2,PXN,RAD51C,RPA3,RPTOR,S100A13,SH2D2A,STX12,TMCC1,TMEM131,UBE4A,USP48,VAMP5,WWOX,ZNF366,ZNF608	45 (34)	31
TXK		kinase	CCND1,CEBPB,Creb,CTNNB1,DUSP1,EGFR,EP300,ERK,ERK1/2,GATA1,Hsp27,IKBKB,JUN,KAT5,LIN28A,Mapk,MAPK1,MAPK14,MAPK3,MED1,MET,MITF,MKNK1,MTOR,NFAT5,NFE2L2,NFkB (complex),NOS2,P38 MAPK,PARP1,PLCG1,PPARGC1A,PRKAA1,RARA,RB1,RELA,RXRA,SP1,STAT3,TP53,TXK	3		-0.802	0.000664	0.0046	AHI1,ANXA6,AP3M2,ATP5MC1,CAD,CD82,CERS6,CHCHD3,CLEC4E,COBL,COPG2,CSMD3,DBP,DLST,FAM186A,FUS,GABRA1,GHITM,HECW2,HNRNPU,IER3,IGF2R,INTS1,ISLR2,JAZF1,JPT1,KCNQ3,KLHL29,LEF1,LEMD3,MAPT,mir-128,MKI67,MYO1D,NELL2,NMI,NOX5,NRSN1,NTRK1,PHF11,POU2F1,PSMC3,PSMD8,PTGER4,PTPRE,RCAN3,RPA3,RPL7,S100A13,SFXN1,SH2D2A,STX12,TMCC1,TRAP1,WWOX,ZNF366	56 (41)	37
L-type Calcium Channel		complex	CCND1,CEBPB,Creb,CREB1,CTNNB1,DUSP1,EGFR,EIF4E,ELAVL1,ERK,ERK1/2,ESR1,GATA1,H/K/NRAS,IKBKB,IKK (complex),INSR,Jnk,JUN,L-type Calcium Channel,MAPK1,MED1,MTOR,NFkB (complex),NOS2,PLA2G4A,PPARG,PRKAA1,PRKCA,RB1,RELA,RXRA,SP1,STAT3,TP73	3		0.577	0.000662	0.0021	AHI1,AP3M2,ARL5C,ATP5MC1,CAD,CERS6,CHCHD3,CLEC4E,COBL,COPG2,DLST,FAM186A,GHITM,GPR63,HECW2,HNRNPU,IGF2R,INTS1,ISLR2,JAZF1,JPT1,KCNQ3,KLHL29,LEF1,LEMD3,MAPT,MKI67,MRC2,MYO1D,NOX5,NTRK1,PHF11,PTGER4,PTPRE,PTPRN2,PXN,RAD51C,RCAN3,RPA3,SFXN1,SH2D2A,STX12,TMCC1,UBE4A,VAMP5,WIF1,WWOX,ZNF366	48 (35)	31
IGF2		growth factor	Akt,AR,CCND1,CDKN1B,CEBPB,Creb,CYP19A1,DUSP1,EIF4E,ERK,ESR1,EZH2,Focal adhesion kinase,GATA1,IGF1R,IGF2,IKBKB,INSR,IRF3,Jnk,JUN,LIN28A,Mapk,MAPK1,MAPK3,MKNK1,MTOR,MYC,NANOG,NFAT5,NOS2,PARP1,PPARGC1A,PRKAA1,PRKAA2,RARA,RB1,RELA,RICTOR,RXRA,SIRT1,SP1,STAT3,STAT5B,STAT6	3		0	0.000652	0.0034	AHI1,ANKS1B,AP3M2,ATP5MC1,CERS6,CHCHD3,COBL,COPG2,COX7A2L,DBP,DIP2B,FAM186A,FUS,GHITM,HDGFL3,HECW2,HNRNPU,IGF2R,ILDR2,INTS1,ISLR2,JAZF1,JPT1,KCNQ3,KLHL29,LRCH1,MAPT,MKI67,MRC2,MYO1D,NELL2,NMI,NOX5,NTRK1,PHF11,PITRM1,POU2F1,PTGER4,PXN,RCAN3,RPA3,RPTOR,RTN2,SFXN1,SH2D2A,SLC12A2,STX12,TMCC1,TMEFF2,TMEM131,UBE4A,WWOX,ZNF366,ZNF608	54 (45)	41
FRK		kinase	APP,AR,Cdc42,DUSP1,EGFR,FOXO1,FRK,GAB1,IKBKB,Jnk,JUN,LIN28A,Mapk,MAPK1,MAPK14,MET,MTOR,NFE2L2,NFkB (complex),NR3C1,NRAS,PAK2,PARP1,PTEN,PTK2,RARA,RICTOR,Smad2/3,SP1,STAT3,STAT6,TCF,TP53,YAP1	3		-0.14	0.00064	0.0039	ANXA6,CAD,CDC42EP3,CDK5RAP3,CERS6,CLEC4E,COBL,COPG2,COX7A2L,CSMD3,DBP,DLST,FAM186A,FUS,GABRA1,GPR63,HNRNPU,ILDR2,ISLR2,KCNQ3,LAMP1,LEF1,LEMD3,MAPT,mir-128,MKI67,MRC2,MYO1D,NELL2,NMI,NOX5,NPR3,NRSN1,NTRK1,PHF11,PITRM1,POU2F1,PSMD8,PTPRU,RCAN3,S100A13,SH2D2A,SLC12A2,SMAD9,STX12,TMCC1,TMEM131,TRAP1,TRIM11,WIF1,ZNF608	51 (34)	32
MAP3K11		kinase	APP,AR,BRAF,CCND1,CEBPB,Creb,CREB1,DUSP1,EGFR,EIF4E,EP300,ERK,ERK1/2,FOXO1,Hsp27,IKBKB,Jnk,JUN,KAT5,MAP3K11,Mapk,MAPK1,MAPK10,MED1,MITF,MKNK1,MTOR,NFAT5,NFE2L2,NFkB (complex),NOS2,P38 MAPK,PLA2G4A,PPARGC1A,PRKAA1,RB1,RELA,RICTOR,RXRA,Smad2/3,SP1,STAT3,STAT6,TCF,TP53	3		-1.336	0.000605	0.0068	AHI1,ANXA6,AP3M2,ATP5MC1,CAD,CD82,CDK5RAP3,CERS6,CHCHD3,CLEC4E,COBL,COPG2,COX7A2L,CSMD3,DBP,DLST,GABRA1,GHITM,HECW2,HNRNPU,IER3,IGF2R,ILDR2,INTS1,ISLR2,JPT1,KCNQ3,KLHL29,LEF1,LEMD3,MAPT,mir-128,MRC2,MYO1D,NELL2,NMI,NOX5,NRSN1,NTRK1,PITRM1,PSMC3,PSMD8,PTGER4,PTPRE,RCAN3,RPA3,S100A13,SFXN1,SH2D2A,STX12,TMCC1,TMEM131,TRAP1,UBE4A,WWOX,ZNF608	56 (45)	41
HTRA1		peptidase	Akt,CCND1,Cdc42,CDKN1B,Creb,CREB1,EGFR,EIF4E,EP300,EZH2,FOXO1,FOXO3,HTRA1,IRF3,Jnk,JUN,Mapk,MAPK1,MKNK1,MTOR,NFAT5,NFkB (complex),PARP1,PI3K (family),PPARGC1A,RB1,RELA,RXRA,SP1,STAT3,STAT6,TSC2	3		0.447	0.000598	0.0014	AHI1,AP3M2,CAD,CDC42EP3,CDK5RAP3,CHCHD3,CLEC4E,COBL,COPG2,DBP,DLST,GHITM,GPR63,HDGFL3,HECW2,HNRNPU,IGF2R,INTS1,ISLR2,JPT1,KCNQ3,LAMP1,LEMD3,MAPT,MKI67,MRC2,NELL2,NMI,NTRK1,POU2F1,PSMC3,PTGER4,PTPRE,PXN,RCAN3,RPA3,RPTOR,STX12,TMCC1,TMEFF2,TMEM131,UBE4A,WWOX,ZEB2,ZNF608	45 (32)	30
AGTR1		G-protein coupled receptor	AGTR1,Akt,AR,CCND1,Cdc42,CDKN1B,CEBPA,CEBPB,Creb,EGFR,EIF4E,ERK1/2,EZH2,GATA1,GNA11,GNAI1,GNAI3,GNAQ,IKBKB,IKK (complex),IRF3,Jnk,Mapk,MAPK1,MED1,MKNK1,MTOR,NFAT5,NFE2L2,NFkB (complex),OCLN,PARP1,PPARGC1A,PRKAA1,RB1,RELA,RICTOR,RPS6KA1,RXRA,SIRT1,Smad2/3,SP1,STAT3,TP53	3		-1.192	0.000575	0.004	AHI1,AP3M2,ATP5MC1,CAD,CERS6,CHCHD3,CLEC4E,COBL,COPG2,COX7A2L,CSMD3,DBP,DLST,GABRA1,GHITM,HDGFL3,HECW2,IER3,ILDR2,INTS1,ISLR2,JAZF1,JPT1,KCNQ3,KLHL29,LAMP1,LEF1,LRCH1,mir-128,MRC2,MYO1D,NELL2,NMI,NOX5,NRSN1,NTRK1,PITRM1,POU2F1,PSMD8,PTGER4,PTPRE,PTPRU,PXN,RAD51C,RCAN3,RPA3,RPTOR,S100A13,STX12,TBXAS1,TMCC1,TMEFF2,TRAP1,UBE4A,WWOX,ZEB2,ZNF366	57 (44)	37
PIK3R1		kinase	BTK,CCND1,Cdc42,Creb,CREB1,CTNNB1,DUSP1,EIF4E,ERK,ERK1/2,ERN1,ESR2,EZH2,FOXO1,GATA1,GLI1,IKBKB,IRF3,Jnk,KRAS,LEF1,MED1,MKNK1,MYC,NFATC4,NFE2L2,NFkB (complex),NOS2,NRAS,PI3K (complex),PIK3R1,PLCG2,PPARG,PRKAA1,PTEN,RB1,RICTOR,RPS6KB1,SIRT1,STAT3,STAT5B,SYK,TP73	3		0.535	0.000569	0.004	AHI1,ANKS1B,ARL5C,CAD,CAMK1,CAPRIN2,CDC42EP3,CDK5RAP3,CHCHD3,CLEC4E,COBL,COPG2,COX7A2L,DBP,DIP2B,GABRA1,GHITM,GPR63,HDGFL3,HECW2,INTS1,JAZF1,KLHL29,KLHL31,KLK1,LAMP1,LEF1,LEMD3,LRCH1,LRP1B,MAPT,MKI67,MRC2,MYO1D,NELL2,NOX5,NPR3,NRSN1,NTN4,NTRK1,PTPRE,RAD51C,RPTOR,RTN2,S100A13,SFXN1,SH2D2A,TOMM70,TRIM11,UBE4A,USP48,VAMP5,WIF1,WWOX,ZEB2,ZNF366	56 (43)	37
Retnla		other	APP,AR,BTK,CAMK2,CCND1,CEBPB,Creb,CREB1,DUSP1,EGFR,EIF4E,EP300,ERK,FOXO1,Hsp27,IKBKB,IKK (complex),ITGB1,Jnk,JUN,KAT5,Mapk,MAPK14,MITF,MKNK1,MTOR,NFAT5,NFE2L2,NFkB (complex),NOS2,P38 MAPK,PLA2G4A,PLCG2,PPARGC1A,RB1,RELA,Retnla,RICTOR,RXRA,Smad2/3,SP1,STAT3,STAT5a/b,STAT5B,STAT6,SYK,TP53	3		-1.457	0.000537	0.0047	AHI1,ANKS1B,ANXA6,AP3M2,ATP5MC1,CAD,CD82,CDK5RAP3,CERS6,CHCHD3,CLEC4E,COBL,COPG2,COX7A2L,CSMD3,DBP,DIP2B,DLST,GABRA1,GHITM,HECW2,HNRNPU,IER3,ILDR2,INTS1,ISLR2,JPT1,KCNQ3,KLHL31,LEMD3,MAPT,mir-128,MRC2,MYO1D,NELL2,NOX5,NRSN1,NTRK1,PHF11,PITRM1,PSMC3,PSMD8,PTGER4,RAD51C,RPA3,S100A13,SFXN1,SH2D2A,SIDT1,STX12,TMCC1,TMEM131,TRAP1,UBE4A,WIF1,WWOX,ZNF608	57 (47)	43
CD55		other	C3,CD55,ERK1/2,IRF3,Jnk,JUN,NFkB (complex),PARP1,RELA,SIRT1,STAT3,TP53	3		-1.029	0.000528	0.0005	ANXA6,AP3M2,ATP5MC1,CD82,CDC42EP3,CERS6,CLEC4E,COBL,COPG2,CSMD3,DBP,DLST,GPR63,HNRNPU,IER3,IGF2R,LEF1,LRCH1,MAPT,mir-128,MKI67,MRC2,NELL2,PHF11,POU2F1,PSMD8,PTGER4,PTPRE,PTPRU,PXN,RPL7,RPTOR,TRAP1,ZEB2	34 (12)	10
DUSP14		phosphatase	APP,AR,CCND1,CEBPB,Creb,DUSP1,DUSP14,EGFR,EIF4E,ERK,estrogen receptor,FOXO1,IKBKB,IKK (complex),IRF3,Jnk,JUN,MAP2K7,Map3k7,MAP3K7,MAPK14,MAPK9,MTOR,NFE2L2,NFkB (complex),NOS2,PLA2G4A,PPARG,PRKAA1,PRKAA2,RELA,RICTOR,Smad2/3,SP1,STAT3,STAT6,TAB1,TP53	3		0.137	0.000525	0.0034	AHI1,ANXA6,AP3M2,ATP5MC1,CAD,CDK5RAP3,CERS6,CLEC4E,COBL,COPG2,COX7A2L,CSMD3,DBP,GABRA1,GPR63,HNRNPU,IER3,ILDR2,INTS1,ISLR2,JPT1,KCNQ3,KLHL29,LEMD3,MAP2K4,MAPT,mir-128,MRC2,MYO1D,NMI,NOX5,NRSN1,PHF11,PITRM1,PSMC3,PSMD8,PTGER4,PTPRU,PXN,RAD51C,RPA3,RPTOR,SFXN1,SH2D2A,STX12,TMCC1,TMEM131,TRAP1,UBE4A,VAMP5,WIF1,WWOX,ZNF608	53 (38)	33
PELI2		enzyme	APP,AR,CCND1,CEBPB,Creb,DUSP1,EIF4E,ERK,FOXO1,IKBKB,IKBKE,IRAK1,Jnk,JUN,MAPK14,MTOR,NFE2L2,NOS2,Notch,PELI2,PLA2G4A,PPARG,RELA,RICTOR,RXRA,Smad2/3,SP1,STAT6,TCF,TP53,YAP1	3		-0.438	0.000513	0.004	AHI1,ANXA6,AP3M2,ATP5MC1,CDC42EP3,CDK5RAP3,CERS6,COX7A2L,CSMD3,DLST,GABRA1,GPR63,HNRNPU,ILDR2,INTS1,ISLR2,JPT1,KCNQ3,LEF1,LEMD3,MAPT,mir-128,MRC2,MYO1D,NOX5,NRSN1,NTRK1,PITRM1,PSMC3,PSMD8,PTGER4,PTPRU,RPA3,S100A13,SFXN1,SH2D2A,STX12,TBXAS1,TMCC1,TMEM131,TRAP1,UBE4A,VAMP5,WIF1,WWOX,ZEB2,ZNF608	47 (31)	28
KLRB1		transmembrane receptor	AR,CaMKII,CCND1,Cdc42,CEBPB,Creb,DUSP1,EGFR,EIF4E,ERK,FOXO1,IKBKB,IKK (complex),Jnk,JUN,KLRB1,NFE2L2,NOS2,Notch,PLA2G4A,PPARG,RELA,RICTOR,RXRA,Smad2/3,SMPD1,SP1,STAT3,STAT6,TCF,TP53,YAP1	3		-0.289	0.00051	0.0038	AHI1,ANXA6,AP3M2,ATP5MC1,CAD,CDC42EP3,CDK5RAP3,CERS6,COBL,COPG2,COX7A2L,CSMD3,DLST,GABRA1,GPR63,HNRNPU,ILDR2,INTS1,JPT1,KCNQ3,LAMP1,LEF1,LEMD3,mir-128,MRC2,MYO1D,NOX5,NRSN1,NTRK1,PHF11,PITRM1,PSMC3,PSMD8,PTGER4,PTPRU,RAD51C,RPA3,S100A13,SFXN1,SH2D2A,TBXAS1,TMEM131,TRAP1,UBE4A,VAMP5,WWOX,ZEB2,ZNF608	48 (32)	28
MAP3K2		kinase	AR,CEBPA,CEBPB,Creb,CTNNB1,EGFR,ERK1/2,EZH2,FOXO1,GATA1,IKBKB,INSR,IRF3,Jnk,LATS,LEF1,MAP3K2,MAPK7,MAPK8,MED1,MEF2C,MEF2D,MTOR,MYC,NFATC2,NFE2L2,NFkB (complex),PLA2G4A,PPARG,PRKAA1,PTGS2,RELA,RICTOR,SIRT1,Smad2/3,SP1,STAT3,STAT6,TCF7L2,TP53,YAP1	3		-1.722	0.000499	0.0043	ANXA6,AP3M2,ATP5MC1,BLK,CAD,CDC42EP3,CDK5RAP3,CERS6,CLEC4E,COBL,COPG2,COX7A2L,CSMD3,DLST,GABRA1,GPR63,HDGFL3,HECW2,ILDR2,INTS1,ISLR2,JAZF1,JPT1,KCNQ3,KLHL29,LAMP1,LEF1,LEMD3,LRCH1,mir-128,MRC2,MYO1D,NMI,NOX5,NRSN1,NTN4,PHF11,PITRM1,PSMC3,PSMD8,PTGER4,PTPRE,PTPRU,RPA3,RPTOR,RTN2,S100A13,STX12,TBXAS1,TMCC1,TMEM131,TRAP1,VAMP5,WIF1,ZEB2,ZNF366,ZNF608	57 (41)	37
Agtr1b		G-protein coupled receptor	Agtr1b,CCND1,DUSP1,EGFR,EIF4E,JUN,LIN28A,Mapk,MAPK1,MAPK14,MAPK3,MKNK1,NFE2L2,NFkB (complex),NR3C1,PARP1,RARA,RB1,RELA,RXRA,TP53	3		0.149	0.000489	0.001	AHI1,ANXA6,AP3M2,ATP5MC1,CAD,CDC42EP3,CERS6,CHCHD3,CLEC4E,COBL,CSMD3,DBP,DLST,FAM186A,FUS,GABRA1,GHITM,HNRNPU,IGF2R,JPT1,LEF1,MAPT,mir-128,MKI67,NELL2,NMI,NOX5,NRSN1,NTRK1,PHF11,POU2F1,PSMC3,PSMD8,PTGER4,PTPRE,PTPRU,PXN,RCAN3,RPL7,S100A13,SH2D2A,TRAP1,UBE4A,WIF1,WWOX	45 (21)	19
Calmodulin		group	AKAP5,Akt,Calmodulin,CaMKII,CCND1,Cdc42,CDKN1B,CEBPB,Creb,CREB1,DUSP1,EGFR,EIF4E,EP300,ERK,EZH2,FOXO1,IKK (complex),IRF3,Jnk,JUN,MAPK1,MTOR,NFAT5,NFATC2,NOS2,PARP1,PPARGC1A,RALA,RB1,RELA,RXRA,STAT3,STAT6,TP53,TSC2	3		-0.277	0.000481	0.0036	AHI1,ANXA6,AP3M2,ATP5MC1,CAD,CDK5RAP3,CERS6,CHCHD3,COBL,COPG2,CSMD3,GHITM,GPR63,HDGFL3,HECW2,HNRNPU,IGF2R,INTS1,ISLR2,JPT1,KCNQ3,LAMP1,MAPT,mir-128,MKI67,MRC2,NELL2,NMI,NOX5,NTRK1,POU2F1,PSMC3,PSMD8,PTGER4,PTPRE,PTPRU,RAD51C,RCAN3,RPA3,RPL7,RPTOR,SFXN1,SH2D2A,STX12,TMCC1,TMEFF2,TMEM131,TRAP1,UBE4A,WWOX,ZEB2,ZNF608	52 (36)	31
PTEN		phosphatase	Akt,AKT2,AMPK,AR,Cdc42,CDKN1B,CEBPA,CHEK1,CREB1,DUSP1,E2F3,EGFR,EIF4E,ELAVL1,ERBB3,ERK1/2,ESR1,EZH2,FOXO1,GATA1,Gsk3,HMGA1,IGF1R,IKBKB,ITGB1,ITK,Jnk,LIN28A,MAP2K1/2,MAP2K7,MAPK1,MAPK14,MED1,MKNK1,MTOR,MTORC1,NCF1,NCOA3,NFAT5,NFE2L2,Nr1h,P38 MAPK,PAK2,PARP1,PI3K (family),PIK3R1,PPARG,PRKAA1,PRKAA2,PTEN,PTK2,RAC1,RARA,RELA,RICTOR,RPS6KB1,SIRT1,SRC,SREBF1,STAT3,STAT5A,STAT5a/b,STAT5B,STAT6,SYK,TSC2	3		-0.124	0.000466	0.0053	ANKS1B,AP3M2,ATP5MC1,CAD,CDC42EP3,CDK5RAP3,CERS6,COBL,COPG2,COX7A2L,DIP2B,FAM186A,FUS,GABRA1,GPR63,HDGFL3,HECW2,HLA-DOB,HYAL3,ILDR2,ISLR2,JAZF1,KLHL29,KLHL31,LAMP1,LEF1,LEMD3,LRCH1,MAP2K4,MKI67,MRC2,MYO1D,NEAT1,NELL2,NMI,NOX5,NRSN1,NTRK1,PHF11,PITRM1,POU2F1,PSMC3,PTGER4,PTPRE,PTPRN2,PXN,RAD51C,RCAN3,S100A13,SFXN1,SH2D2A,SIDT1,SLC12A2,SMAD9,STX12,TBXAS1,TMCC1,TMEFF2,TMEM131,UBE4A,VAMP5,WIF1,ZEB2,Z…	65 (66)	48
PLCB3		enzyme	CCND1,CEBPB,Creb,DUSP1,EIF4E,ERK,HSF1,Hsp27,IKBKB,INSR,IRF3,Jnk,JUN,KRAS,Lfa-1,LIN28A,LYN,MAPK1,MAPK14,MAPK3,MAPK8,MAPK9,MET,MITF,MKNK1,MTOR,NFAT5,NFE2L2,NOS2,NRAS,P38 MAPK,PARP1,PLCB3,PPARGC1A,RARA,RB1,RELA,RXRA,SIRT1,SP1,STAT3,SYK,TP53	3		-0.927	0.000459	0.0043	AHI1,ANXA6,AP3M2,ATP5MC1,CAMK1,CD82,CERS6,CHCHD3,COBL,COPG2,CSMD3,DLST,FAM186A,FUS,GABRA1,GHITM,HECW2,HNRNPU,IER3,IGF2R,INTS1,ISLR2,JPT1,KCNQ3,KLHL31,LAMP1,LEF1,LEMD3,LRCH1,mir-128,MKI67,MRC2,MYO1D,NELL2,NOX5,NPR3,NRSN1,NTRK1,PHF11,POU2F1,PSMC3,PSMD8,PTGER4,RCAN3,RPA3,RPL7,RPTOR,S100A13,SFXN1,SH2D2A,STX12,TMCC1,TRAP1,TRIM11,UBE4A,WIF1,WWOX	57 (43)	36
ETV6-RUNX1		fusion gene/product	CCND1,CEBPB,Creb,DUSP1,EIF4E,ERK,ERK1/2,ETV6-RUNX1,GSK3B,IRF3,MTOR,NFkB (complex),NOS2,Notch,PLA2G4A,PPARG,RELA,RXRA,STAT3	3		-0.333	0.00045	0.0005	AHI1,AP3M2,BLK,CD82,CDC42EP3,CLEC4E,COBL,COPG2,DBP,IER3,INTS1,ISLR2,JPT1,LEF1,LEMD3,MAPT,MKI67,NMI,NOX5,NTRK1,PHF11,PTGER4,PTPRE,PXN,RPA3,RPTOR,SFXN1,SH2D2A,SLC33A1,STX12,TBXAS1,TMCC1,UBE4A,VAMP5,WWOX,ZEB2	36 (19)	18
CD28		transmembrane receptor	AKT1,AR,CCND1,CD28,CD3,CDK1,CDK2,CDKN1B,CEBPB,Creb,DUSP1,ELAVL1,ERBB2,ERK,ERK1/2,ESR1,EZH2,GATA1,Hsp27,IKBKB,IKK (complex),IRF3,ITGB1,ITK,Jnk,KDM1A,KDM5B,KRAS,LCK,LCP2,LIN28A,MAP2K7,MAPK1,MAPK14,MAPK8,MED1,MTOR,MTORC1,NCF1,NFAT5,NFE2L2,NFkB (complex),NFKB1,NOS2,NRAS,P38 MAPK,PAK2,PI3K (complex),PIK3CG,PIP5K1A,PLC gamma,PRKAA1,PRKACA,RAC1,RAC2,RAF1,RARA,RELA,RICTOR,RPS6KB1,RXRA,SMARCA4,SOX2,SP1,SR…	3		-1	0.000438	0.0045	AHI1,AP3M2,BBS9,CAMK1,CD82,CDC14B,CLEC4E,COBL,COPG2,COX7A2L,DBP,FAM186A,FOXN4,FUS,GABRA1,HDGFL3,HECW2,HYAL3,IER3,ILDR2,INTS1,ISLR2,JAZF1,JPT1,KCNQ3,KLHL29,LAMP1,MAP2K4,MAPT,MELTF,MKI67,MRC2,MYO1D,NOX5,NPR3,NRSN1,NTRK1,PHF11,PITRM1,PTGER4,PTPRE,PTPRN2,PXN,RAD51C,RCAN3,RPL7,RPTOR,S100A13,SEMA5A,SFXN1,SH2D2A,SIDT1,SLC12A2,SMAD9,STX12,TMCC1,TMEFF2,TMEM131,TRIM11,WIF1,WWOX,ZEB2,ZNF366,ZNF608	64 (68)	51
PF4		cytokine	APP,AR,CEBPA,CEBPB,Creb,CREB1,CTNNB1,EGFR,EIF4E,EP300,ERK1/2,GATA1,Hsp27,IKBKB,IKK (complex),IRF3,Jnk,JUN,KAT5,KRAS,MAP2K1,MAPK1,MED1,MET,MITF,MKNK1,MTOR,NFAT5,NFE2L2,NOS2,NRAS,P38 MAPK,PF4,PI3K (complex),PLA2G4A,PPARG,PPARGC1A,PRKAA1,RB1,RELA,RICTOR,Smad2/3,SP1,SPHK1,STAT3,STAT5a/b,STAT6,TCF,TP53	3		-1.838	0.000423	0.0044	ANXA6,AP3M2,ATP5MC1,CAD,CAMK1,CD82,CERS6,CHCHD3,COBL,COPG2,COX7A2L,CSMD3,DLST,GABRA1,GHITM,HECW2,HNRNPU,IER3,ILDR2,INTS1,ISLR2,JAZF1,JPT1,KCNQ3,KLHL29,LEF1,MAPT,mir-128,MRC2,MYO1D,NELL2,NMI,NOX5,NPR3,NRSN1,NTRK1,PITRM1,PSMC3,PSMD8,PTGER4,PTPRE,RAD51C,RCAN3,RPA3,RPTOR,S100A13,SFXN1,STX12,TBXAS1,TMCC1,TMEM131,TRAP1,TRIM11,UBE4A,VAMP5,WIF1,ZNF366,ZNF608	58 (49)	46
PLCG2		enzyme	AR,CCND1,CEBPB,Creb,CTNNB1,DUSP1,EGFR,EIF4E,ERK,ERK1/2,FOXO1,GAB2,GATA1,Hsp27,IKBKB,IKK (complex),IKKA/B,IRF3,ITGB1,Jnk,JUN,LIN28A,MAPK1,MAPK14,MED1,MET,MITF,MKNK1,MTOR,NFAT5,NFE2L2,NFkB (complex),NFKBIA,NOS2,P38 MAPK,PARP1,PIK3CB,PLCG2,PPARGC1A,PRKAA1,PRKCD,PTK2B,RARA,RB1,RELA,RICTOR,RXRA,SP1,SRC,STAT3,STAT6,TCF	3		-0.802	0.000422	0.0039	AHI1,AP3M2,CAD,CD82,CDK5RAP3,CHCHD3,CLEC4E,COBL,COPG2,COX7A2L,DBP,FAM186A,FUS,GABRA1,GHITM,HECW2,HNRNPU,IER3,ILDR2,INTS1,ISLR2,JAZF1,JPT1,KCNQ3,KLHL29,LAMP1,LEF1,LEMD3,MKI67,MRC2,MYO1D,NELL2,NOX5,NRSN1,NTRK1,PITRM1,POU2F1,PSMC3,PTGER4,PTPRE,PXN,RAD51C,RCAN3,RPA3,RPTOR,S100A13,SFXN1,SH2D2A,SIDT1,STX12,TMCC1,TMEM131,UBE4A,WWOX,ZNF366,ZNF608	56 (52)	45
TLR7		transmembrane receptor	APP,AR,CASP1,CCND1,CEBPB,Creb,CTNNB1,DUSP1,EIF4E,ERK,ERK1/2,estrogen receptor,FOXO1,GATA1,IKBKB,IKK (complex),IRF3,Jnk,MED1,MTOR,NFE2L2,NFkB (complex),NOS2,PPARG,PRKAA1,RELA,RICTOR,RXRA,Smad2/3,SP1,STAT3,STAT6,TBK1,TLR7,TP53	3		-0.535	0.000412	0.002	AHI1,ANXA6,AP3M2,ATP5MC1,CDK5RAP3,CERS6,CLEC4E,COBL,COPG2,COX7A2L,CSMD3,DBP,DLST,GABRA1,GPR63,HECW2,IER3,ILDR2,INTS1,ISLR2,JAZF1,JPT1,KCNQ3,KLHL29,LEF1,LEMD3,MAPT,mir-128,MRC2,MYO1D,NMI,NRSN1,NTRK1,PITRM1,PSMC3,PSMD8,PTGER4,PTPRE,PTPRU,PXN,RAD51C,RPA3,RPTOR,S100A13,SFXN1,SH2D2A,STX12,TMCC1,TMEM131,TRAP1,UBE4A,VAMP5,WIF1,WWOX,ZNF366,ZNF608	56 (35)	33
CXCL8		cytokine	Akt,Calcineurin protein(s),Cdc42,CDH5,CDKN1B,CEBPA,CEBPB,CXCL8,CXCR4,DUSP1,EGFR,EIF4E,ERBB2,ERK1/2,ESR1,EZH2,FOXO1,GATA1,IKBKB,IKK (complex),ITGAM,ITGB1,ITGB2,Jnk,LIN28A,MAPK1,MAPK3,MED1,MKNK1,MTOR,MYC,NFAT5,NFE2L2,PAK1,PAK2,PARP1,Pkc(s),PPARGC1A,PRKAA1,PRKCD,Rac,RARA,RB1,RELA,SRC,SYK,TP53,TSC2	3		-0.651	0.000406	0.0047	ANKS1B,ANXA6,AP3M2,ATP5MC1,CAD,CDC14B,CDK5RAP3,CHCHD3,CSMD3,DBP,DLST,FAM186A,FUS,GABRA1,GHITM,HDGFL3,HECW2,ISLR2,JAZF1,JPT1,KCNQ3,KLHL29,KLHL31,LAMP1,LEF1,mir-128,MKI67,MRC2,MYO1D,NELL2,NMI,NOX5,NRSN1,NTRK1,PHF11,POU2F1,PSMC3,PSMD8,PTGER4,PTPRE,PTPRU,PXN,RAD51C,RCAN3,RPA3,RPL7,RTN2,S100A13,SH2D2A,SIDT1,SMAD9,STX12,TBXAS1,TMCC1,TMEFF2,TRAP1,UBE4A,ZEB2,ZNF366	59 (48)	39
PRKN		enzyme	Akt,BAK1,BAX,Cdc42,CDKN1B,CEBPB,CREB1,EGFR,ERK1/2,EZH2,FOXO1,GATA1,GATA4,IKBKG,IKK (complex),IL1B,IRF3,IRF7,JUN,MAPK1,MED1,MTOR,NFAT5,NFkB (complex),PARP1,PPARGC1A,PRKAA1,PRKN,RB1,RELA,RIPK1,RIPK3,SP1,STAT3,STAT6,TP53,TSC2	3		1.109	0.000404	0.0018	ANXA6,AP3M2,ATP5MC1,CAD,CDC42EP3,CDK5RAP3,CERS6,CHCHD3,CLEC4E,COBL,COPG2,CSMD3,DBP,GHITM,GPR63,HDGFL3,HECW2,HNRNPU,IER3,IGF2R,ISLR2,JAZF1,JPT1,KCNQ3,KLHL29,LAMP1,LEF1,mir-128,MKI67,NEAT1,NELL2,NMI,POU2F1,PSMC3,PSMD8,PTGER4,PTPRE,PTPRU,PXN,RAD51C,RCAN3,RPA3,RPL7,RPTOR,STX12,TMCC1,TMEFF2,TMEM131,TRAP1,ZEB2,ZNF366,ZNF608	52 (37)	30
CBL		transcription regulator	Akt,AKT1,AR,BTK,CBL,CDKN1B,DUSP1,EGFR,ERBB2,ERK1/2,EZH2,GATA1,IGF1R,IKBKB,IKZF3,KRAS,LIN28A,MAP2K7,MAPK1,MAPK14,MAPK3,MED1,MTOR,NCL,NFAT5,NFE2L2,NOS2,Nr1h,NRAS,PAK2,PARP1,PDPK1,PI3K (complex),PLCG1,PLCG2,PPARG,PRKAA1,SIRT1,STAT3,STAT5B,SYK,TGFB1	3		0.277	0.000375	0.0028	ANKS1B,ATP5MC1,CAD,CAMK1,CDC14B,CERS6,COBL,COPG2,DBP,DIP2B,FUS,GABRA1,HDGFL3,HECW2,HLA-DOB,IER3,IGF2R,ILDR2,ISLR2,JAZF1,KLHL29,KLHL31,LEF1,LRCH1,MAP2K4,MKI67,MYO1D,NELL2,NMI,NOX5,NPR3,NRSN1,PHF11,PITRM1,POU2F1,PXN,RCAN3,S100A13,SEMA5A,SFXN1,SH2D2A,SLC12A2,SMAD9,STX12,TMCC1,TMEFF2,TRIM11,UBE4A,VAMP5,WIF1,ZEB2,ZNF366	52 (42)	33
NOTCH1		transcription regulator	Akt,AKT1,AR,CDKN1B,CEBPA,CEBPB,Creb,DUSP1,EGFR,EIF4E,ERBB2,ERK1/2,ESR1,EZH2,GATA1,GLI1,IGF1R,IKBKB,IKK (complex),LIN28A,MAPK1,MAPK3,MAPK8,MED1,MTOR,MYC,NFAT5,NFE2L2,NFkB (complex),NOTCH1,PARP1,PRKAA1,RARA,RB1,RELA,RICTOR,RPS6KB1,SIRT1,SP1,STAT3,STAT6,TP73	3		-0.13	0.000372	0.0019	AP3M2,ARL5C,ATP5MC1,CAD,CAPRIN2,CDC14B,CHCHD3,CLEC4E,COBL,COPG2,COX7A2L,DBP,FAM186A,FUS,GABRA1,GHITM,HDGFL3,HECW2,IER3,IGF2R,ILDR2,INTS1,ISLR2,JAZF1,JPT1,KCNQ3,KLHL29,KLK1,LEF1,LRCH1,MAPT,MKI67,MYO1D,NELL2,NMI,NOX5,NRSN1,PHF11,PITRM1,POU2F1,PTGER4,PTPRE,PXN,RAD51C,RCAN3,RTN2,S100A13,SH2D2A,SLC12A2,STX12,TBXAS1,TMCC1,TMEFF2,TMEM131,UBE4A,USP48,ZEB2,ZNF366,ZNF608	59 (42)	37
KSR2		kinase	APP,AR,CCND1,CEBPB,Creb,DUSP1,EIF4E,ERK,estrogen receptor,FOXO1,IKBKB,IKK (complex),Jnk,JUN,KSR2,MTOR,NFE2L2,NFkB (complex),NOS2,Notch,PLA2G4A,PPARG,RELA,RICTOR,RXRA,Smad2/3,SP1,STAT3,STAT6,TCF,TP53,YAP1	3		-0.137	0.00037	0.0021	AHI1,ANXA6,AP3M2,ATP5MC1,CDC42EP3,CDK5RAP3,CERS6,CLEC4E,COBL,COPG2,COX7A2L,CSMD3,DBP,DLST,GABRA1,GPR63,HNRNPU,IER3,ILDR2,INTS1,ISLR2,JPT1,KCNQ3,LEF1,LEMD3,MAPT,mir-128,MRC2,MYO1D,NOX5,NRSN1,NTRK1,PHF11,PITRM1,PSMC3,PSMD8,PTGER4,PTPRU,PXN,RAD51C,RPA3,S100A13,SFXN1,SH2D2A,STX12,TMCC1,TMEM131,TRAP1,UBE4A,VAMP5,WWOX,ZEB2,ZNF608	53 (32)	30
VEGFB		growth factor	APP,AR,CEBPA,CEBPB,Creb,CTNNB1,EGFR,ERBB2,ERK1/2,ESR1,FLT1,FOXO1,GATA1,IKBKB,Jnk,MED1,MTOR,NFATC2,NFE2L2,NFkB (complex),PLA2G4A,PRKAA1,PRKCG,RELA,RICTOR,Smad2/3,SP1,SRC (family),STAT3,STAT6,SYK,TCF,TLR3,TP53,VEGFB	3		-1.069	0.000369	0.0023	ANXA6,AP3M2,ATP5MC1,CAD,CDC14B,CDK5RAP3,CERS6,CLEC4E,COBL,COPG2,COX7A2L,CSMD3,DBP,DLST,FAM186A,GABRA1,GLRX3,GPR63,HECW2,ILDR2,INTS1,ISLR2,JAZF1,JPT1,KCNQ3,KLHL29,KLHL31,LAMP1,LEF1,LEMD3,MAPT,mir-128,MRC2,MYO1D,NMI,NOX5,NRSN1,NTRK1,PHF11,PITRM1,PSMC3,PSMD8,PTGER4,PTPRE,PTPRU,PXN,RPA3,S100A13,STX12,TBXAS1,TMCC1,TMEM131,TRAP1,WIF1,ZNF366,ZNF608	56 (35)	31
STYK1		kinase	Akt,CDKN1B,DUSP1,EGFR,EP300,EZH2,FOXO1,FOXO3,Hsp27,IKBKB,IRF3,Jnk,JUN,KRAS,LIN28A,MAPK1,MAPK3,MTOR,NFAT5,NFE2L2,NFkB (complex),NOS2,NRAS,PARP1,PI3K (complex),PPARGC1A,RARA,RB1,RELA,SP1,STAT3,STYK1,TSC2	3		-0.146	0.000367	0.0009	AP3M2,CAD,CAMK1,CDK5RAP3,CHCHD3,CLEC4E,COBL,COPG2,DBP,DLST,FAM186A,FUS,GABRA1,GHITM,GPR63,HDGFL3,HECW2,HNRNPU,IGF2R,ISLR2,KCNQ3,LEMD3,MAPT,MKI67,MRC2,MYO1D,NELL2,NMI,NOX5,NPR3,NRSN1,NTRK1,PHF11,POU2F1,PSMC3,PTGER4,PXN,RCAN3,RPA3,RPTOR,S100A13,SFXN1,SH2D2A,STX12,TMCC1,TMEFF2,TRIM11	47 (33)	29
IGFBP2		other	Akt,AR,Cdc42,CDKN1B,Creb,EGFR,EP300,EZH2,FOXO1,FOXO3,GLI1,IGFBP2,IKBKB,IKK (complex),IRF3,JUN,MAPK1,MTOR,NFAT5,NFkB (complex),PARP1,PI3K (family),PPARGC1A,RB1,RELA,SP1,STAT3,STAT6,TP53,TP63,TP73,TSC2	3		0.412	0.000355	0.0022	ANXA6,AP3M2,ARL5C,ATP5MC1,CAD,CAPRIN2,CDC42EP3,CDK5RAP3,CERS6,CHCHD3,CLEC4E,COBL,COPG2,CSMD3,GHITM,GPR63,HDGFL3,HECW2,IGF2R,ILDR2,INTS1,ISLR2,KCNQ3,KLK1,LAMP1,LEMD3,MAPT,mir-128,MYO1D,NELL2,NMI,NTRK1,PITRM1,POU2F1,PSMC3,PSMD8,PTGER4,PTPRE,PTPRU,PXN,RAD51C,RCAN3,RPA3,RPL7,RPTOR,STX12,TMCC1,TMEFF2,TMEM131,TRAP1,USP48,ZEB2,ZNF608	53 (32)	30
ELANE		peptidase	CEBPA,CEBPB,Creb,DUSP1,ELANE,ERK1/2,GATA1,Hsp27,IGF1R,IKBKB,IKK (complex),IL1B,INSR,Jnk,LIN28A,MAP2K7,MAPK1,MAPK3,MED1,MTOR,NFE2L2,NFkB (complex),NOS2,PARP1,PRKAA1,PRKCD,RARA,RELA,Smad2/3,SP1,STAT3,Tgf beta,TP53	3		-0.802	0.000352	0.0032	ANXA6,AP3M2,ATP5MC1,CERS6,CLEC4E,COBL,COPG2,CSMD3,DBP,DLST,FAM186A,FUS,GABRA1,GPR63,HECW2,IER3,INTS1,ISLR2,JAZF1,JPT1,KCNQ3,KLHL29,LAMP1,LEF1,LEMD3,MAP2K4,MAPT,mir-128,MKI67,MRC2,MYO1D,NEAT1,NELL2,NOX5,NRSN1,NTRK1,PHF11,POU2F1,PSMC3,PSMD8,PTGER4,PTPRE,PTPRU,PXN,RAD51C,RCAN3,RPA3,RPL7,S100A13,SFXN1,SH2D2A,STX12,TBXAS1,TMCC1,TRAP1,ZNF366	56 (33)	30
UCN		other	CCND1,CEBPA,CEBPB,Creb,CTNNB1,DUSP1,EGFR,EIF4E,ERK1/2,GATA1,GSK3B,JUN,LIN28A,Mapk,MAPK1,MAPK14,MAPK3,MED1,MKNK1,MTOR,NFE2L2,NFkB (complex),PARP1,PRKAA1,RARA,RB1,RELA,RXRA,SP1,STAT3,UCN	3		-0.429	0.000345	0.001	AHI1,AP3M2,CAD,CD82,CHCHD3,CLEC4E,COBL,COPG2,DBP,DLST,FAM186A,FUS,GABRA1,GHITM,GPR63,HECW2,HNRNPU,IGF2R,INTS1,ISLR2,JAZF1,JPT1,KCNQ3,KLHL29,LEF1,LEMD3,MAPT,MKI67,NELL2,NMI,NOX5,NRSN1,NTRK1,PHF11,POU2F1,PSMC3,PTGER4,PTPRE,PXN,RCAN3,RPA3,S100A13,SH2D2A,STX12,TBXAS1,TMCC1,UBE4A,WWOX,ZNF366	49 (31)	29
PLCG1		enzyme	CCND1,Cdc42,CEBPA,CEBPB,Creb,CREB1,CTNNB1,EGFR,ERK1/2,estrogen receptor,GATA1,IKBKB,IKK (complex),Jnk,JUN,LCP2,Mapk,MAPK1,MED1,MEF2C,MKNK1,MTOR,NCF1,NCL,NFkB (complex),PLCG1,PLCG2,PRKAA1,PRKCZ,RB1,RELA,RICTOR,RPS6KB1,RXRA,SP1,STAT3,STAT5a/b,STAT6,STK11,TP53,VAV1	3		-1.511	0.000337	0.0013	AHI1,ANXA6,AP3M2,BLK,CAD,CERS6,CHCHD3,CLEC4E,COBL,COPG2,COX7A2L,CSMD3,DBP,DLST,GHITM,HECW2,HNRNPU,HYAL3,IER3,INTS1,ISLR2,JAZF1,JPT1,KCNQ3,KLHL29,LAMP1,LEF1,LEMD3,MAPT,MRC2,MYO1D,NELL2,NMI,NOX5,NTRK1,PSMC3,PSMD8,PTGER4,PTPRE,PTPRU,PXN,RAD51C,RCAN3,STX12,TBXAS1,TMCC1,TMEM131,TRAP1,UBE4A,WIF1,WWOX,ZNF366,ZNF608	53 (41)	37
LIF		cytokine	Akt,CCND1,CDKN1B,CEBPA,CEBPB,Creb,DUSP1,EGFR,EIF4E,EP300,ERK1/2,EZH2,FOXO1,GATA1,Hsp27,IKBKB,IL6ST,INSR,IRF3,JAK1,JUN,KRAS,LIF,LIN28A,Mapk,MAPK1,MAPK3,MED1,MITF,MKNK1,MTOR,NFAT5,NFE2L2,NFkB (complex),NOS2,NRAS,PARP1,PI3K (complex),PPARGC1A,PRKAA1,RARA,RB1,RELA,RPE65,RXRA,SP1,STAT3,STAT5a/b,STAT6,TP63,TSC2	3		-1.432	0.000332	0.002	AHI1,AP3M2,ATP5MC1,CAD,CAMK1,CDK5RAP3,CERS6,CHCHD3,CLEC4E,COBL,COPG2,DBP,DLST,FAM186A,FUS,GABRA1,GHITM,GPR63,HDGFL3,HECW2,HNRNPU,INTS1,ISLR2,JAZF1,JPT1,KCNQ3,KLHL29,MAPT,MKI67,MYO1D,NELL2,NMI,NOX5,NPR3,NRSN1,NTRK1,PHF11,POU2F1,PSMC3,PTGER4,PTPRE,PTPRU,PXN,RCAN3,RPA3,RPTOR,S100A13,SFXN1,SH2D2A,STX12,TBXAS1,TMCC1,TMEFF2,TMEM131,TRIM11,UBE4A,WWOX,ZNF366,ZNF608	59 (51)	45
LRRC4		other	Creb,EGFR,ERK1/2,GSK3B,Jnk,LRRC4,MAPK1,MAPT,MEF2C,MTOR,NCF1,NFkB (complex),PRKCZ,RELA,SP1,STAT3,STAT6,STK11	3		-0.707	0.000328	0.0003	AP3M2,ATP5MC1,BLK,CAD,CD82,CLEC4E,COBL,COPG2,DBP,HYAL3,IER3,IGF2R,INTS1,ISLR2,KCNQ3,KLHL29,LEF1,MAPT,MKI67,MRC2,NMI,NOX5,PHF11,PTGER4,PTPRE,PXN,RCAN3,SLC12A2,STX12,TMCC1,TMEM131,ZNF608	32 (18)	15
AREG		growth factor	Akt,AR,AREG,Cdc42,CDKN1B,CEBPA,Creb,DUSP1,EGFR,ERK1/2,EZH2,FOXO1,GATA1,GSK3B,IRF3,Jnk,LIN28A,MAPK1,MAPK3,MED1,MTOR,MYC,NFAT5,NFE2L2,PARP1,PRKAA1,RARA,RB1,SIRT1,SP1,STAT3,STAT5A,STAT5B,STAT6,TFEB,TP53,TSC2	3		-0.397	0.000325	0.0022	ANKS1B,ANXA6,CAD,CD82,CDC42EP3,CDK5RAP3,CHCHD3,COBL,COPG2,CSMD3,DIP2B,FAM186A,FUS,GABRA1,GHITM,GPR63,HDGFL3,HECW2,IER3,ILDR2,INTS1,ISLR2,JAZF1,KCNQ3,KLHL29,LAMP1,LEMD3,LRCH1,mir-128,MKI67,MRC2,NELL2,NMI,NOX5,NRSN1,NTRK1,PHF11,PITRM1,POU2F1,PSMC3,PSMD8,PTPRE,PTPRU,RCAN3,RPTOR,RTN2,S100A13,SH2D2A,STX12,TBXAS1,TMCC1,TMEFF2,TMEM131,TRAP1,ZEB2,ZNF366,ZNF608	57 (37)	34
IL7		cytokine	APP,AR,CCND1,CEBPB,Creb,DUSP1,EIF4E,EP300,ERK,EZH2,FOXO1,IKBKB,IL7,JAK1,JAK3,Jnk,JUN,MAPK1,MAPK14,MKNK1,MTOR,NFE2L2,NOS2,Notch,PPARG,PTK2B,RICTOR,RXRA,Smad2/3,SP1,STAT3,STAT5a/b,STAT5B,TP53,YAP1	3		-0.277	0.000312	0.0023	AHI1,ANKS1B,ANXA6,ATP5MC1,CDC42EP3,CDK5RAP3,CERS6,COBL,COPG2,COX7A2L,CSMD3,DIP2B,DLST,GABRA1,GPR63,HDGFL3,HNRNPU,ILDR2,INTS1,ISLR2,JPT1,KCNQ3,KLHL31,LEMD3,MAPT,mir-128,MRC2,MYO1D,NELL2,NMI,NOX5,NRSN1,NTRK1,PHF11,PITRM1,PSMC3,PSMD8,PTPRU,RCAN3,RPA3,S100A13,SFXN1,SH2D2A,STX12,TBXAS1,TMCC1,TRAP1,UBE4A,VAMP5,WIF1,WWOX,ZEB2	52 (35)	31
BANCR		other	APP,AR,BANCR,CCND1,CEBPB,CTNNB1,CXCR4,DUSP1,EIF4E,ELAVL1,ERK,FOXO1,IKBKB,IRF3,Jnk,JUN,Mapk,Mek,MTOR,NCL,NFE2L2,NFkB (complex),PLA2G4A,PPARG,RB1,RELA,RICTOR,RXRA,Smad2/3,SP1,STAT3,STAT6,TCF,TCF7L2,TP53,YAP1	3		0	0.000312	0.0014	AHI1,ANKS1B,ANXA6,AP3M2,ATP5MC1,CDC42EP3,CDK5RAP3,CERS6,CHCHD3,CLEC4E,COBL,COPG2,COX7A2L,CSMD3,DBP,DLST,GABRA1,GHITM,HNRNPU,ILDR2,ISLR2,JPT1,KCNQ3,LAMP1,LEF1,LEMD3,MAPT,mir-128,MRC2,MYO1D,NOX5,NRSN1,NTRK1,PITRM1,PSMC3,PSMD8,PTGER4,PTPRN2,PTPRU,PXN,RPA3,RPTOR,S100A13,SH2D2A,STX12,TBXAS1,TMCC1,TMEM131,TRAP1,UBE4A,VAMP5,WIF1,WWOX,ZNF608	54 (36)	33
PRKCA		kinase	ADRB2,Akt,c-Src,CCND1,CDK2,CDKN1B,CEBPA,Creb,CREB1,DSP,EGFR,ELAVL1,ERBB2,ERK,ERK1/2,ESR1,EZH2,GATA1,GLI1,GSK3A,GSK3B,H/K/NRAS,HNF4A,IKBKB,IKK (complex),INSR,ITGB1,Jnk,KRAS,LEF1,LIN28A,MAP2K7,MAP3K7,MAPK1,MKNK1,MYC,NFkB (complex),NOS2,NRAS,P38 MAPK,PAK2,PARP1,PGR,PI3K (complex),PPARG,PRKAA1,PRKCA,PTK2,RARA,RB1,RELA,RICTOR,SMARCA4,SRC,STAT5B,SYK,TNF,TP73	3		1.953	0.000298	0.0029	AHI1,ANKS1B,AP3M2,ARHGEF10L,ARL5C,ATP5MC1,CAD,CAMK1,CAPRIN2,CDC14B,CERS6,CHCHD3,CLEC4E,COX7A2L,DIP2B,DLST,FAM186A,FUS,GHITM,GMDS,GPR63,HDGFL3,IER3,IGF2R,INTS1,JAZF1,KLHL29,KLHL31,KLK1,LEF1,MAP2K4,MELTF,MKI67,MRC2,MYO1D,NELL2,NOX5,NPR3,NTN4,NTRK1,PHF11,PLPP1,PTGER4,PTPRE,PTPRN2,PXN,RAD51C,RCAN3,RTN2,SFXN1,SIDT1,SMAD9,TBXAS1,TMEFF2,TRIM11,USP48,VAMP5,WWOX,ZNF366	59 (58)	44
GFER		enzyme	CCND1,Cdc42,CREB1,CTNNB1,CXCR4,CYP1A2,EGFR,EIF4E,ELAVL1,estrogen receptor,FOXO1,GFER,HMGA1,IKBKB,IKK (complex),IRF3,Jnk,JUN,Mapk,MAPK1,MAPK14,Mek,MKNK1,NCL,NFkB (complex),PARP1,PPARG,RB1,RELA,RXRA,SP1,STAT3,STAT5a/b,STAT6,TCF7L2,TP53	3		0.832	0.000279	0.0014	AHI1,ANKS1B,ANXA6,AP3M2,ATP5MC1,CAD,CDK5RAP3,CERS6,CHCHD3,CLEC4E,COBL,COPG2,CSMD3,DBP,DLST,GHITM,HNRNPU,IER3,IGF2R,JPT1,KCNQ3,LAMP1,LEMD3,MAPT,mir-128,MRC2,MYO1D,NELL2,NMI,NOX5,NTRK1,PHF11,POU2F1,PSMD8,PTGER4,PTPRE,PTPRN2,PTPRU,PXN,RAD51C,RCAN3,RPL7,RPTOR,SFXN1,TMEM131,TRAP1,UBE4A,VAMP5,WIF1,WWOX,ZEB2,ZNF608	52 (36)	33
SPINK7		other	CCND1,CDH1,CEBPB,Creb,CTNNB1,DUSP1,EGFR,EIF4E,ERK,IKBKB,ITGB1,Jnk,MAP2K1,Mapk,MAPK1,MKNK1,MTOR,NFkB (complex),NOS2,PLA2G4A,PPARG,PRKCD,RB1,RELA,RXRA,SPINK7,SRC,STAT3,STAT5a/b,STAT6,SYK,YAP1	3		0.447	0.000278	0.0007	AHI1,AP3M2,CAD,CDC42EP3,CHCHD3,CLEC4E,COBL,COPG2,DBP,DLST,GHITM,GPR63,IGF2R,INTS1,ISLR2,JPT1,KLHL31,LAMP1,LEF1,LEMD3,MAPT,MKI67,MRC2,MYO1D,NELL2,NOX5,NTRK1,PHF11,PTGER4,PXN,RCAN3,RPA3,RPTOR,SFXN1,SH2D2A,SIDT1,STX12,TBXAS1,TMCC1,TMEM131,UBE4A,VAMP5,WIF1,WWOX,ZNF608	45 (32)	29
miR-146a-5p (and other miRNAs w/seed GAGAACU)		mature microRNA	AR,CCND1,CDH1,CEBPB,Creb,DUSP1,EGFR,EIF4E,ERK,ERN1,FGR,Focal adhesion kinase,FOXO1,FYN,GATA1,HCK,Hsp27,IKBKB,IKK (complex),IRF3,ITGB1,Jnk,JUN,LCK,LYN,MAP2K7,MAPK14,miR-146a-5p (and other miRNAs w/seed GAGAACU),MITF,MKNK1,MTOR,NANOG,NFAT5,NFE2L2,NFkB (complex),NOS2,NRAS,P38 MAPK,PPARGC1A,PRKCD,RB1,RELA,RICTOR,RIPK2,RXRA,Smad2/3,SP1,SRC,STAT6,SYK,TP53,YES1	3		0.64	0.000275	0.0035	AHI1,ANXA6,AP3M2,ARL5C,ATP5MC1,CAD,CD82,CDK5RAP3,CERS6,CHCHD3,CLEC4E,COX7A2L,CSMD3,DBP,DLST,FUS,GABRA1,GHITM,HECW2,HNRNPU,IER3,IGF2R,ILDR2,INTS1,ISLR2,JAZF1,JPT1,KCNQ3,KLHL31,LAMP1,LEF1,LEMD3,MAP2K4,MAPT,mir-128,MRC2,MYO1D,NELL2,NPR3,NRSN1,NTRK1,PITRM1,PSMD8,PXN,RAD51C,RPA3,RPTOR,S100A13,SFXN1,SH2D2A,SIDT1,STX12,TMCC1,TMEM131,TRAP1,TRIM11,UBE4A,WIF1,WWOX,ZNF366,ZNF608	61 (52)	43
RNA polymerase II		complex	CCND1,CHEK1,CYP19A1,E2F3,EIF4E,ERBB2,FOXO3,GLI1,Jnk,JUN,MAP2K1,MAPK14,MAPK9,MTOR,PRKAA1,RB1,RELA,RNA polymerase II,STAT3,TP53,TP73,TSC2	3		1.26	0.000272	0.0008	AHI1,ANXA6,AP3M2,ARL5C,ATP5MC1,CAPRIN2,CD82,CDC14B,CDC42EP3,CERS6,CHCHD3,CLEC4E,COBL,COPG2,CSMD3,DBP,DLST,GHITM,GPR63,HNRNPU,IER3,ISLR2,JPT1,KLHL29,KLK1,LAMP1,LEMD3,MAPT,mir-128,MKI67,MRC2,NEAT1,NMI,NOX5,NTRK1,PSMC3,PSMD8,PTGER4,PTPRE,PTPRU,PXN,RPL7,SLC12A2,STX12,TMCC1,TRAP1,UBE4A,USP48,WIF1,WWOX,ZEB2	51 (22)	20
Gsk3		group	Akt,AR,CBLB,CCND1,CDKN1B,Creb,DSP,EGFR,EIF4E,ERBB2,EZH2,Foxo,FOXO1,FOXO3,GLI1,Gsk3,HNF4A,IGF1R,IKK (complex),IRF3,LEF1,MTOR,NFAT5,NFE2L2,PARP1,PPARG,PPARGC1A,PRKAA1,PRKCD,RB1,RICTOR,SIRT1,SP1,STAT3,STAT6,TFEB,TP53,TP73	3		-1.116	0.000262	0.0036	AHI1,ANXA6,ARL5C,ATP5MC1,CAD,CAPRIN2,CD82,CDC14B,CDC42EP3,CDK5RAP3,CERS6,CHCHD3,COBL,COPG2,COX7A2L,CSMD3,DBP,DLST,GABRA1,GHITM,GMDS,GPR63,HDGFL3,HECW2,IER3,IGF2R,ILDR2,INTS1,ISLR2,JPT1,KCNQ3,KLHL29,KLK1,LAMP1,LEMD3,LRCH1,MAPT,mir-128,MKI67,NELL2,NRSN1,NTN4,PITRM1,POU2F1,PSMC3,PSMD8,PTPRU,RAD51C,RPA3,RPL7,RPTOR,S100A13,SLC12A2,STX12,TBXAS1,TMCC1,TMEFF2,TMEM131,TRAP1,UBE4A,USP48,VAMP5,WWOX,ZEB2,ZNF…	65 (38)	33
PI3K (complex)		complex	ACTN4,Akt,AKT1,AMPK,CCND1,CDK1,CDKN1B,CHUK,DUSP1,ERBB2,ERK,ERK1/2,EZH2,Focal adhesion kinase,FOXO1,FOXO3,GATA1,GLI1,Gsk3,GSK3B,Hsp27,IKBKB,IRF3,ITGB1,Jnk,KDM1A,KDM5B,KRAS,LIN28A,MAP2K1,MAP2K1/2,MAPK1,MAPK3,MED1,MEF2C,MKNK1,MTOR,NANOG,NCF1,NFAT5,NFkB (complex),NOS2,NRAS,OXSR1,P38 MAPK,PARP1,PDPK1,PI3K (complex),PRKAA1,PRKAA2,PRKCZ,RAC1,RAP1B,RB1,RELA,RICTOR,RPS6KB1,RPTOR,SIRT1,SOX2,SP1,STAT3,STAT5…	3		-1.033	0.00026	0.0014	AHI1,AP3M2,ARL5C,BBS9,BLK,CAMK1,CAPRIN2,CDC14B,CDC42EP3,CDK5RAP3,CHCHD3,CLEC4E,COBL,COPG2,COX7A2L,DBP,DLST,FOXN4,FUS,GHITM,GLRX3,GPR63,HDGFL3,HECW2,HYAL3,ISLR2,JAZF1,KCNQ3,KLHL29,KLK1,LEF1,LEMD3,LRCH1,MKI67,MRC2,MYO1D,NELL2,NMI,NOX5,NPR3,NTRK1,POU2F1,PTGER4,PTPRE,PXN,RCAN3,RPTOR,SEMA5A,SFXN1,SH2D2A,SIDT1,SLC12A2,TMCC1,TMEFF2,TMEM131,TRIM11,USP48,WWOX,ZNF366,ZNF608	60 (67)	47
NTRK2		kinase	Akt,CCND1,CDKN1B,CEBPB,Creb,DUSP1,EGFR,EIF4E,EP300,ERK,ERK1/2,EZH2,FOXO1,GATA1,IRF3,Jnk,JUN,LIN28A,MAPK1,MAPK3,MED1,MTOR,NFAT5,NFE2L2,NFkB (complex),NOS2,NTRK2,PARP1,PPARG,PRKAA1,RARA,RB1,RELA,RXRA,SP1,STAT3,TSC2	3		-0.7	0.000257	0.0022	AHI1,AP3M2,CAD,CDC42EP3,CDK5RAP3,CHCHD3,CLEC4E,COBL,COPG2,FAM186A,FUS,GABRA1,GHITM,HDGFL3,HECW2,HNRNPU,IER3,INTS1,ISLR2,JAZF1,JPT1,KCNQ3,KLHL29,LEMD3,MAPT,MRC2,NELL2,NMI,NOX5,NRSN1,NTRK1,PHF11,POU2F1,PSMC3,PTGER4,PTPRE,PXN,RCAN3,RPA3,RPTOR,S100A13,SFXN1,SH2D2A,SLC12A2,STX12,TMCC1,TMEFF2,UBE4A,VAMP5,WWOX,ZNF366	51 (37)	33
RAD17		enzyme	CCND1,CHEK1,CYP19A1,E2F3,EIF4E,ERBB2,FOXO3,GLI1,Jnk,JUN,MAP2K1,MAPK14,MAPK9,MTOR,PRKAA1,RAD17,RB1,RELA,STAT3,TP53,TP73,TSC2	3		1.26	0.000257	0.0006	AHI1,ANXA6,AP3M2,ARL5C,ATP5MC1,CAPRIN2,CD82,CDC14B,CDC42EP3,CERS6,CHCHD3,CLEC4E,COBL,COPG2,CSMD3,DBP,DLST,GHITM,GPR63,HNRNPU,IER3,ISLR2,JPT1,KLHL29,KLK1,LAMP1,LEMD3,MAPT,mir-128,MKI67,MRC2,NEAT1,NMI,NOX5,NTRK1,PSMC3,PSMD8,PTGER4,PTPRE,PTPRU,PXN,RPL7,SLC12A2,STX12,TMCC1,TRAP1,UBE4A,USP48,WIF1,WWOX,ZEB2	51 (22)	20
IL6R		transmembrane receptor	APP,AR,CCND1,CEBPB,Creb,CREB1,DUSP1,EGFR,EIF4E,EP300,ERK,ERK1/2,estrogen receptor,FOXO1,FOXO3,GATA1,Hsp27,IKBKB,IKK (complex),IL6R,IL6ST,JAK1,Jnk,KAT5,LIN28A,MAPK1,MED1,MITF,MKNK1,MTOR,NFAT5,NFE2L2,NFkB (complex),NOS2,P38 MAPK,PARP1,PPARGC1A,PRKAA1,RARA,RB1,RELA,RICTOR,RXRA,Smad2/3,SP1,STAT3,STAT6,TP53	3		-1.386	0.00024	0.0028	AHI1,ANXA6,AP3M2,ATP5MC1,CAD,CD82,CDK5RAP3,CERS6,CHCHD3,CLEC4E,COBL,COPG2,COX7A2L,CSMD3,DBP,DLST,FAM186A,FUS,GABRA1,GHITM,HECW2,IER3,ILDR2,INTS1,ISLR2,JAZF1,JPT1,KCNQ3,KLHL29,LEF1,LEMD3,MAPT,mir-128,MKI67,MRC2,MYO1D,NELL2,NMI,NOX5,NRSN1,NTRK1,PHF11,PITRM1,POU2F1,PSMC3,PSMD8,PTGER4,PTPRE,PXN,RAD51C,RCAN3,RPA3,S100A13,SFXN1,SH2D2A,STX12,TMCC1,TMEM131,TRAP1,UBE4A,WWOX,ZNF366,ZNF608	63 (48)	44
BIRC5		other	BAX,BCL2,BIRC5,caspase,CCND1,CYP19A1,EIF4E,ERBB2,FOXO3,GLI1,IRF3,Jnk,MAP2K1,MAPK14,MTOR,NFkB (complex),PARP1,PRKAA1,RB1,RELA,STAT3,TP53,TP73,TSC2	3		-0.98	0.000236	0.0006	AHI1,ANXA6,AP3M2,ARL5C,ATP5MC1,CAPRIN2,CD82,CDC14B,CDC42EP3,CERS6,CHCHD3,COBL,COPG2,CSMD3,DBP,DLST,GHITM,GPR63,IER3,ISLR2,JPT1,KLHL29,KLK1,LAMP1,LEMD3,MAPT,mir-128,MKI67,MRC2,NELL2,NOX5,NTRK1,PHF11,POU2F1,PSMC3,PSMD8,PTGER4,PTPRE,PTPRU,PXN,RPL7,RPTOR,SLC12A2,STX12,TMCC1,TRAP1,UBE4A,USP48,WIF1,WWOX,ZEB2	51 (24)	20
AKAP12		transporter	ADRB2,AKAP12,CCND1,Creb,DUSP1,EGFR,ELAVL1,ERK1/2,FOXO3,IKBKB,IKK (complex),INSR,Jnk,JUN,LIN28A,MAPK1,MAPK14,PARP1,PRKCA,PTH,RARA,RB1,RELA,TNF,TP53,TP73	3		0.146	0.000235	0.0009	AHI1,ANXA6,AP3M2,ARHGEF10L,ARL5C,ATP5MC1,CAD,CERS6,CHCHD3,COBL,CSMD3,DLST,FAM186A,FUS,GABRA1,GHITM,GPR63,HNRNPU,IGF2R,INTS1,JPT1,LEF1,LEMD3,MAP2K4,mir-128,MKI67,MRC2,MYO1D,NELL2,NMI,NOX5,NTRK1,PHF11,PLPP1,PSMD8,PTGER4,PTPRE,PTPRN2,PTPRU,RAD51C,RCAN3,RPL7,SH2D2A,TRAP1,WIF1,WWOX,ZEB2	47 (26)	23
EHMT1		transcription regulator	CCND1,CYP19A1,EHMT1,EIF4E,ERBB2,FOXO3,GLI1,Jnk,JUN,MAP2K1,MAPK14,MAPK9,MTOR,PRKAA1,RB1,RELA,STAT3,TP53,TP73,TSC2	3		-0.98	0.000232	0.0007	AHI1,ANXA6,AP3M2,ARL5C,ATP5MC1,CAPRIN2,CD82,CDC14B,CDC42EP3,CERS6,CHCHD3,CLEC4E,COBL,COPG2,CSMD3,DBP,DLST,GHITM,GPR63,HNRNPU,IER3,ISLR2,JPT1,KLHL29,KLK1,LAMP1,LEMD3,MAPT,mir-128,MKI67,MRC2,NMI,NOX5,NTRK1,PLPP1,PSMC3,PSMD8,PTGER4,PTPRE,PTPRU,PXN,RPL7,SLC12A2,STX12,TMCC1,TRAP1,UBE4A,USP48,WIF1,WWOX,ZEB2	51 (20)	20
Gpcr		group	Akt,Cdc42,CDKN1B,CEBPA,CEBPB,DUSP1,EGFR,ERK1/2,EZH2,FYN,GATA1,GLI1,Gpcr,IKBKB,IKK (complex),IRF3,ITGB1,Jnk,LIN28A,MAPK1,MED1,MTOR,NCF1,NFAT5,NFE2L2,NFkB (complex),NOS2,PAK2,PARP1,PIK3CG,PPARGC1A,PRKAA1,PRKCD,PRKD1,RARA,RB1,RICTOR,SP1,STAT3,TP73	3		-1.387	0.000221	0.0015	ARL5C,CAD,CAPRIN2,CHCHD3,CLEC4E,COBL,COPG2,COX7A2L,DBP,FAM186A,FUS,GABRA1,GHITM,HDGFL3,HECW2,HYAL3,IER3,ISLR2,JAZF1,JPT1,KCNQ3,KLHL29,KLK1,LAMP1,MAPT,MKI67,MRC2,MYO1D,NELL2,NMI,NOX5,NRSN1,PHF11,POU2F1,PTPRE,PXN,RAD51C,RCAN3,RPA3,RPTOR,S100A13,SFXN1,SH2D2A,SIDT1,SMAD9,STX12,TBXAS1,TMCC1,TMEFF2,USP48,ZEB2,ZNF366	52 (40)	36
PPM1B		phosphatase	CCND1,Creb,CYP19A1,EIF4E,ERBB2,FOXO3,GLI1,Jnk,JUN,MAP2K1,MAPK14,MAPK9,MAPT,MTOR,PPM1B,PRKAA1,RB1,RELA,STAT3,TP53,TP73,TSC2	3		-1.26	0.000219	0.0005	AHI1,ANXA6,AP3M2,ARL5C,ATP5MC1,CAPRIN2,CD82,CDC14B,CDC42EP3,CERS6,CHCHD3,CLEC4E,COBL,COPG2,CSMD3,DBP,DLST,GHITM,GPR63,HNRNPU,IER3,INTS1,ISLR2,JPT1,KLHL29,KLK1,LAMP1,LEMD3,MAPT,mir-128,MKI67,MRC2,NMI,NOX5,NTRK1,PSMC3,PSMD8,PTGER4,PTPRE,PTPRU,PXN,RPL7,SLC12A2,STX12,TMCC1,TRAP1,UBE4A,USP48,WIF1,WWOX,ZEB2	51 (22)	20
mir-8		microRNA	CCND1,CYP19A1,EIF4E,ERBB2,FOXO3,GLI1,Jnk,JUN,MAP2K1,MAPK14,MAPK9,mir-8,MTOR,PRKAA1,RB1,RELA,STAT3,TP53,TP73,TSC2	3		1.26	0.000216	0.0006	AHI1,ANXA6,AP3M2,ARL5C,ATP5MC1,CAPRIN2,CD82,CDC14B,CDC42EP3,CERS6,CHCHD3,CLEC4E,COBL,COPG2,CSMD3,DBP,DLST,GHITM,GPR63,HNRNPU,IER3,ISLR2,JAZF1,JPT1,KLHL29,KLK1,LAMP1,LEMD3,MAPT,mir-128,MKI67,MRC2,NMI,NOX5,NTRK1,PSMC3,PSMD8,PTGER4,PTPRE,PTPRU,PXN,RPL7,SLC12A2,STX12,TMCC1,TRAP1,UBE4A,USP48,WIF1,WWOX,ZEB2	51 (20)	20
SFTPD		other	Akt,CCND1,Cdc42,CDKN1B,CEBPB,Creb,DUSP1,EGFR,EIF4E,EP300,ERK,estrogen receptor,EZH2,FOXO1,IKBKB,IKK (complex),IRF3,Jnk,JUN,MAPK1,MMP2,MMP9,MTOR,NFAT5,NFkB (complex),NOS2,PARP1,PPARG,PPARGC1A,RB1,RELA,RXRA,SFTPD,SP1,STAT3,STAT6,TP53,TSC2	3		0.267	0.000197	0.0016	AHI1,ANXA6,AP3M2,ATP5MC1,CAD,CDK5RAP3,CERS6,CHCHD3,CLEC4E,COBL,COPG2,CSMD3,DBP,DLST,GHITM,HDGFL3,HECW2,HNRNPU,IER3,IGF2R,INTS1,ISLR2,JPT1,KCNQ3,LAMP1,MAPT,mir-128,MRC2,MYO1D,NELL2,NMI,NTRK1,POU2F1,PSMC3,PSMD8,PTGER4,PTPRE,PTPRU,PXN,RAD51C,RCAN3,RPA3,RPL7,RPTOR,SFXN1,SH2D2A,STX12,TMCC1,TMEFF2,TMEM131,TRAP1,UBE4A,VAMP5,WWOX,ZEB2,ZNF608	56 (38)	33
ZNF148		transcription regulator	CASP8,CCND1,CYP19A1,EIF4E,ERBB2,FOXO3,GLI1,IRF3,Jnk,JUN,MAP2K1,MAPK14,MAPK9,MTOR,NFkB (complex),PRKAA1,RB1,RELA,STAT3,TBK1,TP53,TP73,TSC2,ZNF148	3		1.26	0.000194	0.0004	AHI1,ANXA6,AP3M2,ARL5C,ATP5MC1,CAPRIN2,CD82,CDC14B,CDC42EP3,CERS6,CHCHD3,COBL,COPG2,CSMD3,DBP,DLST,GHITM,GPR63,HNRNPU,IER3,ISLR2,JPT1,KLHL29,KLK1,LAMP1,LEMD3,MAPT,mir-128,MKI67,MRC2,NMI,NOX5,NTRK1,PHF11,PSMC3,PSMD8,PTGER4,PTPRE,PTPRU,PXN,RPL7,RPTOR,SLC12A2,STX12,TMCC1,TRAP1,UBE4A,USP48,WIF1,WWOX,ZEB2	51 (24)	22
BDKRB1		G-protein coupled receptor	APP,AR,BDKRB1,CCND1,CEBPB,Creb,CTNNB1,DUSP1,EIF4E,ERK,ERK1/2,FOXO1,GATA1,IKBKB,IKK (complex),Jnk,MAP3K5,MED1,MTOR,NCF1,NFE2L2,NFkB (complex),NOS2,PPARG,PRKAA1,RELA,RICTOR,RXRA,Smad2/3,SP1,STAT3,STAT6,TLR3,TP53	3		-0.267	0.00019	0.0009	AHI1,ANXA6,AP3M2,ATP5MC1,CDK5RAP3,CERS6,CLEC4E,COBL,COPG2,COX7A2L,CSMD3,DBP,DLST,GABRA1,GLRX3,GPR63,HECW2,HYAL3,ILDR2,INTS1,ISLR2,JAZF1,JPT1,KCNQ3,KLHL29,LEF1,LEMD3,MAPT,mir-128,MRC2,MYO1D,NRSN1,NTRK1,PHF11,PITRM1,PSMC3,PSMD8,PTGER4,PTPRE,PTPRU,PXN,RAD51C,RPA3,S100A13,SFXN1,SH2D2A,STX12,TMCC1,TMEM131,TRAP1,UBE4A,VAMP5,WIF1,WWOX,ZNF366,ZNF608	56 (34)	31
PIK3CG		kinase	Akt,AKT1,AR,ARF1,CCND1,CDKN1B,CEBPB,Creb,DUSP1,EIF4E,ERBB2,ERK,ERK1/2,EZH2,FOXO1,GATA1,GSK3B,Hsp27,IKBKB,IKK (complex),ITGB1,ITGB3,Jnk,LCP2,LIN28A,MAPK1,MAPK3,MED1,MEF2C,MKNK1,MTOR,NCF1,NFAT5,NFE2L2,NFkB (complex),NOS2,NOS3,P38 MAPK,PAK2,PARP1,PDPK1,PIK3CG,PRKAA1,PRKCD,PRKCZ,RAC1,RARA,RB1,RELA,RXRA,SP1,SRC,STK11,SYK,TFEB,TSC2	3		-0.802	0.000181	0.0023	AHI1,AP3M2,BLK,CDC14B,CDC42EP3,CDK5RAP3,CHCHD3,CLEC4E,DBP,FAM186A,FUS,GABRA1,GHITM,HDGFL3,HECW2,HYAL3,ILDR2,INTS1,ISLR2,JAZF1,JPT1,KCNQ3,KLHL29,KLHL31,LAMP1,LEF1,LEMD3,MKI67,MRC2,MYO1D,NELL2,NMI,NOX5,NRSN1,NTRK1,PHF11,PITRM1,POU2F1,PSMC3,PTGER4,PTPRE,RAD51C,RCAN3,RPA3,S100A13,SFXN1,SH2D2A,SIDT1,SLC12A2,SMAD9,TMCC1,TMEFF2,UBE4A,WWOX,ZEB2,ZNF366	56 (56)	42
DUSP10		phosphatase	APP,AR,CCND1,CEBPA,CEBPB,Creb,CREB1,CTNNB1,DUSP10,EGFR,EIF4E,ERK1/2,FOXO1,GATA1,IKBKB,Jnk,JUN,Mapk,MED1,MKNK1,MTOR,NFE2L2,NFkB (complex),PLA2G4A,PRKAA1,RB1,RELA,RICTOR,RXRA,Smad2/3,SP1,STAT3,STAT5a/b,STAT6,TCF,TP53	3		1.069	0.000177	0.001	AHI1,ANXA6,AP3M2,ATP5MC1,CAD,CDK5RAP3,CERS6,CHCHD3,CLEC4E,COBL,COPG2,COX7A2L,CSMD3,DBP,DLST,GABRA1,GHITM,HECW2,HNRNPU,ILDR2,INTS1,ISLR2,JAZF1,JPT1,KCNQ3,KLHL29,LEF1,LEMD3,MAPT,mir-128,MRC2,MYO1D,NELL2,NOX5,NRSN1,NTRK1,PHF11,PITRM1,PSMC3,PSMD8,PTGER4,PTPRE,PTPRU,PXN,RPA3,S100A13,STX12,TBXAS1,TMCC1,TMEM131,TRAP1,UBE4A,WIF1,WWOX,ZNF366,ZNF608	56 (36)	35
ERBB3		kinase	Akt,CCND1,CDKN1B,CEBPB,DUSP1,EGFR,EIF4E,ELAVL1,ERBB2,ERBB3,ERK,ERK1/2,ESR1,EZH2,FOXO1,GATA1,GLI1,Gsk3,IKBKB,IRF3,LIN28A,MAP2K1,Mapk,MAPK1,MAPK3,MED1,MKNK1,MTOR,MYC,NCL,NDRG1,NFAT5,NFE2L2,PARP1,PGR,PI3K (family),PPARG,PPARGC1A,PRKAA1,Rac,RAC1,RAF1,RARA,RELA,RICTOR,RXRA,SIRT1,SP1,STAT5B,STAT6,STK11,SYK	3		0.64	0.000176	0.002	AHI1,ANKS1B,AP3M2,ATP5MC1,CAD,CAPRIN2,CD82,CDC14B,CDC42EP3,CDK5RAP3,CLEC4E,COX7A2L,DBP,DIP2B,FAM186A,FUS,GABRA1,HDGFL3,HECW2,IER3,ISLR2,JAZF1,JPT1,KCNQ3,KLHL29,KLHL31,KLK1,LAMP1,LRCH1,MAPT,MKI67,MYO1D,NELL2,NMI,NOX5,NRSN1,NTRK1,POU2F1,PSMD8,PTGER4,PTPRE,PTPRN2,PXN,RCAN3,RPA3,RPL7,RPTOR,RTN2,SH2D2A,SLC12A2,STX12,TMCC1,TMEFF2,TMEM131,UBE4A,USP48,VAMP5,WWOX,ZEB2,ZNF366,ZNF608	61 (52)	44
Hspa1b		other	APP,AR,CASP9,CCND1,CEBPB,Creb,DUSP1,EIF4E,ERK,FOXO1,Hspa1b,IKBKB,Jnk,JUN,MTOR,NFE2L2,NFkB (complex),NOS2,Notch,PLA2G4A,PPARG,RELA,RICTOR,RXRA,Smad2/3,SP1,STAT3,STAT6,TCF,TP53,YAP1	3		-0.277	0.000174	0.0013	AHI1,ANXA6,AP3M2,ATP5MC1,CDC42EP3,CDK5RAP3,CERS6,CLEC4E,COBL,COPG2,COX7A2L,CSMD3,DBP,DLST,GABRA1,GPR63,HNRNPU,ILDR2,INTS1,ISLR2,JPT1,KCNQ3,LEF1,LEMD3,MAPT,mir-128,MRC2,MYO1D,NOX5,NRSN1,NTRK1,PHF11,PITRM1,PSMC3,PSMD8,PTGER4,PTPRU,PXN,RPA3,S100A13,SFXN1,SH2D2A,STX12,TBXAS1,TMCC1,TMEM131,TRAP1,UBE4A,VAMP5,WWOX,ZEB2,ZNF608	52 (31)	28
SRSF2		transcription regulator	CCND1,Creb,EIF4E,ERBB2,FOXO3,GLI1,Jnk,JUN,MAP2K1,MAPK14,MAPK9,MTOR,MTORC1,PRKAA1,RB1,RELA,RICTOR,SREBF1,SRSF2,STAT3,TP53,TP73,TSC2	3		-1.236	0.000168	0.0004	AHI1,ANXA6,AP3M2,ARL5C,ATP5MC1,CAPRIN2,CD82,CDC14B,CDC42EP3,CERS6,CHCHD3,CLEC4E,COBL,COPG2,COX7A2L,CSMD3,DBP,DLST,GHITM,GPR63,HNRNPU,IER3,INTS1,ISLR2,JPT1,KLHL29,KLK1,LAMP1,LEMD3,MAPT,mir-128,MKI67,MRC2,NMI,NOX5,NTRK1,PHF11,PSMC3,PSMD8,PTGER4,PTPRE,PTPRU,RPL7,S100A13,SLC12A2,STX12,TMCC1,TRAP1,UBE4A,USP48,WIF1,WWOX,ZEB2	53 (23)	22
MST1R		kinase	Akt,BAK1,BAX,CCND1,CDKN1B,CEBPB,Creb,DUSP1,EGFR,EIF4E,EP300,ERK,ERK1/2,estrogen receptor,EZH2,FOXO1,IKBKB,IKK (complex),IRF3,JUN,LIN28A,Mapk,MAPK1,MAPK3,MED1,MKNK1,MST1R,MTOR,NFAT5,NFE2L2,NFkB (complex),NOS2,PARP1,PIK3CA,PPARG,PPARGC1A,PRKAA1,RARA,RB1,RELA,RXRA,SP1,STAT3,TP53,TSC2	3		-0.258	0.000165	0.001	AHI1,ANXA6,AP3M2,ATP5MC1,CAD,CDK5RAP3,CERS6,CHCHD3,CLEC4E,COBL,COPG2,CSMD3,DBP,DLST,FAM186A,FUS,GABRA1,GHITM,HDGFL3,HECW2,HNRNPU,IER3,IGF2R,INTS1,ISLR2,JPT1,KCNQ3,KLHL29,MAPT,mir-128,MKI67,MYO1D,NELL2,NMI,NOX5,NRSN1,NTRK1,PHF11,POU2F1,PSMC3,PSMD8,PTGER4,PTPRE,PTPRU,PXN,RAD51C,RCAN3,RPA3,RPL7,RPTOR,S100A13,SFXN1,SH2D2A,STX12,TMCC1,TMEFF2,TRAP1,UBE4A,VAMP5,WWOX	60 (45)	38
SRC		kinase	ADRB2,Akt,AKT1,CBL,CCND1,CDH1,CDKN1B,CEBPB,CHUK,Creb,CTNNB1,DUSP1,EGFR,EIF4E,ERK,ERK1/2,EZH2,Focal adhesion kinase,GATA1,GLI1,IKBKB,IKZF3,ITGB1,Jnk,KRAS,LEF1,LIN28A,MAP2K1,MAP2K1/2,Mapk,MAPK1,MAPK3,MAPK7,MAPK8,MED1,MEF2C,MEF2D,MITF,MKNK1,MTOR,MYC,NANOG,NFAT5,NFkB (complex),NFKBIA,NOS2,NRAS,P38 MAPK,PAK2,PARP1,PDPK1,PI3K (complex),PPARGC1A,PRKAA1,PRKCD,PTK2,RAC1,RB1,RELA,RICTOR,SIRT1,SP1,SRC,STAT3…	3		-0.97	0.000164	0.0022	AHI1,AP3M2,ARHGEF10L,ARL5C,BLK,CAD,CAMK1,CAPRIN2,CD82,CDC42EP3,CHCHD3,CLEC4E,COBL,COPG2,COX7A2L,DBP,DLST,FUS,GHITM,GPR63,HDGFL3,HECW2,IER3,IGF2R,INTS1,ISLR2,JAZF1,JPT1,KCNQ3,KLHL29,KLHL31,KLK1,LAMP1,LEF1,LRCH1,MAP2K4,MAPT,MKI67,MRC2,MYO1D,NELL2,NOX5,NPR3,NTN4,PHF11,PLPP1,POU2F1,PTGER4,PXN,RCAN3,RPA3,RPTOR,RTN2,SEMA5A,SFXN1,SH2D2A,SIDT1,SMAD9,TMCC1,TMEFF2,TMEM131,TRIM11,UBE4A,USP48,WIF1,WWOX,ZNF36…	68 (71)	53
NCF1		enzyme	ATM,CAMK4,CCND1,CEBPA,CEBPB,Creb,DUSP1,EGFR,EIF4E,ERK,ERK1/2,ERN1,FYN,GATA1,IKBKB,IKK (complex),ITGB1,JAK2,JUN,MAP3K14,MAP3K5,MAPK1,MEF2D,MTOR,NADPH oxidase,NCF1,NFkB (complex),NOS2,PPARG,PRKCD,RB1,RELA,RXRA,SP1,STAT3,STAT5B,TP53	3		0.544	0.000155	0.0007	AHI1,ANKS1B,ANXA6,AP3M2,ATP5MC1,BLK,CAD,CDC42EP3,CERS6,CHCHD3,CLEC4E,COBL,COPG2,CSMD3,DBP,DIP2B,DLST,GHITM,HNRNPU,HYAL3,IER3,IGF2R,INTS1,ISLR2,JAZF1,JPT1,KCNQ3,LAMP1,LEMD3,MAPT,mir-128,MYO1D,NMI,NTRK1,PHF11,PSMD8,PTGER4,PTPRE,PTPRU,PXN,RAD51C,RCAN3,RPA3,RPL7,SFXN1,SH2D2A,SIDT1,STX12,TMCC1,TRAP1,UBE4A,VAMP5,WWOX,ZNF366	54 (37)	30
UBR5		enzyme	BAX,CCND1,CYP19A1,EIF4E,ERBB2,FOXO3,GLI1,IRF3,Jnk,MAP2K1,MAPK14,MAPK9,MTOR,PRKAA1,RB1,RELA,STAT3,TP53,TP73,TSC2,UBR5	3		-1.26	0.000153	0.0005	AHI1,ANXA6,AP3M2,ARL5C,ATP5MC1,CAPRIN2,CD82,CDC14B,CDC42EP3,CERS6,CHCHD3,CLEC4E,COBL,COPG2,CSMD3,DBP,DLST,GHITM,GPR63,IER3,ISLR2,JPT1,KLHL29,KLK1,LAMP1,LEMD3,MAPT,mir-128,MKI67,MRC2,NMI,NOX5,NTRK1,PHF11,PSMC3,PSMD8,PTGER4,PTPRE,PTPRU,PXN,RPL7,RPTOR,SLC12A2,STX12,TMCC1,TRAP1,UBE4A,USP48,WIF1,WWOX,ZEB2	51 (21)	19
XRCC6		enzyme	BAX,CCND1,CYP19A1,EIF4E,ERBB2,FOXO3,GLI1,IRF3,JUN,MAP2K1,MAPK14,MAPK9,MTOR,PRKAA1,RB1,RELA,STAT3,TP53,TP73,TSC2,XRCC6	3		-1.26	0.000152	0.0005	AHI1,ANXA6,AP3M2,ARL5C,ATP5MC1,CAPRIN2,CD82,CDC14B,CDC42EP3,CERS6,CHCHD3,CLEC4E,COBL,COPG2,CSMD3,DBP,DLST,GHITM,GPR63,HNRNPU,IER3,ISLR2,JPT1,KLHL29,KLK1,LAMP1,LEMD3,MAPT,mir-128,MKI67,NMI,NOX5,NTRK1,PHF11,PSMC3,PSMD8,PTGER4,PTPRE,PTPRU,PXN,RPL7,RPTOR,SLC12A2,STX12,TMCC1,TRAP1,UBE4A,USP48,WIF1,WWOX,ZEB2	51 (21)	19
NF1		other	CCND1,CEBPB,Creb,CTNNB1,DUSP1,EGFR,EIF4E,ERK,ESR1,GATA1,GNAS,GSK3B,H/K/NRAS,JUN,KRAS,LIN28A,MAPK1,MAPK14,MAPK3,MTOR,NF1,NFAT5,NFE2L2,NOS2,PARP1,PPARG,RAC1,RARA,RELA,RXRA,STAT3,TP53	3		-0.816	0.000146	0.0009	AHI1,ANXA6,AP3M2,ATP5MC1,CAD,CAMK1,CD82,CERS6,COBL,COPG2,CSMD3,DLST,FAM186A,FUS,GABRA1,GPR63,HECW2,HNRNPU,IGF2R,INTS1,ISLR2,JAZF1,JPT1,KCNC1,LAMP1,LEMD3,MAPT,mir-128,MKI67,NELL2,NMI,NOX5,NRSN1,NTRK1,PHF11,POU2F1,PSMC3,PSMD8,PTGER4,PTPRU,RCAN3,RPA3,RPL7,S100A13,SFXN1,SH2D2A,STX12,TMCC1,TRAP1,UBE4A,VAMP5,WIF1,WWOX,ZNF366	54 (32)	27
UFL1		enzyme	CCND1,CYP19A1,EIF4E,ERBB2,FOXO3,GLI1,Jnk,JUN,MAP2K1,MAPK14,MAPK9,MTOR,PRKAA1,RB1,RELA,STAT3,TP53,TP73,TSC2,UFL1	3		1.26	0.000145	0.0003	AHI1,ANXA6,AP3M2,ARL5C,ATP5MC1,CAPRIN2,CD82,CDC14B,CDC42EP3,CDK5RAP3,CERS6,CHCHD3,CLEC4E,COBL,COPG2,CSMD3,DBP,DLST,GHITM,GPR63,HNRNPU,IER3,ISLR2,JPT1,KLHL29,KLK1,LAMP1,LEMD3,MAPT,mir-128,MKI67,MRC2,NMI,NOX5,NTRK1,PSMC3,PSMD8,PTGER4,PTPRE,PTPRU,PXN,RPL7,SLC12A2,STX12,TMCC1,TRAP1,UBE4A,USP48,WIF1,WWOX,ZEB2	51 (20)	20
CARM1		transcription regulator	CARM1,CCND1,CYP19A1,EIF4E,ERBB2,FOXO3,GLI1,Jnk,JUN,KDM1A,MAP2K1,MAPK14,MAPK9,MTOR,PRKAA1,RB1,RELA,STAT3,TP53,TP73,TSC2	3		0.832	0.000138	0.0003	AHI1,ANXA6,AP3M2,ARL5C,ATP5MC1,CAD,CAPRIN2,CD82,CDC14B,CDC42EP3,CERS6,CHCHD3,CLEC4E,COBL,COPG2,CSMD3,DBP,DLST,FOXN4,GHITM,GPR63,HNRNPU,IER3,ISLR2,JPT1,KLHL29,KLK1,LAMP1,LEMD3,MAPT,mir-128,MKI67,MRC2,NMI,NOX5,NTRK1,PSMC3,PSMD8,PTGER4,PTPRE,PTPRU,PXN,RPL7,SLC12A2,STX12,TMCC1,TRAP1,UBE4A,USP48,WIF1,WWOX,ZEB2	52 (21)	20
H2AX		transcription regulator	ATM,CCND1,Creb,DUSP1,EGFR,EIF4E,ERBB2,FOXO3,GLI1,H2AX,IKBKB,IKK (complex),IRF3,JUN,LIN28A,MAPK1,MAPK3,MEF2D,MTOR,NFE2L2,PARP1,PRKAA1,RARA,SIRT1,STAT3,TP53,TP73,TSC2	3		0.132	0.000129	0.001	AHI1,ANXA6,ARL5C,ATP5MC1,BLK,CAD,CAPRIN2,CD82,CDC14B,CDC42EP3,CERS6,COPG2,CSMD3,DBP,DLST,FAM186A,FUS,GABRA1,GPR63,HNRNPU,IER3,INTS1,ISLR2,JPT1,KLHL29,KLK1,LAMP1,LEMD3,LRCH1,MAPT,mir-128,MYO1D,NELL2,NMI,NOX5,NRSN1,NTRK1,PHF11,POU2F1,PSMC3,PSMD8,PTPRE,PTPRU,RAD51C,RCAN3,RPL7,RPTOR,S100A13,SH2D2A,SLC12A2,STX12,TMCC1,TRAP1,UBE4A,USP48,WWOX,ZEB2	57 (28)	25
PA2G4		transcription regulator	CCND1,CYP19A1,EIF4E,ERBB2,FOXO3,GLI1,IRF4,Jnk,JUN,MAP2K1,MAPK14,MAPK9,MTOR,PA2G4,PI3K (family),PI3K p85,PRKAA1,RB1,RELA,STAT3,TP53,TP73,TSC2	3		-0.98	0.000128	0.0003	AHI1,ANXA6,AP3M2,ARL5C,ATP5MC1,CAPRIN2,CD82,CDC14B,CDC42EP3,CERS6,CHCHD3,CLEC4E,COBL,COPG2,CSMD3,DBP,DLST,GHITM,GPR63,HNRNPU,IER3,ISLR2,JPT1,KLHL29,KLK1,LAMP1,LEMD3,MAPT,mir-128,MKI67,MRC2,NMI,NOX5,NTRK1,PHF11,PSMC3,PSMD8,PTGER4,PTPRE,PTPRU,PXN,RPL7,SLC12A2,STX12,TMCC1,TRAP1,UBE4A,USP48,WIF1,WWOX,ZEB2	51 (23)	21
DICER1		enzyme	CASP8,CCND1,DICER1,EGFR,EIF4E,ERBB2,ESR1,FOXO1,FYN,GATA1,GLI1,IRF3,Jnk,KLRB1,MET,MITF,MTOR,MXD1,NCR1,NFATC1,PARP1,PRKAA1,SP1,SPI1,STAT5a/b,STAT6,SYK,TP53,TP73,TSC2	3		-0.944	0.000123	0.0004	AHI1,ANXA6,ARL5C,ATP5MC1,CAD,CAPRIN2,CD82,CDC14B,CDC42EP3,CDK5RAP3,CERS6,CLEC4E,COX7A2L,CSMD3,DBP,DLST,FAM186A,GPR63,GREB1L,IER3,IGF2R,ISLR2,JAZF1,JPT1,KCNQ3,KLHL29,KLHL31,KLK1,LAMP1,LEF1,MAPT,mir-128,MKI67,MRC2,NELL2,NOX5,POU2F1,PSMC3,PSMD8,PTPRE,PTPRN2,PTPRU,RPA3,RPL7,RPTOR,STX12,TMCC1,TMEM131,TRAP1,UBE4A,USP48,WWOX,ZEB2,ZNF366,ZNF608	55 (30)	25
EPS8		peptidase	CCND1,CDH1,CEBPB,Creb,CTNNB1,DUSP1,EGFR,EIF4E,EPS8,ERK,Focal adhesion kinase,IKBKB,ITGB1,Jnk,MAP2K1,Mapk,MAPK1,MKNK1,MTOR,NANOG,NFkB (complex),NOS2,PLA2G4A,PPARG,PRKCD,RB1,RELA,RXRA,SRC,STAT3,STAT5a/b,STAT6,SYK,YAP1	3		-0.295	0.000121	0.0004	AHI1,AP3M2,CAD,CDC42EP3,CHCHD3,CLEC4E,COBL,COPG2,DBP,DLST,FUS,GHITM,GPR63,IGF2R,INTS1,ISLR2,JPT1,KLHL31,LAMP1,LEF1,LEMD3,MAPT,MKI67,MRC2,MYO1D,NELL2,NOX5,NTRK1,PHF11,PTGER4,PXN,RCAN3,RPA3,RPTOR,SFXN1,SH2D2A,SIDT1,STX12,TBXAS1,TMCC1,TMEM131,UBE4A,VAMP5,WIF1,WWOX,ZNF608	46 (34)	30
HRAS		enzyme	AR,CCND1,CEBPB,CHUK,CXCR4,DUSP1,EGFR,EIF3A,EIF4E,ELAVL1,ERK,ERK1/2,GATA1,GLI1,HRAS,IKBKB,IKK (complex),IRF3,Jnk,JUN,LIN28A,MAPK1,MAPK3,MED1,Mek,MTOR,NCL,NFE2L2,NFkB (complex),PARP1,PPARG,PRKAA1,RALA,RARA,RB1,RELA,RICTOR,RPS6KB1,SP1,STAT3,TCF7L2,TP53,TP73	3		0.254	0.000107	0.0016	AHI1,ANKS1B,ANXA6,AP3M2,ARL5C,ATP5MC1,CAD,CAPRIN2,CERS6,CHCHD3,CLEC4E,COBL,COPG2,COX7A2L,CSMD3,FAM186A,FUS,GABRA1,GHITM,GPR63,HECW2,IGF2R,ILDR2,ISLR2,JAZF1,JPT1,KCNQ3,KLHL29,KLK1,LAMP1,LEMD3,MAPT,MKI67,MRC2,MYO1D,NELL2,NMI,NOX5,NRSN1,PHF11,PITRM1,POU2F1,PSMC3,PSMD8,PTGER4,PTPRE,PTPRN2,PTPRU,RAD51C,RCAN3,RPA3,RPTOR,S100A13,SH2D2A,STX12,TMCC1,TRAP1,UBE4A,USP48,VAMP5,WWOX,ZNF366	62 (43)	36
NEK4	0.556	kinase	CCND1,CYP19A1,EIF4E,ERBB2,FOXO3,GLI1,H2AX,Jnk,JUN,MAPK1,MAPK14,MAPK9,MTOR,NEK4,PARP1,PRKAA1,RB1,RELA,STAT3,TP53,TP73,TSC2	3		0.687	9.82e-05	0.0001	AHI1,ANXA6,AP3M2,ARL5C,ATP5MC1,CAPRIN2,CD82,CDC14B,CDC42EP3,CERS6,CHCHD3,CLEC4E,COBL,COPG2,CSMD3,DBP,DLST,GHITM,GPR63,HNRNPU,IER3,ISLR2,JPT1,KLHL29,KLK1,LAMP1,LEMD3,MAPT,mir-128,MKI67,MRC2,NELL2,NMI,NTRK1,PHF11,POU2F1,PSMC3,PSMD8,PTGER4,PTPRE,PTPRU,PXN,RCAN3,RPL7,SLC12A2,STX12,TMCC1,TRAP1,UBE4A,USP48,WIF1,WWOX,ZEB2	53 (22)	20
PTPRS		phosphatase	Cdc42,CEBPA,Creb,CREB1,CTNNB1,EGFR,EGR1,estrogen receptor,FOXO1,IKBKB,IKK (complex),Jnk,JUN,MAPK1,MAPK14,NFkB (complex),PARP1,PTPRS,RELA,SP1,STAT3,STAT6,TP53	3		-0.295	8.78e-05	0.0004	ANXA6,AP3M2,ATP5MC1,CAD,CDC42EP3,CDK5RAP3,CERS6,CLEC4E,COBL,COPG2,CSMD3,DBP,DLST,GPR63,HNRNPU,IER3,IGF2R,INTS1,KCNQ3,LAMP1,LEMD3,MAPT,mir-128,MKI67,MRC2,MYO1D,NELL2,NMI,NOX5,PHF11,POU2F1,PSMD8,PTGER4,PTPRE,PTPRU,PXN,RAD51C,RCAN3,RPL7,SLC12A2,TBXAS1,TMEM131,TRAP1,WIF1,ZEB2,ZNF608	46 (23)	22
G Protein I		complex	Akt,CDKN1B,CEBPA,CEBPB,Creb,DUSP1,EGFR,EP300,ERK1/2,EZH2,FLNA,FOXO1,G Protein I,GATA1,IKBKB,IKK (complex),IRF3,ITGB1,Jnk,JUN,LIN28A,MAPK1,MAPK3,MED1,MTOR,NFAT5,NFE2L2,NFkB (complex),NRAS,PARP1,PPARGC1A,PRKAA1,RAP1B,RARA,RB1,RELA,SP1,SPHK1,STAT3,TSC2	3		-0.412	8.37e-05	0.0004	AP3M2,CAD,CDK5RAP3,CHCHD3,CLEC4E,COBL,COPG2,DBP,DLST,FAM186A,FUS,GABRA1,GHITM,GPR63,HDGFL3,HECW2,HNRNPU,IGF2R,INTS1,ISLR2,JAZF1,JPT1,KCNQ3,KLHL29,MAPT,MKI67,MRC2,MYO1D,NELL2,NMI,NOX5,NPR3,NRSN1,NTRK1,PHF11,POU2F1,PSMC3,PTGER4,PTPRE,PXN,RAD51C,RCAN3,RPA3,RPTOR,S100A13,SH2D2A,SIDT1,STX12,TBXAS1,TMCC1,TMEFF2,TRIM11,ZNF366	53 (40)	35
CHEK		group	CCND1,CHEK,CHEK1,CYP19A1,E2F3,EIF4E,ERBB2,FOXO3,GLI1,H2AX,Jnk,JUN,MAPK1,MAPK14,MAPK9,MTOR,PARP1,PRKAA1,RB1,RELA,STAT3,TP53,TP73,TSC2	3		-0.816	7.69e-05	0.0002	AHI1,ANXA6,AP3M2,ARL5C,ATP5MC1,CAPRIN2,CD82,CDC14B,CDC42EP3,CERS6,CHCHD3,CLEC4E,COBL,COPG2,CSMD3,DBP,DLST,GHITM,GPR63,HNRNPU,IER3,ISLR2,JPT1,KLHL29,KLK1,LAMP1,LEMD3,MAPT,mir-128,MKI67,MRC2,NEAT1,NELL2,NMI,NTRK1,PHF11,POU2F1,PSMC3,PSMD8,PTGER4,PTPRE,PTPRU,PXN,RCAN3,RPL7,SLC12A2,STX12,TMCC1,TRAP1,UBE4A,USP48,WIF1,WWOX,ZEB2	54 (24)	21
INS		other	Akt,AKT1,AKT2,AR,CBL,CCND1,CDKN1B,CREB1,DUSP1,ERBB2,ERK,ERK1/2,ERN1,ESR1,EZH2,FOXA2,FOXO1,FOXO3,FOXO4,GATA1,HNF1A,IKBKB,INS,INSR,JAK2,Jnk,KRAS,LIN28A,MAP2K7,Mapk,MAPK1,MAPK14,MAPK3,MED1,MEF2C,MKNK1,MTOR,MTORC1,NCF1,NFAT5,NOS2,NRAS,P38 MAPK,PAK2,PARP1,PFKFB1,PI3K (complex),PIK3R1,PRKCZ,PTK2,RARA,RB1,RICTOR,RPS6KB1,Rsk,SIRT1,SP1,STAT5B,STAT6,TSC2,YAP1	3		-1.27	7.37e-05	0.0013	AHI1,ANKS1B,ATP5MC1,BLK,CAD,CAMK1,CDC14B,CDC42EP3,CDK5RAP3,CERS6,CHCHD3,COX7A2L,DBP,DIP2B,DLST,FAM186A,FUS,GHITM,GMDS,GPR63,HDGFL3,HECW2,HYAL3,IER3,IGF2R,ILDR2,ISLR2,JAZF1,KCNQ3,LEF1,LEMD3,LRCH1,MAP2K4,MAPT,MELTF,MKI67,MRC2,MYO1D,NELL2,NMI,NOX5,NPR3,PHF11,PITRM1,POU2F1,PSMC3,PTPRE,RCAN3,SFXN1,SH2D2A,SLC12A2,SMAD9,STX12,TBXAS1,TMCC1,TMEFF2,TMEM131,TRIM11,WWOX,ZEB2,ZNF366,ZNF608	62 (61)	45
S100A6		transporter	APP,AR,CCND1,EIF4E,ERBB2,FOXO1,GLI1,IKBKB,Jnk,JUN,MAP2K1,MAPK14,MAPK9,MTOR,NFE2L2,NFkB (complex),PLA2G4A,PRKAA1,RB1,RELA,RICTOR,S100A6,SP1,STAT3,STAT6,TP53,TP73,TSC2	3		-1.549	5.14e-05	0.0004	AHI1,ANXA6,AP3M2,ARL5C,ATP5MC1,CAPRIN2,CD82,CDC14B,CDC42EP3,CDK5RAP3,CERS6,CHCHD3,CLEC4E,COBL,COPG2,COX7A2L,CSMD3,DBP,DLST,GABRA1,GHITM,GPR63,HNRNPU,IER3,ILDR2,ISLR2,JPT1,KCNQ3,KLHL29,KLK1,LAMP1,MAPT,mir-128,MKI67,MRC2,MYO1D,NMI,NOX5,NRSN1,NTRK1,PHF11,PITRM1,PSMC3,PSMD8,PTGER4,PTPRE,PTPRU,RPL7,S100A13,SLC12A2,STX12,TMCC1,TMEM131,TRAP1,UBE4A,USP48,WIF1,WWOX,ZEB2,ZNF608	60 (28)	27
LAT		other	AMPK,CEBPA,CEBPB,Creb,CTNNB1,DUSP1,EGFR,ERK1/2,ERN1,GATA1,IKBKB,IKK (complex),INSR,IRF3,ITGB1,ITK,Jnk,JUN,LAT,LCP2,LIN28A,MAPK1,MAPK14,MAPK3,MAPK8,MED1,MKNK1,MTOR,NCL,NFE2L2,NFkB (complex),PARP1,PLCG1,PLCG2,PRKAA1,PRKAA2,RARA,RB1,RELA,SIRT1,SP1,STAT3,TP53	3		-0.775	4.47e-05	0.0004	ANXA6,AP3M2,ATP5MC1,CAD,CERS6,CHCHD3,CLEC4E,COBL,COPG2,CSMD3,DBP,DLST,FAM186A,FUS,GABRA1,GHITM,HECW2,HNRNPU,IER3,IGF2R,INTS1,ISLR2,JAZF1,JPT1,KCNQ3,KLHL29,LAMP1,LEF1,LRCH1,mir-128,MKI67,MRC2,MYO1D,NELL2,NMI,NOX5,NRSN1,NTRK1,PHF11,POU2F1,PSMC3,PSMD8,PTGER4,PTPRE,PTPRU,PXN,RAD51C,RCAN3,RPA3,RPL7,RPTOR,S100A13,SH2D2A,SIDT1,STX12,TBXAS1,TMCC1,TRAP1,UBE4A,ZNF366	60 (43)	37
ERBB4		kinase	Akt,CCND1,CDKN1B,CEBPB,Creb,DUSP1,EIF4E,EP300,ERBB2,ERBB4,ERK,ERK1/2,ESR1,estrogen receptor,EZH2,FOXO1,GATA1,Hsp27,IKBKB,IRF3,JUN,KRAS,LIN28A,MAPK1,MAPK3,MED1,MTOR,MXD1,NFAT5,NFE2L2,NFkB (complex),NOS2,NRAS,PARP1,PI3K (complex),PPARG,PPARGC1A,PRKAA1,RARA,RELA,RXRA,SP1,STAT3,STAT5A,STAT5a/b,STAT5B,TP53,TSC2	3		0.75	4.46e-05	0.0005	AHI1,ANKS1B,ANXA6,AP3M2,ATP5MC1,CAMK1,CDC14B,CDC42EP3,CDK5RAP3,CERS6,CLEC4E,COBL,COPG2,COX7A2L,CSMD3,DIP2B,FAM186A,FUS,GABRA1,HDGFL3,HECW2,HNRNPU,IGF2R,INTS1,ISLR2,JAZF1,JPT1,KCNQ3,KLHL29,LAMP1,MAPT,mir-128,MKI67,MYO1D,NELL2,NMI,NOX5,NPR3,NRSN1,NTRK1,PHF11,POU2F1,PSMC3,PSMD8,PTGER4,PTPRE,PTPRU,PXN,RCAN3,RPA3,RPL7,RPTOR,S100A13,SFXN1,SH2D2A,STX12,TMCC1,TMEFF2,TRAP1,TRIM11,UBE4A,VAMP5,WWOX,ZNF366	64 (48)	42
CRK		other	CCND1,Cdc42,CEBPB,Creb,CRK,DUSP1,EGFR,EIF4E,ERK,ESR1,GSK3B,H/K/NRAS,Jnk,LCP2,LIN28A,MAPK1,MAPK14,MAPK3,MTOR,NFAT5,NFE2L2,NFkB (complex),NOS2,PARP1,PPARG,RAC1,RARA,RELA,RXRA,TP53,VAV1	3		0.42	4.01e-05	0.0004	AHI1,ANXA6,AP3M2,ATP5MC1,CAD,CD82,CERS6,CLEC4E,CSMD3,DLST,FAM186A,FUS,GABRA1,GPR63,HECW2,INTS1,ISLR2,JPT1,LAMP1,LEF1,LEMD3,MAPT,mir-128,MKI67,MRC2,NELL2,NMI,NOX5,NRSN1,NTRK1,PHF11,POU2F1,PSMC3,PSMD8,PTGER4,PTPRU,PXN,RCAN3,RPA3,RPL7,S100A13,SFXN1,SH2D2A,STX12,TBXAS1,TMCC1,TRAP1,UBE4A,VAMP5,WIF1,WWOX	51 (31)	25
PTGER3		G-protein coupled receptor	CEBPA,CEBPB,Creb,CTNNB1,DUSP1,EGFR,ERK1/2,GATA1,GSK3B,JUN,KDM1A,KDM5A,KDM5B,LIN28A,MAPK1,MAPK14,MAPK3,MED1,MTOR,NFE2L2,NFkB (complex),PARP1,PRKAA1,PTGER3,RARA,RELA,RHOA,SP1,STAT3,TP53	3		-0.267	3.55e-05	0.0003	ANXA6,AP3M2,ATP5MC1,BBS9,CAD,CD82,CERS6,CHCHD3,CLEC4E,COBL,COPG2,CSMD3,FAM186A,FOXN4,FUS,GABRA1,GHITM,GPR63,HECW2,HNRNPU,IGF2R,INTS1,ISLR2,JAZF1,JPT1,KCNQ3,KLHL29,LEF1,LEMD3,MAPT,mir-128,MKI67,NELL2,NMI,NOX5,NRSN1,NTRK1,PHF11,POU2F1,PSMC3,PSMD8,PTGER4,PTPRE,PTPRU,PXN,RCAN3,RPA3,RPL7,S100A13,SH2D2A,STX12,TBXAS1,TMCC1,TRAP1,ZEB2,ZNF366	56 (30)	27
KLF5		transcription regulator	CCND1,Cdc42,CEBPB,Creb,DUSP1,EGFR,EIF4E,ERK,IKBKB,ILK,JUN,KLF5,MAPK14,MTOR,NFkB (complex),NOS2,NOTCH1,PARP1,PPARG,RELA,RICTOR,RXRA,Smad2/3,STAT3	3		0.316	2.69e-05	0.0001	AHI1,AP3M2,CAD,CDC42EP3,CLEC4E,COBL,COPG2,COX7A2L,HNRNPU,IER3,INTS1,ISLR2,JAZF1,JPT1,LAMP1,LEF1,LEMD3,MAPT,mir-128,MYO1D,NEGR1,NELL2,NMI,NTRK1,POU2F1,PSMC3,PSMD8,PTGER4,PXN,RPA3,RPL7,SFXN1,SH2D2A,STX12,TBXAS1,TMCC1,UBE4A,VAMP5,WIF1,WWOX	40 (24)	22
FPR2		G-protein coupled receptor	APP,AR,CaMKII,CCND1,Cdc42,CEBPB,Creb,DUSP1,EGFR,EIF4E,ERK,FOXO1,FPR2,IKBKB,IRF3,Jnk,JUN,MAP2K7,MAP3K7,MAPK9,MTOR,NFE2L2,NFkB (complex),NOS2,PLA2G4A,PPARG,RELA,RICTOR,RXRA,Smad2/3,SP1,STAT3,STAT6,TCF,TP53,YAP1	3		0.135	2.3e-05	0.0002	AHI1,ANXA6,AP3M2,ATP5MC1,CAD,CDC42EP3,CDK5RAP3,CERS6,CLEC4E,COBL,COPG2,COX7A2L,CSMD3,DBP,DLST,GABRA1,GPR63,HNRNPU,ILDR2,INTS1,ISLR2,JPT1,KCNQ3,LAMP1,LEF1,LEMD3,MAP2K4,MAPT,mir-128,MRC2,MYO1D,NMI,NOX5,NRSN1,NTRK1,PHF11,PITRM1,PSMC3,PSMD8,PTGER4,PTPRU,PXN,RPA3,RPTOR,SFXN1,SH2D2A,STX12,TBXAS1,TMCC1,TMEM131,TRAP1,UBE4A,VAMP5,WWOX,ZNF608	55 (36)	32
GPS1		other	APP,AR,FOXO1,GATA1,GPS1,IKBKB,Jnk,JUN,MTOR,NFE2,NFE2L2,NFkB (complex),PLA2G4A,RICTOR,Smad2/3,SP1,STAT6,TCF,TP53,YAP1	3		0.457	0.00225	0.007	ANXA6,ATP5MC1,CDC42EP3,CDK5RAP3,CERS6,CLEC4E,COX7A2L,CSMD3,DBP,DLST,GABRA1,GPR63,HNRNPU,IGF2R,ILDR2,ISLR2,JAZF1,KCNQ3,LEF1,LEMD3,MAPT,mir-128,MKI67,MRC2,MYO1D,NOX5,NRSN1,PHF11,PITRM1,PSMC3,PSMD8,PTPRU,PXN,S100A13,SLC12A2,STX12,TBXAS1,TMCC1,TMEM131,TRAP1,ZEB2,ZNF366,ZNF608	43 (20)	19
NYAP2		other	Akt,CDKN1B,Creb,CREB1,EIF4E,EP300,ERN1,EZH2,FOXO1,FOXO3,IKBKB,IRF3,Jnk,JUN,KRAS,MAPK1,MKNK1,MTOR,NFAT5,NFkB (complex),NOS2,NRAS,NYAP2,PI3K (complex),PIK3R1,PPARGC1A,PTEN,RAC1,RB1,RELA,SP1,STAT3,TP53,TSC2	3		0	0.00223	0.0108	ANXA6,AP3M2,ATP5MC1,CAD,CAMK1,CDC42EP3,CDK5RAP3,CERS6,CHCHD3,CLEC4E,COBL,COPG2,CSMD3,GHITM,HDGFL3,HECW2,HNRNPU,IGF2R,INTS1,ISLR2,KCNQ3,LEMD3,MAPT,mir-128,MKI67,MRC2,MYO1D,NELL2,NMI,NPR3,PSMC3,PSMD8,PTGER4,PTPRU,RAD51C,RCAN3,RPA3,RPL7,RPTOR,SFXN1,STX12,TMCC1,TMEFF2,TRAP1,TRIM11,UBE4A	46 (34)	29
MYO16		other	Akt,CDKN1B,Creb,CREB1,EIF4E,EP300,ERN1,EZH2,FOXO1,FOXO3,IKBKB,IRF3,Jnk,JUN,KRAS,MAPK1,MKNK1,MTOR,MYO16,NFAT5,NFkB (complex),NOS2,NRAS,PI3K (complex),PIK3R1,PPARGC1A,PTEN,RAC1,RB1,RELA,SP1,STAT3,TP53,TSC2	3		0	0.00223	0.0108	ANXA6,AP3M2,ATP5MC1,CAD,CAMK1,CDC42EP3,CDK5RAP3,CERS6,CHCHD3,CLEC4E,COBL,COPG2,CSMD3,GHITM,HDGFL3,HECW2,HNRNPU,IGF2R,INTS1,ISLR2,KCNQ3,LEMD3,MAPT,mir-128,MKI67,MRC2,MYO1D,NELL2,NMI,NPR3,PSMC3,PSMD8,PTGER4,PTPRU,RAD51C,RCAN3,RPA3,RPL7,RPTOR,SFXN1,STX12,TMCC1,TMEFF2,TRAP1,TRIM11,UBE4A	46 (34)	29
NYAP1		other	Akt,CDKN1B,Creb,CREB1,EIF4E,EP300,ERN1,EZH2,FOXO1,FOXO3,IKBKB,IRF3,Jnk,JUN,KRAS,MAPK1,MKNK1,MTOR,NFAT5,NFkB (complex),NOS2,NRAS,NYAP1,PI3K (complex),PIK3R1,PPARGC1A,PTEN,RAC1,RB1,RELA,SP1,STAT3,TP53,TSC2	3		0	0.00223	0.0108	ANXA6,AP3M2,ATP5MC1,CAD,CAMK1,CDC42EP3,CDK5RAP3,CERS6,CHCHD3,CLEC4E,COBL,COPG2,CSMD3,GHITM,HDGFL3,HECW2,HNRNPU,IGF2R,INTS1,ISLR2,KCNQ3,LEMD3,MAPT,mir-128,MKI67,MRC2,MYO1D,NELL2,NMI,NPR3,PSMC3,PSMD8,PTGER4,PTPRU,RAD51C,RCAN3,RPA3,RPL7,RPTOR,SFXN1,STX12,TMCC1,TMEFF2,TRAP1,TRIM11,UBE4A	46 (34)	29
GAB1		other	Akt,AR,CCND1,CDKN1B,CEBPB,Creb,DUSP1,EGFR,EIF4E,ERK,ERK1/2,ESR1,EZH2,GAB1,GATA1,H/K/NRAS,Hsp27,IKBKB,IKK (complex),IRS2,ITGB1,Jnk,LIN28A,Mapk,MAPK1,MAPK3,MAPK8,MED1,MITF,MKNK1,MTOR,NFAT5,NFkB (complex),NFKBIA,NOS2,P38 MAPK,PARP1,PPARGC1A,PRKAA1,PRKCD,RARA,RB1,RICTOR,RXRA,SIRT1,SP1,SRC,STAT3,STAT6,SYK	3		-1.26	0.00223	0.0167	AHI1,CAD,CD82,CHCHD3,CLEC4E,COBL,COPG2,COX7A2L,DBP,FAM186A,FUS,GHITM,HDGFL3,HECW2,IER3,ILDR2,INTS1,ISLR2,JAZF1,JPT1,KCNQ3,KLHL29,KLHL31,LAMP1,LRCH1,MKI67,MRC2,MYO1D,NELL2,NMI,NOX5,NTRK1,PHF11,PITRM1,POU2F1,PTPRE,PXN,RAD51C,RCAN3,RPA3,SFXN1,SH2D2A,SIDT1,STX12,TMCC1,TMEFF2,TMEM131,UBE4A,WWOX,ZNF366,ZNF608	51 (50)	41
MBIP		other	APP,AR,FOXO1,GATA1,IKBKB,Jnk,JUN,MBIP,MTOR,NFE2,NFE2L2,NFkB (complex),PLA2G4A,RICTOR,Smad2/3,SP1,STAT6,TCF,TP53,YAP1	3		0.457	0.00221	0.007	ANXA6,ATP5MC1,CDC42EP3,CDK5RAP3,CERS6,CLEC4E,COX7A2L,CSMD3,DBP,DLST,GABRA1,GPR63,HNRNPU,IGF2R,ILDR2,ISLR2,JAZF1,KCNQ3,LEF1,LEMD3,MAPT,mir-128,MKI67,MRC2,MYO1D,NOX5,NRSN1,PHF11,PITRM1,PSMC3,PSMD8,PTPRU,PXN,S100A13,SLC12A2,STX12,TBXAS1,TMCC1,TMEM131,TRAP1,ZEB2,ZNF366,ZNF608	43 (20)	19
TRADD		other	APP,AR,CCND1,CEBPB,Creb,CREB1,DUSP1,EGFR,EIF4E,EP300,ERK,estrogen receptor,FOXO1,Hsp27,IFNB1,IKBKB,IKK (complex),Jnk,JUN,KAT5,MITF,MKNK1,MTOR,NFAT5,NFE2L2,NFkB (complex),NOS2,P38 MAPK,PLA2G4A,PPARGC1A,PRKCD,RB1,RICTOR,RIPK1,RXRA,SP1,STAT3,STAT6,TRADD,TSC2	3		-1.18	0.00219	0.0116	AHI1,CAD,CD82,CDK5RAP3,CHCHD3,CLEC4E,COBL,COPG2,COX7A2L,DBP,GABRA1,GHITM,HECW2,HNRNPU,IER3,ILDR2,INTS1,ISLR2,JPT1,KCNQ3,LAMP1,LEMD3,MAPT,MRC2,MYO1D,NELL2,NMI,NOX5,NRSN1,NTRK1,PHF11,PITRM1,PSMC3,PXN,RAD51C,RPA3,S100A13,SFXN1,SH2D2A,SIDT1,STX12,TMCC1,TMEM131,UBE4A,WWOX,ZNF608	46 (40)	37
DGKH		kinase	APP,AR,DGKH,FOXO1,GATA1,IKBKB,Jnk,JUN,MTOR,NFE2,NFE2L2,NFkB (complex),PLA2G4A,RICTOR,Smad2/3,SP1,STAT6,TCF,TP53,YAP1	3		0.457	0.00219	0.007	ANXA6,ATP5MC1,CDC42EP3,CDK5RAP3,CERS6,CLEC4E,COX7A2L,CSMD3,DBP,DLST,GABRA1,GPR63,HNRNPU,IGF2R,ILDR2,ISLR2,JAZF1,KCNQ3,LEF1,LEMD3,MAPT,mir-128,MKI67,MRC2,MYO1D,NOX5,NRSN1,PHF11,PITRM1,PSMC3,PSMD8,PTPRU,PXN,S100A13,SLC12A2,STX12,TBXAS1,TMCC1,TMEM131,TRAP1,ZEB2,ZNF366,ZNF608	43 (20)	19
ORAI1		ion channel	CCND1,CD247,CD3E,CEBPB,Creb,DUSP1,EIF4E,ERK,ERK1/2,FYN,GSK3B,Jnk,MAP2K1,MAPK1,MAPK14,MTOR,NFkB (complex),NOS2,Notch,ORAI1,PLA2G4A,PPARG,RELA,RXRA,STAT3	3		0.686	0.00218	0.0026	AHI1,AP3M2,CD82,CDC42EP3,CLEC4E,COBL,COPG2,DBP,INTS1,ISLR2,JPT1,LEMD3,MAPT,MKI67,MRC2,NMI,NOX5,NTRK1,PHF11,PTGER4,PTPRE,PXN,RCAN3,RPA3,SFXN1,SH2D2A,STX12,TBXAS1,TMCC1,UBE4A,VAMP5,WIF1,WWOX,ZEB2	34 (25)	21
NCR3		transmembrane receptor	AR,CCND1,Cdc42,CEBPA,CEBPB,Creb,EGFR,EIF4E,ERK,ERN1,FOXO1,FYN,IKK (complex),IKZF3,ITGB1,Jnk,LCK,LCP2,LIN28A,MAPK1,MAPK8,NCR3,NFE2L2,NFkB (complex),NRAS,PARP1,PPARG,PRKCD,RARA,RICTOR,SIRT1,SP1,STAT6,SYK,ZAP70	3		0.745	0.00218	0.0152	AHI1,CAD,CDK5RAP3,CLEC4E,COX7A2L,DBP,FAM186A,FUS,GABRA1,IER3,ILDR2,INTS1,JPT1,KCNQ3,KLHL31,LAMP1,LEMD3,LRCH1,MAPT,MKI67,MRC2,NELL2,NMI,NOX5,NPR3,NRSN1,PHF11,PITRM1,POU2F1,PSMC3,PTPRE,PXN,RAD51C,RCAN3,RPA3,S100A13,SEMA5A,SIDT1,TBXAS1,TMEM131,TRIM11,UBE4A,VAMP5,WWOX,ZNF608	45 (35)	30
EP300		transcription regulator	ATM,Creb,CRTC2,EP300,IKBKB,IKK (complex),IRF3,Jnk,JUN,MAPK1,MEF2D,MTOR,PARP1,RB1,SIRT1,STAT3	3		1.043	0.00218	0.0017	BLK,CHCHD3,COBL,COPG2,GHITM,HNRNPU,IGF2R,INTS1,ISLR2,LRCH1,MAPT,MRC2,MYO1D,NELL2,NMI,PHF11,POU2F1,RAD51C,RCAN3,RPTOR,SLC12A2,STX12,TMCC1	23 (16)	14
FASLG		cytokine	CEBPA,CEBPB,Creb,CTNNB1,EGFR,EIF4E,ERK1/2,ERN1,FASLG,FYN,GATA1,Hsp27,IKBKB,IKK (complex),INSR,ITGB1,Jnk,JUN,MAPK8,MED1,MET,MITF,MKNK1,MTOR,NCF1,NFAT5,NFkB (complex),NOS2,P38 MAPK,PPARG,PPARGC1A,PRKAA1,PRKCD,PTK2B,RB1,RELA,SIRT1,SP1,SRC,STAT3,STAT6,SYK,TP53,YES1	3		-1.633	0.00217	0.0162	ANXA6,AP3M2,ATP5MC1,CAD,CD82,CERS6,CHCHD3,CLEC4E,COBL,COPG2,CSMD3,DBP,DLST,GHITM,HECW2,HNRNPU,HYAL3,IER3,INTS1,ISLR2,JAZF1,JPT1,KCNQ3,KLHL29,KLHL31,LAMP1,LEF1,LEMD3,LRCH1,MAPT,mir-128,MRC2,MYO1D,NELL2,NTRK1,PSMD8,PTGER4,PTPRE,PXN,RAD51C,RPA3,RPL7,SFXN1,SIDT1,STX12,TBXAS1,TMCC1,TMEM131,TRAP1,UBE4A,VAMP5,WIF1,ZNF366,ZNF608	54 (44)	39
S1PR2		G-protein coupled receptor	Akt,CCND1,Cdc42,CDKN1B,CEBPB,Creb,DUSP1,EGFR,EIF4E,EP300,ERK,ERK1/2,estrogen receptor,EZH2,FOXO1,GATA1,IKBKB,IRF3,Jnk,MAPK1,MED1,MTOR,NFAT5,NFkB (complex),NOS2,PAK2,PARP1,PPARG,PPARGC1A,PRKAA1,PTK2,Ras homolog,RB1,RELA,S1PR2,SP1,STAT3,STAT6,TSC2	3		-0.146	0.00215	0.0111	AHI1,AP3M2,CAD,CDK5RAP3,CHCHD3,CLEC4E,COBL,COPG2,DBP,GHITM,HDGFL3,HECW2,IER3,INTS1,ISLR2,JAZF1,JPT1,KCNQ3,KLHL29,LAMP1,LEF1,MAPT,MRC2,MYO1D,NELL2,NMI,POU2F1,PSMC3,PTGER4,PTPRE,PXN,RCAN3,RPA3,RPTOR,SFXN1,SH2D2A,SMAD9,STX12,TMCC1,TMEFF2,TMEM131,UBE4A,VAMP5,WWOX,ZEB2,ZNF366,ZNF608	47 (39)	34
IgG2a		complex	CCND1,CEBPB,Creb,CREB1,CTNNB1,DUSP1,EIF4E,ERK,ERK1/2,ERN1,ESR1,FOXO1,Hsp27,IgG2a,IRF3,Jnk,KRAS,MAP2K1,MAPK1,MTOR,NFkB (complex),NOS2,NRAS,PI3K (complex),Pka,PLA2G4A,PPARG,RB1,RELA,RHO,RXRA,SP1,STAT3,STAT5a/b	3		-0.457	0.00215	0.0066	AHI1,AP3M2,CAD,CAMK1,CDK5RAP3,CHCHD3,CLEC4E,COBL,COPG2,DBP,DLST,FAM186A,GHITM,GPR63,INTS1,ISLR2,JPT1,KCNQ3,LEF1,MAPT,MKI67,MRC2,NMI,NOX5,NPR3,NTRK1,PDC,PTGER4,PTPRE,PXN,RCAN3,RPA3,RPTOR,SFXN1,SH2D2A,STX12,TBXAS1,TMCC1,TRIM11,UBE4A,VAMP5,WIF1,WWOX	43 (34)	30
ARRB1		transcription regulator	ADRB2,AKT1,AR,ARRB1,CCND1,CDH1,CEBPB,CREB1,CTNNB1,DRD2,DUSP1,EGFR,EIF4E,ERBB2,ERK,ERK1/2,EZH2,GATA1,GNAQ,IGF1R,IKBKB,ITGB1,Jnk,LEF1,LIN28A,MAP2K7,MAPK1,MAPK14,MED1,MKNK1,NFE2L2,NOS2,Nr1h,NR3C1,PAK2,PARP1,Pka,PPARG,PTK2,RELA,RHO,RICTOR,SP1,SRC,STAT3,STAT5B,SYK,TNF,TP73	3		0.944	0.00215	0.0176	AHI1,ANKS1B,AP3M2,ARHGEF10L,ARL5C,ATP5MC1,CAD,CDC14B,CDC42EP3,COBL,COPG2,COX7A2L,DIP2B,FUS,GABRA1,HDGFL3,HECW2,HLA-DOB,IER3,IGF2R,ILDR2,JAZF1,JPT1,KCNQ3,KLHL31,MAP2K4,MKI67,MRC2,MYO1D,NELL2,NMI,NOX5,NRSN1,NTN4,PDC,PHF11,PITRM1,PLPP1,POU2F1,PTGER4,PTPRE,PXN,RCAN3,RPA3,RPTOR,S100A13,SFXN1,SH2D2A,SIDT1,SMAD9,UBE4A,VAMP5,WIF1,WWOX,ZNF366	55 (49)	41
HPSE		enzyme	Akt,CCND1,Cdc42,CDKN1B,CEBPB,Creb,DUSP1,EGFR,EIF4E,EP300,ERK,ERK1/2,EZH2,FOXO1,GATA1,HPSE,Hsp27,IKBKB,ITGB1,Jnk,JUN,KAT5,Mapk,MAPK1,MED1,MITF,MKNK1,MTOR,NFAT5,NFkB (complex),NOS2,P38 MAPK,PARP1,PPARGC1A,PRKAA1,PRKCD,RB1,RELA,RXRA,SP1,SRC,STAT3,SYK,TP53,TSC2	3		-1.511	0.00214	0.0146	AHI1,ANXA6,AP3M2,ATP5MC1,CAD,CD82,CDK5RAP3,CERS6,CHCHD3,CLEC4E,COBL,COPG2,CSMD3,DBP,DLST,GHITM,HDGFL3,HECW2,HNRNPU,IER3,INTS1,ISLR2,JAZF1,JPT1,KCNQ3,KLHL29,KLHL31,LAMP1,MAPT,mir-128,MRC2,MYO1D,NELL2,NTRK1,POU2F1,PSMC3,PSMD8,PTGER4,PTPRE,RCAN3,RPA3,RPL7,SFXN1,SH2D2A,SIDT1,STX12,TMCC1,TMEFF2,TRAP1,UBE4A,WWOX,ZEB2,ZNF366	53 (45)	41
FSHR		G-protein coupled receptor	Akt,AMPK,CDKN1B,EP300,ERK1/2,ERN1,EZH2,FOXO1,FOXO3,FSHR,IRF3,Jnk,JUN,MAPK1,MED1,MKNK1,MTOR,NFAT5,NFkB (complex),PPARGC1A,PRKAA2,RB1,RELA,SP1,STAT3,STAT5a/b,TSC2,YAP1	3		-0.324	0.00214	0.0045	AP3M2,CAD,CDC42EP3,CDK5RAP3,CHCHD3,CLEC4E,COBL,COPG2,DBP,DLST,GHITM,GPR63,HDGFL3,HECW2,HNRNPU,IGF2R,ISLR2,KCNQ3,KLHL29,LEMD3,MAPT,MKI67,MRC2,NELL2,NMI,NOX5,NPR3,PHF11,PSMC3,PTGER4,PTPRE,PXN,RCAN3,RPA3,RPTOR,STX12,TMCC1,TMEFF2	38 (28)	26
GRK2		kinase	ADRB2,Akt,CDKN1B,CEBPA,CEBPB,Creb,DRD2,DUSP1,EIF4E,ERK1/2,EZH2,FOXO1,GATA1,GRK2,GSK3A,Hsp27,IKBKB,INSR,IRF3,Jnk,JUN,LIN28A,MAPK1,MAPK8,MAPT,MED1,MITF,MKNK1,MTOR,MYC,NFAT5,P38 MAPK,PARP1,PPARG,PPARGC1A,PRKAA1,RARA,RB1,RELA,SIRT1,SP1,SSTR2,STAT5B,TNF,TP53,TSC2	3		1.214	0.00211	0.0195	ANKS1B,ANXA6,AP3M2,ARHGEF10L,ATP5MC1,CD82,CDK5RAP3,CERS6,CHCHD3,CSMD3,DIP2B,DLST,FAM186A,FUS,GABRA1,GHITM,HDGFL3,HECW2,HNRNPU,IER3,IGF2R,INTS1,ISLR2,JAZF1,JPT1,KCNQ3,KLHL29,LRCH1,MAP2K4,mir-128,MRC2,MYO1D,NELL2,NMI,NOX5,NTRK1,PHF11,PLPP1,PSMC3,PSMD8,PTGER4,PTPRE,RCAN3,RPA3,RPTOR,RTN2,SH2D2A,STX12,TBXAS1,TMCC1,TMEFF2,TRAP1,UBE4A,VAMP5,ZNF366	55 (46)	38
IGFBP1		other	Akt,CDKN1B,Creb,DUSP1,EIF4E,EZH2,Focal adhesion kinase,FOXO1,FOXO3,IGF1R,IGFBP1,IKBKB,LIN28A,MAPK1,MAPK3,MMP9,MTOR,MYC,NANOG,NFAT5,NFE2L2,PAK2,PARP1,PPARGC1A,PRKAA1,PTK2,RB1,RELA,SP1,SRC (family),STAT6,TLR3,TP53	3		0.885	0.00209	0.0161	ANXA6,AP3M2,ATP5MC1,CDK5RAP3,CERS6,CHCHD3,CSMD3,DLST,FUS,GABRA1,GHITM,GLRX3,HDGFL3,HECW2,IGF2R,INTS1,ISLR2,KCNQ3,KLHL29,LEMD3,mir-128,MKI67,MYO1D,NELL2,NMI,NOX5,NRSN1,PHF11,POU2F1,PSMD8,PTGER4,PTPRU,RCAN3,RPA3,RPL7,RTN2,S100A13,SH2D2A,SMAD9,STX12,TMCC1,TMEFF2,TMEM131,TRAP1,UBE4A,ZNF608	46 (33)	26
EIF2S1		translation regulator	CCND1,CEBPB,Creb,DUSP1,EIF2S1,EIF4E,ERK,ERK1/2,GSK3B,MTOR,MTORC1,NFkB (complex),NOS2,Notch,PLA2G4A,PPARG,RICTOR,RXRA,SREBF1,STAT3	3		-0.174	0.00207	0.0023	AHI1,ATP5MC1,CD82,CDC42EP3,CLEC4E,COBL,COPG2,COX7A2L,DBP,INTS1,ISLR2,JPT1,LEMD3,MAPT,MKI67,NOX5,NTRK1,PHF11,PSMC3,PSMD8,PTPRE,RPA3,RPL7,S100A13,SFXN1,SH2D2A,STX12,TBXAS1,TMCC1,UBE4A,VAMP5,WWOX,ZEB2	33 (20)	17
SDF4		other	APP,AR,ATP2A2,ERN1,FOXO1,IKBKB,Jnk,JUN,MTOR,NFE2L2,NFkB (complex),PLA2G4A,PPARG,RICTOR,SDF4,Smad2/3,SP1,STAT6,TCF,TP53,YAP1	3		-0.309	0.00207	0.0062	ANXA6,ATP5MC1,CAD,CDC42EP3,CDK5RAP3,CERS6,CLEC4E,COX7A2L,CSMD3,DBP,DLST,GABRA1,GPR63,HNRNPU,ILDR2,ISLR2,KCNQ3,LEF1,LEMD3,MAPT,mir-128,MKI67,MRC2,MYO1D,NOX5,NRSN1,PHF11,PITRM1,PSMC3,PSMD8,PTPRU,PXN,S100A13,SLC12A2,STX12,TBXAS1,TMCC1,TMEM131,TRAP1,VAMP5,ZEB2,ZNF608	42 (21)	19
FSH		complex	Akt,Creb,CREB1,CYP19A1,EIF4E,EZH2,FOXO1,FOXO3,FSH,FSHR,IRF3,JUN,MAPK1,MMP2,MMP9,MTOR,NFAT5,NFkB (complex),PPARGC1A,PRKAA1,PRKAA2,RARA,RB1,RELA,SP1,STAT3,STAT5B,STAT6,TP53,TSC2	3		0.885	0.00204	0.0078	ANKS1B,ANXA6,AP3M2,ATP5MC1,CDK5RAP3,CERS6,CHCHD3,CLEC4E,COBL,COPG2,CSMD3,DIP2B,FAM186A,GHITM,GPR63,HDGFL3,HECW2,HNRNPU,IGF2R,INTS1,ISLR2,KCNQ3,KLHL29,LEMD3,mir-128,MKI67,NMI,NOX5,NPR3,NTRK1,PHF11,PSMC3,PSMD8,PTGER4,PTPRU,PXN,RCAN3,RPA3,RPL7,RPTOR,STX12,TMCC1,TMEM131,TRAP1,UBE4A,ZNF608	46 (30)	26
TRAF4		other	Akt,Cdc42,CDKN1B,Creb,EGFR,EP300,EZH2,FOXO1,FOXO3,IKKA/B,INSR,IRF3,IRS1,Jnk,JUN,MAPK7,MEF2C,MEF2D,MTOR,NFAT5,NFkB (complex),PARP1,PI3K (family),PPARG,PPARGC1A,RAC1,RB1,RELA,SP1,STAT3,STAT6,TP53,TRAF4,TSC2	3		-0.295	0.00202	0.0086	ANXA6,AP3M2,ATP5MC1,BLK,CAD,CDC42EP3,CDK5RAP3,CERS6,CHCHD3,CLEC4E,COBL,COPG2,CSMD3,GHITM,GPR63,HDGFL3,HECW2,HNRNPU,INTS1,ISLR2,KCNQ3,LAMP1,LEMD3,MAPT,mir-128,MRC2,NELL2,POU2F1,PSMC3,PSMD8,PTGER4,PTPRE,PTPRU,PXN,RPA3,RPL7,RPTOR,STX12,TBXAS1,TMCC1,TMEFF2,TMEM131,TRAP1,VAMP5,ZEB2,ZNF608	46 (34)	28
FPR1		G-protein coupled receptor	Akt,APP,AR,Cdc42,CDKN1B,CEBPA,CEBPB,Creb,EGFR,EP300,ERK1/2,EZH2,FPR1,GATA1,IKBKB,IRF3,Jnk,JUN,Mapk,MAPK1,MED1,MTOR,NFAT5,NFE2L2,NFkB (complex),PARP1,PI3K (family),PPARGC1A,PRKAA1,RB1,RELA,RICTOR,Smad2/3,SP1,STAT3,TP53	3		-1.54	0.00201	0.0139	ANXA6,AP3M2,ATP5MC1,CAD,CERS6,CHCHD3,CLEC4E,COBL,COPG2,COX7A2L,CSMD3,DBP,DLST,GABRA1,GHITM,HDGFL3,HECW2,HNRNPU,ILDR2,INTS1,ISLR2,JAZF1,JPT1,KCNQ3,KLHL29,LAMP1,MAPT,mir-128,MRC2,MYO1D,NELL2,NMI,NRSN1,PITRM1,POU2F1,PSMD8,PTGER4,PTPRE,PTPRU,PXN,RCAN3,RPA3,RPTOR,S100A13,STX12,TBXAS1,TMCC1,TMEFF2,TRAP1,ZEB2,ZNF366	51 (36)	34
DISC		complex	CEBPA,DISC,DUSP1,EGFR,estrogen receptor,IKBKB,IKK (complex),LIN28A,MAPK1,MAPK14,MAPK3,NFE2L2,NFkB (complex),NR3C1,PARP1,RARA,RELA,TP53	3		0.926	0.002	0.0046	ANXA6,AP3M2,ATP5MC1,CAD,CDC42EP3,CERS6,CLEC4E,COBL,CSMD3,DBP,DLST,FAM186A,FUS,GABRA1,GPR63,IER3,LEF1,MAPT,mir-128,MKI67,MYO1D,NELL2,NMI,NOX5,NRSN1,NTRK1,PHF11,POU2F1,PSMC3,PSMD8,PTGER4,PTPRE,PTPRU,PXN,RAD51C,RCAN3,RPL7,S100A13,SH2D2A,TBXAS1,TRAP1,WIF1	42 (18)	16
TRAF6		enzyme	Akt,AMPK,CCND1,CDKN1B,CEBPB,Creb,DUSP1,EIF4E,ERK,ERK1/2,ESR1,EZH2,GATA1,GLI1,IKBKB,IKK (complex),IRF7,JINK1/2,Jnk,LAT,LCP2,MAP3K5,Map3k7,MAPK14,MAPK8,MED1,MITF,MTOR,MYC,MYD88,NCF1,NFAT5,NFE2L2,NFkB (complex),NOS2,P38 MAPK,PARP1,PKD1,PPARGC1A,PRKAA1,PRKAA2,RB1,RELA,SIRT1,SMAD3,SP1,STAT6,STK11,TFEB,TP73,TRAF6,ZBTB16	3		0	0.00198	0.015	AHI1,AP3M2,ARL5C,CAPRIN2,CHCHD3,CLEC4E,DBP,FAM186A,GABRA1,GHITM,HDGFL3,HECW2,HYAL3,IER3,INTS1,ISLR2,JAZF1,JPT1,KCNQ3,KLHL29,KLK1,LAMP1,LRCH1,MAPT,MKI67,MRC2,MYO1D,NRSN1,PHF11,POU2F1,PTGER4,PTPRE,PXN,RAD51C,RPA3,RPTOR,RTN2,SFXN1,SH2D2A,SLC12A2,STX12,TMCC1,TMEFF2,TMEM131,UBE4A,UPP2,USP48,VPS13B,WIF1,WWOX,ZNF366,ZNF608	52 (52)	42
EPHB1		kinase	CCND1,Cdc42,CDH1,CEBPB,Creb,CTNNB1,DUSP1,EGFR,EIF4E,EPHB1,ERK,ERK1/2,GATA1,IGF1R,IKBKB,ITGB1,Jnk,JUN,Mapk,MED1,MET,MKNK1,MTOR,NCF1,NFkB (complex),NOS2,PAK2,PPARG,PRKAA1,PRKCD,PTK2,RB1,RELA,SHC1,SP1,SRC,STAT3,STAT6,SYK,TSC2	3		0.149	0.00198	0.007	AHI1,AP3M2,ATP5MC1,CAD,CHCHD3,CLEC4E,COBL,COPG2,DBP,DLST,GHITM,HECW2,HNRNPU,HYAL3,INTS1,ISLR2,JAZF1,JPT1,KCNQ3,KLHL29,KLHL31,LAMP1,LEF1,MAPT,MRC2,MYO1D,NELL2,PSMC3,PTGER4,PTPRE,RPA3,RPTOR,SFXN1,SH2D2A,SIDT1,SMAD9,STX12,TMCC1,TMEM131,UBE4A,VAMP5,WIF1,WWOX,ZNF366,ZNF608	45 (40)	35
NOX5	0.413	ion channel	Akt,APP,AR,CCND1,CDKN1B,CEBPB,Creb,DUSP1,EGFR,EIF4E,EP300,ERK,ERK1/2,EZH2,GATA1,H2AX,Hsp27,IKBKB,IRF3,Jnk,KAT5,MAPK1,MED1,MITF,MKNK1,MTOR,NFAT5,NFE2L2,NFkB (complex),NOS2,NOX5,P38 MAPK,PARP1,PPARGC1A,PRKAA1,RB1,RELA,RICTOR,RXRA,Smad2/3,SP1,STAT3,STAT6,TP53	3		-1.871	0.00196	0.0173	AHI1,ANXA6,AP3M2,ATP5MC1,CAD,CD82,CERS6,CHCHD3,CLEC4E,COBL,COPG2,COX7A2L,CSMD3,DBP,DLST,GABRA1,GHITM,HDGFL3,HECW2,IER3,ILDR2,INTS1,ISLR2,JAZF1,JPT1,KCNQ3,KLHL29,LEF1,MAPT,mir-128,MRC2,MYO1D,NMI,NRSN1,NTRK1,PITRM1,POU2F1,PSMD8,PTGER4,PTPRE,PXN,RCAN3,RPA3,RPTOR,S100A13,SFXN1,SH2D2A,STX12,TMCC1,TMEFF2,TMEM131,TRAP1,UBE4A,WWOX,ZNF366,ZNF608	56 (44)	40
TMEM184A		other	APP,AR,CCND1,CEBPB,Creb,CREB1,DUSP1,EGFR,EIF4E,EP300,ERK,FOXO1,Hsp27,IKBKB,Jnk,JUN,KAT5,MET,MITF,MKNK1,MTOR,NFAT5,NFE2L2,NFkB (complex),NOS2,P38 MAPK,PLA2G4A,PPARGC1A,RB1,RELA,RICTOR,RXRA,Smad2/3,SP1,STAT3,STAT6,TCF,TMEM184A,TP53	3		1.109	0.00195	0.0136	AHI1,ANXA6,AP3M2,ATP5MC1,CAD,CD82,CDK5RAP3,CERS6,CHCHD3,CLEC4E,COBL,COPG2,COX7A2L,CSMD3,DBP,DLST,GABRA1,GHITM,HECW2,HNRNPU,IER3,ILDR2,INTS1,ISLR2,JPT1,KCNQ3,LEF1,LEMD3,MAPT,mir-128,MRC2,MYO1D,NELL2,NOX5,NRSN1,NTRK1,PHF11,PITRM1,PSMC3,PSMD8,PTGER4,RPA3,S100A13,SFXN1,SH2D2A,STX12,TMCC1,TMEM131,TRAP1,UBE4A,WWOX,ZNF608	52 (39)	37
TGFBR		group	Creb,CREB1,EGFR,ERK1/2,ESR1,FOXO1,IKK (complex),Jnk,MAPK1,MTOR,NFE2L2,NFkB (complex),P38 MAPK,PRKCD,RB1,RELA,SMAD3,STAT3,STK11,TGFBR,TP53	3		0.762	0.00194	0.006	ANXA6,AP3M2,ATP5MC1,CAD,CD82,CDC42EP3,CDK5RAP3,CERS6,CHCHD3,CLEC4E,COPG2,CSMD3,DBP,FAM186A,GABRA1,GHITM,GPR63,INTS1,ISLR2,KLHL29,LAMP1,LEMD3,MAPT,mir-128,MRC2,NOX5,NRSN1,NTRK1,PHF11,PSMC3,PSMD8,PTGER4,PTPRE,PTPRU,PXN,RAD51C,RCAN3,RPL7,S100A13,SLC12A2,STX12,TMCC1,TRAP1	43 (21)	19
SH2D3C		other	APP,AR,EP300,FOXO1,IKBKB,Jnk,JUN,MAPK1,MTOR,NFE2L2,NFkB (complex),PTK2B,RICTOR,SH2D3C,Smad2/3,SP1,STAT3,STAT6,TCF,TP53,YAP1	3		0	0.00194	0.0078	ANXA6,ATP5MC1,CDC42EP3,CDK5RAP3,CERS6,CLEC4E,COBL,COPG2,COX7A2L,CSMD3,DBP,DLST,GABRA1,GPR63,HNRNPU,ILDR2,ISLR2,KCNQ3,LEF1,LEMD3,MAPT,mir-128,MKI67,MRC2,MYO1D,NMI,NRSN1,PHF11,PITRM1,PSMC3,PSMD8,PTPRU,PXN,RCAN3,S100A13,SLC12A2,STX12,TMCC1,TMEM131,TRAP1,ZEB2,ZNF608	42 (21)	19
ADAM17		peptidase	ADAM17,Akt,AKT1,CCND1,CDKN1B,CEBPB,Creb,DUSP1,EGFR,EIF4E,ERBB2,ERBB3,ERK,ERK1/2,ESR1,EZH2,FOXO1,GATA1,IGF1R,IKBKB,LIN28A,LYN,MAPK1,MAPK3,MED1,MTOR,MXD1,MYC,NCF1,NFAT5,NFE2L2,NOS2,NOTCH1,PAK2,PARP1,PPARG,PPARGC1A,PRKAA1,PTEN,PTK2,RARA,RELA,RICTOR,RXRA,SHC1,SP1,STAT3,STAT6,SYK	3		0.544	0.00193	0.0142	AHI1,AP3M2,ATP5MC1,CAD,CDC14B,CDC42EP3,CDK5RAP3,CLEC4E,COBL,COPG2,COX7A2L,FAM186A,FUS,GABRA1,HDGFL3,HECW2,HYAL3,IGF2R,INTS1,ISLR2,JAZF1,JPT1,KCNQ3,KLHL29,KLHL31,LAMP1,LEF1,MKI67,MYO1D,NELL2,NMI,NOX5,NRSN1,NTRK1,PHF11,POU2F1,PTGER4,PTPRE,RCAN3,RPA3,RTN2,S100A13,SFXN1,SH2D2A,SMAD9,TMCC1,TMEFF2,TMEM131,UBE4A,VAMP5,WWOX,ZEB2,ZNF366,ZNF608	54 (49)	40
IBTK		other	BTK,IBTK,IKBKB,IKK (complex),JUN,MAPK14,MTOR,NFkB (complex),NFKB2,P38 MAPK,PDCD4,PLCG2,STAT5a/b,STAT5B,SYK,TP53	3		0.343	0.0019	0.0034	ANKS1B,ANXA6,ATP5MC1,CD82,CDC42EP3,CERS6,CLEC4E,CSMD3,DBP,DIP2B,DLST,GPR63,HNRNPU,IER3,IGF2R,ISLR2,KLHL31,LEF1,MAPT,mir-128,MKI67,MYO1D,NOX5,PSMD8,PTPRU,PXN,RAD51C,RPL7,SLC12A2,STX12,TMCC1,TRAP1,WIF1,ZEB2	34 (16)	13
SYK		kinase	ABL1,Akt,AXL,CCND1,Cdc42,CDH1,CDK2,CDKN1B,CEBPB,DUSP1,ERBB2,ERK,ERK1/2,FOXO1,GATA1,IKK (complex),IKZF3,IL1B,Jnk,LCK,LCP2,LIN28A,MAPK1,MAPK14,MAPK3,MITF,MTOR,MYC,MYD88,NCF1,NFkB (complex),NOS2,NRAS,P38 MAPK,PI3K (complex),PIK3R1,PKD1,PLCG2,PPARGC1A,PRKAA1,PRKAA2,PRKCD,PTEN,PTPN11,PTPN6,RELA,RICTOR,SHC1,SIRT1,SMARCA4,SP1,STAT3,SYK,TICAM1,TLR3,TNF	3		0	0.00189	0.0154	AHI1,AP3M2,ARHGEF10L,CD82,CDC14B,CDC42EP3,CDK5RAP3,CLEC4E,COBL,COPG2,COX7A2L,DBP,FUS,GLRX3,HYAL3,ISLR2,JAZF1,JPT1,KCNQ3,KLHL29,KLHL31,LAMP1,LEMD3,LRCH1,MAPT,MELTF,MKI67,MRC2,NEAT1,NMI,NOX5,NPR3,PHF11,PLPP1,PTGER4,PTPRE,PXN,RAD51C,RCAN3,RPA3,RPTOR,RTN2,SEMA5A,SFXN1,SH2D2A,SLC12A2,STX12,TMCC1,TMEFF2,TRIM11,VPS13B,WIF1,WWOX,ZNF366	54 (56)	44
KDM4A		transcription regulator	IRF3,KDM4A,MTOR,NFkB (complex),RELA,STAT3,STING1,TBK1,TP53	3		-0.354	0.00188	0.0027	ANXA6,AP3M2,ATP5MC1,CD82,CDC42EP3,CERS6,CLEC4E,COBL,COPG2,CSMD3,DLST,GPR63,ISLR2,JPT1,LEF1,MAPT,mir-128,MKI67,NMI,PHF11,PSMD8,PTGER4,PTPRE,PTPRU,PXN,RPL7,RPTOR,SLC12A2,STX12,TMCC1,TRAP1,ZEB2	32 (9)	8
RHBDD3		other	APP,AR,CCND1,CEBPB,Creb,CREB1,DUSP1,EGFR,EIF4E,EP300,ERK,FOXO1,Hsp27,IKBKB,Jnk,JUN,KAT5,MET,MITF,MKNK1,MTOR,NFAT5,NFE2L2,NFkB (complex),NOS2,P38 MAPK,PLA2G4A,PPARGC1A,RB1,RELA,RHBDD3,RICTOR,RXRA,Smad2/3,SP1,STAT3,STAT6,TCF,TP53	3		1.109	0.00187	0.0132	AHI1,ANXA6,AP3M2,ATP5MC1,CAD,CD82,CDK5RAP3,CERS6,CHCHD3,CLEC4E,COBL,COPG2,COX7A2L,CSMD3,DBP,DLST,GABRA1,GHITM,HECW2,HNRNPU,IER3,ILDR2,INTS1,ISLR2,JPT1,KCNQ3,LEF1,LEMD3,MAPT,mir-128,MRC2,MYO1D,NELL2,NOX5,NRSN1,NTRK1,PHF11,PITRM1,PSMC3,PSMD8,PTGER4,RPA3,S100A13,SFXN1,SH2D2A,STX12,TMCC1,TMEM131,TRAP1,UBE4A,WWOX,ZNF608	52 (39)	37
DBH-AS1		other	APP,AR,CCND1,CEBPB,Creb,CREB1,DBH-AS1,DUSP1,EGFR,EIF4E,EP300,ERK,FOXO1,Hsp27,IKBKB,Jnk,JUN,KAT5,MET,MITF,MKNK1,MTOR,NFAT5,NFE2L2,NFkB (complex),NOS2,P38 MAPK,PLA2G4A,PPARGC1A,RB1,RELA,RICTOR,RXRA,Smad2/3,SP1,STAT3,STAT6,TCF,TP53	3		-1.109	0.00187	0.013	AHI1,ANXA6,AP3M2,ATP5MC1,CAD,CD82,CDK5RAP3,CERS6,CHCHD3,CLEC4E,COBL,COPG2,COX7A2L,CSMD3,DBP,DLST,GABRA1,GHITM,HECW2,HNRNPU,IER3,ILDR2,INTS1,ISLR2,JPT1,KCNQ3,LEF1,LEMD3,MAPT,mir-128,MRC2,MYO1D,NELL2,NOX5,NRSN1,NTRK1,PHF11,PITRM1,PSMC3,PSMD8,PTGER4,RPA3,S100A13,SFXN1,SH2D2A,STX12,TMCC1,TMEM131,TRAP1,UBE4A,WWOX,ZNF608	52 (39)	37
MAG		other	CEBPB,IRF3,Jnk,MAG,MAPK1,NFkB (complex),NTRK2,PARP1,RELA,RHOA,SIRT1,STAT3,TP53	3		0.845	0.00187	0.0036	ANXA6,AP3M2,ATP5MC1,CD82,CDC42EP3,CERS6,CLEC4E,COBL,COPG2,CSMD3,DBP,DLST,GPR63,JPT1,LEF1,LEMD3,LRCH1,MAPT,mir-128,MRC2,NELL2,NMI,NOX5,POU2F1,PSMD8,PTGER4,PTPRU,PXN,RCAN3,RPA3,RPL7,RPTOR,SLC12A2,TRAP1,ZEB2	35 (13)	10
RNF7		enzyme	CEBPB,Creb,CTNNB1,ERK1/2,estrogen receptor,GATA1,IKBKB,IKK (complex),Jnk,JUN,MED1,MTOR,NFkB (complex),PRKAA1,RELA,RNF7,SP1,STAT3,STAT5a/b,TP53	3		-0.926	0.00186	0.0043	ANXA6,AP3M2,ATP5MC1,CD82,CERS6,CLEC4E,COBL,COPG2,CSMD3,DBP,DLST,GPR63,HECW2,HNRNPU,IER3,IGF2R,INTS1,ISLR2,JAZF1,JPT1,KCNQ3,KLHL29,LEF1,LEMD3,MAPT,mir-128,MRC2,MYO1D,NOX5,PSMD8,PTGER4,PTPRE,PTPRU,PXN,RAD51C,RPA3,RPL7,STX12,TMCC1,TRAP1,WIF1,ZNF366	42 (20)	19
TLR10		transmembrane receptor	APP,AR,CCND1,CEBPB,Creb,CREB1,DUSP1,EGFR,EIF4E,EP300,ERK,FOXO1,Hsp27,IKBKB,Jnk,JUN,KAT5,MET,MITF,MKNK1,MTOR,NFAT5,NFE2L2,NFkB (complex),NOS2,P38 MAPK,PLA2G4A,PPARGC1A,RB1,RELA,RICTOR,RXRA,Smad2/3,SP1,STAT3,STAT6,TCF,TLR10,TP53	3		1.109	0.00186	0.013	AHI1,ANXA6,AP3M2,ATP5MC1,CAD,CD82,CDK5RAP3,CERS6,CHCHD3,CLEC4E,COBL,COPG2,COX7A2L,CSMD3,DBP,DLST,GABRA1,GHITM,HECW2,HNRNPU,IER3,ILDR2,INTS1,ISLR2,JPT1,KCNQ3,LEF1,LEMD3,MAPT,mir-128,MRC2,MYO1D,NELL2,NOX5,NRSN1,NTRK1,PHF11,PITRM1,PSMC3,PSMD8,PTGER4,RPA3,S100A13,SFXN1,SH2D2A,STX12,TMCC1,TMEM131,TRAP1,UBE4A,WWOX,ZNF608	52 (39)	37
MAP3K20		kinase	APP,AR,CCND1,CEBPB,Creb,CREB1,DUSP1,EGFR,EIF4E,EP300,ERK,FOXO1,Hsp27,IKBKB,Jnk,JUN,KAT5,MAP3K20,MET,MITF,MKNK1,MTOR,NFAT5,NFE2L2,NFkB (complex),NOS2,P38 MAPK,PLA2G4A,PPARGC1A,RB1,RELA,RICTOR,RXRA,Smad2/3,SP1,STAT3,STAT6,TCF,TP53	3		-1.109	0.00186	0.013	AHI1,ANXA6,AP3M2,ATP5MC1,CAD,CD82,CDK5RAP3,CERS6,CHCHD3,CLEC4E,COBL,COPG2,COX7A2L,CSMD3,DBP,DLST,GABRA1,GHITM,HECW2,HNRNPU,IER3,ILDR2,INTS1,ISLR2,JPT1,KCNQ3,LEF1,LEMD3,MAPT,mir-128,MRC2,MYO1D,NELL2,NOX5,NRSN1,NTRK1,PHF11,PITRM1,PSMC3,PSMD8,PTGER4,RPA3,S100A13,SFXN1,SH2D2A,STX12,TMCC1,TMEM131,TRAP1,UBE4A,WWOX,ZNF608	52 (39)	37
HCG11		other	APP,AR,CCND1,CEBPB,Creb,CREB1,DUSP1,EGFR,EIF4E,EP300,ERK,FOXO1,HCG11,Hsp27,IKBKB,Jnk,JUN,KAT5,MET,MITF,MKNK1,MTOR,NFAT5,NFE2L2,NFkB (complex),NOS2,P38 MAPK,PLA2G4A,PPARGC1A,RB1,RELA,RICTOR,RXRA,Smad2/3,SP1,STAT3,STAT6,TCF,TP53	3		-1.109	0.00186	0.013	AHI1,ANXA6,AP3M2,ATP5MC1,CAD,CD82,CDK5RAP3,CERS6,CHCHD3,CLEC4E,COBL,COPG2,COX7A2L,CSMD3,DBP,DLST,GABRA1,GHITM,HECW2,HNRNPU,IER3,ILDR2,INTS1,ISLR2,JPT1,KCNQ3,LEF1,LEMD3,MAPT,mir-128,MRC2,MYO1D,NELL2,NOX5,NRSN1,NTRK1,PHF11,PITRM1,PSMC3,PSMD8,PTGER4,RPA3,S100A13,SFXN1,SH2D2A,STX12,TMCC1,TMEM131,TRAP1,UBE4A,WWOX,ZNF608	52 (39)	37
NCR1		transmembrane receptor	DUSP1,EGFR,ERN1,FOXO1,FYN,IKBKB,IKZF3,INSR,ITGB1,Jnk,JUN,LCK,LCP2,LIN28A,MAPK1,MAPK8,MTOR,NCR1,NFkB (complex),NOS2,NRAS,PARP1,PLCG2,RARA,RELA,SIRT1,STAT3,SYK,TP53,VAV1	3		-0.146	0.00184	0.0091	ANXA6,AP3M2,ATP5MC1,CAD,CDK5RAP3,CERS6,CLEC4E,COBL,COPG2,CSMD3,DLST,FAM186A,FUS,GPR63,HNRNPU,IGF2R,ISLR2,KLHL31,LAMP1,LEMD3,LRCH1,MAPT,mir-128,MKI67,MRC2,MYO1D,NELL2,NMI,NOX5,NPR3,NTRK1,PHF11,POU2F1,PSMD8,PTPRE,PTPRU,RCAN3,RPL7,SEMA5A,SFXN1,SH2D2A,SIDT1,SLC12A2,STX12,TMCC1,TRAP1,TRIM11	47 (30)	26
TFF2		other	APP,AR,CEBPA,CEBPB,Creb,CTNNB1,ERK1/2,FOXO1,GATA1,IKBKB,Jnk,JUN,MED1,MTOR,NFE2L2,NFkB (complex),PLA2G4A,PRKAA1,RELA,RICTOR,Smad2/3,SP1,STAT3,STAT6,TCF,TFF2,TP53	3		-0.714	0.00181	0.0074	ANXA6,AP3M2,ATP5MC1,CDK5RAP3,CERS6,CLEC4E,COBL,COPG2,COX7A2L,CSMD3,DBP,DLST,GABRA1,GPR63,HECW2,HNRNPU,ILDR2,INTS1,ISLR2,JAZF1,JPT1,KCNQ3,KLHL29,LEF1,LEMD3,MAPT,mir-128,MRC2,MYO1D,NOX5,NRSN1,PHF11,PITRM1,PSMC3,PSMD8,PTGER4,PTPRE,PTPRU,PXN,RPA3,S100A13,STX12,TBXAS1,TMCC1,TMEM131,TRAP1,WIF1,ZNF366,ZNF608	49 (27)	26
GH1		growth factor	Akt,CCND1,CDKN1B,CEBPB,Creb,DUSP1,EGFR,EIF4E,ERBB2,ERK,ERK1/2,EZH2,FOXO1,GATA1,GH1,GHR,IKBKB,IRF3,JAK2,JUN,KRAS,LIN28A,MAPK1,MAPK3,MED1,MTOR,MXD1,NFAT5,NFE2L2,NOS2,NRAS,PARP1,PI3K (complex),PPARG,PPARGC1A,PRKAA1,PRLR,RB1,SP1,STAT5a/b,STAT5B,TSC2	3		-0.429	0.00181	0.0149	AHI1,ANKS1B,CAD,CAMK1,CDC14B,CDC42EP3,CDK5RAP3,CHCHD3,CLEC4E,COX7A2L,DIP2B,FUS,GABRA1,GHITM,HDGFL3,HECW2,HNRNPU,INTS1,ISLR2,JAZF1,JPT1,KCNQ3,KLHL29,LAMP1,MKI67,MYO1D,NELL2,NMI,NOX5,NPR3,NRSN1,PHF11,POU2F1,PSMC3,PTPRE,RCAN3,RPA3,RPTOR,S100A13,SFXN1,SH2D2A,STX12,TMCC1,TMEFF2,TRIM11,UBE4A,VAMP5,WWOX,ZNF366	49 (42)	34
GPER1		G-protein coupled receptor	AHR,CEBPA,CEBPB,Creb,CTNNB1,DUSP1,ERK1/2,ESR1,ESR2,FASN,GATA1,GPER1,GSK3B,IGF1R,Jnk,JUN,LIN28A,MAPK1,MAPK14,MAPK3,MED1,MTOR,NFE2L2,PARP1,PPARG,PRKAA1,PRKCD,RELA,SP1,STAT3	3		-0.447	0.0018	0.0072	AP3M2,ATP5MC1,CD82,CERS6,COBL,COPG2,FAM186A,FUS,GABRA1,HECW2,HNRNPU,IER3,INTS1,ISLR2,JAZF1,JPT1,KCNQ3,KLHL29,LAMP1,LEF1,LEMD3,LRP1B,MAPT,MKI67,MRC2,NELL2,NMI,NOX5,NRSN1,NTRK1,PHF11,POU2F1,PSMC3,PTGER4,PTPRE,RCAN3,RPA3,S100A13,SH2D2A,STX12,TBXAS1,TMCC1,TOMM70,VAMP5,ZNF366	45 (30)	28
TRAF3IP2		enzyme	Akt,CDKN1B,CEBPA,Creb,EZH2,FOXO1,FOXO3,GATA1,GLI1,IKBKB,IKK (complex),IRF3,Jnk,JUN,MAPK7,MEF2C,MEF2D,MPO,NFAT5,NFE2,NFE2L2,NFkB (complex),PPARG,PPARGC1A,PRKAA2,RB1,RELA,RICTOR,STAT6,TP73,TRAF3IP2,TSC2	3		0.781	0.00179	0.0057	AP3M2,ARL5C,BLK,CAPRIN2,CDK5RAP3,CHCHD3,CLEC4E,COX7A2L,DBP,GABRA1,GHITM,HDGFL3,HECW2,HNRNPU,IER3,IGF2R,INTS1,JAZF1,KLHL29,KLK1,LEF1,LEMD3,MRC2,MYO1D,NRSN1,NTRK1,PHF11,PSMC3,PTGER4,PXN,RAD51C,RPA3,RPTOR,S100A13,TBXAS1,TMEFF2,TMEM131,USP48,VAMP5,ZNF366,ZNF608	41 (32)	28
PTPN12		phosphatase	ABL1,AR,Cdc42,CEBPA,Creb,EGFR,EGR1,EP300,estrogen receptor,FOXO1,GLI1,IKBKB,IKK (complex),JAK2,MTOR,NFAT5,NFkB (complex),NFKBIA,PARP1,PRKCD,PTK2B,PTPN12,RAC1,RELA,SP1,STAT3,STAT5B,STAT6,TP73,VAV2	3		-1.265	0.00179	0.0057	ANKS1B,AP3M2,ARL5C,CAD,CAPRIN2,CDK5RAP3,CLEC4E,COBL,COPG2,DBP,DIP2B,HECW2,IER3,ILDR2,INTS1,ISLR2,KCNQ3,KLK1,LAMP1,LEF1,LEMD3,MAPT,MYO1D,NELL2,NOX5,NTRK1,PITRM1,POU2F1,PTGER4,PTPRE,PXN,RAD51C,SLC12A2,STX12,TBXAS1,TMCC1,TMEM131,USP48,ZEB2,ZNF608	40 (30)	24
Fgfr		group	Akt,CCND1,CDKN1B,CEBPB,Creb,DUSP1,EIF2AK2,EIF4E,EP300,ERK,ERK1/2,EXOC7,EZH2,Fgfr,FOXO1,GATA1,IRF3,Jnk,JUN,MAPK1,MED1,MTOR,NFAT5,NFkB (complex),NOS2,Nr1h,NR3C1,PPARGC1A,PRKAA1,PRKAA2,RB1,RELA,RPS6KA3,RXRA,SP1,STAT3,TP53,TP73,TSC2,ZDHHC3	3		-0.555	0.00178	0.0095	AHI1,ANXA6,AP3M2,ARL5C,ATP5MC1,CDC42EP3,CDK5RAP3,CERS6,CHCHD3,CLEC4E,COBL,COPG2,CSMD3,DLST,GHITM,HDGFL3,HECW2,HLA-DOB,HNRNPU,IER3,IGF2R,INTS1,ISLR2,JAZF1,JPT1,KCNQ3,KLHL29,MAPT,mir-128,MRC2,NMI,NTRK1,PHF11,PSMC3,PSMD8,PTGER4,PTPRE,PXN,RCAN3,RPA3,RPL7,RPTOR,SFXN1,SH2D2A,STX12,TMCC1,TMEFF2,TRAP1,UBE4A,WWOX,ZEB2,ZNF366	52 (40)	35
WWP2		enzyme	Akt,AR,Cdc42,CDKN1B,CEBPA,EGFR,EGR2,EIF4E,EZH2,FOXO1,FOXO3,IFNB1,IGF1R,IKBKB,IL1B,IL6,Jnk,MAPK1,MTOR,NFAT5,NFkB (complex),PPARGC1A,PTEN,RB1,SP1,STAT3,STAT6,TICAM1,TNF,TP53,WWP2	3		-1	0.00176	0.0114	ANXA6,ARHGEF10L,ATP5MC1,CAD,CDC42EP3,CDK5RAP3,CHCHD3,CLEC4E,COBL,COPG2,CSMD3,DBP,GABRA1,GHITM,GPR63,HDGFL3,HECW2,IER3,ILDR2,ISLR2,KCNQ3,LAMP1,LEMD3,MAP2K4,mir-128,MKI67,MRC2,MYO1D,NEAT1,NTRK1,PITRM1,PLPP1,POU2F1,PSMD8,PTPRU,RAD51C,RCAN3,RPA3,RPL7,SIDT1,STX12,TBXAS1,TMCC1,TMEFF2,TMEM131,TRAP1,UBE4A,ZEB2,ZNF608	49 (31)	29
ADRA1		group	ADRA1,Akt,CCND1,CDKN1B,CEBPB,Creb,DUSP1,EGFR,EIF4E,ERK,ERK1/2,EZH2,FOXO1,GATA1,Hsp27,IKBKB,INSR,IRF3,Jnk,JUN,Mapk,MAPK1,MAPK8,MED1,MKNK1,MTOR,NCF1,NFAT5,NFATC2,NFkB (complex),NOS2,NR4A1,PLC,PPARG,PPARGC1A,PRKAA1,PRKCD,RB1,RELA,Rsk,RXRA,SHC1,SIRT1,SP1,STAT3,TP53,TSC2	3		-0.816	0.00176	0.0136	AHI1,ANXA6,AP3M2,ATP5MC1,CAD,CDK5RAP3,CERS6,CHCHD3,CLEC4E,COBL,COPG2,CSMD3,DBP,DLST,GHITM,HDGFL3,HECW2,HNRNPU,HYAL3,IGF2R,INTS1,ISLR2,JAZF1,JPT1,KCNQ3,KLHL29,LAMP1,LRCH1,mir-128,MRC2,MYO1D,NELL2,NMI,NTRK1,PHF11,PSMC3,PSMD8,PTGER4,PTPRE,PTPRU,RCAN3,RPA3,RPL7,RPTOR,SFXN1,SH2D2A,STX12,TMCC1,TMEFF2,TRAP1,UBE4A,VAMP5,WWOX,ZNF366	54 (47)	40
FGR		kinase	ABL1,Akt,AKT1,AR,CDKN1B,CEBPA,CEBPB,Creb,DUSP1,EGFR,ERBB2,ERK1/2,EZH2,FCER1G,FGR,GATA1,IKBKB,IKK (complex),IKZF3,INSR,Jnk,KRAS,LIN28A,MAP2K7,MAPK1,MAPK14,MAPK3,MAPK8,MED1,NFAT5,NOS2,NRAS,PARP1,PI3K (complex),PPARGC1A,PRKAA1,RARA,RB1,RELA,RICTOR,RIPK2,SIRT1,Smad2/3,SP1,STAT6,SYK,TP53	3		-1.987	0.00173	0.0194	ANXA6,AP3M2,ARL5C,ATP5MC1,CAD,CAMK1,CDC14B,CERS6,CHCHD3,CLEC4E,COX7A2L,CSMD3,DLST,FAM186A,FUS,GHITM,HDGFL3,HECW2,IER3,ILDR2,INTS1,JAZF1,JPT1,KCNQ3,KLHL29,KLHL31,LEF1,LRCH1,MAP2K4,MAPT,mir-128,MKI67,MRC2,MYO1D,NELL2,NMI,NOX5,NPR3,PHF11,PITRM1,POU2F1,PSMD8,PTGER4,RAD51C,RCAN3,RPA3,SEMA5A,SFXN1,SH2D2A,TBXAS1,TMEFF2,TMEM131,TRAP1,TRIM11,WIF1,ZNF366,ZNF608	57 (47)	39
Mapk		group	Akt,CASP8,CCND1,Cdc42,CDKN1B,CEBPB,Creb,CREB1,DUSP1,E2F3,EGFR,EIF4E,ERK,EZH2,FOXO1,IRF3,JUN,Mapk,MKNK1,MTOR,NFAT5,NOS2,PARP1,PPARG,PPARGC1A,PTEN,RB1,RELA,RXRA,SP1,SPRY2,STAT3,STAT5a/b,STAT6,THRA,TSC2	3		-0.302	0.00172	0.007	AHI1,AP3M2,CAD,CDK5RAP3,CHCHD3,COBL,COPG2,DBP,DLST,GHITM,GPR63,HDGFL3,HECW2,HNRNPU,INTS1,ISLR2,JPT1,KCNQ3,LAMP1,MAPT,MKI67,NEAT1,NELL2,NOX5,NTRK1,POU2F1,PSMC3,PTGER4,PTPRE,RAD51C,RPA3,RPTOR,SFXN1,SH2D2A,STX12,TBXAS1,TMCC1,TMEFF2,TMEM131,UBE4A,VAMP5,WWOX,ZEB2,ZNF608	44 (36)	32
MHC II		group	CCND1,CEBPB,Creb,DUSP1,EIF4E,ERK,ERK1/2,GSK3B,MHC II,MTOR,NFkB (complex),NOS2,Notch,PLA2G4A,PPARG,RELA,RXRA,STAT3	3		0.898	0.00172	0.0015	AHI1,AP3M2,CD82,CDC42EP3,CLEC4E,COBL,COPG2,DBP,INTS1,ISLR2,JPT1,LEF1,LEMD3,MAPT,MKI67,NOX5,NTRK1,PTGER4,PTPRE,PXN,RPA3,RPL7,SFXN1,SH2D2A,STX12,TBXAS1,TMCC1,UBE4A,VAMP5,WWOX,ZEB2	31 (18)	17
KLF6		transcription regulator	Akt,CDKN1B,CEBPA,EP300,estrogen receptor,EZH2,FOXO1,FOXO3,Hsp27,IKBKB,IKK (complex),IRF3,Jnk,JUN,KLF6,KRAS,MAPK1,MTOR,NFAT5,NFkB (complex),NOS2,NRAS,PI3K (complex),PPARGC1A,RB1,RELA,SP1,STAT3,TP53,TSC2	3		-1.021	0.00172	0.0054	ANXA6,AP3M2,ATP5MC1,CAMK1,CDK5RAP3,CERS6,CHCHD3,CLEC4E,COBL,COPG2,CSMD3,DBP,DLST,GHITM,HDGFL3,HECW2,HNRNPU,IER3,IGF2R,ISLR2,KCNQ3,LEMD3,MAPT,mir-128,MKI67,MRC2,MYO1D,NMI,NPR3,NTRK1,PSMC3,PSMD8,PTGER4,PTPRU,PXN,RAD51C,RCAN3,RPA3,RPL7,RPTOR,SFXN1,STX12,TBXAS1,TMCC1,TMEFF2,TRAP1,TRIM11	47 (30)	28
ICOSLG/LOC102723996		other	APP,AR,CCND1,CEBPB,Creb,CREB1,DUSP1,EGFR,EIF4E,EP300,ERK,estrogen receptor,FOXO1,Hsp27,ICOSLG/LOC102723996,IKBKB,IKK (complex),Jnk,JUN,KAT5,MET,MITF,MKNK1,MTOR,NFAT5,NFE2L2,NFkB (complex),NOS2,P38 MAPK,PLA2G4A,PPARGC1A,RB1,RELA,RICTOR,RXRA,Smad2/3,SP1,STAT3,STAT6,TCF,TP53	3		-0.816	0.00172	0.0102	AHI1,ANXA6,AP3M2,ATP5MC1,CAD,CD82,CDK5RAP3,CERS6,CHCHD3,CLEC4E,COBL,COPG2,COX7A2L,CSMD3,DBP,DLST,GABRA1,GHITM,HECW2,HNRNPU,IER3,ILDR2,INTS1,ISLR2,JPT1,KCNQ3,LEF1,LEMD3,MAPT,mir-128,MRC2,MYO1D,NELL2,NOX5,NRSN1,NTRK1,PHF11,PITRM1,PSMC3,PSMD8,PTGER4,PXN,RAD51C,RPA3,S100A13,SFXN1,SH2D2A,STX12,TMCC1,TMEM131,TRAP1,UBE4A,WWOX,ZNF608	54 (41)	39
TSC22D3		transcription regulator	Akt,CCND1,CDKN1B,CEBPB,CXCR4,DUSP1,EGFR,EIF4E,ELAVL1,ERK,ERK1/2,EZH2,FOXO1,GATA1,Hsp27,IKBKB,IKK (complex),Jnk,LIN28A,MAP2K1/2,MAPK1,MAPK3,MED1,Mek,MITF,MKNK1,MTOR,NCL,NFAT5,NFkB (complex),NOS2,P38 MAPK,PARP1,PPARGC1A,PRKAA1,RAF1,RARA,RELA,RICTOR,RXRA,SGK1,SIRT1,Smad2/3,SP1,STAT3,STAT6,TCF7L2,TLR3,TP53,TSC22D3	3		1.313	0.00166	0.0142	AHI1,ANKS1B,ANXA6,AP3M2,ATP5MC1,CAD,CD82,CDC42EP3,CDK5RAP3,CLEC4E,COBL,COPG2,COX7A2L,CSMD3,DBP,FAM186A,FUS,GLRX3,HDGFL3,HECW2,IER3,ISLR2,JAZF1,JPT1,KCNQ3,KLHL29,LAMP1,LEMD3,LRCH1,mir-128,MKI67,MRC2,MYO1D,NELL2,NMI,NOX5,NTRK1,PHF11,POU2F1,PSMD8,PTGER4,PTPRE,PTPRN2,PXN,RAD51C,RCAN3,RPA3,SFXN1,SH2D2A,STX12,TMCC1,TMEFF2,TMEM131,TRAP1,UBE4A,WWOX,ZNF366,ZNF608	58 (50)	42
ACKR3		G-protein coupled receptor	ACKR3,CCND1,Cdc42,CEBPB,Creb,CREB1,CTNNB1,DUSP1,EGFR,EIF4E,ERK,ERK1/2,FOXO1,GATA1,Jnk,JUN,LCP2,Mapk,MAPK1,MAPK14,MED1,MTOR,NFkB (complex),NOS2,PARP1,PI3K (family),PLA2G4A,PPARG,PRKAA1,RELA,RXRA,SP1,STAT3,STAT6,ZAP70	3		0.302	0.00164	0.0037	AHI1,AP3M2,CAD,CDK5RAP3,CLEC4E,COBL,COPG2,DBP,HECW2,HNRNPU,IGF2R,INTS1,ISLR2,JAZF1,JPT1,KCNQ3,KLHL29,LAMP1,MAPT,MKI67,MRC2,NELL2,NMI,NOX5,NTRK1,PHF11,POU2F1,PTGER4,PTPRE,PXN,RCAN3,RPA3,SFXN1,SH2D2A,STX12,TMCC1,TMEM131,UBE4A,VAMP5,WIF1,WWOX,ZEB2,ZNF366,ZNF608	44 (35)	32
TAB3		other	APP,AR,CCND1,CEBPB,Creb,CREB1,DUSP1,EGFR,EIF4E,EP300,ERK,estrogen receptor,FOXO1,Hsp27,IKBKB,IKK (complex),Jnk,JUN,KAT5,MET,MITF,MKNK1,MTOR,NFAT5,NFE2L2,NFkB (complex),NOS2,P38 MAPK,PLA2G4A,PPARGC1A,RB1,RELA,RICTOR,RXRA,Smad2/3,SP1,STAT3,STAT6,TAB3,TCF,TP53	3		-0.816	0.00163	0.01	AHI1,ANXA6,AP3M2,ATP5MC1,CAD,CD82,CDK5RAP3,CERS6,CHCHD3,CLEC4E,COBL,COPG2,COX7A2L,CSMD3,DBP,DLST,GABRA1,GHITM,HECW2,HNRNPU,IER3,ILDR2,INTS1,ISLR2,JPT1,KCNQ3,LEF1,LEMD3,MAPT,mir-128,MRC2,MYO1D,NELL2,NOX5,NRSN1,NTRK1,PHF11,PITRM1,PSMC3,PSMD8,PTGER4,PXN,RAD51C,RPA3,S100A13,SFXN1,SH2D2A,STX12,TMCC1,TMEM131,TRAP1,UBE4A,WWOX,ZNF608	54 (41)	39
miR-199a-3p (and other miRNAs w/seed CAGUAGU)		mature microRNA	CCND1,CEBPB,CTNNB1,CXCR4,DUSP1,EIF4E,ELAVL1,ERK,ERK1/2,IRF3,Jnk,Mapk,Mek,miR-199a-3p (and other miRNAs w/seed CAGUAGU),MTOR,NCL,NFkB (complex),PAK4,PLA2G4A,PPARG,RB1,RELA,RXRA,STAT3,TCF7L2,TP53	3		-0.302	0.00161	0.004	AHI1,ANKS1B,ANXA6,AP3M2,ATP5MC1,CDC42EP3,CERS6,CHCHD3,CLEC4E,COBL,COPG2,CSMD3,DBP,DLST,GHITM,ISLR2,JPT1,LAMP1,LEF1,LEMD3,MAPT,mir-128,MRC2,NOX5,NTRK1,PHF11,PSMD8,PTGER4,PTPRE,PTPRN2,PTPRU,PXN,RPA3,RPL7,RPTOR,SH2D2A,STX12,TBXAS1,TMCC1,TRAP1,UBE4A,VAMP5,WIF1,WWOX	44 (26)	22
CD3E		transmembrane receptor	Akt,AR,CBL,CCND1,CD3E,CDKN1B,CEBPB,CXCR4,DUSP1,ELAVL1,ERK,ERK1/2,EZH2,FYN,GATA1,IKBKB,IKK (complex),ITGB1,ITK,Jnk,LCK,LIN28A,MAP2K1,MAP2K4,MAP2K7,MAPK1,MAPK14,MAPK3,Mek,MTOR,MYC,NCF1,NFkB (complex),NRAS,PAK2,PARP1,PIK3CG,PLG,PPARG,PPARGC1A,PRKAA1,PTPN6,RAF1,RARA,RICTOR,RXRA,Smad2/3,SP1,STK11,TP53	3		-0.135	0.0016	0.0153	AHI1,ANKS1B,ANXA6,CERS6,CLEC4E,COX7A2L,CSMD3,DBP,FAM186A,FUS,HDGFL3,HYAL3,IER3,ILDR2,ISLR2,JAZF1,JPT1,KCNQ3,KLHL29,LEF1,MAP2K4,MAPT,mir-128,MKI67,MRC2,MYO1D,NELL2,NMI,NOX5,NPR3,NTRK1,PHF11,PITRM1,POU2F1,PSMD8,PTPRE,PTPRN2,PTPRU,PXN,RAD51C,RCAN3,RPA3,RTN2,SH2D2A,SIDT1,SMAD9,STX12,TMCC1,TMEFF2,TRAP1,TRIM11,VAMP5,WIF1,WWOX,ZNF366	55 (50)	37
CD19		transmembrane receptor	Akt,AKT1,AR,BTK,CCND1,CD19,CDKN1B,CEBPB,Creb,DUSP1,EIF4E,ELAVL1,ERBB2,ERK,ERK1/2,EZH2,FYN,GATA1,HSF1,Hsp27,IKBKB,IKK (complex),ITGB1,Jnk,KRAS,LIN28A,LYN,MAP2K1,MAPK1,MAPK8,MAPK9,MED1,MTOR,MYC,NCL,NFAT5,NFE2L2,NRAS,PARP1,PI3K (complex),PI3K (family),PPARG,PPARGC1A,PRKAA1,RARA,RB1,RELA,RICTOR,RXRA,SIRT1,SP1,SREBF1,STAT3,STAT5B,STAT6,STK11,SYK,VAV	3		-1.722	0.00158	0.0165	AHI1,ANKS1B,AP3M2,CAMK1,CDC14B,CHCHD3,COBL,COPG2,COX7A2L,DIP2B,FAM186A,FUS,GABRA1,GHITM,HDGFL3,HECW2,ILDR2,INTS1,ISLR2,JAZF1,JPT1,KCNQ3,KLHL29,KLHL31,LRCH1,MAPT,MKI67,MRC2,MYO1D,NELL2,NOX5,NPR3,NRSN1,NTRK1,PHF11,PITRM1,POU2F1,PTGER4,PTPRE,PTPRN2,PXN,RAD51C,RCAN3,RPA3,RTN2,S100A13,SH2D2A,SIDT1,TMCC1,TMEFF2,TMEM131,TRIM11,UBE4A,VAMP5,WWOX,ZNF366,ZNF608	57 (58)	48
CDKN1B		kinase	CASP2,CCNA2,CCND1,CDK2,CDKN1B,CTNNB1,Cyclin E,E2F3,EIF4E,FOXO1,GATA1,HSF1,JINK1/2,Jnk,JUN,LMNA,MAPK1,MTOR,MYC,NFE2,NPM1,Nr1h,NR3C1,PARP1,PPARG,RB1,RELA,SMARCA4,SREBF1,STAT1,STAT3,TP73	3		-1.206	0.00157	0.0074	AHI1,AP3M2,ARL5C,CAD,CDC42EP3,CDK5RAP3,CHCHD3,COBL,COPG2,DLST,GHITM,GPR63,HLA-DOB,HNRNPU,IER3,IGF2R,ISLR2,JAZF1,JPT1,KCNQ3,LEF1,MAPT,MELTF,MRC2,NEAT1,NELL2,NTRK1,PHF11,POU2F1,PTGER4,RCAN3,RTN2,S100A13,SLC12A2,STX12,TBXAS1,TMCC1,TMEFF2,UBE4A,VAMP5,WIF1,WWOX,ZEB2,ZNF366	44 (32)	24
BMP7		growth factor	APP,AR,BMP7,CEBPA,CEBPB,Creb,CREB1,CTNNB1,EGFR,EIF4E,EP300,ERK1/2,FOXO1,GATA1,Hsp27,IKBKB,Jnk,JUN,KAT5,MED1,MET,MITF,MKNK1,MTOR,NFAT5,NFE2L2,NFkB (complex),P38 MAPK,PLA2G4A,PPARG,PPARGC1A,PRKAA1,RB1,RELA,RICTOR,Smad2/3,SP1,STAT3,STAT6,TCF,TP53	3		1.483	0.00156	0.011	ANXA6,AP3M2,ATP5MC1,CAD,CD82,CDK5RAP3,CERS6,CHCHD3,CLEC4E,COBL,COPG2,COX7A2L,CSMD3,DBP,DLST,GABRA1,GHITM,HECW2,HNRNPU,IER3,ILDR2,INTS1,ISLR2,JAZF1,JPT1,KCNQ3,KLHL29,LEF1,LEMD3,MAPT,mir-128,MRC2,MYO1D,NELL2,NOX5,NRSN1,NTRK1,PHF11,PITRM1,PSMC3,PSMD8,PTGER4,PTPRE,RPA3,S100A13,STX12,TBXAS1,TMCC1,TMEM131,TRAP1,UBE4A,VAMP5,WIF1,ZNF366,ZNF608	55 (41)	40
PRKACA		kinase	26s Proteasome,ADRB2,AR,Cdc42,CEBPA,CEBPB,Creb,CXCR4,EIF4E,ELAVL1,ERK1/2,ESR1,FOXO1,GATA1,HMGA1,HSF1,IKBKB,IRF3,ITGB2,JUN,Mapk,MED1,Mek,MKNK1,MTOR,NCL,Pka,PPARG,PRKAA1,PRKACA,RB1,RELA,RHO,SIRT1,SP1,STAT3,STAT6,TCF7L2,TGM2,TNF	3		-1.697	0.00156	0.0122	ANKS1B,AP3M2,ARHGEF10L,CAD,CDC42EP3,CDK5RAP3,CHCHD3,COBL,COPG2,DBP,DLST,FAM186A,GABRA1,GHITM,GPR63,HECW2,HNRNPU,IER3,ILDR2,INTS1,ISLR2,JAZF1,KCNQ3,KLHL29,LAMP1,LEMD3,LRCH1,MAP2K4,MAPT,MYO1D,NELL2,PDC,PITRM1,PLPP1,POU2F1,PTGER4,PTPRE,PTPRN2,RPA3,RPTOR,SFXN1,STX12,TBXAS1,TMCC1,TMEM131,UBE4A,VAMP5,ZEB2,ZNF366,ZNF608	50 (40)	35
IL36B		cytokine	APP,AR,CEBPA,CEBPB,Creb,CTNNB1,ERK1/2,estrogen receptor,FOXO1,GATA1,IKBKB,IKK (complex),IL36B,Jnk,JUN,MED1,MTOR,NFE2L2,NFkB (complex),PLA2G4A,PRKAA1,RELA,RICTOR,Smad2/3,SP1,STAT3,STAT6,TCF,TP53	3		-0.7	0.00155	0.0069	ANXA6,AP3M2,ATP5MC1,CDK5RAP3,CERS6,CLEC4E,COBL,COPG2,COX7A2L,CSMD3,DBP,DLST,GABRA1,GPR63,HECW2,HNRNPU,IER3,ILDR2,INTS1,ISLR2,JAZF1,JPT1,KCNQ3,KLHL29,LEF1,LEMD3,MAPT,mir-128,MRC2,MYO1D,NOX5,NRSN1,PHF11,PITRM1,PSMC3,PSMD8,PTGER4,PTPRE,PTPRU,PXN,RAD51C,RPA3,S100A13,STX12,TBXAS1,TMCC1,TMEM131,TRAP1,WIF1,ZNF366,ZNF608	51 (29)	28
IL36G		cytokine	APP,AR,CEBPA,CEBPB,Creb,CTNNB1,ERK1/2,estrogen receptor,FOXO1,GATA1,IKBKB,IKK (complex),IL36G,Jnk,JUN,MED1,MTOR,NFE2L2,NFkB (complex),PLA2G4A,PRKAA1,RELA,RICTOR,Smad2/3,SP1,STAT3,STAT6,TCF,TP53	3		-0.7	0.00155	0.0069	ANXA6,AP3M2,ATP5MC1,CDK5RAP3,CERS6,CLEC4E,COBL,COPG2,COX7A2L,CSMD3,DBP,DLST,GABRA1,GPR63,HECW2,HNRNPU,IER3,ILDR2,INTS1,ISLR2,JAZF1,JPT1,KCNQ3,KLHL29,LEF1,LEMD3,MAPT,mir-128,MRC2,MYO1D,NOX5,NRSN1,PHF11,PITRM1,PSMC3,PSMD8,PTGER4,PTPRE,PTPRU,PXN,RAD51C,RPA3,S100A13,STX12,TBXAS1,TMCC1,TMEM131,TRAP1,WIF1,ZNF366,ZNF608	51 (29)	28
Pak		group	CCND1,CDKN1B,CEBPB,Creb,DUSP1,EGFR,EIF4E,ERBB2,ERK,FOXO1,H2AX,IKBKB,MAP2K1,MAPK1,MTOR,NFkB (complex),NOS2,Notch,Pak,PARP1,Pkc(s),PPARG,RAF1,RB1,RELA,RXRA,SP1,STAT3,STK11,TP53	3		0	0.00154	0.0064	AHI1,ANXA6,AP3M2,CAD,CDC14B,CDK5RAP3,CERS6,CHCHD3,COBL,COPG2,CSMD3,DBP,GHITM,GPR63,INTS1,ISLR2,JPT1,KCNQ3,KLHL29,LAMP1,MAPT,mir-128,MYO1D,NELL2,NOX5,NTRK1,PHF11,POU2F1,PSMD8,PTGER4,PTPRU,PXN,RCAN3,RPA3,RPL7,SFXN1,SH2D2A,STX12,TBXAS1,TMCC1,TMEFF2,TRAP1,UBE4A,VAMP5,WWOX,ZEB2	46 (30)	26
IGFBP7		transporter	Akt,CDKN1B,DUSP1,EGFR,EP300,EZH2,FOXO1,FOXO3,IGFBP7,IRF3,Jnk,JUN,LIN28A,MAPK1,MAPK3,MTOR,NFAT5,NFE2L2,NFkB (complex),PARP1,PPARGC1A,RARA,RB1,RELA,SP1,STAT3,TSC2	3		0	0.00152	0.0027	AP3M2,CAD,CDK5RAP3,CHCHD3,CLEC4E,COBL,COPG2,DBP,DLST,FAM186A,FUS,GABRA1,GHITM,GPR63,HDGFL3,HECW2,HNRNPU,IGF2R,ISLR2,KCNQ3,LEMD3,MAPT,MKI67,MRC2,NELL2,NMI,NOX5,NRSN1,NTRK1,PHF11,POU2F1,PSMC3,PTGER4,PXN,RCAN3,RPA3,RPTOR,S100A13,SH2D2A,STX12,TMCC1,TMEFF2	42 (27)	24
BTN2A2		other	Akt,BTN2A2,CD3E,CDKN1B,DUSP1,EGFR,EP300,EZH2,FOXO1,FOXO3,FYN,IRF3,Jnk,JUN,LCP2,LIN28A,MAPK1,MAPK3,MTOR,NFAT5,NFE2L2,NFkB (complex),PARP1,PPARGC1A,RARA,RB1,RELA,SP1,STAT3,TSC2,ZAP70	3		0.152	0.00152	0.0042	AP3M2,CAD,CDK5RAP3,CHCHD3,CLEC4E,COBL,COPG2,DBP,DLST,FAM186A,FUS,GABRA1,GHITM,GPR63,HDGFL3,HECW2,HNRNPU,IGF2R,ISLR2,KCNQ3,LAMP1,LEMD3,MAPT,MKI67,MRC2,NELL2,NMI,NOX5,NRSN1,NTRK1,PHF11,POU2F1,PSMC3,PTGER4,PXN,RCAN3,RPA3,RPTOR,S100A13,SH2D2A,STX12,TMCC1,TMEFF2	43 (31)	26
Ighd		other	Akt,AR,CCND1,CDKN1B,CEBPB,Creb,DUSP1,EIF4E,EP300,ERK,EZH2,FOXO1,Ighd,IRF3,Jnk,JUN,MLXIPL,MTOR,NFAT5,NFkB (complex),NOS2,PPARG,PPARGC1A,RB1,RELA,RXRA,SIRT1,SP1,STAT3,TSC2	3		0.295	0.00151	0.004	AHI1,AP3M2,CDC42EP3,CDK5RAP3,CERS6,CHCHD3,CLEC4E,COBL,COPG2,DBP,DLST,GHITM,GPR63,HDGFL3,HECW2,HNRNPU,IER3,IGF2R,ILDR2,INTS1,ISLR2,JPT1,KCNQ3,LEMD3,LRCH1,MAPT,MKI67,MRC2,NTRK1,PHF11,PITRM1,PSMC3,PTGER4,PXN,RPA3,RPL7,RPTOR,SFXN1,SH2D2A,STX12,TBXAS1,TMCC1,TMEFF2,UBE4A,VAMP5,WWOX	46 (30)	27
NDST1		enzyme	CEBPA,CEBPB,Creb,CTNNB1,DUSP1,EGFR,ERK1/2,GATA1,GSK3B,JUN,LIN28A,MAPK1,MAPK14,MAPK3,MED1,MTOR,NDST1,NFE2L2,NFkB (complex),PARP1,PRKAA1,RARA,RELA,SP1,STAT3	3		0	0.00151	0.0033	AP3M2,CAD,CD82,CLEC4E,COBL,COPG2,DBP,FAM186A,FUS,GABRA1,HECW2,HNRNPU,IGF2R,INTS1,ISLR2,JAZF1,JPT1,KCNQ3,KLHL29,LEF1,LEMD3,MAPT,MKI67,NELL2,NMI,NOX5,NRSN1,NTRK1,PHF11,POU2F1,PSMC3,PTGER4,PTPRE,PXN,RCAN3,RPA3,S100A13,SH2D2A,STX12,TBXAS1,TMCC1,ZNF366	42 (25)	23
ATP1B1		transporter	ATP1B1,EGFR,IKBKB,IKK (complex),IRF3,Jnk,JUN,MAP2K7,MAP3K7,MTOR,NFkB (complex),RELA,SREBF1,TBK1,TP53	3		1.183	0.00151	0.0025	ANXA6,AP3M2,ATP5MC1,CAD,CDC42EP3,CERS6,CLEC4E,CSMD3,DLST,GPR63,HNRNPU,IGF2R,ISLR2,LEF1,MAP2K4,MAPT,mir-128,MKI67,MRC2,MYO1D,NMI,PHF11,PSMD8,PTGER4,PTPRU,PXN,RAD51C,RPL7,RPTOR,S100A13,SLC12A2,STX12,TMCC1,TRAP1,ZEB2	35 (15)	13
CHKA		kinase	Akt,CDKN1B,CHKA,DUSP1,EGFR,EP300,EZH2,FOXO1,FOXO3,IRF3,Jnk,JUN,LIN28A,MAPK1,MAPK3,MTOR,NFAT5,NFE2L2,NFkB (complex),PARP1,PPARGC1A,RARA,RB1,RELA,SP1,STAT3,TSC2	3		0	0.00149	0.0027	AP3M2,CAD,CDK5RAP3,CHCHD3,CLEC4E,COBL,COPG2,DBP,DLST,FAM186A,FUS,GABRA1,GHITM,GPR63,HDGFL3,HECW2,HNRNPU,IGF2R,ISLR2,KCNQ3,LEMD3,MAPT,MKI67,MRC2,NELL2,NMI,NOX5,NRSN1,NTRK1,PHF11,POU2F1,PSMC3,PTGER4,PXN,RCAN3,RPA3,RPTOR,S100A13,SH2D2A,STX12,TMCC1,TMEFF2	42 (27)	24
MOS		kinase	APP,AR,CCND1,CDK1,CEBPA,CEBPB,Creb,CREB1,CTNNB1,EGFR,EIF4E,ERK1/2,EZH2,GATA1,JUN,Mapk,MED1,MKNK1,MOS,MTOR,NFkB (complex),PRKAA1,RB1,RELA,RXRA,SOX2,SP1,STAT3,STAT5a/b,TP53	3		-0.849	0.00148	0.0081	AHI1,ANXA6,AP3M2,ATP5MC1,CAD,CD82,CERS6,CHCHD3,CLEC4E,COBL,COPG2,CSMD3,DBP,DLST,GHITM,HDGFL3,HECW2,HNRNPU,IGF2R,ILDR2,INTS1,ISLR2,JAZF1,JPT1,KCNQ3,KLHL29,LEF1,LEMD3,MAPT,mir-128,NELL2,NOX5,NTRK1,PITRM1,PSMD8,PTGER4,PTPRE,PTPRU,PXN,RPA3,RPL7,S100A13,SEMA5A,STX12,TBXAS1,TMCC1,TRAP1,UBE4A,WWOX,ZNF366	50 (30)	28
ACVR2B		kinase	ACVR2B,APP,AR,CEBPA,CEBPB,Creb,CTNNB1,ERK1/2,FOXO1,GATA1,IKBKB,Jnk,JUN,MED1,MMP14,MTOR,NFE2L2,NFkB (complex),PLA2G4A,PRKAA1,RELA,RICTOR,Smad2/3,SP1,STAT3,STAT6,TCF,TP53	3		-0.714	0.00146	0.0069	ANXA6,AP3M2,ATP5MC1,CDK5RAP3,CERS6,CLEC4E,COBL,COPG2,COX7A2L,CSMD3,DBP,DLST,GABRA1,GPR63,HECW2,HNRNPU,ILDR2,INTS1,ISLR2,JAZF1,JPT1,KCNQ3,KLHL29,LEF1,LEMD3,MAPT,mir-128,MRC2,MYO1D,NOX5,NRSN1,PHF11,PITRM1,PSMC3,PSMD8,PTGER4,PTPRE,PTPRU,PXN,RPA3,S100A13,STX12,TBXAS1,TMCC1,TMEM131,TRAP1,WIF1,ZNF366,ZNF608	49 (28)	26
MAP3K19		kinase	APP,AR,CEBPA,CEBPB,Creb,CTNNB1,EIF4E,ERK1/2,FOXO1,GATA1,IKBKB,Jnk,JUN,MAP2K1/2,MAP3K19,MAPK1,MED1,MKNK1,MTOR,NFE2L2,NFkB (complex),PLA2G4A,PRKAA1,RARA,RELA,RICTOR,Smad2/3,SP1,STAT3,STAT6,TCF,TP53	3		-0.687	0.00146	0.0095	ANXA6,AP3M2,ATP5MC1,CDK5RAP3,CERS6,CLEC4E,COBL,COPG2,COX7A2L,CSMD3,DBP,DLST,FAM186A,GABRA1,GPR63,HECW2,HNRNPU,ILDR2,INTS1,ISLR2,JAZF1,JPT1,KCNQ3,KLHL29,LEF1,MAPT,mir-128,MRC2,MYO1D,NELL2,NMI,NOX5,NRSN1,NTRK1,PITRM1,PSMC3,PSMD8,PTGER4,PTPRE,PTPRU,PXN,RCAN3,RPA3,S100A13,STX12,TBXAS1,TMCC1,TMEM131,TRAP1,UBE4A,WIF1,ZNF366,ZNF608	53 (32)	30
estrogen receptor		group	AR,CCND1,CEBPB,Creb,CREB1,DUSP1,EGFR,EIF4E,ERK,estrogen receptor,FOXO1,Hsp27,IKBKB,IRF3,Jnk,KRAS,MAP2K1,Mapk,MAPK1,MKNK1,MTOR,NFkB (complex),NOS2,NRAS,PI3K (complex),PLA2G4A,PPARG,RB1,RELA,SP1,STAT3,STAT5a/b,TP53	3		0.849	0.00146	0.0064	AHI1,ANXA6,AP3M2,ATP5MC1,CAD,CAMK1,CDK5RAP3,CHCHD3,CLEC4E,COBL,COPG2,CSMD3,DBP,GHITM,GPR63,ILDR2,INTS1,ISLR2,JPT1,KCNQ3,LEF1,MAPT,mir-128,MKI67,MRC2,MYO1D,NELL2,NMI,NOX5,NPR3,NTRK1,PITRM1,PSMD8,PTGER4,PTPRU,PXN,RCAN3,RPA3,RPL7,RPTOR,SFXN1,SH2D2A,STX12,TBXAS1,TMCC1,TRAP1,TRIM11,UBE4A,VAMP5,WWOX	50 (33)	31
P2rx7		ion channel	CEBPA,CEBPB,Creb,EGFR,EP300,ERK1/2,ESR1,GATA1,IKK (complex),Jnk,JUN,MED1,MTOR,NFE2L2,NFkB (complex),P2rx7,PRKAA1,PRKCD,PTK2B,RB1,RELA,SP1,STAT3,TP53	3		-0.149	0.00145	0.0062	ANXA6,AP3M2,ATP5MC1,CAD,CERS6,CHCHD3,CLEC4E,COPG2,CSMD3,DBP,FAM186A,GABRA1,GHITM,GPR63,HECW2,HNRNPU,IGF2R,INTS1,ISLR2,JAZF1,JPT1,KCNQ3,KLHL29,LAMP1,LEMD3,MAPT,mir-128,MRC2,NRSN1,NTRK1,PSMC3,PSMD8,PTGER4,PTPRE,PTPRU,PXN,RAD51C,RPA3,RPL7,S100A13,STX12,TBXAS1,TMCC1,TRAP1,ZNF366	45 (24)	22

## Sheet: RPE_IPA_CNA
Master Regulator	Expr Log Ratio	Molecule Type	Participating regulators	Depth	Predicted Activation	Activation z-score	p-value of overlap	Network bias-corrected p-value	Target Molecules in Dataset	Causal network	Target-connected regulators	Macular degeneration (Length | Paths)
RPTOR	-1.084	other	Akt,ERK1/2,FMR1,PI3K (complex),RB1CC1,REL,RPS6KB1,RPTOR,TP73,ULK1,Vegf	3	Inhibited	-2.646	0.000492	0.0037	BDNF,CAMLG,CORO2B,EIF2AK3,FAIM2,GTF2H4,SKI	7 (11)	6	3 | 1
ceramide		chemical - endogenous mammalian	calpain,ceramide,CYP19A1,ERK1/2,FAS,Mapk,NFkB (complex),P38 MAPK	2	Inhibited	-2.236	0.00275	0.0401	ANGPT1,BDNF,EIF2AK3,FAIM2,GRIA4	5 (8)	7
ITGA5		transmembrane receptor	calpain,ERK1/2,ITGA5,P38 MAPK	2	Inhibited	-2	0.00198	0.0421	ANGPT1,BDNF,EIF2AK3,GRIA4	4 (4)	3
ERN1	0.076	kinase	ERN1,NFkB (complex),P38 MAPK,XBP1	2	Inhibited	-2	0.00209	0.0448	ANGPT1,BDNF,EDEM2,EIF2AK3	4 (4)	3
2-(4-(4-(benzyloxy)benzyl)piperazin-1-yl)-N'-(3,5-di-tert-butyl-2-hydroxybenzylidene)acetohydrazide		chemical reagent	2-(4-(4-(benzyloxy)benzyl)piperazin-1-yl)-N'-(3,5-di-tert-butyl-2-hydroxybenzylidene)acetohydrazide,Calcineurin protein(s),calpain,CASP3,CASP7,DICER1,ERK1/2,PTEN	3	Inhibited	-2	0.0032	0.0478	ANGPT1,BDNF,EIF2AK3,GRIA4	4 (8)	5
RBM4B		other	Calcineurin protein(s),calpain,CASP3,CASP7,DICER1,ERK1/2,PTEN,RBM4B	3	Inhibited	-2	0.0032	0.0478	ANGPT1,BDNF,EIF2AK3,GRIA4	4 (8)	5
BCL2L12		other	BCL2L12,Calcineurin protein(s),calpain,CASP3,CASP7,DICER1,ERK1/2,PTEN	3	Activated	2	0.0032	0.0478	ANGPT1,BDNF,EIF2AK3,GRIA4	4 (8)	5
ROCK1	-0.167	kinase	Akt,CDKN1B,ERK1/2,FMR1,PTEN,ROCK1,RPS6KB1,TP73,Vegf	3		-1.89	0.00157	0.0111	ANGPT1,BDNF,CAMLG,CORO2B,EIF2AK3,FAIM2,GRIA4	7 (9)	6
CDK5R2		other	CDK5R2,MAPT,NR3C1	2		-1.732	0.000237	0.0037	BDNF,EIF2AK3,GRIA4	3 (3)	3
SLC8A1		transporter	ERK1/2,P38 MAPK,SLC8A1	2		-1.732	0.00192	0.0461	ANGPT1,BDNF,EIF2AK3	3 (3)	2	3 | 1
SLC12A3		transporter	ERK1/2,P38 MAPK,SLC12A3	2		-1.732	0.00196	0.047	ANGPT1,BDNF,EIF2AK3	3 (3)	2
BIM 23A760		chemical drug	BIM 23A760,ERK1/2,P38 MAPK	2		-1.732	0.00196	0.0471	ANGPT1,BDNF,EIF2AK3	3 (3)	2
Tpi(6)-Leu(13)-psi(CH2NH)-Leu(14)-bombesin (6-14)		chemical reagent	ERK1/2,P38 MAPK,Tpi(6)-Leu(13)-psi(CH2NH)-Leu(14)-bombesin (6-14)	2		-1.732	0.00198	0.0467	ANGPT1,BDNF,EIF2AK3	3 (3)	2
5-oxo-6-8-11-14-(e,z,z,z)-eicosatetraenoic acid		chemical - endogenous mammalian	5-oxo-6-8-11-14-(e,z,z,z)-eicosatetraenoic acid,ERK1/2,P38 MAPK	2		-1.732	0.00199	0.0451	ANGPT1,BDNF,EIF2AK3	3 (3)	2
CH-223191		chemical reagent	CH-223191,ERK1/2,P38 MAPK	2		-1.732	0.00199	0.0476	ANGPT1,BDNF,EIF2AK3	3 (3)	2
esculetin		chemical - endogenous non-mammalian	ERK1/2,esculetin,P38 MAPK	2		-1.732	0.00203	0.047	ANGPT1,BDNF,EIF2AK3	3 (3)	2
CYBA		enzyme	CYBA,ERK1/2,P38 MAPK	2		-1.732	0.00213	0.0491	ANGPT1,BDNF,EIF2AK3	3 (3)	2
2,4,5,2',4',5'-hexachlorobiphenyl		chemical toxicant	2,4,5,2',4',5'-hexachlorobiphenyl,ERK1/2,P38 MAPK	2		-1.732	0.00249	0.05	ANGPT1,BDNF,EIF2AK3	3 (3)	2	3 | 1
TRPM2	0.075	ion channel	calpain,ERK1/2,TRPM2	2		-1.732	0.00251	0.0446	BDNF,EIF2AK3,GRIA4	3 (3)	2
MAP3K1		kinase	calpain,CHUK,ERK1/2,FAS,IKBKB,Jnk,JUN,MAP2K1/2,MAP2K6,MAP3K1,Mapk,MAPK3,MAPT,mir-21,NFkB (complex),NFKBIA,P38 MAPK,REL,STAT3,TP73,XBP1	3		-1.667	0.000567	0.0047	ANGPT1,BDNF,CAMLG,EDEM2,EIF2AK3,FAIM2,GRIA4,GTF2H4,SKI	9 (21)	13
Csf2ra-Csf2rb		complex	CDKN1B,Csf2ra-Csf2rb,ERK1/2,HCK,JAK2,LYN,P38 MAPK,PTPN11,REL,SHC1,TP73	3		-1.633	0.00247	0.0198	ANGPT1,BDNF,CAMLG,EIF2AK3,GRIA4,GTF2H4	6 (11)	6
hispidulin		chemical drug	Akt,ERK1/2,hispidulin,KDR,MTOR,PI3K (complex),RB1CC1,REL,TP73,Vegf	3		-1.633	0.00307	0.0244	BDNF,CAMLG,EIF2AK3,FAIM2,GTF2H4,SKI	6 (10)	5
TICAM2		other	calpain,FAS,Jnk,MAPK3,NFkB (complex),NR3C1,P38 MAPK,TICAM2,TP73,XBP1	3		-1.633	0.00448	0.0293	ANGPT1,BDNF,CAMLG,EDEM2,FAIM2,GRIA4	6 (10)	7	3 | 1
ADCYAP1	0.173	other	ADCYAP1	1		-1.414	0.00394	0.035	ANGPT1,BDNF	2 (1)	1
norepinephrine		chemical - endogenous mammalian	norepinephrine	1		-1.414	0.00413	0.0307	BDNF,EIF2AK3	2 (1)	1	3 | 6
XBP1	0.1	transcription regulator	XBP1	1		-1.414	0.00539	0.0132	EDEM2,EIF2AK3	2 (1)	1	3 | 2
miR-4258 (miRNAs w/seed CCCGCCA)		mature microRNA	miR-4258 (miRNAs w/seed CCCGCCA)	1		-1.414	0.00681	0.0156	FAIM2,GTF2H4	2 (1)	1
miR-7108-3p (miRNAs w/seed CCCGCCC)		mature microRNA	miR-7108-3p (miRNAs w/seed CCCGCCC)	1		-1.414	0.0192	0.0384	FAIM2,GTF2H4	2 (1)	1
STXBP1		transporter	CDK5,MAPT,STXBP1	2		-1.414	0.001	0.0134	BDNF,EIF2AK3	2 (3)	2
opioid		chemical drug	Mapk,MAPT,opioid	2		-1.414	0.00195	0.0266	BDNF,EIF2AK3	2 (3)	2
miR-26a-5p (and other miRNAs w/seed UCAAGUA)		mature microRNA	CDK5,MAPT,miR-26a-5p (and other miRNAs w/seed UCAAGUA)	2		-1.414	0.00706	0.0329	BDNF,EIF2AK3	2 (3)	2
Integrin		complex	ABL1,calpain,Creb,CTNNB1,EGFR,ERK1/2,FAS,FMR1,GRIA4,HRAS,Integrin,Jnk,MAP2K1/2,Mapk,MAPK1,MAPK3,P38 MAPK,PI3K (complex),Pkc(s),REL,RPS6KB1,SHC1,SRC,SYK,TGFB1,TP73,XBP1	3		-1.265	0.000373	0.0032	ANGPT1,BDNF,CAMLG,CORO2B,EDEM2,EIF2AK3,FAIM2,GABBR1,GRIA4,GTF2H4	10 (27)	15	3 | 2
3-methyladenine		chemical toxicant	3-methyladenine,Akt,CTSB,FMR1,NFkB (complex),P38 MAPK,PI3K (complex),REL,RPS6KB1,TBK1,TP73,Vegf	3		-1.134	0.00115	0.0097	ANGPT1,BDNF,CAMLG,CORO2B,EIF2AK3,FAIM2,GTF2H4	7 (12)	7	3 | 1
TRAF5		transporter	ERK1/2,FAS,Jnk,MAPK3,mir-21,NFKBIA,P38 MAPK,REL,STAT3,TP73,TRAF5,XBP1	3		-1.134	0.00182	0.0142	ANGPT1,CAMLG,EDEM2,EIF2AK3,FAIM2,GTF2H4,SKI	7 (12)	7	3 | 1
GSK2656157		chemical drug	GSK2656157	1		-1	0.000791	0.0164	BDNF	1 (1)	1
3,4-diaminopyridine		chemical drug	3,4-diaminopyridine	1		-1	0.000791	0.0164	BDNF	1 (1)	1
Hdac-Rcor-Rest-Sin3a		complex	Hdac-Rcor-Rest-Sin3a	1		-1	0.000791	0.0164	BDNF	1 (1)	1
GRIN2A		ion channel	GRIN2A	1		-1	0.000791	0.0164	BDNF	1 (1)	1
NTSR1		G-protein coupled receptor	NTSR1	1		-1	0.000791	0.0164	BDNF	1 (1)	1
GET1		other	GET1	1		-1	0.000791	0.0025	CAMLG	1 (1)	1
uridine triacetate		chemical drug	uridine triacetate	1		-1	0.000791	0.0164	BDNF	1 (1)	1
EEF2	-0.117	translation regulator	EEF2	1		-1	0.000791	0.0164	BDNF	1 (1)	1
Crhr		group	Crhr	1		-1	0.000791	0.0164	BDNF	1 (1)	1
rivastigmine		chemical drug	rivastigmine	1		-1	0.000791	0.0164	BDNF	1 (1)	1
N-acetylserotonin		chemical - endogenous mammalian	N-acetylserotonin	1		-1	0.000791	0.0164	BDNF	1 (1)	1
UNC0224		chemical reagent	UNC0224	1		-1	0.000791	0.0164	BDNF	1 (1)	1
MAP3K		group	MAP3K	1		-1	0.00158	0.0189	BDNF	1 (1)	1
HIP1	0.062	other	HIP1	1		-1	0.00158	0.0186	BDNF	1 (1)	1	3 | 1
deltamethrin		chemical toxicant	deltamethrin	1		-1	0.00158	0.0164	BDNF	1 (1)	1
SGS742		chemical drug	SGS742	1		-1	0.00158	0.0183	BDNF	1 (1)	1
N-[4-chloro-3-(trifluoromethyl)phenyl]-2-propoxybenzamide		chemical reagent	N-[4-chloro-3-(trifluoromethyl)phenyl]-2-propoxybenzamide	1		-1	0.00158	0.0181	BDNF	1 (1)	1
MAPK8IP2		other	MAPK8IP2	1		-1	0.00158	0.0164	BDNF	1 (1)	1
smilagenin		chemical drug	smilagenin	1		-1	0.00158	0.0164	BDNF	1 (1)	1
penfluridol		chemical drug	penfluridol	1		-1	0.00158	0.0192	BDNF	1 (1)	1
GRIN2B		ion channel	GRIN2B	1		-1	0.00158	0.0184	BDNF	1 (1)	1	3 | 1
UNG	-0.071	enzyme	UNG	1		-1	0.00158	0.0164	BDNF	1 (1)	1
venlafaxine		chemical drug	venlafaxine	1		-1	0.00316	0.0164	BDNF	1 (1)	1
HEXIM1		transcription regulator	HEXIM1	1		-1	0.00316	0.0189	ANGPT1	1 (1)	1
PPP1CC		phosphatase	PPP1CC	1		-1	0.00316	0.0164	BDNF	1 (1)	1
ritanserin		chemical drug	ritanserin	1		-1	0.00158	0.0164	BDNF	1 (1)	1
papaverine		chemical drug	papaverine	1		-1	0.00158	0.0181	BDNF	1 (1)	1
glyceollin		chemical - endogenous non-mammalian	glyceollin	1		-1	0.00237	0.0045	ANGPT1	1 (1)	1
enecadin		chemical drug	enecadin	1		-1	0.00237	0.0164	BDNF	1 (1)	1
MZB1	-0.021	other	MZB1	1		-1	0.00237	0.0348	BDNF	1 (1)	1
cycloserine		chemical drug	cycloserine	1		-1	0.00237	0.0194	BDNF	1 (1)	1
SKF-83959		chemical reagent	SKF-83959	1		-1	0.00237	0.0197	BDNF	1 (1)	1
HTR2C		G-protein coupled receptor	HTR2C	1		-1	0.00237	0.0329	BDNF	1 (1)	1	3 | 2
pramipexole		chemical drug	pramipexole	1		-1	0.00237	0.0316	BDNF	1 (1)	1
CDK5R2		other	CDK5R2	1		-1	0.00237	0.0164	BDNF	1 (1)	1
NPAS4	0.224	transcription regulator	NPAS4	1		-1	0.00237	0.0203	BDNF	1 (1)	1
CAMK2A		kinase	CAMK2A	1		-1	0.00237	0.0164	BDNF	1 (1)	1
modafinil		chemical drug	modafinil	1		-1	0.00237	0.0164	BDNF	1 (1)	1
aripiprazole		chemical drug	aripiprazole	1		-1	0.00237	0.0316	BDNF	1 (1)	1
mecamylamine		chemical drug	mecamylamine	1		-1	0.00237	0.0192	BDNF	1 (1)	1
oleandrin		chemical drug	oleandrin	1		-1	0.00237	0.0192	BDNF	1 (1)	1
PITX3		transcription regulator	PITX3	1		-1	0.00237	0.0194	BDNF	1 (1)	1
N-retinylidene-N-retinylethanolamine		chemical - endogenous mammalian	N-retinylidene-N-retinylethanolamine	1		-1	0.00316	0.026	EIF2AK3	1 (1)	1
quisqualic acid		chemical - endogenous non-mammalian	quisqualic acid	1		-1	0.00395	0.033	BDNF	1 (1)	1	3 | 1
mGLUR Group I		group	mGLUR Group I	1		-1	0.00395	0.0221	BDNF	1 (1)	1	3 | 1
muscimol		chemical drug	muscimol	1		-1	0.00395	0.019	BDNF	1 (1)	1	3 | 1
P2RX4	-0.112	ion channel	P2RX4	1		-1	0.00316	0.0344	BDNF	1 (1)	1
CAMKK2		kinase	CAMKK2	1		-1	0.00316	0.0329	BDNF	1 (1)	1	3 | 2
necrostatin-1		chemical reagent	necrostatin-1	1		-1	0.00316	0.033	BDNF	1 (1)	1
GALNS	0.063	enzyme	GALNS	1		-1	0.00316	0.022	BDNF	1 (1)	1
DRD5		G-protein coupled receptor	DRD5	1		-1	0.00316	0.0324	BDNF	1 (1)	1
alpha-amino-3-hydroxy-5-methyl-4-isoxazolepropionic acid		chemical reagent	alpha-amino-3-hydroxy-5-methyl-4-isoxazolepropionic acid	1		-1	0.00395	0.0277	BDNF	1 (1)	1
tetraethylammonium		chemical drug	tetraethylammonium	1		-1	0.00395	0.0327	BDNF	1 (1)	1	3 | 1
sGC		complex	sGC	1		-1	0.00395	0.0481	BDNF	1 (1)	1
N-methyl-3,4-methylenedioxyamphetamine		chemical drug	N-methyl-3,4-methylenedioxyamphetamine	1		-1	0.00395	0.024	BDNF	1 (1)	1
SLC2A4	-0.073	transporter	SLC2A4	1		-1	0.00395	0.0426	BDNF	1 (1)	1
ITPR1		ion channel	ITPR1	1		-1	0.00395	0.0354	BDNF	1 (1)	1
phenelzine		chemical drug	phenelzine	1		-1	0.00474	0.0209	BDNF	1 (1)	1
Ampa Receptor		complex	Ampa Receptor	1		-1	0.00474	0.0383	BDNF	1 (1)	1	3 | 1
ADCYAP1R1		G-protein coupled receptor	ADCYAP1R1	1		-1	0.00474	0.0215	BDNF	1 (1)	1	3 | 1
IFT57	-0.156	other	IFT57	1		-1	0.00474	0.0239	BDNF	1 (1)	1
aroclor 1254		chemical toxicant	aroclor 1254	1		-1	0.00553	0.0229	BDNF	1 (1)	1	3 | 1
selegiline		chemical drug	selegiline	1		-1	0.00474	0.021	BDNF	1 (1)	1
HCRT	-0.037	other	HCRT	1		-1	0.00474	0.0332	BDNF	1 (1)	1	3 | 1
PTN	-0.002	growth factor	PTN	1		-1	0.00474	0.0331	BDNF	1 (1)	1	3 | 1
levetiracetam		chemical drug	levetiracetam	1		-1	0.00553	0.0283	BDNF	1 (1)	1
dipyridamole		chemical drug	dipyridamole	1		-1	0.00553	0.034	BDNF	1 (1)	1
bevacizumab		biologic drug	bevacizumab	1		-1	0.00553	0.0275	ANGPT1	1 (1)	1	1 | 1
riluzole		chemical drug	riluzole	1		-1	0.00553	0.0253	BDNF	1 (1)	1
DRD1	-0.264	G-protein coupled receptor	DRD1	1		-1	0.00553	0.0376	BDNF	1 (1)	1
mirtazapine		chemical drug	mirtazapine	1		-1	0.00553	0.0247	BDNF	1 (1)	1
USP37		peptidase	USP37	1		-1	0.00553	0.0226	BDNF	1 (1)	1
L-type Calcium Channel		complex	L-type Calcium Channel	1		-1	0.00553	0.0192	BDNF	1 (1)	1
carbamazepine		chemical drug	carbamazepine	1		-1	0.00553	0.0219	BDNF	1 (1)	1
arachidic acid		chemical - endogenous mammalian	arachidic acid	1		-1	0.00632	0.0052	EIF2AK3	1 (1)	1	3 | 1
NDP		growth factor	NDP	1		-1	0.00632	0.0245	BDNF	1 (1)	1	3 | 1
ziprasidone		chemical drug	ziprasidone	1		-1	0.00632	0.0268	BDNF	1 (1)	1
CRTC1		transcription regulator	CRTC1	1		-1	0.00632	0.0214	BDNF	1 (1)	1
CD74		transmembrane receptor	CD74	1		-1	0.00632	0.0362	BDNF	1 (1)	1
allopurinol		chemical drug	allopurinol	1		-1	0.0102	0.05	BDNF	1 (1)	1	3 | 1
glycine		chemical - endogenous mammalian	glycine	1		-1	0.0102	0.0347	BDNF	1 (1)	1	3 | 1
HAND1		transcription regulator	HAND1	1		-1	0.0102	0.0154	ANGPT1	1 (1)	1
CaMKII		complex	CaMKII	1		-1	0.0102	0.0248	BDNF	1 (1)	1
bilirubin		chemical - endogenous mammalian	bilirubin	1		-1	0.0102	0.0279	BDNF	1 (1)	1	3 | 1
LTB4R2		G-protein coupled receptor	LTB4R2	1		-1	0.0071	0.0394	EIF2AK3	1 (1)	1	3 | 1
POU3F1		transcription regulator	POU3F1	1		-1	0.0071	0.0222	SKI	1 (1)	1
sertraline		chemical drug	sertraline	1		-1	0.0071	0.0279	BDNF	1 (1)	1
mGluR		group	mGluR	1		-1	0.0071	0.0408	BDNF	1 (1)	1	3 | 1
quinpirole		chemical reagent	quinpirole	1		-1	0.0071	0.0347	BDNF	1 (1)	1	3 | 1
tranylcypromine		chemical drug	tranylcypromine	1		-1	0.0071	0.0238	BDNF	1 (1)	1
mocetinostat		chemical drug	mocetinostat	1		-1	0.00789	0.0499	BDNF	1 (1)	1
CAMK2D	-0.077	kinase	CAMK2D	1		-1	0.00789	0.0461	BDNF	1 (1)	1
CNB-001		chemical reagent	CNB-001	1		-1	0.00789	0.0496	BDNF	1 (1)	1
CDK5		kinase	CDK5	1		-1	0.00867	0.0353	BDNF	1 (1)	1	3 | 1
NFATC4	0.045	transcription regulator	NFATC4	1		-1	0.00867	0.0455	BDNF	1 (1)	1
VEGFD		growth factor	VEGFD	1		-1	0.00867	0.0252	BDNF	1 (1)	1
methylphenidate		chemical drug	methylphenidate	1		-1	0.00867	0.0403	BDNF	1 (1)	1
NMDA Receptor		complex	NMDA Receptor	1		-1	0.011	0.0369	BDNF	1 (1)	1
quetiapine		chemical drug	quetiapine	1		-1	0.00946	0.046	BDNF	1 (1)	1
imipramine		chemical drug	imipramine	1		-1	0.00867	0.0243	BDNF	1 (1)	1
amitriptyline		chemical drug	amitriptyline	1		-1	0.00946	0.0371	BDNF	1 (1)	1
miR-5692a (miRNAs w/seed AAAUAAU)		mature microRNA	miR-5692a (miRNAs w/seed AAAUAAU)	1		-1	0.00946	0.0108	GRIA4	1 (1)	1
lead		chemical toxicant	lead	1		-1	0.0118	0.0475	GRIA4	1 (1)	1	3 | 1
desipramine		chemical drug	desipramine	1		-1	0.0126	0.0412	BDNF	1 (1)	1	3 | 1
LHX2	-0.059	transcription regulator	LHX2	1		-1	0.0134	0.034	BDNF	1 (1)	1
miR-4311 (miRNAs w/seed AAAGAGA)		mature microRNA	miR-4311 (miRNAs w/seed AAAGAGA)	1		-1	0.0142	0.0268	GRIA4	1 (1)	1
(1S,2R)-NCL-1		chemical reagent	(1S,2R)-NCL-1	1		-1	0.0149	0.0418	EIF2AK3	1 (1)	1
propylthiouracil		chemical drug	propylthiouracil	1		-1	0.0149	0.0491	BDNF	1 (1)	1
NCD-38		chemical reagent	NCD-38	1		-1	0.0149	0.0418	EIF2AK3	1 (1)	1
miR-4735-5p (miRNAs w/seed CUAAUUU)		mature microRNA	miR-4735-5p (miRNAs w/seed CUAAUUU)	1		-1	0.0165	0.0295	GRIA4	1 (1)	1	3 | 1
miR-8074 (miRNAs w/seed UAUGGCG)		mature microRNA	miR-8074 (miRNAs w/seed UAUGGCG)	1		-1	0.0219	0.0452	ANGPT1	1 (1)	1
miR-323-3p (and other miRNAs w/seed ACAUUAC)		mature microRNA	miR-323-3p (and other miRNAs w/seed ACAUUAC)	1		-1	0.0219	0.0211	GRIA4	1 (1)	1
LOC105372576		other	LOC105372576	1		-1	0.0227	0.0341	EIF2AK3	1 (1)	1
miR-6124 (miRNAs w/seed GGAAAAG)		mature microRNA	miR-6124 (miRNAs w/seed GGAAAAG)	1		-1	0.0243	0.0461	GRIA4	1 (1)	1
miR-6510-3p (miRNAs w/seed ACCGACU)		mature microRNA	miR-6510-3p (miRNAs w/seed ACCGACU)	1		-1	0.025	0.0271	GRIA4	1 (1)	1
ELL2		transcription regulator	ELL2	1		-1	0.0381	0.044	EDEM2	1 (1)	1
IRF6		transcription regulator	ERK1/2,IRF6,Mapk,P38 MAPK,REL	2		-1	0.00112	0.0328	ANGPT1,BDNF,EIF2AK3,GTF2H4	4 (5)	4	3 | 2
F10	0.067	peptidase	ERK1/2,F10,F2R,F2RL1,HGF,MAPK1,PROC	2		-1	0.00129	0.0322	ANGPT1,BDNF,EIF2AK3,FAIM2	4 (7)	6
norepinephrine		chemical - endogenous mammalian	EGFR,FAS,GRIA4,Jnk,MAPK14,MAPK3,norepinephrine,NR3C1,P38 MAPK,PI3K (complex),Pka,Pkc(s),REL,TP73,XBP1	3		-1	0.000409	0.0045	ANGPT1,BDNF,CAMLG,EDEM2,EIF2AK3,FAIM2,GABBR1,GRIA4,GTF2H4	9 (15)	8	3 | 6
okadaic acid		chemical toxicant	Akt,calpain,CAMK2A,CAMK2D,EGFR,ERK1/2,FAS,FMR1,GRIA4,Jnk,MAPK3,MAPT,mir-21,NFKBIA,okadaic acid,Pkc(s),REL,STAT3,TP53,Vegf,XBP1	3		-1	0.000697	0.0057	BDNF,CORO2B,EDEM2,EIF2AK3,FAIM2,GABBR1,GRIA4,GTF2H4,SKI	9 (21)	12	3 | 2
L-methionine		chemical - endogenous mammalian	Akt,ERK1/2,FMR1,L-methionine,PI3K (complex),PI3K (family),REL,RPS6KB1,TP73,Vegf	3		-0.816	0.00248	0.0167	BDNF,CAMLG,CORO2B,EIF2AK3,FAIM2,GTF2H4	6 (10)	6	2 | 1
CSF3		cytokine	Akt,CDKN1B,CSF3,ERK1/2,FAS,FMR1,GRIA4,Jnk,JUN,LYN,MAP2K1/2,MAPK1,MAPK3,MAPK7,mir-21,NFkB (complex),P38 MAPK,Pka,REL,RPS6KB1,SHC1,STAT3,SYK,Vegf,XBP1	3		-0.632	0.000127	0.0014	ANGPT1,BDNF,CORO2B,EDEM2,EIF2AK3,FAIM2,GABBR1,GRIA4,GTF2H4,SKI	10 (25)	16
dopamine		chemical - endogenous mammalian	dopamine	1		-0.577	9.98e-05	0.0012	BDNF,GABBR1,GRIA4	3 (1)	1	3 | 2
miR-3150b-3p (and other miRNAs w/seed GAGGAGA)		mature microRNA	miR-3150b-3p (and other miRNAs w/seed GAGGAGA)	1		-0.577	0.000915	0.0062	FAIM2,GRIA4,RIC3	3 (1)	1
KLK4		peptidase	ERK1/2,F2R,KLK4	2		-0.577	0.000608	0.0108	ANGPT1,BDNF,EIF2AK3	3 (3)	2
PROCR	-0.072	other	ERK1/2,PROCR	2		-0.577	0.000785	0.0146	ANGPT1,BDNF,EIF2AK3	3 (2)	2
Sphk		group	ERK1/2,sphingosine-1-phosphate,Sphk	2		-0.577	0.00117	0.0277	ANGPT1,BDNF,EIF2AK3	3 (3)	2
PRKCZ	-0.105	kinase	Akt,CDK5,ERK1/2,FAS,FMR1,Jnk,MAP2K1/2,Mapk,MAPK1,MAPK3,mir-21,NFkB (complex),P38 MAPK,PRKCZ,REL,RPS6KB1,SMARCA4,SMPD1,SP1,STAT3,STK11,Vegf,XBP1	3		-0.333	0.000377	0.0023	ANGPT1,BDNF,CORO2B,EDEM2,EIF2AK3,FAIM2,GTF2H4,SKI,STARD10	9 (23)	15
MAPK1		kinase	Akt,BCL2L11,CaMKII,CDKN1B,EGFR,FAS,FMR1,GRIA4,KLF4,MAPK1,MAPK3,MAPT,mir-21,NR3C1,POU5F1,REL,RPS6KB1,SHC1,STAT3,SYK,TP53,TP73,Vegf,XBP1	3		-0.302	1.91e-05	0.0004	ANGPT1,BDNF,CAMLG,CORO2B,EDEM2,EIF2AK3,FAIM2,GABBR1,GRIA4,GTF2H4,SKI	11 (24)	15	3 | 1
CGA		other	CGA	1		0	0.002	0.0061	BDNF,EDEM2	2 (1)	1	3 | 1
miR-4686 (miRNAs w/seed AUCUGCU)		mature microRNA	miR-4686 (miRNAs w/seed AUCUGCU)	1		0	0.0027	0.0074	GRIA4,SCAF11	2 (1)	1
NGF		growth factor	NGF	1		0	0.00292	0.0353	BDNF,GRIA4	2 (1)	1	3 | 1
NR3C1	0.063	ligand-dependent nuclear receptor	NR3C1	1		0	0.00467	0.0398	BDNF,GRIA4	2 (1)	1
miR-1248 (miRNAs w/seed CCUUCUU)		mature microRNA	miR-1248 (miRNAs w/seed CCUUCUU)	1		0	0.00616	0.0106	GABBR1,SCAF11	2 (1)	1
miR-6868-3p (miRNAs w/seed UCCUUCU)		mature microRNA	miR-6868-3p (miRNAs w/seed UCCUUCU)	1		0	0.00801	0.0201	GABBR1,SCAF11	2 (1)	1
miR-6820-5p (miRNAs w/seed GCGGCAG)		mature microRNA	miR-6820-5p (miRNAs w/seed GCGGCAG)	1		0	0.00855	0.024	FAIM2,SKI	2 (1)	1	3 | 1
miR-6836-3p (miRNAs w/seed UGCCUCC)		mature microRNA	miR-6836-3p (miRNAs w/seed UGCCUCC)	1		0	0.0103	0.0287	CAMLG,FAIM2	2 (1)	1
miR-6901-5p (miRNAs w/seed GCAGGAA)		mature microRNA	miR-6901-5p (miRNAs w/seed GCAGGAA)	1		0	0.0116	0.0419	FAIM2,RIC3	2 (1)	1
miR-6791-3p (and other miRNAs w/seed GCCUCCU)		mature microRNA	miR-6791-3p (and other miRNAs w/seed GCCUCCU)	1		0	0.0146	0.0392	CAMLG,FAIM2	2 (1)	1
miR-4260 (and other miRNAs w/seed UUGGGGC)		mature microRNA	miR-4260 (and other miRNAs w/seed UUGGGGC)	1		0	0.0159	0.05	SKI,STARD10	2 (1)	1	3 | 1
TMEM175		ion channel	CTSB,SNCA,TMEM175	2		0	0.0095	0.0476	BDNF,EIF2AK3	2 (3)	2	3 | 1
uridine triacetate		chemical drug	MAPT,uridine triacetate	2		0	0.000233	0.003	BDNF,EIF2AK3	2 (2)	2
GABA receptor		complex	calpain,GABA receptor	2		0	0.000361	0.0035	BDNF,GRIA4	2 (2)	2
(1S,2R)-NCL-1		chemical reagent	(1S,2R)-NCL-1,EIF2AK3	2		0	0.000937	0.0073	BDNF,EIF2AK3	2 (2)	2
NCD-38		chemical reagent	EIF2AK3,NCD-38	2		0	0.000937	0.0073	BDNF,EIF2AK3	2 (2)	2
D-mannose		chemical - endogenous mammalian	CTSB,D-mannose,Mapk	2		0	0.00114	0.0166	BDNF,EIF2AK3	2 (3)	2
Rp-8-Br-cAMPS		chemical - kinase inhibitor	calpain,Rp-8-Br-cAMPS	2		0	0.00362	0.0337	BDNF,GRIA4	2 (2)	2	3 | 1
BCR (complex)		complex	ACTB,Akt,BCR (complex),CREB1,ERK1/2,FAS,FMR1,GRIA4,Jnk,LYN,MAP2K1/2,Mapk,MAPK1,MAPK3,mir-21,NFkB (complex),P38 MAPK,Pkc(s),REL,RPS6KB1,SMARCA4,STAT3,TP53,Vegf,XBP1	3		0	0.000357	0.0013	ANGPT1,BDNF,CORO2B,EDEM2,EIF2AK3,FAIM2,GABBR1,GTF2H4,SKI,STARD10	10 (25)	17	3 | 2
tyrphostin AG490		chemical drug	Akt,EGFR,ERK1/2,FAS,FMR1,MAPK1,MAPK3,mir-21,REL,RPS6KB1,SHC1,STAT3,TP73,tyrphostin AG490,Vegf,XBP1	3		0	0.00191	0.015	BDNF,CAMLG,CORO2B,EDEM2,EIF2AK3,FAIM2,GTF2H4,SKI	8 (16)	9	3 | 1
MAPK8		kinase	APP,BCL2L11,EGFR,FAS,FMR1,ITCH,Jnk,MAPK8,MAPT,mir-21,MYC,NFATC3,NR3C1,REL,RPS6KB1,SHC1,SIRT1,STAT3,TP53,TP73,XBP1	3		0.333	0.00156	0.0118	ANGPT1,CAMLG,CORO2B,EDEM2,EIF2AK3,FAIM2,GRIA4,GTF2H4,SKI	9 (21)	11	3 | 4
FOXO3	-0.067	transcription regulator	Akt,BCL2L11,ERK1/2,FMR1,FOXO3,MAP2K1/2,MTOR,RB1CC1,RPS6KB1,TP73,Vegf,XBP1	3		0.378	0.00154	0.0171	BDNF,CAMLG,CORO2B,EDEM2,EIF2AK3,FAIM2,SKI	7 (12)	7	3 | 3
chondroitin sulfate		chemical - endogenous mammalian	chondroitin sulfate,MAPT,P38 MAPK,PROC	2		0.577	0.000794	0.024	ANGPT1,BDNF,EIF2AK3	3 (4)	3
suramin		chemical drug	Akt,CARM1,EGFR,ERK1/2,FAS,MAPK1,MAPK3,mir-21,NFkB (complex),P2RX4,P38 MAPK,PRKCZ,REL,SIRT1,SMARCA4,STAT3,suramin,Vegf,XBP1	3		0.707	0.00125	0.0102	ANGPT1,BDNF,EDEM2,EIF2AK3,FAIM2,GTF2H4,SKI,STARD10	8 (19)	12	3 | 1
GRIA4	1.567	ion channel	GRIA4	1		1	0.000791	0.003	GABBR1	1 (1)	1
HCN1		ion channel	HCN1	1		1	0.000791	0.0164	BDNF	1 (1)	1
SERPINE2	-0.036	other	SERPINE2	1		1	0.000791	0.0164	BDNF	1 (1)	1
zolpidem		chemical drug	zolpidem	1		1	0.000791	0.0164	BDNF	1 (1)	1
IGF2-AS		other	IGF2-AS	1		1	0.00158	0.0192	BDNF	1 (1)	1
SNHG7		other	SNHG7	1		1	0.00158	0.0194	FAIM2	1 (1)	1
AKAP12	-0.02	transporter	AKAP12	1		1	0.00316	0.0189	ANGPT1	1 (1)	1
L-phenylalanine		chemical - endogenous mammalian	L-phenylalanine	1		1	0.00316	0.0393	BDNF	1 (1)	1
RNF111		enzyme	RNF111	1		1	0.00237	0.0228	SKI	1 (1)	1
CADPS		other	CADPS	1		1	0.00237	0.02	BDNF	1 (1)	1
ibotenic acid		chemical toxicant	ibotenic acid	1		1	0.00237	0.0329	BDNF	1 (1)	1
WIN 55,212-2		chemical - other	WIN 55,212-2	1		1	0.00395	0.0191	BDNF	1 (1)	1	3 | 1
ifenprodil		chemical drug	ifenprodil	1		1	0.00395	0.0353	BDNF	1 (1)	1	3 | 1
6-cyano-7-nitroquinoxaline-2,3-dione		chemical reagent	6-cyano-7-nitroquinoxaline-2,3-dione	1		1	0.00395	0.0478	BDNF	1 (1)	1	3 | 1
GRPR		G-protein coupled receptor	GRPR	1		1	0.00316	0.0164	BDNF	1 (1)	1
AP20187		chemical reagent	AP20187	1		1	0.00395	0.0313	BDNF	1 (1)	1
GABA receptor		complex	GABA receptor	1		1	0.00395	0.0216	BDNF	1 (1)	1
scopolamine		chemical drug	scopolamine	1		1	0.00553	0.0366	BDNF	1 (1)	1
acetazolamide		chemical drug	acetazolamide	1		1	0.00474	0.0233	EIF2AK3	1 (1)	1
RB1CC1	-0.025	other	RB1CC1	1		1	0.00553	0.0409	SKI	1 (1)	1
nicardipine		chemical drug	nicardipine	1		1	0.00553	0.0213	BDNF	1 (1)	1	3 | 1
ABCA7	0.28	transporter	ABCA7	1		1	0.00553	0.0289	EIF2AK3	1 (1)	1
2,3-dioxo-6-nitro-7-sulfamoylbenzo(f)quinoxaline		chemical reagent	2,3-dioxo-6-nitro-7-sulfamoylbenzo(f)quinoxaline	1		1	0.00553	0.0353	BDNF	1 (1)	1	3 | 1
raclopride		chemical drug	raclopride	1		1	0.00632	0.0217	BDNF	1 (1)	1	3 | 1
ryanodine		chemical - endogenous non-mammalian	ryanodine	1		1	0.00632	0.026	BDNF	1 (1)	1
ELF3		transcription regulator	ELF3	1		1	0.0102	0.0372	ANGPT1	1 (1)	1
GABA		chemical - endogenous mammalian	GABA	1		1	0.0102	0.0385	BDNF	1 (1)	1
EFNB2	-0.126	kinase	EFNB2	1		1	0.00632	0.0146	ANGPT1	1 (1)	1
Rp-8-Br-cAMPS		chemical - kinase inhibitor	Rp-8-Br-cAMPS	1		1	0.0071	0.0199	BDNF	1 (1)	1	3 | 1
miR-340-5p (miRNAs w/seed UAUAAAG)		mature microRNA	miR-340-5p (miRNAs w/seed UAUAAAG)	1		1	0.0071	0.0234	BDNF	1 (1)	1
APLNR		G-protein coupled receptor	APLNR	1		1	0.0071	0.0181	ANGPT1	1 (1)	1
naltrindole		chemical drug	naltrindole	1		1	0.00789	0.0249	BDNF	1 (1)	1	3 | 1
EPHX2		enzyme	EPHX2	1		1	0.00867	0.0415	BDNF	1 (1)	1
NR2F2		ligand-dependent nuclear receptor	NR2F2	1		1	0.00946	0.0106	ANGPT1	1 (1)	1
nimodipine		chemical drug	nimodipine	1		1	0.0118	0.0447	BDNF	1 (1)	1	3 | 1
nicotinic acid		chemical - endogenous mammalian	nicotinic acid	1		1	0.0118	0.0339	ANGPT1	1 (1)	1
TLX3		transcription regulator	TLX3	1		1	0.0126	0.034	GRIA4	1 (1)	1
PROCR	-0.072	other	PROCR	1		1	0.0126	0.0423	ANGPT1	1 (1)	1
miR-3473g (and other miRNAs w/seed AAAAGUG)		mature microRNA	miR-3473g (and other miRNAs w/seed AAAAGUG)	1		1	0.0188	0.0262	CAMLG	1 (1)	1
miR-369-5p (miRNAs w/seed GAUCGAC)		mature microRNA	miR-369-5p (miRNAs w/seed GAUCGAC)	1		1	0.0204	0.0218	CAMLG	1 (1)	1
miR-544-5p (miRNAs w/seed CUUGUUA)		mature microRNA	miR-544-5p (miRNAs w/seed CUUGUUA)	1		1	0.025	0.0385	SCAF11	1 (1)	1
miR-548h-5p (and other miRNAs w/seed AAAGUAA)		mature microRNA	miR-548h-5p (and other miRNAs w/seed AAAGUAA)	1		1	0.0304	0.0412	CAMLG	1 (1)	1
miR-937-5p (miRNAs w/seed UGAGUCA)		mature microRNA	miR-937-5p (miRNAs w/seed UGAGUCA)	1		1	0.0304	0.0302	SCAF11	1 (1)	1	3 | 1
miR-1537-3p (miRNAs w/seed AAACCGU)		mature microRNA	miR-1537-3p (miRNAs w/seed AAACCGU)	1		1	0.0304	0.0452	EIF2AK3	1 (1)	1
miR-5571-3p (miRNAs w/seed UCCUAGG)		mature microRNA	miR-5571-3p (miRNAs w/seed UCCUAGG)	1		1	0.0312	0.0434	RIC3	1 (1)	1
miR-4517 (miRNAs w/seed AAUAUGA)		mature microRNA	miR-4517 (miRNAs w/seed AAUAUGA)	1		1	0.0335	0.0272	SCAF11	1 (1)	1
miR-3920 (miRNAs w/seed CUGAUUA)		mature microRNA	miR-3920 (miRNAs w/seed CUGAUUA)	1		1	0.0373	0.0488	CAMLG	1 (1)	1
miR-218-2-3p (and other miRNAs w/seed AUGGUUC)		mature microRNA	miR-218-2-3p (and other miRNAs w/seed AUGGUUC)	1		1	0.0442	0.0429	RIC3	1 (1)	1
COMT		enzyme	COMT,dopamine,norepinephrine	2		1	5.13e-05	0.0014	BDNF,EIF2AK3,GABBR1,GRIA4	4 (3)	2
tyrphostin AG 1478		chemical drug	Akt,calpain,CDKN1B,CREB1,EGF,EGFR,ERK1/2,FAS,FMR1,Jnk,JUN,Mapk,MAPK1,MAPK3,mir-21,NFkB (complex),P38 MAPK,PI3K (complex),REL,RPS6KB1,SHC1,STAT3,tyrphostin AG 1478,Vegf,XBP1	3		1	0.00118	0.008	ANGPT1,BDNF,CORO2B,EDEM2,EIF2AK3,FAIM2,GRIA4,GTF2H4,SKI	9 (25)	16
FZR1	-0.079	kinase	APC (complex),CCNA2,CDKN1B,FMR1,FZR1,GMNN,Mapk,SKIL,TP53	3		1.342	0.00239	0.0336	ANGPT1,BDNF,CORO2B,EIF2AK3,GRIA4	5 (9)	5
miR-4277 (miRNAs w/seed CAGUUCU)		mature microRNA	miR-4277 (miRNAs w/seed CAGUUCU)	1		1.414	0.00059	0.0012	CAMLG,SCAF11	2 (1)	1
miR-5195-5p (miRNAs w/seed ACCCCUA)		mature microRNA	miR-5195-5p (miRNAs w/seed ACCCCUA)	1		1.414	0.00309	0.0093	CAMLG,RIC3	2 (1)	1
SHH		peptidase	SHH	1		1.414	0.0032	0.0339	ANGPT1,EIF2AK3	2 (1)	1	3 | 1
miR-6072 (and other miRNAs w/seed CCUCAUC)		mature microRNA	miR-6072 (and other miRNAs w/seed CCUCAUC)	1		1.414	0.00585	0.0131	RIC3,SCAF11	2 (1)	1
loperamide		chemical drug	calpain,L-type Calcium Channel,loperamide	2		1.414	0.000402	0.0048	BDNF,GRIA4	2 (3)	2	3 | 1
nitrendipine		chemical drug	calpain,L-type Calcium Channel,nitrendipine	2		1.414	0.000492	0.0057	BDNF,GRIA4	2 (3)	2	3 | 1
alsterpaullone		chemical reagent	alsterpaullone,CDK5,MAPT	2		1.414	0.00104	0.0104	BDNF,EIF2AK3	2 (3)	2
SHH		peptidase	Akt,ERK1/2,FAS,GRIA4,Gsk3,MTOR,PI3K (complex),Pkc(s),RB1CC1,REL,SHH,TP73,Vegf	3		1.414	0.000688	0.0065	ANGPT1,BDNF,CAMLG,EIF2AK3,FAIM2,GABBR1,GTF2H4,SKI	8 (13)	8	3 | 1
CAST	-0.072	peptidase	calpain,CAST,CDK5,MAPT	2		1.732	2.28e-05	0.0006	BDNF,EIF2AK3,GRIA4	3 (4)	3	3 | 1
edaravone		chemical drug	edaravone,MAPT,P38 MAPK	2		1.732	0.00162	0.0428	ANGPT1,BDNF,EIF2AK3	3 (3)	2
vigabatrin		chemical drug	ERK1/2,P38 MAPK,vigabatrin	2		1.732	0.00191	0.048	ANGPT1,BDNF,EIF2AK3	3 (3)	2
ALDH2		enzyme	ALDH2,ERK1/2,P38 MAPK	2		1.732	0.00194	0.0471	ANGPT1,BDNF,EIF2AK3	3 (3)	2
ALK3-BMPR2		complex	ALK3-BMPR2,ERK1/2,P38 MAPK	2		1.732	0.00194	0.0467	ANGPT1,BDNF,EIF2AK3	3 (3)	2
CALCRL		G-protein coupled receptor	CALCRL,ERK1/2,P38 MAPK	2		1.732	0.00196	0.0467	ANGPT1,BDNF,EIF2AK3	3 (3)	2
B3GNT2	0.028	enzyme	B3GNT2,ERK1/2,P38 MAPK	2		1.732	0.00196	0.0473	ANGPT1,BDNF,EIF2AK3	3 (3)	2
